# Supplementary material
Source: publisher figshare collection journal article supplement (https://gsajournals.figshare.com/ndownloader/files/11093981)
Supplement: Supplementary file 1 [file 11093981]

ord	ID	TrialUnitID	YEAR	SampleNo	LDAY	LCAROUSEL	LWELL	EXPT	Funit	FROW	FRANGE	FREP	FBAY	TREATMENT	NIRBarcodeNo	WSCCPrediction	Unit	Dehydrator	Counter	GrinderBatch	Rep1NIRBarcodeNo	Rep2NIRBarcodeNo	NIRRepLevel	Neil_ReplicationLevel	Field_COMMENT	IEXPT	LOCATION
1	WW20192	111172	2009	447	1	1	1	W9A09COLE	757	8	52	1	2	IRR	80001	1.4676	mg/g	Leeton Hurricane 20/10	NA	NA	80001	NA	1	1		W9A09COLE_IRR	COLE
2	HRZ05_0283	113702	2009	1033	1	1	2	W9A09COLE	189	29	62	2	3	IRR	80002	2.1328	mg/g	Yanco Hurricane 19/10	NA	NA	80002	82821	1	2		W9A09COLE_IRR	COLE
3	GLADIUS	115858	2009	2328	1	1	3	W9A09YANA	77	13	82	2	3	RFD	80003	0.85642	mg/g	Lucerne Dehydrator 5/10 - 13/10	NA	NA	80003	NA	1	1		W9A09YANA_RFD	YANA
4	WW19750	111887	2009	521	1	1	4	W9A09COLE	737	14	47	1	2	IRR	80004	1.6849	mg/g	Leeton Hurricane 20/10	NA	NA	80004	NA	1	1		W9A09COLE_IRR	COLE
5	SUN562A	117282	2009	2815	1	1	5	W9A09YANA	366	24	98	2	4	IRR	80005	1.3831	mg/g	Hurricane Dehydrator 13/10/09	NA	NA	80005	NA	1	1		W9A09YANA_IRR	YANA
6	VT2474	111569	2009	850	1	1	6	W9A09COLE	387	11	89	2	3	IRR	80006	1.8371	mg/g	Lucerne Dehydrator 19/10	NA	NA	80006	NA	1	1		W9A09COLE_IRR	COLE
7	WW19662	110621	2009	1120	1	1	7	W9A09COLE	726	3	101	2	4	RFD	80007	1.2361	mg/g	Lucerne Dehydrator 19/10	NA	NA	80007	NA	1	1		W9A09COLE_RFD	COLE
8	WW20689	115216	2009	2271	1	1	8	W9A09YANA	791	8	80	2	3	RFD	80008	0.91878	mg/g	Lucerne Dehydrator 5/10 - 13/10	NA	NA	80008	82736	1	2	W9A08COLE	W9A09YANA_RFD	YANA
9	HRZ05_0101	110518	2009	1115	1	1	9	W9A09COLE	161	2	118	2	4	RFD	80009	1.4707	mg/g	Lucerne Dehydrator 19/10	NA	NA	80009	NA	1	1		W9A09COLE_RFD	COLE
10	9329_13	112830	2009	233	1	1	10	W9A09COLE	23	22	30	1	1	RFD	80010	2.6988	mg/g	Yanco Hurricane 20/10	NA	NA	80010	NA	1	1		W9A09COLE_RFD	COLE
11	SUN534D	115667	2009	1631	1	1	11	W9A09YANA	359	12	19	1	1	IRR	80011	1.5578	mg/g	Lucerne Dehydrator 5/10 - 13/10	NA	NA	80011	NA	1	1		W9A09YANA_IRR	YANA
12	WW20527	112377	2009	564	1	1	12	W9A09COLE	772	18	57	1	2	IRR	80012	1.2718	mg/g	Leeton Hurricane 20/10	NA	NA	80012	NA	1	1		W9A09COLE_IRR	COLE
13	R901D	117226	2009	2101	1	1	13	W9A09YANA	322	24	42	1	2	RFD	80013	1.2765	mg/g	Lucerne Dehydrator 5/10 - 13/10	NA	NA	80013	83181	1	2		W9A09YANA_RFD	YANA
14	120854_183	116036	2009	1671	1	1	14	W9A09YANA	4	15	4	1	1	IRR	80014	1.7929	mg/g	Lucerne Dehydrator 13/10/09	NA	NA	80014	NA	1	1		W9A09YANA_IRR	YANA
15	VW3466	112456	2009	201	1	1	15	W9A09COLE	498	19	16	1	1	RFD	80015	2.0571	mg/g	Lucerne Dehydrator 20/10	NA	NA	80015	NA	1	1		W9A09COLE_RFD	COLE
16	VW2324	116816	2009	1733	1	1	16	W9A09YANA	467	21	16	1	1	IRR	80016	0.99446	mg/g	Lucerne Dehydrator 5/10 - 13/10	NA	NA	80016	NA	1	1		W9A09YANA_IRR	YANA
17	VENTURA	116302	2009	1696	1	1	17	W9A09YANA	376	17	14	1	1	IRR	80017	1.5882	mg/g	Lucerne Dehydrator 5/10 - 13/10	NA	NA	80017	81914	1	2		W9A09YANA_IRR	YANA
18	WW19866	114461	2009	2206	1	1	18	W9A09YANA	742	2	93	2	3	RFD	80018	0.78113	mg/g	Lucerne Dehydrator 5/10 - 13/10	NA	NA	80018	NA	1	1		W9A09YANA_RFD	YANA
19	VW2782	113395	2009	1376	1	1	19	W9A09COLE	482	26	115	2	4	RFD	80019	2.0473	mg/g	Lucerne Dehydrator 19/10	NA	NA	80019	82341	1	2		W9A09COLE_RFD	COLE
20	WAGT033	111269	2009	105	1	1	20	W9A09COLE	530	9	29	1	1	RFD	80020	1.7862	mg/g	Lucerne Dehydrator 20/10	NA	NA	80020	NA	1	1		W9A09COLE_RFD	COLE
21	WW19743	115989	2009	2345	1	1	21	W9A09YANA	735	14	85	2	3	RFD	80021	1.0011	mg/g	Lucerne Dehydrator then Leeton Farm 13/10/09	NA	NA	80021	NA	1	1		W9A09YANA_RFD	YANA
22	PAVON_DWARF	116236	2009	2364	1	1	22	W9A09YANA	301	16	76	2	3	RFD	80022	0.97563	mg/g	Lucerne Dehydrator 5/10 - 13/10	NA	NA	80022	NA	1	1		W9A09YANA_RFD	YANA
23	WW20469	114500	2009	1492	1	1	23	W9A09YANA	768	3	4	1	1	IRR	80023	1.5081	mg/g	Lucerne Dehydrator 13/10/09	NA	NA	80023	82205	1	2		W9A09YANA_IRR	YANA
24	HRZ06_0145	114204	2009	1092	1	1	24	W9A09COLE	223	33	84	2	3	IRR	80024	2.8056	mg/g	Yanco Hurricane 19/10	NA	NA	80024	NA	1	1		W9A09COLE_IRR	COLE
25	WW19684	110885	2009	66	1	1	25	W9A09COLE	731	6	5	1	1	RFD	80025	NA	mg/g	Yanco Hurricane 22/10	NA	NA	80025	NA	1	1		W9A09COLE_RFD	COLE
26	HRZ04_0420	110643	2009	38	1	1	26	W9A09COLE	146	4	3	1	1	RFD	80026	2.6417	mg/g	Lucerne Dehydrator 20/10	NA	NA	80026	NA	1	1		W9A09COLE_RFD	COLE
27	WW20192	110873	2009	1149	1	1	27	W9A09COLE	757	5	113	2	4	RFD	80027	0.64022	mg/g	Lucerne Dehydrator 19/10	NA	NA	80027	81746	1	2		W9A09COLE_RFD	COLE
28	HRZ04_0157	113938	2009	708	1	1	28	W9A09COLE	118	31	58	1	2	IRR	80028	1.6783	mg/g	Leeton Hurricane 20/10	NA	NA	80028	NA	1	1		W9A09COLE_IRR	COLE
29	WW19662	112238	2009	549	1	1	29	W9A09COLE	726	17	38	1	2	IRR	80029	2.513	mg/g	Leeton Hurricane 20/10	NA	NA	80029	NA	1	1		W9A09COLE_IRR	COLE
30	HRZ05_0145	111825	2009	1233	1	1	30	W9A09COLE	177	13	105	2	4	RFD	80030	1.2914	mg/g	Lucerne Dehydrator 19/10	NA	NA	80030	NA	1	1		W9A09COLE_RFD	COLE
31	WW21859	115663	2009	1629	1	2	1	W9A09YANA	831	12	15	1	1	IRR	80031	0.93752	mg/g	Lucerne Dehydrator 5/10 - 13/10	NA	NA	80031	NA	1	1		W9A09YANA_IRR	YANA
32	B1272T	118086	2009	1822	1	2	2	W9A09YANA	44	31	6	1	1	IRR	80032	1.8766	mg/g	Lucerne Dehydrator 5/10 - 13/10	NA	NA	80032	NA	1	1		W9A09YANA_IRR	YANA
33	WW19201	113125	2009	987	1	2	3	W9A09COLE	697	24	85	2	3	IRR	80033	2.1954	mg/g	Yanco Hurricane 19/10	NA	NA	80033	82808	1	2		W9A09COLE_IRR	COLE
34	WW15839	111623	2009	130	1	2	4	W9A09COLE	601	12	23	1	1	RFD	80034	2.3693	mg/g	Yanco Hurricane 20/10	NA	NA	80034	NA	1	1		W9A09COLE_RFD	COLE
35	HRZ04_0227	112220	2009	185	1	2	5	W9A09COLE	130	17	20	1	1	RFD	80035	1.8212	mg/g	Lucerne Dehydrator 20/10	NA	NA	80035	NA	1	1		W9A09COLE_RFD	COLE
36	CHARA	111619	2009	128	1	2	6	W9A09COLE	52	12	19	1	1	RFD	80036	2.0668	mg/g	Lucerne Dehydrator 20/10	NA	NA	80036	NA	1	1		W9A09COLE_RFD	COLE
37	HRZ06_0488	112179	2009	1263	1	2	7	W9A09COLE	252	16	99	2	4	RFD	80037	2.0842	mg/g	Lucerne Dehydrator 19/10	NA	NA	80037	NA	1	1		W9A09COLE_RFD	COLE
38	HRZ06_0292	116262	2009	2702	1	2	8	W9A09YANA	243	16	102	2	4	IRR	80038	1.7331	mg/g	Hurricane Dehydrator 13/10/09	NA	NA	80038	NA	1	1		W9A09YANA_IRR	YANA
39	ROSELLA	111991	2009	524	1	2	9	W9A09COLE	346	15	31	1	2	IRR	80039	0.36596	mg/g	Leeton Hurricane 20/10	NA	NA	80039	NA	1	1		W9A09COLE_IRR	COLE
40	VW2405	115268	2009	1586	1	2	10	W9A09YANA	474	9	4	1	1	IRR	80040	1.0961	mg/g	Lucerne Dehydrator 5/10 - 13/10	NA	NA	80040	81889	1	2		W9A09YANA_IRR	YANA
41	HRZ05_0245	112071	2009	1256	1	2	11	W9A09COLE	188	15	111	2	4	RFD	80041	1.3664	mg/g	Lucerne Dehydrator 19/10	NA	NA	80041	NA	1	1		W9A09COLE_RFD	COLE
42	RAC1374	113692	2009	690	1	2	12	W9A09COLE	324	29	52	1	2	IRR	80042	1.5836	mg/g	Leeton Hurricane 20/10	NA	NA	80042	NA	1	1		W9A09COLE_IRR	COLE
43	HRZ06_2082	115178	2009	1924	1	2	13	W9A09YANA	265	8	42	1	2	RFD	80043	1.1762	mg/g	Lucerne Dehydrator 5/10 - 13/10	NA	NA	80043	NA	1	1		W9A09YANA_RFD	YANA
44	VW0404	112944	2009	243	1	2	14	W9A09COLE	432	23	24	1	1	RFD	80044	2.2751	mg/g	Yanco Hurricane 20/10	NA	NA	80044	NA	1	1		W9A09COLE_RFD	COLE
45	ELLISON	117935	2009	2882	1	2	15	W9A09YANA	67	29	111	2	4	IRR	80045	1.3589	mg/g	Hurricane Dehydrator 13/10/09	NA	NA	80045	82087	1	2		W9A09YANA_IRR	YANA
46	HRZ06_0491	112543	2009	1304	1	2	16	W9A09COLE	253	19	103	2	4	RFD	80046	1.218	mg/g	Lucerne Dehydrator 19/10	NA	NA	80046	NA	1	1		W9A09COLE_RFD	COLE
47	QT13365	115899	2009	2678	1	2	17	W9A09YANA	314	13	123	2	4	IRR	80047	1.6783	mg/g	Hurricane Dehydrator 13/10/09	NA	NA	80047	NA	1	1		W9A09YANA_IRR	YANA
48	WEEBILL1	117124	2009	2443	1	2	18	W9A09YANA	550	23	68	2	3	RFD	80048	1.6684	mg/g	Lucerne Dehydrator 5/10 - 13/10	NA	NA	80048	NA	1	1		W9A09YANA_RFD	YANA
49	HRZ06_0067	115368	2009	2624	1	2	19	W9A09YANA	213	9	104	2	4	IRR	80049	1.6382	mg/g	Hurricane Dehydrator 13/10/09	NA	NA	80049	NA	1	1		W9A09YANA_IRR	YANA
50	LPB04_2324	116169	2009	1684	1	2	20	W9A09YANA	287	16	9	1	1	IRR	80050	1.25	mg/g	Lucerne Dehydrator 13/10/09	NA	NA	80050	NA	1	1		W9A09YANA_IRR	YANA
51	WW21162	111680	2009	861	1	2	21	W9A09COLE	806	12	80	2	3	IRR	80051	1.381	mg/g	Lucerne Dehydrator 19/10	NA	NA	80051	83123	1	2		W9A09COLE_IRR	COLE
52	WW21573	116066	2009	2006	1	2	22	W9A09YANA	825	15	34	1	2	RFD	80052	1.3988	mg/g	Lucerne Dehydrator 5/10 - 13/10	NA	NA	80052	NA	1	1	W9A08COLE	W9A09YANA_RFD	YANA
53	WW19561	111685	2009	863	1	2	23	W9A09COLE	711	12	85	2	3	IRR	80053	2.0268	mg/g	Lucerne Dehydrator 19/10	NA	NA	80053	NA	1	1		W9A09COLE_IRR	COLE
54	WW16259	117964	2009	1814	1	2	24	W9A09YANA	603	30	12	1	1	IRR	80054	1.0378	mg/g	Lucerne Dehydrator 5/10 - 13/10	NA	NA	80054	NA	1	1		W9A09YANA_IRR	YANA
55	SUN534D	115184	2009	1928	1	2	25	W9A09YANA	359	8	48	1	2	RFD	80055	1.1478	mg/g	Lucerne Dehydrator 5/10 - 13/10	NA	NA	80055	NA	1	1		W9A09YANA_RFD	YANA
56	VW1193	117417	2009	2830	1	2	26	W9A09YANA	449	25	105	2	4	IRR	80056	1.4998	mg/g	Hurricane Dehydrator 13/10/09	NA	NA	80056	81788	1	2		W9A09YANA_IRR	YANA
57	RAC1429	112458	2009	202	1	2	27	W9A09COLE	332	19	18	1	1	RFD	80057	1.7838	mg/g	Lucerne Dehydrator 20/10	NA	NA	80057	NA	1	1		W9A09COLE_RFD	COLE
58	WW20577	117433	2009	2835	1	2	28	W9A09YANA	776	25	121	2	4	IRR	80058	1.3757	mg/g	Hurricane Dehydrator 13/10/09	NA	NA	80058	82830	1	2	Seed lost	W9A09YANA_IRR	YANA
59	HRZ05_0145	114205	2009	1093	1	2	29	W9A09COLE	177	33	85	2	3	IRR	80059	2.6037	mg/g	Yanco Hurricane 19/10	NA	NA	80059	NA	1	1		W9A09COLE_IRR	COLE
60	DIAMONDBIRD	113550	2009	308	1	2	30	W9A09COLE	58	28	30	1	1	RFD	80060	1.9924	mg/g	Yanco Hurricane 20/10	NA	NA	80060	82601	1	2		W9A09COLE_RFD	COLE
61	VW0373	116558	2009	1718	1	3	1	W9A09YANA	424	19	14	1	1	IRR	80061	1.0737	mg/g	Lucerne Dehydrator 5/10 - 13/10	NA	NA	80061	NA	1	1		W9A09YANA_IRR	YANA
62	R901D	113643	2009	309	1	3	2	W9A09COLE	322	29	3	1	1	RFD	80062	1.8536	mg/g	Yanco Hurricane 20/10	NA	NA	80062	NA	1	1		W9A09COLE_RFD	COLE
63	WW19884	111271	2009	451	1	3	3	W9A09COLE	745	9	31	1	2	IRR	80063	1.6392	mg/g	Leeton Hurricane 20/10	NA	NA	80063	NA	1	1		W9A09COLE_IRR	COLE
64	QT13359	115959	2009	2002	1	3	4	W9A09YANA	313	14	55	1	2	RFD	80064	1.5046	mg/g	Lucerne Dehydrator 5/10 - 13/10	NA	NA	80064	NA	1	1		W9A09YANA_RFD	YANA
65	VENTURA	111584	2009	1207	1	3	5	W9A09COLE	376	11	104	2	4	RFD	80065	1.2422	mg/g	Lucerne Dehydrator 19/10	NA	NA	80065	NA	1	1		W9A09COLE_RFD	COLE
66	WW20652	116432	2009	1709	1	3	6	W9A09YANA	784	18	16	1	1	IRR	80066	0.90397	mg/g	Lucerne Dehydrator 5/10 - 13/10	NA	NA	80066	81901	1	2		W9A09YANA_IRR	YANA
67	WW20192	114801	2009	1884	1	3	7	W9A09YANA	757	5	49	1	2	RFD	80067	0.90425	mg/g	Lucerne Dehydrator 5/10 - 13/10	NA	NA	80067	NA	1	1		W9A09YANA_RFD	YANA
68	VW4355	110746	2009	1137	1	3	8	W9A09COLE	520	4	106	2	4	RFD	80068	1.4552	mg/g	Lucerne Dehydrator 19/10	NA	NA	80068	NA	1	1		W9A09COLE_RFD	COLE
69	B1272C4	116250	2009	2367	1	3	9	W9A09YANA	43	16	90	2	3	RFD	80069	0.7653	mg/g	Lucerne Dehydrator 5/10 - 13/10	NA	NA	80069	82421	1	2		W9A09YANA_RFD	YANA
70	VW3466	114967	2009	2248	1	3	10	W9A09YANA	498	6	87	2	3	RFD	80070	1.0104	mg/g	Lucerne Dehydrator 5/10 - 13/10	NA	NA	80070	NA	1	1		W9A09YANA_RFD	YANA
71	JANZ	116273	2009	2707	1	3	11	W9A09YANA	278	16	113	2	4	IRR	80071	2.0584	mg/g	Hurricane Dehydrator 13/10/09	NA	NA	80071	NA	1	1		W9A09YANA_IRR	YANA
72	WW19663	117898	2009	2520	1	3	12	W9A09YANA	727	29	74	2	3	RFD	80072	0.90036	mg/g	Lucerne Dehydrator then Leeton Farm 13/10/09	NA	NA	80072	NA	1	1		W9A09YANA_RFD	YANA
73	SUPER_SERI_1	113944	2009	1063	1	3	13	W9A09COLE	374	31	64	2	3	IRR	80073	2.6811	mg/g	Yanco Hurricane 19/10	NA	NA	80073	NA	1	1		W9A09COLE_IRR	COLE
74	WW20665	117043	2009	2796	1	3	14	W9A09YANA	786	22	115	2	4	IRR	80074	1.8251	mg/g	Hurricane Dehydrator 13/10/09	NA	NA	80074	82992	1	2		W9A09YANA_IRR	YANA
75	ELLISON	112067	2009	1254	1	3	15	W9A09COLE	67	15	107	2	4	RFD	80075	1.8606	mg/g	Lucerne Dehydrator 19/10	NA	NA	80075	NA	1	1		W9A09COLE_RFD	COLE
76	HRZ06_0147	116024	2009	2685	1	3	16	W9A09YANA	224	14	120	2	4	IRR	80076	2.0605	mg/g	Hurricane Dehydrator 13/10/09	NA	NA	80076	NA	1	1		W9A09YANA_IRR	YANA
77	HRZ06_0079	111668	2009	855	1	3	17	W9A09COLE	220	12	68	2	3	IRR	80077	1.115	mg/g	Lucerne Dehydrator 19/10	NA	NA	80077	NA	1	1		W9A09COLE_IRR	COLE
78	WW19513	115623	2009	2648	1	3	18	W9A09YANA	707	11	103	2	4	IRR	80078	1.5123	mg/g	Hurricane Dehydrator 13/10/09	NA	NA	80078	82804	1	2		W9A09YANA_IRR	YANA
79	VU2828_1	111203	2009	815	1	3	19	W9A09COLE	390	8	83	2	3	IRR	80079	1.6374	mg/g	Lucerne Dehydrator 19/10	NA	NA	80079	NA	1	1		W9A09COLE_IRR	COLE
80	VW3404	110642	2009	37	1	3	20	W9A09COLE	493	4	2	1	1	RFD	80080	1.6597	mg/g	Lucerne Dehydrator 20/10	NA	NA	80080	NA	1	1		W9A09COLE_RFD	COLE
81	SUPER_SERI_1	114791	2009	1881	1	3	22	W9A09YANA	374	5	39	1	2	RFD	80082	1.9105	mg/g	Lucerne Dehydrator then Leeton Farm 13/10/09	NA	NA	80082	82950	1	2		W9A09YANA_RFD	YANA
82	WW9696	111593	2009	1209	1	3	23	W9A09COLE	837	11	113	2	4	RFD	80083	1.4405	mg/g	Lucerne Dehydrator 19/10	NA	NA	80083	NA	1	1		W9A09COLE_RFD	COLE
83	114892_109	111774	2009	510	1	3	24	W9A09COLE	2	13	54	1	2	IRR	80084	1.5506	mg/g	Leeton Hurricane 20/10	NA	NA	80084	NA	1	1		W9A09COLE_IRR	COLE
84	WW20214	110655	2009	42	1	3	25	W9A09COLE	758	4	15	1	1	RFD	80085	1.6358	mg/g	Lucerne Dehydrator 20/10	NA	NA	80085	82577	1	2		W9A09COLE_RFD	COLE
85	AUS33585	118171	2009	2553	1	3	27	W9A09YANA	35	31	91	2	3	RFD	80087	1.7264	mg/g	Lucerne Dehydrator 5/10 - 13/10	NA	NA	80087	NA	1	1		W9A09YANA_RFD	YANA
86	WW19884	117878	2009	2165	1	3	28	W9A09YANA	745	29	54	1	2	RFD	80088	0.94517	mg/g	Lucerne Dehydrator 5/10 - 13/10	NA	NA	80088	NA	1	1		W9A09YANA_RFD	YANA
87	VW2405	117033	2009	2791	1	3	29	W9A09YANA	474	22	105	2	4	IRR	80089	1.5878	mg/g	Hurricane Dehydrator 13/10/09	NA	NA	80089	NA	1	1		W9A09YANA_IRR	YANA
88	HRZ03_0076	116902	2009	2774	1	3	30	W9A09YANA	103	21	102	2	4	IRR	80090	1.3938	mg/g	Hurricane Dehydrator 13/10/09	NA	NA	80090	NA	1	1		W9A09YANA_IRR	YANA
89	133513_133	116263	2009	2703	1	4	1	W9A09YANA	5	16	103	2	4	IRR	80091	1.7584	mg/g	Hurricane Dehydrator 13/10/09	NA	NA	80091	82164	1	2		W9A09YANA_IRR	YANA
90	HRZ06_0034	115101	2009	2260	1	4	2	W9A09YANA	193	7	93	2	3	RFD	80092	0.90455	mg/g	Lucerne Dehydrator 5/10 - 13/10	NA	NA	80092	NA	1	1		W9A09YANA_RFD	YANA
91	VW3397	113964	2009	1070	1	4	3	W9A09COLE	490	31	84	2	3	IRR	80093	2.4073	mg/g	Yanco Hurricane 19/10	NA	NA	80093	NA	1	1		W9A09COLE_IRR	COLE
92	EGA_WILLS	113374	2009	1366	1	4	4	W9A09COLE	66	26	94	2	4	RFD	80094	1.8683	mg/g	Lucerne Dehydrator 19/10	NA	NA	80094	82539	1	2		W9A09COLE_RFD	COLE
93	120854_183	114104	2009	1445	1	4	5	W9A09COLE	4	32	104	2	4	RFD	80095	2.4267	mg/g	Lucerne Dehydrator 19/10	NA	NA	80095	NA	1	1		W9A09COLE_RFD	COLE
94	HRZ04_0227	114922	2009	1897	1	4	6	W9A09YANA	130	6	42	1	2	RFD	80096	1.766	mg/g	no barcode tag	NA	NA	80096	NA	1	1		W9A09YANA_RFD	YANA
95	HRZ06_0323	115262	2009	2622	1	4	7	W9A09YANA	249	8	126	2	4	IRR	80097	1.167	mg/g	Hurricane Dehydrator 13/10/09	NA	NA	80097	83074	1	2		W9A09YANA_IRR	YANA
96	VW2001	114904	2009	1551	1	4	8	W9A09YANA	461	6	24	1	1	IRR	80098	1.3869	mg/g	Lucerne Dehydrator 5/10 - 13/10	NA	NA	80098	NA	1	1		W9A09YANA_IRR	YANA
97	VW3457	114539	2009	1855	1	4	9	W9A09YANA	496	3	43	1	2	RFD	80099	1.4904	mg/g	Lucerne Dehydrator 5/10 - 13/10	NA	NA	80099	NA	1	1		W9A09YANA_RFD	YANA
98	VW2405	115471	2009	2294	1	4	10	W9A09YANA	474	10	79	2	3	RFD	80100	1.1429	mg/g	Lucerne Dehydrator 5/10 - 13/10	NA	NA	80100	NA	1	1		W9A09YANA_RFD	YANA
99	WW19987	117582	2009	1781	1	4	11	W9A09YANA	752	27	14	1	1	IRR	80101	1.313	mg/g	Lucerne Dehydrator 5/10 - 13/10	NA	NA	80101	82028	1	2		W9A09YANA_IRR	YANA
100	WW20469	111124	2009	84	1	4	12	W9A09COLE	768	8	4	1	1	RFD	80102	1.042	mg/g	Yanco Hurricane 22/10	NA	NA	80102	NA	1	1		W9A09COLE_RFD	COLE
101	SENTINEL	115790	2009	1646	1	4	13	W9A09YANA	347	13	14	1	1	IRR	80103	1.2847	mg/g	Lucerne Dehydrator 5/10 - 13/10	NA	NA	80103	NA	1	1		W9A09YANA_IRR	YANA
102	WW13602	110587	2009	752	1	4	14	W9A09COLE	566	3	67	2	3	IRR	80104	2.6374	mg/g	Lucerne Dehydrator 19/10	NA	NA	80104	NA	1	1		W9A09COLE_IRR	COLE
103	ATTILA	113614	2009	1390	1	4	15	W9A09COLE	25	28	94	2	4	RFD	80105	1.9622	mg/g	Lucerne Dehydrator 19/10	NA	NA	80105	NA	1	1		W9A09COLE_RFD	COLE
104	WW16259	118037	2009	2536	1	4	16	W9A09YANA	603	30	85	2	3	RFD	80106	1.1576	mg/g	Lucerne Dehydrator 5/10 - 13/10	NA	NA	80106	NA	1	1		W9A09YANA_RFD	YANA
105	WW19716	112512	2009	932	1	4	17	W9A09COLE	733	19	72	2	3	IRR	80107	2.0595	mg/g	Yanco Hurricane 19/10	NA	NA	80107	NA	1	1		W9A09COLE_IRR	COLE
106	HRZ05_0224	116086	2009	2014	1	4	18	W9A09YANA	187	15	54	1	2	RFD	80108	1.6051	mg/g	Lucerne Dehydrator 5/10 - 13/10	NA	NA	80108	NA	1	1		W9A09YANA_RFD	YANA
107	VW2782	117228	2009	2102	1	4	19	W9A09YANA	482	24	44	1	2	RFD	80109	1.2558	mg/g	Lucerne Dehydrator 5/10 - 13/10	NA	NA	80109	NA	1	1		W9A09YANA_RFD	YANA
108	LPB04_2351	116413	2009	2728	1	4	20	W9A09YANA	288	17	125	2	4	IRR	80110	1.6228	mg/g	Hurricane Dehydrator 13/10/09	NA	NA	80110	81881	1	2		W9A09YANA_IRR	YANA
109	HRZ06_0079	115760	2009	2663	1	4	21	W9A09YANA	220	12	112	2	4	IRR	80111	0.988	mg/g	Hurricane Dehydrator 13/10/09	NA	NA	80111	NA	1	1		W9A09YANA_IRR	YANA
110	VW3170	111764	2009	505	1	4	22	W9A09COLE	486	13	44	1	2	IRR	80112	1.4866	mg/g	Leeton Hurricane 20/10	NA	NA	80112	NA	1	1		W9A09COLE_IRR	COLE
111	RAC1393	115068	2009	1919	1	4	23	W9A09YANA	325	7	60	1	2	RFD	80113	1.7023	mg/g	Lucerne Dehydrator 5/10 - 13/10	NA	NA	80113	NA	1	1		W9A09YANA_RFD	YANA
112	VV2678	113238	2009	995	1	4	24	W9A09COLE	408	25	78	2	3	IRR	80114	1.8097	mg/g	Yanco Hurricane 19/10	NA	NA	80114	81442	1	2		W9A09COLE_IRR	COLE
113	WW19490	117208	2009	1759	1	4	25	W9A09YANA	704	24	24	1	1	IRR	80115	1.0719	mg/g	Lucerne Dehydrator 5/10 - 13/10	NA	NA	80115	NA	1	1		W9A09YANA_IRR	YANA
114	WW16917	117107	2009	2091	1	4	26	W9A09YANA	611	23	51	1	2	RFD	80116	1.4717	mg/g	Lucerne Dehydrator 5/10 - 13/10	NA	NA	80116	NA	1	1		W9A09YANA_RFD	YANA
115	WW13773	110895	2009	68	1	4	27	W9A09COLE	570	6	15	1	1	RFD	80117	2.1017	mg/g	Lucerne Dehydrator 20/10	NA	NA	80117	NA	1	1		W9A09COLE_RFD	COLE
116	PAVON_DWARF	114192	2009	1086	1	4	28	W9A09COLE	301	33	72	2	3	IRR	80118	1.6395	mg/g	Yanco Hurricane 19/10	NA	NA	80118	NA	1	1		W9A09COLE_IRR	COLE
117	VW2708	111651	2009	498	1	4	29	W9A09COLE	481	12	51	1	2	IRR	80119	1.8445	mg/g	Leeton Hurricane 20/10	NA	NA	80119	83034	1	2		W9A09COLE_IRR	COLE
118	GLADIUS	112026	2009	887	1	4	30	W9A09COLE	77	15	66	2	3	IRR	80120	1.7446	mg/g	Lucerne Dehydrator 19/10	NA	NA	80120	NA	1	1		W9A09COLE_IRR	COLE
119	WW19665	111758	2009	502	1	5	1	W9A09COLE	728	13	38	1	2	IRR	80121	1.7872	mg/g	Leeton Hurricane 20/10	NA	NA	80121	NA	1	1		W9A09COLE_IRR	COLE
120	CRUSADER	113926	2009	705	1	5	2	W9A09COLE	54	31	46	1	2	IRR	80122	1.691	mg/g	Leeton Hurricane 20/10	NA	NA	80122	NA	1	1		W9A09COLE_IRR	COLE
121	HRZ05_0145	112609	2009	588	1	5	3	W9A09COLE	177	20	49	1	2	IRR	80123	2.5204	mg/g	Leeton Hurricane 20/10	NA	NA	80123	NA	1	1		W9A09COLE_IRR	COLE
122	WW18784	114415	2009	1841	1	5	4	W9A09YANA	670	2	47	1	2	RFD	80124	1.8786	mg/g	Lucerne Dehydrator then Leeton Farm 13/10/09	NA	NA	80124	NA	1	1		W9A09YANA_RFD	YANA
123	HRZ06_0141	113004	2009	977	1	5	5	W9A09COLE	221	23	84	2	3	IRR	80125	2.4099	mg/g	Yanco Hurricane 19/10	NA	NA	80125	82225	1	2		W9A09COLE_IRR	COLE
124	WW19754	113941	2009	1061	1	5	6	W9A09COLE	739	31	61	2	3	IRR	80126	1.6966	mg/g	Yanco Hurricane 19/10	NA	NA	80126	NA	1	1		W9A09COLE_IRR	COLE
125	HRZ06_0141	117539	2009	2842	1	5	7	W9A09YANA	221	26	99	2	4	IRR	80127	1.893	mg/g	Hurricane Dehydrator 13/10/09	NA	NA	80127	NA	1	1		W9A09YANA_IRR	YANA
126	VW1286	112344	2009	195	1	5	8	W9A09COLE	453	18	24	1	1	RFD	80128	1.8231	mg/g	Lucerne Dehydrator 20/10	NA	NA	80128	83022	1	2		W9A09COLE_RFD	COLE
127	WAWHT2793	112508	2009	930	1	5	9	W9A09COLE	536	19	68	2	3	IRR	80129	1.2005	mg/g	Yanco Hurricane 19/10	NA	NA	80129	NA	1	1		W9A09COLE_IRR	COLE
128	HRZ06_0147	111216	2009	1176	1	5	10	W9A09COLE	224	8	96	2	4	RFD	80130	1.3565	mg/g	Lucerne Dehydrator 19/10	NA	NA	80130	NA	1	1		W9A09COLE_RFD	COLE
129	VW0395	113674	2009	684	1	5	11	W9A09COLE	428	29	34	1	2	IRR	80131	1.9846	mg/g	Leeton Hurricane 20/10	NA	NA	80131	NA	1	1		W9A09COLE_IRR	COLE
130	VW3398	115060	2009	1916	1	5	12	W9A09YANA	491	7	52	1	2	RFD	80132	1.5459	mg/g	Lucerne Dehydrator 5/10 - 13/10	NA	NA	80132	82079	1	2		W9A09YANA_RFD	YANA
131	90670_91	114769	2009	1532	1	5	13	W9A09YANA	22	5	17	1	1	IRR	80133	1.4726	mg/g	Lucerne Dehydrator 5/10 - 13/10	NA	NA	80133	NA	1	1		W9A09YANA_IRR	YANA
132	VW2782	111422	2009	828	1	5	14	W9A09COLE	482	10	62	2	3	IRR	80134	1.4307	mg/g	Lucerne Dehydrator 19/10	NA	NA	80134	NA	1	1		W9A09COLE_IRR	COLE
133	VW2410	114308	2009	2193	1	5	15	W9A09YANA	475	1	68	2	3	RFD	80135	0.50424	mg/g	Lucerne Dehydrator 5/10 - 13/10	NA	NA	80135	NA	1	1		W9A09YANA_RFD	YANA
134	VW3708	115136	2009	2615	1	5	16	W9A09YANA	506	7	128	2	4	IRR	80136	1.5294	mg/g	Hurricane Dehydrator 13/10/09	NA	NA	80136	81653	1	2		W9A09YANA_IRR	YANA
135	WW20577	112590	2009	215	1	5	17	W9A09COLE	776	20	30	1	1	RFD	80137	2.1201	mg/g	Yanco Hurricane 20/10	NA	NA	80137	NA	1	1		W9A09COLE_RFD	COLE
136	WW19733	113722	2009	1047	1	5	18	W9A09COLE	734	29	82	2	3	IRR	80138	1.3991	mg/g	Yanco Hurricane 19/10	NA	NA	80138	NA	1	1		W9A09COLE_IRR	COLE
137	BOLAC	117079	2009	1751	1	5	19	W9A09YANA	49	23	23	1	1	IRR	80139	0.55429	mg/g	Lucerne Dehydrator 5/10 - 13/10	NA	NA	80139	82113	1	2		W9A09YANA_IRR	YANA
138	VW1256	114737	2009	2588	1	5	20	W9A09YANA	451	4	113	2	4	IRR	80140	1.7567	mg/g	Hurricane Dehydrator 13/10/09	NA	NA	80140	NA	1	1		W9A09YANA_IRR	YANA
139	WW20571	112845	2009	606	1	5	21	W9A09COLE	775	22	45	1	2	IRR	80141	1.6721	mg/g	Leeton Hurricane 20/10	NA	NA	80141	NA	1	1		W9A09COLE_IRR	COLE
140	WW18830	116689	2009	1724	1	5	22	W9A09YANA	677	20	17	1	1	IRR	80142	1.0349	mg/g	Lucerne Dehydrator 5/10 - 13/10	NA	NA	80142	NA	1	1		W9A09YANA_IRR	YANA
141	CURRAWONG	114740	2009	2589	1	5	23	W9A09YANA	55	4	116	2	4	IRR	80143	0.75436	mg/g	Hurricane Dehydrator 13/10/09	NA	NA	80143	NA	1	1		W9A09YANA_IRR	YANA
142	HRZ06_0057	111298	2009	463	1	5	24	W9A09COLE	207	9	58	1	2	IRR	80144	1.7784	mg/g	Leeton Hurricane 20/10	NA	NA	80144	NA	1	1		W9A09COLE_IRR	COLE
143	WW20140	115861	2009	2330	1	5	25	W9A09YANA	755	13	85	2	3	RFD	80145	0.7395	mg/g	Lucerne Dehydrator then Leeton Farm 13/10/09	NA	NA	80145	NA	1	1		W9A09YANA_RFD	YANA
144	WW19682	115386	2009	2633	1	5	26	W9A09YANA	730	9	122	2	4	IRR	80146	1.7501	mg/g	Hurricane Dehydrator 13/10/09	NA	NA	80146	NA	1	1		W9A09YANA_IRR	YANA
145	QT13375	110564	2009	391	1	5	27	W9A09COLE	315	3	44	1	2	IRR	80147	2.1349	mg/g	Leeton Hurricane 20/10	NA	NA	80147	82629	1	2		W9A09COLE_IRR	COLE
146	WW20140	114778	2009	1536	1	5	28	W9A09YANA	755	5	26	1	1	IRR	80148	1.2912	mg/g	Lucerne Dehydrator 5/10 - 13/10	NA	NA	80148	NA	1	1		W9A09YANA_IRR	YANA
147	HRZ06_0065	117473	2009	2120	1	5	30	W9A09YANA	211	26	33	1	2	RFD	80150	1.3586	mg/g	Lucerne Dehydrator 5/10 - 13/10	NA	NA	80150	NA	1	1		W9A09YANA_RFD	YANA
148	VW1193	111054	2009	431	1	6	1	W9A09COLE	449	7	54	1	2	IRR	80151	1.1634	mg/g	Leeton Hurricane 20/10	NA	NA	80151	NA	1	1		W9A09COLE_IRR	COLE
149	HRZ05_0137	117302	2009	2821	1	6	2	W9A09YANA	174	24	118	2	4	IRR	80152	1.9123	mg/g	Hurricane Dehydrator 13/10/09	NA	NA	80152	81685	1	2		W9A09YANA_IRR	YANA
150	QT13354	114598	2009	2573	1	6	3	W9A09YANA	312	3	102	2	4	IRR	80153	1.7134	mg/g	Hurricane Dehydrator 13/10/09	NA	NA	80153	NA	1	1		W9A09YANA_IRR	YANA
151	VW1190	111826	2009	1234	1	6	4	W9A09COLE	447	13	106	2	4	RFD	80154	1.1367	mg/g	Lucerne Dehydrator 19/10	NA	NA	80154	NA	1	1		W9A09COLE_RFD	COLE
152	VW1174	117125	2009	2444	1	6	5	W9A09YANA	445	23	69	2	3	RFD	80155	0.94967	mg/g	Lucerne Dehydrator 5/10 - 13/10	NA	NA	80155	NA	1	1		W9A09YANA_RFD	YANA
153	RAC1418	116394	2009	2719	1	6	6	W9A09YANA	330	17	106	2	4	IRR	80156	1.3316	mg/g	Hurricane Dehydrator 13/10/09	NA	NA	80156	NA	1	1		W9A09YANA_IRR	YANA
154	BOLAC	114229	2009	1458	1	6	7	W9A09COLE	49	33	109	2	4	RFD	80157	1.9607	mg/g	Lucerne Dehydrator 19/10	NA	NA	80157	NA	1	1		W9A09COLE_RFD	COLE
155	GUARDIAN	115719	2009	2313	1	6	8	W9A09YANA	78	12	71	2	3	RFD	80158	0.97371	mg/g	Lucerne Dehydrator 5/10 - 13/10	NA	NA	80158	NA	1	1		W9A09YANA_RFD	YANA
156	WW18957	115941	2009	1997	1	6	9	W9A09YANA	689	14	37	1	2	RFD	80159	0.58531	mg/g	Lucerne Dehydrator then Leeton Farm 13/10/09	NA	NA	80159	81740	1	2		W9A09YANA_RFD	YANA
157	WW20664	114095	2009	1442	1	6	10	W9A09COLE	785	32	95	2	4	RFD	80160	1.563	mg/g	Lucerne Dehydrator 19/10	NA	NA	80160	NA	1	1		W9A09COLE_RFD	COLE
158	WW19750	116403	2009	2722	1	6	11	W9A09YANA	737	17	115	2	4	IRR	80161	1.3841	mg/g	Hurricane Dehydrator 13/10/09	NA	NA	80161	NA	1	1		W9A09YANA_IRR	YANA
159	VW1929	114964	2009	2246	1	6	12	W9A09YANA	459	6	84	2	3	RFD	80162	0.71344	mg/g	Lucerne Dehydrator 5/10 - 13/10	NA	NA	80162	NA	1	1		W9A09YANA_RFD	YANA
160	WI25053	116500	2009	2393	1	6	13	W9A09YANA	551	18	84	2	3	RFD	80163	0.82117	mg/g	Lucerne Dehydrator 5/10 - 13/10	NA	NA	80163	NA	1	1		W9A09YANA_RFD	YANA
161	114892_109	113235	2009	993	1	6	14	W9A09COLE	2	25	75	2	3	IRR	80164	2.2606	mg/g	Yanco Hurricane 19/10	NA	NA	80164	NA	1	1		W9A09COLE_IRR	COLE
162	WW20689	115451	2009	1956	1	6	15	W9A09YANA	791	10	59	1	2	RFD	80165	1.5255	mg/g	Lucerne Dehydrator 5/10 - 13/10	NA	NA	80165	NA	1	1	W9A08COLE	W9A09YANA_RFD	YANA
163	VW0222	111935	2009	1239	1	6	16	W9A09COLE	418	14	95	2	4	RFD	80166	1.6702	mg/g	Lucerne Dehydrator 19/10	NA	NA	80166	NA	1	1		W9A09COLE_RFD	COLE
164	AUS33662	111241	2009	96	1	6	17	W9A09COLE	37	9	1	1	1	RFD	80167	1.9036	mg/g	Lucerne Dehydrator 20/10	NA	NA	80167	82262	1	2		W9A09COLE_RFD	COLE
165	DIAMONDBIRD	114348	2009	2561	1	6	18	W9A09YANA	58	1	108	2	4	IRR	80168	1.506	mg/g	Hurricane Dehydrator 13/10/09	NA	NA	80168	NA	1	1		W9A09YANA_IRR	YANA
166	HRZ04_0421	115612	2009	2308	1	6	20	W9A09YANA	147	11	92	2	3	RFD	80170	1.2078	mg/g	Lucerne Dehydrator 5/10 - 13/10	NA	NA	80170	NA	1	1		W9A09YANA_RFD	YANA
167	VS2177	111950	2009	1248	1	6	21	W9A09COLE	381	14	110	2	4	RFD	80171	1.0167	mg/g	Lucerne Dehydrator 19/10	NA	NA	80171	82407	1	2		W9A09COLE_RFD	COLE
168	WW19201	115023	2009	1559	1	6	22	W9A09YANA	697	7	15	1	1	IRR	80172	1.2848	mg/g	Lucerne Dehydrator 13/10/09	NA	NA	80172	NA	1	1		W9A09YANA_IRR	YANA
169	7896_254	116181	2009	1689	1	6	23	W9A09YANA	16	16	21	1	1	IRR	80173	1.7171	mg/g	Lucerne Dehydrator 13/10/09	NA	NA	80173	NA	1	1		W9A09YANA_IRR	YANA
170	PEAKE	113888	2009	333	1	6	24	W9A09COLE	302	31	8	1	1	RFD	80174	1.8616	mg/g	Yanco Hurricane 20/10	NA	NA	80174	NA	1	1		W9A09COLE_RFD	COLE
171	HRZ03_0076	114258	2009	1467	1	6	25	W9A09YANA	103	1	18	1	1	IRR	80175	1.0434	mg/g	Lucerne Dehydrator 5/10 - 13/10	NA	NA	80175	83002	1	2		W9A09YANA_IRR	YANA
172	WW20256	112430	2009	1291	1	6	26	W9A09COLE	759	18	110	2	4	RFD	80176	1.152	mg/g	Lucerne Dehydrator 19/10	NA	NA	80176	NA	1	1		W9A09COLE_RFD	COLE
173	WW18830	110313	2009	367	1	6	27	W9A09COLE	677	1	33	1	2	IRR	80177	1.5461	mg/g	Leeton Hurricane 20/10	NA	NA	80177	NA	1	1		W9A09COLE_IRR	COLE
174	WW20256	114893	2009	1546	1	6	28	W9A09YANA	759	6	13	1	1	IRR	80178	1.272	mg/g	Lucerne Dehydrator 5/10 - 13/10	NA	NA	80178	83172	1	2		W9A09YANA_IRR	YANA
175	SUN570D	113496	2009	1378	1	6	29	W9A09COLE	368	27	96	2	4	RFD	80179	1.9747	mg/g	Lucerne Dehydrator 19/10	NA	NA	80179	NA	1	1		W9A09COLE_RFD	COLE
176	WW18924	114395	2009	1488	1	6	30	W9A09YANA	684	2	27	1	1	IRR	80180	1.6526	mg/g	Lucerne Dehydrator 13/10/09	NA	NA	80180	NA	1	1		W9A09YANA_IRR	YANA
177	WW21843	112039	2009	894	1	7	1	W9A09COLE	830	15	79	2	3	IRR	80181	1.7905	mg/g	Lucerne Dehydrator 19/10	NA	NA	80181	NA	1	1		W9A09COLE_IRR	COLE
178	HRZ05_0132	111285	2009	458	1	7	2	W9A09COLE	172	9	45	1	2	IRR	80182	2.2485	mg/g	Leeton Hurricane 20/10	NA	NA	80182	NA	1	1		W9A09COLE_IRR	COLE
179	SUNVALE	110301	2009	10	1	7	3	W9A09COLE	373	1	21	1	1	RFD	80183	2.2066	mg/g	Yanco Hurricane 20/10	NA	NA	80183	NA	1	1		W9A09COLE_RFD	COLE
180	HRZ04_0531	110733	2009	1129	1	7	4	W9A09COLE	156	4	93	2	4	RFD	80184	1.3676	mg/g	Lucerne Dehydrator 19/10	NA	NA	80184	81725	1	2		W9A09COLE_RFD	COLE
181	QT13359	112891	2009	1337	1	7	5	W9A09COLE	313	22	91	2	4	RFD	80185	1.6459	mg/g	Lucerne Dehydrator 19/10	NA	NA	80185	NA	1	1		W9A09COLE_RFD	COLE
182	65211_176	113556	2009	671	1	7	6	W9A09COLE	12	28	36	1	2	IRR	80186	2.1737	mg/g	Leeton Hurricane 20/10	NA	NA	80186	NA	1	1		W9A09COLE_IRR	COLE
183	WW19665	115314	2009	1940	1	7	7	W9A09YANA	728	9	50	1	2	RFD	80187	1.0474	mg/g	Lucerne Dehydrator 5/10 - 13/10	NA	NA	80187	NA	1	1		W9A09YANA_RFD	YANA
184	WW21873	111735	2009	142	1	7	8	W9A09COLE	832	13	15	1	1	RFD	80188	1.7543	mg/g	Lucerne Dehydrator 20/10	NA	NA	80188	NA	1	1		W9A09COLE_RFD	COLE
185	VW1929	110947	2009	787	1	7	9	W9A09COLE	459	6	67	2	3	IRR	80189	1.4374	mg/g	Lucerne Dehydrator 19/10	NA	NA	80189	NA	1	1		W9A09COLE_IRR	COLE
186	VW2694	117489	2009	2126	1	7	10	W9A09YANA	479	26	49	1	2	RFD	80190	1.6388	mg/g	Lucerne Dehydrator 5/10 - 13/10	NA	NA	80190	82827	1	2		W9A09YANA_RFD	YANA
187	TAMMARIN_ROCK	115613	2009	2309	1	7	11	W9A09YANA	375	11	93	2	3	RFD	80191	0.7297	mg/g	Lucerne Dehydrator 5/10 - 13/10	NA	NA	80191	NA	1	1		W9A09YANA_RFD	YANA
188	VT1020	113298	2009	278	1	7	12	W9A09COLE	382	26	18	1	1	RFD	80192	1.9034	mg/g	Yanco Hurricane 20/10	NA	NA	80192	NA	1	1		W9A09COLE_RFD	COLE
189	WW21842	113190	2009	270	1	7	13	W9A09COLE	829	25	30	1	1	RFD	80193	1.4338	mg/g	Yanco Hurricane 20/10	NA	NA	80193	81679	1	2		W9A09COLE_RFD	COLE
190	WW13735	114951	2009	2240	1	7	14	W9A09YANA	568	6	71	2	3	RFD	80194	1.5957	mg/g	Lucerne Dehydrator 5/10 - 13/10	NA	NA	80194	NA	1	1		W9A09YANA_RFD	YANA
191	334609_1	113697	2009	693	1	7	15	W9A09COLE	9	29	57	1	2	IRR	80195	1.938	mg/g	Leeton Hurricane 20/10	NA	NA	80195	NA	1	1		W9A09COLE_IRR	COLE
192	VW2067	112144	2009	896	1	7	16	W9A09COLE	462	16	64	2	3	IRR	80196	2.0553	mg/g	Lucerne Dehydrator 19/10	NA	NA	80196	NA	1	1		W9A09COLE_IRR	COLE
193	RAC1502	117956	2009	1812	1	7	17	W9A09YANA	342	30	4	1	1	IRR	80197	1.5731	mg/g	Lucerne Dehydrator 5/10 - 13/10	NA	NA	80197	NA	1	1		W9A09YANA_IRR	YANA
194	WW18569	115669	2009	1633	1	7	18	W9A09YANA	664	12	21	1	1	IRR	80198	0.93792	mg/g	Lucerne Dehydrator 5/10 - 13/10	NA	NA	80198	82565	1	2		W9A09YANA_IRR	YANA
195	VW4056	118006	2009	2178	1	7	19	W9A09YANA	514	30	54	1	2	RFD	80199	1.7964	mg/g	Lucerne Dehydrator 5/10 - 13/10	NA	NA	80199	NA	1	1		W9A09YANA_RFD	YANA
196	WW18949	116883	2009	2428	1	7	20	W9A09YANA	688	21	83	2	3	RFD	80200	0.45245	mg/g	Lucerne Dehydrator 5/10 - 13/10	NA	NA	80200	NA	1	1		W9A09YANA_RFD	YANA
197	VW1152	115995	2009	2350	1	7	21	W9A09YANA	444	14	91	2	3	RFD	80201	0.72082	mg/g	Lucerne Dehydrator 5/10 - 13/10	NA	NA	80201	NA	1	1		W9A09YANA_RFD	YANA
198	VW3457	111963	2009	160	1	7	22	W9A09COLE	496	15	3	1	1	RFD	80202	1.5188	mg/g	Lucerne Dehydrator 20/10	NA	NA	80202	NA	1	1		W9A09COLE_RFD	COLE
199	QT13390	115079	2009	2255	1	7	23	W9A09YANA	316	7	71	2	3	RFD	80203	0.98102	mg/g	Lucerne Dehydrator 5/10 - 13/10	NA	NA	80203	81947	1	2		W9A09YANA_RFD	YANA
200	HRZ04_0533	114232	2009	1459	1	7	24	W9A09COLE	158	33	112	2	4	RFD	80204	1.9238	mg/g	Lucerne Dehydrator 19/10	NA	NA	80204	NA	1	1		W9A09COLE_RFD	COLE
201	WW19632	111151	2009	435	1	7	25	W9A09COLE	719	8	31	1	2	IRR	80205	2.1157	mg/g	Leeton Hurricane 20/10	NA	NA	80205	NA	1	1		W9A09COLE_IRR	COLE
202	B1272C4	113454	2009	667	1	7	26	W9A09COLE	43	27	54	1	2	IRR	80206	1.7542	mg/g	Leeton Hurricane 20/10	NA	NA	80206	NA	1	1		W9A09COLE_IRR	COLE
203	WW16452	116536	2009	2740	1	7	27	W9A09YANA	608	18	120	2	4	IRR	80207	1.7401	mg/g	Hurricane Dehydrator 13/10/09	NA	NA	80207	NA	1	1		W9A09YANA_IRR	YANA
204	VW1498	113202	2009	637	1	7	28	W9A09COLE	455	25	42	1	2	IRR	80208	2.2433	mg/g	Leeton Hurricane 20/10	NA	NA	80208	NA	1	1		W9A09COLE_IRR	COLE
205	WW18769	111559	2009	847	1	7	29	W9A09COLE	668	11	79	2	3	IRR	80209	2.0583	mg/g	Lucerne Dehydrator 19/10	NA	NA	80209	NA	1	1		W9A09COLE_IRR	COLE
206	WW19632	112986	2009	968	1	7	30	W9A09COLE	719	23	66	2	3	IRR	80210	1.624	mg/g	Yanco Hurricane 19/10	NA	NA	80210	82464	1	2		W9A09COLE_IRR	COLE
207	VW3463	113659	2009	312	1	8	1	W9A09COLE	497	29	19	1	1	RFD	80211	1.88	mg/g	Yanco Hurricane 20/10	NA	NA	80211	82181	1	2		W9A09COLE_RFD	COLE
208	VW1256	115534	2009	1614	1	8	2	W9A09YANA	451	11	14	1	1	IRR	80212	1.3882	mg/g	Lucerne Dehydrator then Leeton Farm 13/10/09	NA	NA	80212	NA	1	1		W9A09YANA_IRR	YANA
209	DERRIMUT	114080	2009	1078	1	8	3	W9A09COLE	57	32	80	2	3	IRR	80213	1.785	mg/g	Yanco Hurricane 19/10	NA	NA	80213	NA	1	1		W9A09COLE_IRR	COLE
210	WI25099	111320	2009	824	1	8	4	W9A09COLE	557	9	80	2	3	IRR	80214	2.3027	mg/g	Lucerne Dehydrator 19/10	NA	NA	80214	NA	1	1		W9A09COLE_IRR	COLE
211	ZEBU	112087	2009	172	1	8	5	W9A09COLE	841	16	7	1	1	RFD	80215	1.5592	mg/g	Lucerne Dehydrator 20/10	NA	NA	80215	NA	1	1		W9A09COLE_RFD	COLE
212	VW1498	118053	2009	2896	1	8	6	W9A09YANA	455	30	101	2	4	IRR	80216	1.7665	mg/g	Hurricane Dehydrator 13/10/09	NA	NA	80216	82009	1	2		W9A09YANA_IRR	YANA
213	HRZ05_0101	113694	2009	691	1	8	7	W9A09COLE	161	29	54	1	2	IRR	80217	1.7391	mg/g	Leeton Hurricane 20/10	NA	NA	80217	NA	1	1		W9A09COLE_IRR	COLE
214	WW19746	116814	2009	1732	1	8	8	W9A09YANA	736	21	14	1	1	IRR	80218	1.094	mg/g	Lucerne Dehydrator 5/10 - 13/10	NA	NA	80218	NA	1	1		W9A09YANA_IRR	YANA
215	VT1020	114285	2009	1831	1	8	9	W9A09YANA	382	1	45	1	2	RFD	80219	1.1071	mg/g	Lucerne Dehydrator 5/10 - 13/10	NA	NA	80219	NA	1	1		W9A09YANA_RFD	YANA
216	WW20665	114249	2009	1464	1	8	10	W9A09YANA	786	1	9	1	1	IRR	80220	1.6736	mg/g	Lucerne Dehydrator 5/10 - 13/10	NA	NA	80220	NA	1	1		W9A09YANA_IRR	YANA
217	WW17950	115478	2009	2297	1	8	11	W9A09YANA	625	10	86	2	3	RFD	80221	0.97266	mg/g	Lucerne Dehydrator 5/10 - 13/10	NA	NA	80221	82365	1	2		W9A09YANA_RFD	YANA
218	WW18805	113067	2009	258	1	8	12	W9A09COLE	673	24	27	1	1	RFD	80222	2.0394	mg/g	Yanco Hurricane 20/10	NA	NA	80222	NA	1	1		W9A09COLE_RFD	COLE
219	WW20159	110356	2009	738	1	8	13	W9A09COLE	756	1	76	2	3	IRR	80223	1.2967	mg/g	Lucerne Dehydrator 19/10	NA	NA	80223	NA	1	1		W9A09COLE_IRR	COLE
220	HRZ05_0101	116779	2009	2758	1	8	14	W9A09YANA	161	20	107	2	4	IRR	80224	1.7201	mg/g	Hurricane Dehydrator 13/10/09	NA	NA	80224	NA	1	1		W9A09YANA_IRR	YANA
221	WW13602	114013	2009	346	1	8	15	W9A09COLE	566	32	13	1	1	RFD	80225	2.0203	mg/g	Yanco Hurricane 20/10	NA	NA	80225	82674	1	2		W9A09COLE_RFD	COLE
222	VT2474	115971	2009	2336	1	8	16	W9A09YANA	387	14	67	2	3	RFD	80226	1.4431	mg/g	Lucerne Dehydrator then Leeton Farm 13/10/09	NA	NA	80226	NA	1	1		W9A09YANA_RFD	YANA
223	VV2678	117622	2009	2142	1	8	17	W9A09YANA	408	27	54	1	2	RFD	80227	1.8513	mg/g	Lucerne Dehydrator 5/10 - 13/10	NA	NA	80227	NA	1	1		W9A09YANA_RFD	YANA
224	HRZ05_0224	116804	2009	1729	1	8	18	W9A09YANA	187	21	4	1	1	IRR	80228	1.3859	mg/g	Lucerne Dehydrator 5/10 - 13/10	NA	NA	80228	NA	1	1		W9A09YANA_IRR	YANA
225	BARHAM	111632	2009	489	1	8	19	W9A09COLE	48	12	32	1	2	IRR	80229	1.2662	mg/g	Leeton Hurricane 20/10	NA	NA	80229	NA	1	1		W9A09COLE_IRR	COLE
226	WW21687	110502	2009	1110	1	8	20	W9A09COLE	827	2	102	2	4	RFD	80230	1.2748	mg/g	Lucerne Dehydrator 19/10	NA	NA	80230	82785	1	2		W9A09COLE_RFD	COLE
227	WW3028_4	118087	2009	1823	1	8	21	W9A09YANA	834	31	7	1	1	IRR	80231	1.5992	mg/g	Lucerne Dehydrator 5/10 - 13/10	NA	NA	80231	NA	1	1		W9A09YANA_IRR	YANA
228	WAGT019	115764	2009	2664	1	8	22	W9A09YANA	523	12	116	2	4	IRR	80232	1.5217	mg/g	Hurricane Dehydrator 13/10/09	NA	NA	80232	NA	1	1		W9A09YANA_IRR	YANA
229	HRZ04_0231	115044	2009	1907	1	8	23	W9A09YANA	131	7	36	1	2	RFD	80233	2.1973	mg/g	Lucerne Dehydrator 5/10 - 13/10	NA	NA	80233	NA	1	1		W9A09YANA_RFD	YANA
230	HRZ04_0511	110932	2009	420	1	8	24	W9A09COLE	151	6	52	1	2	IRR	80234	0.55606	mg/g	Leeton Hurricane 20/10	NA	NA	80234	NA	1	1		W9A09COLE_IRR	COLE
231	WW19201	111940	2009	1242	1	8	25	W9A09COLE	697	14	100	2	4	RFD	80235	1.2196	mg/g	Lucerne Dehydrator 19/10	NA	NA	80235	NA	1	1		W9A09COLE_RFD	COLE
232	LPB04_2238	113139	2009	1353	1	8	26	W9A09COLE	284	24	99	2	4	RFD	80236	1.8331	mg/g	Lucerne Dehydrator 19/10	NA	NA	80236	82424	1	2		W9A09COLE_RFD	COLE
233	VW4368	112618	2009	590	1	8	27	W9A09COLE	521	20	58	1	2	IRR	80237	1.8093	mg/g	Leeton Hurricane 20/10	NA	NA	80237	NA	1	1		W9A09COLE_IRR	COLE
234	VW0990	110924	2009	417	1	8	28	W9A09COLE	442	6	44	1	2	IRR	80238	2.1037	mg/g	Leeton Hurricane 20/10	NA	NA	80238	NA	1	1		W9A09COLE_IRR	COLE
235	HRZ06_0145	115377	2009	2629	1	8	29	W9A09YANA	223	9	113	2	4	IRR	80239	1.9689	mg/g	Hurricane Dehydrator 13/10/09	NA	NA	80239	NA	1	1		W9A09YANA_IRR	YANA
236	HRZ04_0531	111397	2009	468	1	8	30	W9A09COLE	156	10	37	1	2	IRR	80240	1.5168	mg/g	Leeton Hurricane 20/10	NA	NA	80240	NA	1	1		W9A09COLE_IRR	COLE
237	90670_91	111821	2009	1230	1	9	1	W9A09COLE	22	13	101	2	4	RFD	80241	1.5646	mg/g	Lucerne Dehydrator 19/10	NA	NA	80241	NA	1	1		W9A09COLE_RFD	COLE
238	VT1308	112233	2009	546	1	9	2	W9A09COLE	386	17	33	1	2	IRR	80242	1.9112	mg/g	Leeton Hurricane 20/10	NA	NA	80242	82345	1	2		W9A09COLE_IRR	COLE
239	HRZ03_0076	112555	2009	1309	1	9	3	W9A09COLE	103	19	115	2	4	RFD	80243	2.5229	mg/g	Lucerne Dehydrator 19/10	NA	NA	80243	NA	1	1		W9A09COLE_RFD	COLE
240	DAKOTA	115311	2009	1939	1	9	4	W9A09YANA	56	9	47	1	2	RFD	80244	1.0915	mg/g	Lucerne Dehydrator then Leeton Farm 13/10/09	NA	NA	80244	NA	1	1		W9A09YANA_RFD	YANA
241	VW3397	115986	2009	2344	1	9	5	W9A09YANA	490	14	82	2	3	RFD	80245	1.4551	mg/g	Lucerne Dehydrator then Leeton Farm 13/10/09	NA	NA	80245	NA	1	1		W9A09YANA_RFD	YANA
242	WW21162	116665	2009	2752	1	9	6	W9A09YANA	806	19	121	2	4	IRR	80246	1.1467	mg/g	Hurricane Dehydrator 13/10/09	NA	NA	80246	NA	1	1		W9A09YANA_IRR	YANA
243	HRZ04_0513	114420	2009	1842	1	9	7	W9A09YANA	152	2	52	1	2	RFD	80247	1.637	mg/g	Lucerne Dehydrator 5/10 - 13/10	NA	NA	80247	81943	1	2		W9A09YANA_RFD	YANA
244	VW2694	114369	2009	1476	1	9	8	W9A09YANA	479	2	1	1	1	IRR	80248	1.5449	mg/g	Lucerne Dehydrator 13/10/09	NA	NA	80248	NA	1	1		W9A09YANA_IRR	YANA
245	HRZ04_0231	111160	2009	441	1	9	9	W9A09COLE	131	8	40	1	2	IRR	80249	2.3807	mg/g	Leeton Hurricane 20/10	NA	NA	80249	NA	1	1		W9A09COLE_IRR	COLE
246	WW19632	115967	2009	2004	1	9	10	W9A09YANA	719	14	63	1	2	RFD	80250	1.5954	mg/g	Lucerne Dehydrator 5/10 - 13/10	NA	NA	80250	NA	1	1		W9A09YANA_RFD	YANA
247	WW20469	117681	2009	2857	1	9	11	W9A09YANA	768	27	113	2	4	IRR	80251	1.5474	mg/g	Hurricane Dehydrator 13/10/09	NA	NA	80251	NA	1	1		W9A09YANA_IRR	YANA
248	VW3473	114896	2009	1548	1	9	12	W9A09YANA	500	6	16	1	1	IRR	80252	1.447	mg/g	Lucerne Dehydrator 5/10 - 13/10	NA	NA	80252	NA	1	1		W9A09YANA_IRR	YANA
249	SENTINEL	115872	2009	2334	1	9	13	W9A09YANA	347	13	96	2	3	RFD	80253	1.2107	mg/g	Lucerne Dehydrator 5/10 - 13/10	NA	NA	80253	82859	1	2		W9A09YANA_RFD	YANA
250	133513_133	117881	2009	2167	1	9	14	W9A09YANA	5	29	57	1	2	RFD	80254	2.1171	mg/g	Lucerne Dehydrator 5/10 - 13/10	NA	NA	80254	NA	1	1		W9A09YANA_RFD	YANA
251	B1272C4	117362	2009	2114	1	9	15	W9A09YANA	43	25	50	1	2	RFD	80255	1.121	mg/g	Lucerne Dehydrator 5/10 - 13/10	NA	NA	80255	NA	1	1		W9A09YANA_RFD	YANA
252	HRZ04_0354	113795	2009	696	1	9	16	W9A09COLE	142	30	35	1	2	IRR	80256	1.4307	mg/g	Leeton Hurricane 20/10	NA	NA	80256	NA	1	1		W9A09COLE_IRR	COLE
253	HRZ06_0145	117735	2009	2146	1	9	17	W9A09YANA	223	28	39	1	2	RFD	80257	2.0564	mg/g	Lucerne Dehydrator 5/10 - 13/10	NA	NA	80257	NA	1	1		W9A09YANA_RFD	YANA
254	VW3789	111208	2009	817	1	9	18	W9A09COLE	512	8	88	2	3	IRR	80258	1.4333	mg/g	Lucerne Dehydrator 19/10	NA	NA	80258	NA	1	1		W9A09COLE_IRR	COLE
255	GBA0608	110717	2009	765	1	9	19	W9A09COLE	73	4	77	2	3	IRR	80259	1.6121	mg/g	Yanco Hurricane 19/10	NA	NA	80259	83139	1	2		W9A09COLE_IRR	COLE
256	VW1864	116521	2009	2731	1	9	20	W9A09YANA	458	18	105	2	4	IRR	80260	1.7418	mg/g	Hurricane Dehydrator 13/10/09	NA	NA	80260	NA	1	1		W9A09YANA_IRR	YANA
257	HRZ06_2178	111201	2009	814	1	9	21	W9A09COLE	272	8	81	2	3	IRR	80261	1.6324	mg/g	Lucerne Dehydrator 19/10	NA	NA	80261	NA	1	1		W9A09COLE_IRR	COLE
258	HRZ04_0533	114343	2009	2558	1	9	22	W9A09YANA	158	1	103	2	4	IRR	80262	1.5944	mg/g	Hurricane Dehydrator 13/10/09	NA	NA	80262	83043	1	2		W9A09YANA_IRR	YANA
259	VW4326	115632	2009	2652	1	9	23	W9A09YANA	519	11	112	2	4	IRR	80263	1.255	mg/g	Hurricane Dehydrator 13/10/09	NA	NA	80263	NA	1	1		W9A09YANA_IRR	YANA
260	MCCUBBIN	112633	2009	943	1	9	24	W9A09COLE	296	20	73	2	3	IRR	80264	1.1268	mg/g	Yanco Hurricane 19/10	NA	NA	80264	NA	1	1		W9A09COLE_IRR	COLE
261	HRZ03_0062	111858	2009	153	1	9	25	W9A09COLE	98	14	18	1	1	RFD	80265	1.7949	mg/g	Lucerne Dehydrator 20/10	NA	NA	80265	NA	1	1		W9A09COLE_RFD	COLE
262	VV2321	110972	2009	1153	1	9	26	W9A09COLE	406	6	92	2	4	RFD	80266	1.3962	mg/g	Lucerne Dehydrator 19/10	NA	NA	80266	NA	1	1		W9A09COLE_RFD	COLE
263	WW19561	112584	2009	214	1	9	27	W9A09COLE	711	20	24	1	1	RFD	80267	1.1139	mg/g	Yanco Hurricane 20/10	NA	NA	80267	NA	1	1		W9A09COLE_RFD	COLE
264	VW0379	115707	2009	1978	1	9	28	W9A09YANA	425	12	59	1	2	RFD	80268	1.1701	mg/g	Lucerne Dehydrator 5/10 - 13/10	NA	NA	80268	NA	1	1		W9A09YANA_RFD	YANA
265	LINCOLN	115375	2009	2627	1	9	29	W9A09YANA	280	9	111	2	4	IRR	80269	1.2994	mg/g	Hurricane Dehydrator 13/10/09	NA	NA	80269	80757	1	2		W9A09YANA_IRR	YANA
266	WW20406	111040	2009	426	1	9	30	W9A09COLE	767	7	40	1	2	IRR	80270	1.4141	mg/g	Leeton Hurricane 20/10	NA	NA	80270	NA	1	1		W9A09COLE_IRR	COLE
267	WW14314	116858	2009	2073	1	10	1	W9A09YANA	582	21	58	1	2	RFD	80271	1.3948	mg/g	Lucerne Dehydrator then Leeton Farm 13/10/09	NA	NA	80271	NA	1	1		W9A09YANA_RFD	YANA
268	VW0241	114246	2009	1462	1	10	2	W9A09YANA	419	1	6	1	1	IRR	80272	1.3047	mg/g	Lucerne Dehydrator 5/10 - 13/10	NA	NA	80272	NA	1	1		W9A09YANA_IRR	YANA
269	SUN570D	117969	2009	1816	1	10	3	W9A09YANA	368	30	17	1	1	IRR	80273	1.295	mg/g	Lucerne Dehydrator 5/10 - 13/10	NA	NA	80273	82473	1	2		W9A09YANA_IRR	YANA
270	LPB04_2386_1303	116128	2009	2362	1	10	4	W9A09YANA	292	15	96	2	3	RFD	80274	1.9391	mg/g	Lucerne Dehydrator then Leeton Farm 13/10/09	NA	NA	80274	NA	1	1		W9A09YANA_RFD	YANA
271	WW18049	113079	2009	627	1	10	5	W9A09COLE	626	24	39	1	2	IRR	80275	1.1965	mg/g	Leeton Hurricane 20/10	NA	NA	80275	81823	1	2		W9A09COLE_IRR	COLE
272	VW0395	114286	2009	1832	1	10	6	W9A09YANA	428	1	46	1	2	RFD	80276	1.2865	mg/g	Lucerne Dehydrator 5/10 - 13/10	NA	NA	80276	NA	1	1		W9A09YANA_RFD	YANA
273	7896_254	116914	2009	2781	1	10	7	W9A09YANA	16	21	114	2	4	IRR	80277	1.8875	mg/g	Hurricane Dehydrator 13/10/09	NA	NA	80277	NA	1	1		W9A09YANA_IRR	YANA
274	HRZ03_0005	113883	2009	330	1	10	8	W9A09COLE	88	31	3	1	1	RFD	80278	2.186	mg/g	Yanco Hurricane 20/10	NA	NA	80278	NA	1	1		W9A09COLE_RFD	COLE
275	WW16367	110551	2009	388	1	10	9	W9A09COLE	604	3	31	1	2	IRR	80279	1.389	mg/g	Leeton Hurricane 20/10	NA	NA	80279	NA	1	1		W9A09COLE_IRR	COLE
276	WW20484	112009	2009	532	1	10	10	W9A09COLE	769	15	49	1	2	IRR	80280	1.1656	mg/g	Leeton Hurricane 20/10	NA	NA	80280	82319	1	2		W9A09COLE_IRR	COLE
277	ROSELLA	111434	2009	835	1	10	11	W9A09COLE	346	10	74	2	3	IRR	80281	0.43693	mg/g	Lucerne Dehydrator 19/10	NA	NA	80281	NA	1	1		W9A09COLE_IRR	COLE
278	HRZ03_0061	115346	2009	2282	1	10	12	W9A09YANA	97	9	82	2	3	RFD	80282	1.0902	mg/g	Lucerne Dehydrator 5/10 - 13/10	NA	NA	80282	NA	1	1		W9A09YANA_RFD	YANA
279	HRZ06_0143	114181	2009	1082	1	10	13	W9A09COLE	222	33	61	2	3	IRR	80283	1.8448	mg/g	Yanco Hurricane 19/10	NA	NA	80283	NA	1	1		W9A09COLE_IRR	COLE
280	VV3277	111345	2009	1187	1	10	14	W9A09COLE	412	9	105	2	4	RFD	80284	1.1754	mg/g	Lucerne Dehydrator 19/10	NA	NA	80284	80508	1	2		W9A09COLE_RFD	COLE
281	VW3457	117391	2009	2473	1	10	15	W9A09YANA	496	25	79	2	3	RFD	80285	0.99764	mg/g	Lucerne Dehydrator then Leeton Farm 13/10/09	NA	NA	80285	NA	1	1		W9A09YANA_RFD	YANA
282	WW14309	110468	2009	746	1	10	16	W9A09COLE	580	2	68	2	3	IRR	80286	1.9414	mg/g	Lucerne Dehydrator 19/10	NA	NA	80286	NA	1	1		W9A09COLE_IRR	COLE
283	WW13710	115586	2009	2299	1	10	17	W9A09YANA	567	11	66	2	3	RFD	80287	1.0448	mg/g	Lucerne Dehydrator 5/10 - 13/10	NA	NA	80287	82840	1	2		W9A09YANA_RFD	YANA
284	JANZ	115299	2009	1934	1	10	18	W9A09YANA	278	9	35	1	2	RFD	80288	1.1695	mg/g	Lucerne Dehydrator 5/10 - 13/10	NA	NA	80288	NA	1	1		W9A09YANA_RFD	YANA
285	WW21873	115779	2009	1641	1	10	19	W9A09YANA	832	13	3	1	1	IRR	80289	1.2468	mg/g	Lucerne Dehydrator 5/10 - 13/10	NA	NA	80289	NA	1	1		W9A09YANA_IRR	YANA
286	VW3717	117035	2009	2792	1	10	20	W9A09YANA	509	22	107	2	4	IRR	80290	1.4717	mg/g	Hurricane Dehydrator 13/10/09	NA	NA	80290	NA	1	1		W9A09YANA_IRR	YANA
287	HRZ06_2202	110612	2009	1116	1	10	21	W9A09COLE	274	3	92	2	4	RFD	80291	1.0796	mg/g	Lucerne Dehydrator 19/10	NA	NA	80291	NA	1	1		W9A09COLE_RFD	COLE
288	HRZ04_0188	116904	2009	2776	1	10	22	W9A09YANA	121	21	104	2	4	IRR	80292	1.6557	mg/g	Hurricane Dehydrator 13/10/09	NA	NA	80292	NA	1	1		W9A09YANA_IRR	YANA
289	HRZ06_0004	111137	2009	88	1	10	23	W9A09COLE	190	8	17	1	1	RFD	80293	2.0685	mg/g	Lucerne Dehydrator 20/10	NA	NA	80293	NA	1	1		W9A09COLE_RFD	COLE
290	WW18805	116744	2009	2415	1	10	24	W9A09YANA	673	20	72	2	3	RFD	80294	1.0673	mg/g	Lucerne Dehydrator then Leeton Farm 13/10/09	NA	NA	80294	83179	1	2		W9A09YANA_RFD	YANA
291	WAWHT3016	112431	2009	1292	1	10	25	W9A09COLE	545	18	111	2	4	RFD	80295	1.5414	mg/g	Lucerne Dehydrator 19/10	NA	NA	80295	NA	1	1		W9A09COLE_RFD	COLE
292	WW19565	112225	2009	186	1	10	26	W9A09COLE	714	17	25	1	1	RFD	80296	1.7278	mg/g	Lucerne Dehydrator 20/10	NA	NA	80296	NA	1	1		W9A09COLE_RFD	COLE
293	VW3466	116132	2009	2688	1	10	27	W9A09YANA	498	15	100	2	4	IRR	80297	1.7068	mg/g	Hurricane Dehydrator 13/10/09	NA	NA	80297	82174	1	2		W9A09YANA_IRR	YANA
294	VW3707	117236	2009	2104	1	10	28	W9A09YANA	505	24	52	1	2	RFD	80298	0.94843	mg/g	Lucerne Dehydrator 5/10 - 13/10	NA	NA	80298	NA	1	1		W9A09YANA_RFD	YANA
295	LPB04_2386_1303	116041	2009	1672	1	10	29	W9A09YANA	292	15	9	1	1	IRR	80299	1.4341	mg/g	Lucerne Dehydrator 13/10/09	NA	NA	80299	NA	1	1		W9A09YANA_IRR	YANA
296	WW16452	111391	2009	465	1	10	30	W9A09COLE	608	10	31	1	2	IRR	80300	1.4201	mg/g	Leeton Hurricane 20/10	NA	NA	80300	NA	1	1		W9A09COLE_IRR	COLE
297	LANG	114858	2009	2592	2	1	1	W9A09YANA	279	5	106	2	4	IRR	80301	1.4626	mg/g	Hurricane Dehydrator 13/10/09	NA	NA	80301	NA	1	1		W9A09YANA_IRR	YANA
298	WW19866	115672	2009	1635	2	1	2	W9A09YANA	742	12	24	1	1	IRR	80302	1.3871	mg/g	Hurricane Dehydrator 13/10/09	NA	NA	80302	NA	1	1		W9A09YANA_IRR	YANA
299	WW19684	112997	2009	974	2	1	3	W9A09COLE	731	23	77	2	3	IRR	80303	1.8521	mg/g	Yanco Hurricane 19/10	NA	NA	80303	NA	1	1		W9A09COLE_IRR	COLE
300	VW3405	112681	2009	216	2	1	4	W9A09COLE	494	21	1	1	1	RFD	80304	1.6687	mg/g	Yanco Hurricane 20/10	NA	NA	80304	82872	1	2		W9A09COLE_RFD	COLE
301	WW19492	116019	2009	2684	2	1	5	W9A09YANA	705	14	115	2	4	IRR	80305	1.6616	mg/g	Hurricane Dehydrator 13/10/09	NA	NA	80305	NA	1	1		W9A09YANA_IRR	YANA
302	VW2410	117850	2009	1806	2	1	6	W9A09YANA	475	29	26	1	1	IRR	80306	1.08	mg/g	Lucerne Dehydrator 5/10 - 13/10	NA	NA	80306	NA	1	1		W9A09YANA_IRR	YANA
303	WW20665	113081	2009	628	2	1	7	W9A09COLE	786	24	41	1	2	IRR	80307	1.5958	mg/g	Leeton Hurricane 20/10	NA	NA	80307	NA	1	1		W9A09COLE_IRR	COLE
304	WW16917	111062	2009	797	2	1	8	W9A09COLE	611	7	62	2	3	IRR	80308	1.9484	mg/g	Lucerne Dehydrator 19/10	NA	NA	80308	81805	1	2		W9A09COLE_IRR	COLE
305	VW0398	117684	2009	2858	2	1	9	W9A09YANA	429	27	116	2	4	IRR	80309	1.4978	mg/g	Hurricane Dehydrator 13/10/09	NA	NA	80309	NA	1	1		W9A09YANA_IRR	YANA
306	DIAMONDBIRD	114442	2009	2201	2	1	10	W9A09YANA	58	2	74	2	3	RFD	80310	1.3434	mg/g	Lucerne Dehydrator 5/10 - 13/10	NA	NA	80310	NA	1	1		W9A09YANA_RFD	YANA
307	VQ2791	113046	2009	249	2	1	11	W9A09COLE	378	24	6	1	1	RFD	80311	1.7073	mg/g	Yanco Hurricane 20/10	NA	NA	80311	82626	1	2		W9A09COLE_RFD	COLE
308	HRZ05_0145	115912	2009	1658	2	1	12	W9A09YANA	177	14	8	1	1	IRR	80312	1.6955	mg/g	Lucerne Dehydrator 5/10 - 13/10	NA	NA	80312	83244	1	2		W9A09YANA_IRR	YANA
309	WAGT023	112461	2009	203	2	1	13	W9A09COLE	526	19	21	1	1	RFD	80313	1.9145	mg/g	Lucerne Dehydrator 20/10	NA	NA	80313	NA	1	1		W9A09COLE_RFD	COLE
310	VW0990	112793	2009	1333	2	1	14	W9A09COLE	442	21	113	2	4	RFD	80314	1.3552	mg/g	Lucerne Dehydrator 19/10	NA	NA	80314	NA	1	1		W9A09COLE_RFD	COLE
311	VW0241	112531	2009	1294	2	1	15	W9A09COLE	419	19	91	2	4	RFD	80315	1.9639	mg/g	Lucerne Dehydrator 19/10	NA	NA	80315	NA	1	1		W9A09COLE_RFD	COLE
312	HRZ04_0154	114399	2009	1491	2	1	16	W9A09YANA	115	2	31	1	1	IRR	80316	1.8212	mg/g	Lucerne Dehydrator 13/10/09	NA	NA	80316	83089	1	2		W9A09YANA_IRR	YANA
313	EGA_EAGLEHAWK	112652	2009	1310	2	1	17	W9A09COLE	61	20	92	2	4	RFD	80317	2.0745	mg/g	Lucerne Dehydrator 19/10	NA	NA	80317	NA	1	1		W9A09COLE_RFD	COLE
314	QT13375	111907	2009	877	2	1	18	W9A09COLE	315	14	67	2	3	IRR	80318	1.4598	mg/g	Lucerne Dehydrator 19/10	NA	NA	80318	NA	1	1		W9A09COLE_IRR	COLE
315	HRZ05_0130	115825	2009	1988	2	1	19	W9A09YANA	170	13	49	1	2	RFD	80319	1.556	mg/g	Lucerne Dehydrator 5/10 - 13/10	NA	NA	80319	NA	1	1		W9A09YANA_RFD	YANA
316	WW16367	115724	2009	2314	2	1	20	W9A09YANA	604	12	76	2	3	RFD	80320	1.3608	mg/g	Lucerne Dehydrator 5/10 - 13/10	NA	NA	80320	NA	1	1		W9A09YANA_RFD	YANA
317	WW19826	112896	2009	1339	2	1	21	W9A09COLE	740	22	96	2	4	RFD	80321	1.499	mg/g	Lucerne Dehydrator 19/10	NA	NA	80321	81721	1	2		W9A09COLE_RFD	COLE
318	EGA_GREGORY	116916	2009	2782	2	1	22	W9A09YANA	62	21	116	2	4	IRR	80322	1.1718	mg/g	Hurricane Dehydrator 13/10/09	NA	NA	80322	NA	1	1		W9A09YANA_IRR	YANA
319	WW20214	114520	2009	1504	2	1	23	W9A09YANA	758	3	24	1	1	IRR	80323	1.2555	mg/g	Lucerne Dehydrator 13/10/09	NA	NA	80323	NA	1	1		W9A09YANA_IRR	YANA
320	CURRAWONG	111176	2009	449	2	1	24	W9A09COLE	55	8	56	1	2	IRR	80324	0.74569	mg/g	Leeton Hurricane 20/10	NA	NA	80324	NA	1	1	Emu damage	W9A09COLE_IRR	COLE
321	VW3397	116962	2009	2076	2	1	25	W9A09YANA	490	22	34	1	2	RFD	80325	1.4578	mg/g	Lucerne Dehydrator 5/10 - 13/10	NA	NA	80325	82209	1	2		W9A09YANA_RFD	YANA
322	VW3463	111704	2009	1217	2	1	26	W9A09COLE	497	12	104	2	4	RFD	80326	1.1444	mg/g	Lucerne Dehydrator 19/10	NA	NA	80326	NA	1	1		W9A09COLE_RFD	COLE
323	WW19864	113849	2009	1059	2	1	27	W9A09COLE	741	30	89	2	3	IRR	80327	2.7059	mg/g	Yanco Hurricane 19/10	NA	NA	80327	NA	1	1		W9A09COLE_IRR	COLE
324	WW21859	116097	2009	2352	2	1	28	W9A09YANA	831	15	65	2	3	RFD	80328	0.91186	mg/g	Lucerne Dehydrator then Leeton Farm 13/10/09	NA	NA	80328	NA	1	1		W9A09YANA_RFD	YANA
325	WW19663	111885	2009	520	2	1	29	W9A09COLE	727	14	45	1	2	IRR	80329	2.2232	mg/g	Leeton Hurricane 20/10	NA	NA	80329	NA	1	1		W9A09COLE_IRR	COLE
326	CURRAWONG	111582	2009	1206	2	1	30	W9A09COLE	55	11	102	2	4	RFD	80330	1.6909	mg/g	Lucerne Dehydrator 19/10	NA	NA	80330	NA	1	1		W9A09COLE_RFD	COLE
327	WW19514	111597	2009	1211	2	2	1	W9A09COLE	708	11	117	2	4	RFD	80331	1.6321	mg/g	Lucerne Dehydrator 19/10	NA	NA	80331	NA	1	1		W9A09COLE_RFD	COLE
328	VW0404	110351	2009	735	2	2	2	W9A09COLE	432	1	71	2	3	IRR	80332	1.3989	mg/g	Yanco Hurricane 19/10	NA	NA	80332	83252	1	2		W9A09COLE_IRR	COLE
329	HRZ03_0061	112506	2009	929	2	2	3	W9A09COLE	97	19	66	2	3	IRR	80333	2.0774	mg/g	Yanco Hurricane 19/10	NA	NA	80333	NA	1	1		W9A09COLE_IRR	COLE
330	WW17062	111831	2009	1236	2	2	4	W9A09COLE	612	13	111	2	4	RFD	80334	1.2055	mg/g	Lucerne Dehydrator 19/10	NA	NA	80334	NA	1	1		W9A09COLE_RFD	COLE
331	WW18830	111829	2009	1235	2	2	5	W9A09COLE	677	13	109	2	4	RFD	80335	0.98669	mg/g	Lucerne Dehydrator 19/10	NA	NA	80335	NA	1	1		W9A09COLE_RFD	COLE
332	WAGT033	116405	2009	2723	2	2	7	W9A09YANA	530	17	117	2	4	IRR	80337	2.2027	mg/g	Hurricane Dehydrator 13/10/09	NA	NA	80337	NA	1	1		W9A09YANA_IRR	YANA
333	VW1190	116476	2009	2041	2	2	8	W9A09YANA	447	18	60	1	2	RFD	80338	1.1012	mg/g	Lucerne Dehydrator 5/10 - 13/10	NA	NA	80338	NA	1	1		W9A09YANA_RFD	YANA
334	VW2001	113141	2009	1354	2	2	9	W9A09COLE	461	24	101	2	4	RFD	80339	1.5432	mg/g	Lucerne Dehydrator 19/10	NA	NA	80339	82507	1	2		W9A09COLE_RFD	COLE
335	SUN559A	117361	2009	2113	2	2	10	W9A09YANA	364	25	49	1	2	RFD	80340	1.3457	mg/g	Lucerne Dehydrator 5/10 - 13/10	NA	NA	80340	NA	1	1		W9A09YANA_RFD	YANA
336	VW4192	111875	2009	515	2	2	11	W9A09COLE	518	14	35	1	2	IRR	80341	1.8601	mg/g	Leeton Hurricane 20/10	NA	NA	80341	NA	1	1		W9A09COLE_IRR	COLE
337	133513_133	113730	2009	1050	2	2	12	W9A09COLE	5	29	90	2	3	IRR	80342	2.8446	mg/g	Yanco Hurricane 19/10	NA	NA	80342	NA	1	1		W9A09COLE_IRR	COLE
338	VW0644	114824	2009	2233	2	2	13	W9A09YANA	433	5	72	2	3	RFD	80343	1.0265	mg/g	Lucerne Dehydrator 5/10 - 13/10	NA	NA	80343	NA	1	1		W9A09YANA_RFD	YANA
339	133513_133	111368	2009	108	2	2	14	W9A09COLE	5	10	8	1	1	RFD	80344	2.5222	mg/g	Lucerne Dehydrator 20/10	NA	NA	80344	NA	1	1		W9A09COLE_RFD	COLE
340	WW19891	114599	2009	2574	2	2	15	W9A09YANA	746	3	103	2	4	IRR	80345	2.077	mg/g	Hurricane Dehydrator 13/10/09	NA	NA	80345	NA	1	1		W9A09YANA_IRR	YANA
341	WW19866	110838	2009	780	2	2	16	W9A09COLE	742	5	78	2	3	IRR	80346	1.4627	mg/g	Lucerne Dehydrator 19/10	NA	NA	80346	NA	1	1		W9A09COLE_IRR	COLE
342	HRZ06_0034	114091	2009	1440	2	2	17	W9A09COLE	193	32	91	2	4	RFD	80347	1.8627	mg/g	Lucerne Dehydrator 19/10	NA	NA	80347	NA	1	1		W9A09COLE_RFD	COLE
343	EGA_JAEGER	116918	2009	2783	2	2	18	W9A09YANA	63	21	118	2	4	IRR	80348	1.9166	mg/g	Hurricane Dehydrator 13/10/09	NA	NA	80348	81703	1	2		W9A09YANA_IRR	YANA
344	QT13626	116579	2009	2042	2	2	19	W9A09YANA	320	19	35	1	2	RFD	80349	1.6809	mg/g	Lucerne Dehydrator 5/10 - 13/10	NA	NA	80349	NA	1	1		W9A09YANA_RFD	YANA
345	HRZ06_0514	113041	2009	245	2	2	20	W9A09COLE	257	24	1	1	1	RFD	80350	2.0877	mg/g	Yanco Hurricane 20/10	NA	NA	80350	NA	1	1		W9A09COLE_RFD	COLE
346	YENDA	117661	2009	2501	2	2	21	W9A09YANA	840	27	93	2	3	RFD	80351	1.1293	mg/g	Lucerne Dehydrator then Leeton Farm 13/10/09	NA	NA	80351	NA	1	1		W9A09YANA_RFD	YANA
347	HRZ06_0053	117258	2009	2459	2	2	22	W9A09YANA	205	24	74	2	3	RFD	80352	1.2598	mg/g	Lucerne Dehydrator then Leeton Farm 13/10/09	NA	NA	80352	NA	1	1		W9A09YANA_RFD	YANA
348	WW19662	115115	2009	2608	2	2	23	W9A09YANA	726	7	107	2	4	IRR	80353	1.612	mg/g	Hurricane Dehydrator 13/10/09	NA	NA	80353	NA	1	1		W9A09YANA_IRR	YANA
349	WAGT023	110731	2009	1127	2	2	24	W9A09COLE	526	4	91	2	4	RFD	80354	1.7632	mg/g	Lucerne Dehydrator 19/10	NA	NA	80354	NA	1	1		W9A09COLE_RFD	COLE
350	HRZ05_0130	113121	2009	985	2	2	25	W9A09COLE	170	24	81	2	3	IRR	80355	1.7297	mg/g	Yanco Hurricane 19/10	NA	NA	80355	NA	1	1		W9A09COLE_IRR	COLE
351	WW20571	113427	2009	295	2	2	26	W9A09COLE	775	27	27	1	1	RFD	80356	1.7719	mg/g	Yanco Hurricane 20/10	NA	NA	80356	81899	1	2		W9A09COLE_RFD	COLE
352	VW3708	112600	2009	584	2	2	27	W9A09COLE	506	20	40	1	2	IRR	80357	1.0998	mg/g	Leeton Hurricane 20/10	NA	NA	80357	NA	1	1		W9A09COLE_IRR	COLE
353	HRZ04_0513	110438	2009	382	2	2	28	W9A09COLE	152	2	38	1	2	IRR	80358	1.4808	mg/g	Leeton Hurricane 20/10	NA	NA	80358	NA	1	1		W9A09COLE_IRR	COLE
354	SUNBRI	112976	2009	623	2	2	29	W9A09COLE	372	23	56	1	2	IRR	80359	1.5719	mg/g	Leeton Hurricane 20/10	NA	NA	80359	NA	1	1		W9A09COLE_IRR	COLE
355	7896_254	115857	2009	2327	2	2	30	W9A09YANA	16	13	81	2	3	RFD	80360	1.1578	mg/g	Lucerne Dehydrator 5/10 - 13/10	NA	NA	80360	82093	1	2		W9A09YANA_RFD	YANA
356	HRZ06_0319	111072	2009	803	2	3	1	W9A09COLE	246	7	72	2	3	IRR	80361	2.2222	mg/g	Lucerne Dehydrator 19/10	NA	NA	80361	NA	1	1		W9A09COLE_IRR	COLE
357	RAC1505	116414	2009	2729	2	3	2	W9A09YANA	344	17	126	2	4	IRR	80362	1.8582	mg/g	Hurricane Dehydrator 13/10/09	NA	NA	80362	NA	1	1		W9A09YANA_IRR	YANA
358	EGA_STAMPEDE	116183	2009	1690	2	3	3	W9A09YANA	64	16	23	1	1	IRR	80363	1.3876	mg/g	Lucerne Dehydrator 13/10/09	NA	NA	80363	82389	1	2		W9A09YANA_IRR	YANA
359	RAC1502	112859	2009	615	2	3	4	W9A09COLE	342	22	59	1	2	IRR	80364	2.3903	mg/g	Leeton Hurricane 20/10	NA	NA	80364	NA	1	1		W9A09COLE_IRR	COLE
360	WW16367	113420	2009	292	2	3	5	W9A09COLE	604	27	20	1	1	RFD	80365	2.3286	mg/g	Yanco Hurricane 20/10	NA	NA	80365	NA	1	1		W9A09COLE_RFD	COLE
361	WW20068	112936	2009	241	2	3	6	W9A09COLE	753	23	16	1	1	RFD	80366	1.8745	mg/g	Yanco Hurricane 20/10	NA	NA	80366	NA	1	1		W9A09COLE_RFD	COLE
362	AXE	114953	2009	2241	2	3	7	W9A09YANA	40	6	73	2	3	RFD	80367	0.60572	mg/g	Lucerne Dehydrator 5/10 - 13/10	NA	NA	80367	82215	1	2		W9A09YANA_RFD	YANA
363	VW3595	117552	2009	2849	2	3	8	W9A09YANA	503	26	112	2	4	IRR	80368	1.302	mg/g	Hurricane Dehydrator 13/10/09	NA	NA	80368	NA	1	1		W9A09YANA_IRR	YANA
364	SUN525D	115308	2009	1937	2	3	9	W9A09YANA	354	9	44	1	2	RFD	80369	1.1628	mg/g	Lucerne Dehydrator then Leeton Farm 13/10/09	NA	NA	80369	NA	1	1		W9A09YANA_RFD	YANA
365	VW0318	115062	2009	1917	2	3	10	W9A09YANA	423	7	54	1	2	RFD	80370	1.7749	mg/g	Lucerne Dehydrator 5/10 - 13/10	NA	NA	80370	NA	1	1		W9A09YANA_RFD	YANA
366	WI25099	112320	2009	1282	2	3	11	W9A09COLE	557	17	120	2	4	RFD	80371	0.92315	mg/g	Lucerne Dehydrator 19/10	NA	NA	80371	NA	1	1		W9A09COLE_RFD	COLE
367	PEAKE	110758	2009	1140	2	3	12	W9A09COLE	302	4	118	2	4	RFD	80372	1.1877	mg/g	Lucerne Dehydrator 19/10	NA	NA	80372	NA	1	1		W9A09COLE_RFD	COLE
368	WW18949	112608	2009	587	2	3	13	W9A09COLE	688	20	48	1	2	IRR	80373	1.5817	mg/g	Leeton Hurricane 20/10	NA	NA	80373	82402	1	2		W9A09COLE_IRR	COLE
369	VW4326	112157	2009	902	2	3	14	W9A09COLE	519	16	77	2	3	IRR	80374	2.0009	mg/g	Yanco Hurricane 19/10	NA	NA	80374	NA	1	1		W9A09COLE_IRR	COLE
370	WW19826	114294	2009	1834	2	3	15	W9A09YANA	740	1	54	1	2	RFD	80375	1.3793	mg/g	Lucerne Dehydrator 5/10 - 13/10	NA	NA	80375	NA	1	1		W9A09YANA_RFD	YANA
371	VW3457	118058	2009	2900	2	3	16	W9A09YANA	496	30	106	2	4	IRR	80376	1.8398	mg/g	Hurricane Dehydrator 13/10/09	NA	NA	80376	NA	1	1		W9A09YANA_IRR	YANA
372	WW14072	113789	2009	328	2	3	17	W9A09COLE	572	30	29	1	1	RFD	80377	1.6449	mg/g	Yanco Hurricane 20/10	NA	NA	80377	83137	1	2		W9A09COLE_RFD	COLE
373	VW4192	111116	2009	1174	2	3	18	W9A09COLE	518	7	116	2	4	RFD	80378	1.5324	mg/g	Lucerne Dehydrator 19/10	NA	NA	80378	NA	1	1		W9A09COLE_RFD	COLE
374	VT1308	116368	2009	2377	2	3	19	W9A09YANA	386	17	80	2	3	RFD	80379	1.5885	mg/g	Lucerne Dehydrator 5/10 - 13/10	NA	NA	80379	NA	1	1		W9A09YANA_RFD	YANA
375	DIAMONDBIRD	112397	2009	923	2	3	20	W9A09COLE	58	18	77	2	3	IRR	80380	1.7094	mg/g	Yanco Hurricane 19/10	NA	NA	80380	NA	1	1		W9A09COLE_IRR	COLE
376	HRZ06_0079	115138	2009	1568	2	3	21	W9A09YANA	220	8	2	1	1	IRR	80381	0.98371	mg/g	Lucerne Dehydrator 5/10 - 13/10	NA	NA	80381	NA	1	1		W9A09YANA_IRR	YANA
377	65211_176	111915	2009	880	2	3	22	W9A09COLE	12	14	75	2	3	IRR	80382	2.195	mg/g	Lucerne Dehydrator 19/10	NA	NA	80382	82248	1	2		W9A09COLE_IRR	COLE
378	WW20469	114223	2009	1454	2	3	23	W9A09COLE	768	33	103	2	4	RFD	80383	2.0397	mg/g	Lucerne Dehydrator 19/10	NA	NA	80383	NA	1	1		W9A09COLE_RFD	COLE
379	DERRIMUT	115197	2009	1931	2	3	24	W9A09YANA	57	8	61	1	2	RFD	80384	1.1374	mg/g	Lucerne Dehydrator 5/10 - 13/10	NA	NA	80384	NA	1	1		W9A09YANA_RFD	YANA
380	VW3457	112833	2009	597	2	3	25	W9A09COLE	496	22	33	1	2	IRR	80385	1.5957	mg/g	Leeton Hurricane 20/10	NA	NA	80385	NA	1	1		W9A09COLE_IRR	COLE
381	VW2782	115149	2009	1574	2	3	26	W9A09YANA	482	8	13	1	1	IRR	80386	1.5908	mg/g	Lucerne Dehydrator 13/10/09	NA	NA	80386	NA	1	1		W9A09YANA_IRR	YANA
382	WW19746	110385	2009	1101	2	3	27	W9A09COLE	736	1	105	2	4	RFD	80387	1.0153	mg/g	Lucerne Dehydrator 19/10	NA	NA	80387	NA	1	1		W9A09COLE_RFD	COLE
383	HRZ06_2087	114226	2009	1455	2	3	28	W9A09COLE	266	33	106	2	4	RFD	80388	1.8093	mg/g	Lucerne Dehydrator 19/10	NA	NA	80388	82543	1	2		W9A09COLE_RFD	COLE
384	HRZ05_0101	114796	2009	1883	2	3	29	W9A09YANA	161	5	44	1	2	RFD	80389	1.2403	mg/g	Lucerne Dehydrator 5/10 - 13/10	NA	NA	80389	NA	1	1		W9A09YANA_RFD	YANA
385	WW18784	116866	2009	2423	2	3	30	W9A09YANA	670	21	66	2	3	RFD	80390	1.4972	mg/g	Lucerne Dehydrator 5/10 - 13/10	NA	NA	80390	NA	1	1		W9A09YANA_RFD	YANA
386	VW0779	111190	2009	811	2	4	1	W9A09COLE	437	8	70	2	3	IRR	80391	2.1321	mg/g	Lucerne Dehydrator 19/10	NA	NA	80391	NA	1	1		W9A09COLE_IRR	COLE
387	HRZ06_0055	118136	2009	2189	2	4	2	W9A09YANA	206	31	56	1	2	RFD	80392	1.7857	mg/g	Lucerne Dehydrator 5/10 - 13/10	NA	NA	80392	NA	1	1		W9A09YANA_RFD	YANA
388	WW20664	112840	2009	602	2	4	3	W9A09COLE	785	22	40	1	2	IRR	80393	1.7605	mg/g	Leeton Hurricane 20/10	NA	NA	80393	NA	1	1		W9A09COLE_IRR	COLE
389	QT13390	114018	2009	349	2	4	4	W9A09COLE	316	32	18	1	1	RFD	80394	1.6611	mg/g	Yanco Hurricane 20/10	NA	NA	80394	NA	1	1		W9A09COLE_RFD	COLE
390	VT1020	116769	2009	2755	2	4	5	W9A09YANA	382	20	97	2	4	IRR	80395	1.2252	mg/g	Hurricane Dehydrator 13/10/09	NA	NA	80395	82435	1	2		W9A09YANA_IRR	YANA
391	SUN534D	111972	2009	163	2	4	6	W9A09COLE	359	15	12	1	1	RFD	80396	1.8089	mg/g	Lucerne Dehydrator 20/10	NA	NA	80396	NA	1	1		W9A09COLE_RFD	COLE
392	VQ2791	117614	2009	2140	2	4	7	W9A09YANA	378	27	46	1	2	RFD	80397	0.90552	mg/g	Lucerne Dehydrator 5/10 - 13/10	NA	NA	80397	NA	1	1		W9A09YANA_RFD	YANA
393	LANG	116717	2009	2062	2	4	8	W9A09YANA	279	20	45	1	2	RFD	80398	0.80821	mg/g	Lucerne Dehydrator 5/10 - 13/10	NA	NA	80398	83056	1	2		W9A09YANA_RFD	YANA
394	WW19864	113669	2009	315	2	4	9	W9A09COLE	741	29	29	1	1	RFD	80399	2.0535	mg/g	Yanco Hurricane 20/10	NA	NA	80399	NA	1	1		W9A09COLE_RFD	COLE
395	VW3717	112341	2009	194	2	4	10	W9A09COLE	509	18	21	1	1	RFD	80400	0.72183	mg/g	Lucerne Dehydrator 20/10	NA	NA	80400	NA	1	1		W9A09COLE_RFD	COLE
396	WW3028_4	116145	2009	2692	2	4	11	W9A09YANA	834	15	113	2	4	IRR	80401	1.8022	mg/g	Hurricane Dehydrator 13/10/09	NA	NA	80401	NA	1	1		W9A09YANA_IRR	YANA
397	WW19662	110953	2009	790	2	4	12	W9A09COLE	726	6	73	2	3	IRR	80402	1.8958	mg/g	Lucerne Dehydrator 19/10	NA	NA	80402	NA	1	1		W9A09COLE_IRR	COLE
398	SUN570D	116793	2009	2767	2	4	13	W9A09YANA	368	20	121	2	4	IRR	80403	1.8095	mg/g	Hurricane Dehydrator 13/10/09	NA	NA	80403	NA	1	1		W9A09YANA_IRR	YANA
399	WW20571	114898	2009	1549	2	4	14	W9A09YANA	775	6	18	1	1	IRR	80404	1.6689	mg/g	Lucerne Dehydrator 5/10 - 13/10	NA	NA	80404	NA	1	1		W9A09YANA_IRR	YANA
400	WW19525	115176	2009	1922	2	4	15	W9A09YANA	709	8	40	1	2	RFD	80405	1.55	mg/g	Lucerne Dehydrator 5/10 - 13/10	NA	NA	80405	82200	1	2		W9A09YANA_RFD	YANA
401	WW15839	115201	2009	2263	2	4	17	W9A09YANA	601	8	65	2	3	RFD	80407	0.77198	mg/g	Lucerne Dehydrator 5/10 - 13/10	NA	NA	80407	NA	1	1		W9A09YANA_RFD	YANA
402	WW21162	111006	2009	73	2	4	18	W9A09COLE	806	7	6	1	1	RFD	80408	1.5168	mg/g	Lucerne Dehydrator 20/10	NA	NA	80408	NA	1	1		W9A09COLE_RFD	COLE
403	HRZ04_0191	111423	2009	829	2	4	19	W9A09COLE	122	10	63	2	3	IRR	80409	1.5063	mg/g	Lucerne Dehydrator 19/10	NA	NA	80409	NA	1	1		W9A09COLE_IRR	COLE
404	HRZ05_0224	110832	2009	778	2	4	20	W9A09COLE	187	5	72	2	3	IRR	80410	1.0849	mg/g	Lucerne Dehydrator 19/10	NA	NA	80410	82493	1	2		W9A09COLE_IRR	COLE
405	HRZ06_0265	113823	2009	1052	2	4	21	W9A09COLE	237	30	63	2	3	IRR	80411	2.4326	mg/g	Yanco Hurricane 19/10	NA	NA	80411	NA	1	1		W9A09COLE_IRR	COLE
406	HRZ05_0137	113721	2009	1046	2	4	22	W9A09COLE	174	29	81	2	3	IRR	80412	1.8684	mg/g	Yanco Hurricane 19/10	NA	NA	80412	NA	1	1		W9A09COLE_IRR	COLE
407	QT12844	113412	2009	286	2	4	23	W9A09COLE	307	27	12	1	1	RFD	80413	1.6999	mg/g	Yanco Hurricane 20/10	NA	NA	80413	82913	1	2		W9A09COLE_RFD	COLE
408	VENTURA	112380	2009	567	2	4	24	W9A09COLE	376	18	60	1	2	IRR	80414	1.8787	mg/g	Leeton Hurricane 20/10	NA	NA	80414	NA	1	1		W9A09COLE_IRR	COLE
409	VW2847	115070	2009	1920	2	4	25	W9A09YANA	484	7	62	1	2	RFD	80415	2.1843	mg/g	Lucerne Dehydrator 5/10 - 13/10	NA	NA	80415	81672	1	2		W9A09YANA_RFD	YANA
410	WW19548	111454	2009	1194	2	4	26	W9A09COLE	710	10	94	2	4	RFD	80416	1.1681	mg/g	Lucerne Dehydrator 19/10	NA	NA	80416	NA	1	1		W9A09COLE_RFD	COLE
411	WW19746	114814	2009	1891	2	4	27	W9A09YANA	736	5	62	1	2	RFD	80417	1.6746	mg/g	Lucerne Dehydrator then Leeton Farm 13/10/09	NA	NA	80417	NA	1	1		W9A09YANA_RFD	YANA
412	WW19365	114010	2009	345	2	4	28	W9A09COLE	700	32	10	1	1	RFD	80418	2.4551	mg/g	Yanco Hurricane 20/10	NA	NA	80418	NA	1	1		W9A09COLE_RFD	COLE
413	SUN530D	111878	2009	517	2	4	29	W9A09COLE	358	14	38	1	2	IRR	80419	1.8838	mg/g	Leeton Hurricane 20/10	NA	NA	80419	82790	1	2		W9A09COLE_IRR	COLE
414	VW2324	112463	2009	204	2	4	30	W9A09COLE	467	19	23	1	1	RFD	80420	1.2231	mg/g	Lucerne Dehydrator 20/10	NA	NA	80420	NA	1	1		W9A09COLE_RFD	COLE
415	WW19746	110941	2009	783	2	5	1	W9A09COLE	736	6	61	2	3	IRR	80421	1.7278	mg/g	Lucerne Dehydrator 19/10	NA	NA	80421	82558	1	2		W9A09COLE_IRR	COLE
416	VT1022	113403	2009	282	2	5	2	W9A09COLE	383	27	3	1	1	RFD	80422	1.6651	mg/g	Yanco Hurricane 20/10	NA	NA	80422	NA	1	1		W9A09COLE_RFD	COLE
417	LINCOLN	116803	2009	1728	2	5	3	W9A09YANA	280	21	3	1	1	IRR	80423	1.8855	mg/g	Lucerne Dehydrator 5/10 - 13/10	NA	NA	80423	NA	1	1		W9A09YANA_IRR	YANA
418	SUPER_SERI_1	110538	2009	29	2	5	4	W9A09COLE	374	3	18	1	1	RFD	80424	1.487	mg/g	Yanco Hurricane 20/10	NA	NA	80424	NA	1	1		W9A09COLE_RFD	COLE
419	WW13735	111874	2009	514	2	5	5	W9A09COLE	568	14	34	1	2	IRR	80425	2.4097	mg/g	Leeton Hurricane 20/10	NA	NA	80425	NA	1	1		W9A09COLE_IRR	COLE
420	VW1152	114000	2009	1439	2	5	6	W9A09COLE	444	31	120	2	4	RFD	80426	1.7694	mg/g	Lucerne Dehydrator 19/10	NA	NA	80426	82357	1	2		W9A09COLE_RFD	COLE
421	WW19127	116632	2009	2407	2	5	7	W9A09YANA	694	19	88	2	3	RFD	80427	0.75312	mg/g	Lucerne Dehydrator 5/10 - 13/10	NA	NA	80427	NA	1	1		W9A09YANA_RFD	YANA
422	PASTOR	111639	2009	494	2	5	8	W9A09COLE	300	12	39	1	2	IRR	80428	1.61	mg/g	Leeton Hurricane 20/10	NA	NA	80428	NA	1	1		W9A09COLE_IRR	COLE
423	VW0395	117075	2009	1749	2	5	9	W9A09YANA	428	23	19	1	1	IRR	80429	0.86513	mg/g	Lucerne Dehydrator 5/10 - 13/10	NA	NA	80429	NA	1	1		W9A09YANA_IRR	YANA
424	WAGT033	112968	2009	620	2	5	10	W9A09COLE	530	23	48	1	2	IRR	80430	2.7301	mg/g	Leeton Hurricane 20/10	NA	NA	80430	81214	1	2		W9A09COLE_IRR	COLE
425	HRZ06_0065	111611	2009	125	2	5	11	W9A09COLE	211	12	11	1	1	RFD	80431	1.7848	mg/g	Lucerne Dehydrator 20/10	NA	NA	80431	NA	1	1		W9A09COLE_RFD	COLE
426	EGA_WILLS	116140	2009	2690	2	5	12	W9A09YANA	66	15	108	2	4	IRR	80432	1.8188	mg/g	Hurricane Dehydrator 13/10/09	NA	NA	80432	NA	1	1		W9A09YANA_IRR	YANA
427	WW19754	110315	2009	368	2	5	13	W9A09COLE	739	1	35	1	2	IRR	80433	0.544	mg/g	Leeton Hurricane 20/10	NA	NA	80433	NA	1	1		W9A09COLE_IRR	COLE
428	HRZ06_0488	115330	2009	2277	2	5	14	W9A09YANA	252	9	66	2	3	RFD	80434	1.778	mg/g	Lucerne Dehydrator 5/10 - 13/10	NA	NA	80434	NA	1	1		W9A09YANA_RFD	YANA
429	GBA0608	114927	2009	1898	2	5	15	W9A09YANA	73	6	47	1	2	RFD	80435	1.6234	mg/g	Lucerne Dehydrator then Leeton Farm 13/10/09	NA	NA	80435	NA	1	1		W9A09YANA_RFD	YANA
430	AUS33697	115019	2009	1558	2	5	16	W9A09YANA	38	7	11	1	1	IRR	80436	1.3884	mg/g	Lucerne Dehydrator 5/10 - 13/10	NA	NA	80436	81827	1	2		W9A09YANA_IRR	YANA
431	VQ2791	112412	2009	1283	2	5	17	W9A09COLE	378	18	92	2	4	RFD	80437	1.2257	mg/g	Lucerne Dehydrator 19/10	NA	NA	80437	NA	1	1		W9A09COLE_RFD	COLE
432	VW2001	115513	2009	2644	2	5	18	W9A09YANA	461	10	121	2	4	IRR	80438	1.5623	mg/g	Hurricane Dehydrator 13/10/09	NA	NA	80438	NA	1	1		W9A09YANA_IRR	YANA
433	EGA_WILLS	111245	2009	97	2	5	19	W9A09COLE	66	9	5	1	1	RFD	80439	1.8275	mg/g	Lucerne Dehydrator 20/10	NA	NA	80439	NA	1	1		W9A09COLE_RFD	COLE
434	VW4076	117732	2009	2145	2	5	20	W9A09YANA	517	28	36	1	2	RFD	80440	1.7726	mg/g	Lucerne Dehydrator 5/10 - 13/10	NA	NA	80440	NA	1	1		W9A09YANA_RFD	YANA
435	VW4355	117636	2009	2493	2	5	21	W9A09YANA	520	27	68	2	3	RFD	80441	1.6513	mg/g	Lucerne Dehydrator then Leeton Farm 13/10/09	NA	NA	80441	82048	1	2		W9A09YANA_RFD	YANA
436	WW19201	114914	2009	1892	2	5	22	W9A09YANA	697	6	34	1	2	RFD	80442	1.2769	mg/g	Lucerne Dehydrator then Leeton Farm 13/10/09	NA	NA	80442	NA	1	1		W9A09YANA_RFD	YANA
437	VENTURA	112982	2009	965	2	5	23	W9A09COLE	376	23	62	2	3	IRR	80443	1.6763	mg/g	Yanco Hurricane 19/10	NA	NA	80443	NA	1	1		W9A09COLE_IRR	COLE
438	WW18830	117091	2009	2089	2	5	24	W9A09YANA	677	23	35	1	2	RFD	80444	1.2694	mg/g	Lucerne Dehydrator 5/10 - 13/10	NA	NA	80444	NA	1	1		W9A09YANA_RFD	YANA
439	WW16259	110417	2009	17	2	5	25	W9A09COLE	603	2	17	1	1	RFD	80445	1.6433	mg/g	Lucerne Dehydrator 20/10	NA	NA	80445	NA	1	1		W9A09COLE_RFD	COLE
440	WW21873	114554	2009	1861	2	5	26	W9A09YANA	832	3	58	1	2	RFD	80446	1.7275	mg/g	Lucerne Dehydrator 5/10 - 13/10	NA	NA	80446	NA	1	1		W9A09YANA_RFD	YANA
441	EGA_EAGLEHAWK	111883	2009	519	2	5	27	W9A09COLE	61	14	43	1	2	IRR	80447	0.67258	mg/g	Leeton Hurricane 20/10	NA	NA	80447	82527	1	2		W9A09COLE_IRR	COLE
442	JANZ	117834	2009	1801	2	5	28	W9A09YANA	278	29	10	1	1	IRR	80448	1.3324	mg/g	Lucerne Dehydrator 5/10 - 13/10	NA	NA	80448	NA	1	1		W9A09YANA_IRR	YANA
443	HRZ04_0111	111916	2009	881	2	5	29	W9A09COLE	107	14	76	2	3	IRR	80449	0.50244	mg/g	Lucerne Dehydrator 19/10	NA	NA	80449	NA	1	1		W9A09COLE_IRR	COLE
444	WW20096	116642	2009	2743	2	6	1	W9A09YANA	754	19	98	2	4	IRR	80451	1.766	mg/g	Hurricane Dehydrator 13/10/09	NA	NA	80451	NA	1	1		W9A09YANA_IRR	YANA
445	HRZ06_0183	115493	2009	2636	2	6	2	W9A09YANA	226	10	101	2	4	IRR	80452	1.8365	mg/g	Hurricane Dehydrator 13/10/09	NA	NA	80452	81965	1	2		W9A09YANA_IRR	YANA
446	WW19490	116602	2009	2055	2	6	3	W9A09YANA	704	19	58	1	2	RFD	80453	1.7163	mg/g	Lucerne Dehydrator then Leeton Farm 13/10/09	NA	NA	80453	NA	1	1		W9A09YANA_RFD	YANA
447	HRZ04_0420	118038	2009	2537	2	6	4	W9A09YANA	146	30	86	2	3	RFD	80454	1.5627	mg/g	Lucerne Dehydrator 5/10 - 13/10	NA	NA	80454	NA	1	1		W9A09YANA_RFD	YANA
448	RAC1502	116334	2009	2029	2	6	5	W9A09YANA	342	17	46	1	2	RFD	80455	1.4346	mg/g	Lucerne Dehydrator 5/10 - 13/10	NA	NA	80455	NA	1	1		W9A09YANA_RFD	YANA
449	WW19954	114708	2009	2221	2	6	6	W9A09YANA	751	4	84	2	3	RFD	80456	1.1112	mg/g	Lucerne Dehydrator 5/10 - 13/10	NA	NA	80456	NA	1	1		W9A09YANA_RFD	YANA
450	VW2426	116545	2009	1714	2	6	7	W9A09YANA	476	19	1	1	1	IRR	80457	0.9579	mg/g	Lucerne Dehydrator 5/10 - 13/10	NA	NA	80457	82120	1	2		W9A09YANA_IRR	YANA
451	VV2321	118028	2009	2531	2	6	8	W9A09YANA	406	30	76	2	3	RFD	80458	1.5209	mg/g	Lucerne Dehydrator 5/10 - 13/10	NA	NA	80458	NA	1	1		W9A09YANA_RFD	YANA
452	HRZ06_0147	115183	2009	1927	2	6	9	W9A09YANA	224	8	47	1	2	RFD	80459	1.0918	mg/g	Lucerne Dehydrator 5/10 - 13/10	NA	NA	80459	NA	1	1		W9A09YANA_RFD	YANA
453	WW16452	117873	2009	2162	2	6	10	W9A09YANA	608	29	49	1	2	RFD	80460	1.3946	mg/g	Lucerne Dehydrator 5/10 - 13/10	NA	NA	80460	NA	1	1		W9A09YANA_RFD	YANA
454	WW14311	117376	2009	2119	2	6	11	W9A09YANA	581	25	64	1	2	RFD	80461	1.2355	mg/g	Lucerne Dehydrator 5/10 - 13/10	NA	NA	80461	NA	1	1		W9A09YANA_RFD	YANA
455	QT13365	112956	2009	618	2	6	12	W9A09COLE	314	23	36	1	2	IRR	80462	1.7311	mg/g	Leeton Hurricane 20/10	NA	NA	80462	81700	1	2		W9A09COLE_IRR	COLE
456	WW19525	113466	2009	1013	2	6	13	W9A09COLE	709	27	66	2	3	IRR	80463	2.3691	mg/g	Yanco Hurricane 19/10	NA	NA	80463	NA	1	1		W9A09COLE_IRR	COLE
457	RAC1429	115659	2009	1627	2	6	14	W9A09YANA	332	12	11	1	1	IRR	80464	1.5871	mg/g	Lucerne Dehydrator 5/10 - 13/10	NA	NA	80464	82229	1	2		W9A09YANA_IRR	YANA
458	WW17950	114267	2009	1474	2	6	15	W9A09YANA	625	1	27	1	1	IRR	80465	1.1948	mg/g	Lucerne Dehydrator 5/10 - 13/10	NA	NA	80465	NA	1	1		W9A09YANA_IRR	YANA
459	WW21859	116585	2009	2046	2	6	16	W9A09YANA	831	19	41	1	2	RFD	80466	1.5186	mg/g	Lucerne Dehydrator then Leeton Farm 13/10/09	NA	NA	80466	NA	1	1		W9A09YANA_RFD	YANA
460	HRZ06_0319	116826	2009	1737	2	6	17	W9A09YANA	246	21	26	1	1	IRR	80467	1.3322	mg/g	Lucerne Dehydrator 5/10 - 13/10	NA	NA	80467	NA	1	1		W9A09YANA_IRR	YANA
461	AUS33697	111214	2009	1175	2	6	18	W9A09COLE	38	8	94	2	4	RFD	80468	0.99687	mg/g	Lucerne Dehydrator 19/10	NA	NA	80468	NA	1	1		W9A09COLE_RFD	COLE
462	WW19753	113077	2009	626	2	6	19	W9A09COLE	738	24	37	1	2	IRR	80469	1.7105	mg/g	Leeton Hurricane 20/10	NA	NA	80469	83037	1	2		W9A09COLE_IRR	COLE
463	HRZ06_0075	113851	2009	1418	2	6	20	W9A09COLE	216	30	91	2	4	RFD	80470	2.4191	mg/g	Lucerne Dehydrator 19/10	NA	NA	80470	NA	1	1		W9A09COLE_RFD	COLE
464	GILES	112748	2009	952	2	6	21	W9A09COLE	76	21	68	2	3	IRR	80471	1.1132	mg/g	Yanco Hurricane 19/10	NA	NA	80471	NA	1	1		W9A09COLE_IRR	COLE
465	133513_133	116505	2009	2395	2	6	22	W9A09YANA	5	18	89	2	3	RFD	80472	1.4317	mg/g	Lucerne Dehydrator 5/10 - 13/10	NA	NA	80472	NA	1	1		W9A09YANA_RFD	YANA
466	MCCUBBIN	115324	2009	1946	2	6	23	W9A09YANA	296	9	60	1	2	RFD	80473	1.5434	mg/g	Lucerne Dehydrator then Leeton Farm 13/10/09	NA	NA	80473	NA	1	1		W9A09YANA_RFD	YANA
467	VW4326	116740	2009	2414	2	6	24	W9A09YANA	519	20	68	2	3	RFD	80474	1.2984	mg/g	Lucerne Dehydrator 5/10 - 13/10	NA	NA	80474	82561	1	2		W9A09YANA_RFD	YANA
468	HRZ05_0283	112125	2009	538	2	6	25	W9A09COLE	189	16	45	1	2	IRR	80475	1.2566	mg/g	Leeton Hurricane 20/10	NA	NA	80475	NA	1	1		W9A09COLE_IRR	COLE
469	VW2782	117385	2009	2469	2	6	26	W9A09YANA	482	25	73	2	3	RFD	80476	1.4282	mg/g	Lucerne Dehydrator then Leeton Farm 13/10/09	NA	NA	80476	NA	1	1		W9A09YANA_RFD	YANA
470	WW19514	113301	2009	281	2	6	27	W9A09COLE	708	26	21	1	1	RFD	80477	2.2044	mg/g	Yanco Hurricane 20/10	NA	NA	80477	NA	1	1		W9A09COLE_RFD	COLE
471	VW0318	114250	2009	1465	2	6	28	W9A09YANA	423	1	10	1	1	IRR	80478	1.2058	mg/g	Lucerne Dehydrator 5/10 - 13/10	NA	NA	80478	NA	1	1		W9A09YANA_IRR	YANA
472	WAGT020	111483	2009	116	2	6	29	W9A09COLE	524	11	3	1	1	RFD	80479	1.2661	mg/g	Lucerne Dehydrator 20/10	NA	NA	80479	NA	1	1		W9A09COLE_RFD	COLE
473	TAMMARIN_ROCK	110386	2009	1102	2	6	30	W9A09COLE	375	1	106	2	4	RFD	80480	0.78278	mg/g	Lucerne Dehydrator 19/10	NA	NA	80480	82731	1	2		W9A09COLE_RFD	COLE
474	WAGT022	116268	2009	2706	2	7	1	W9A09YANA	525	16	108	2	4	IRR	80481	1.9201	mg/g	Hurricane Dehydrator 13/10/09	NA	NA	80481	NA	1	1		W9A09YANA_IRR	YANA
475	VU2828_1	112100	2009	174	2	7	2	W9A09COLE	390	16	20	1	1	RFD	80482	2.2047	mg/g	Lucerne Dehydrator 20/10	NA	NA	80482	NA	1	1		W9A09COLE_RFD	COLE
476	WW21843	112424	2009	1286	2	7	3	W9A09COLE	830	18	104	2	4	RFD	80483	1.0618	mg/g	Lucerne Dehydrator 19/10	NA	NA	80483	NA	1	1		W9A09COLE_RFD	COLE
477	VW0318	113387	2009	1373	2	7	4	W9A09COLE	423	26	107	2	4	RFD	80484	1.781	mg/g	Lucerne Dehydrator 19/10	NA	NA	80484	82253	1	2		W9A09COLE_RFD	COLE
478	VW0644	111371	2009	110	2	7	5	W9A09COLE	433	10	11	1	1	RFD	80485	2.4221	mg/g	Lucerne Dehydrator 20/10	NA	NA	80485	NA	1	1		W9A09COLE_RFD	COLE
479	EGA_EAGLEHAWK	115867	2009	2332	2	7	6	W9A09YANA	61	13	91	2	3	RFD	80486	1.5426	mg/g	Lucerne Dehydrator then Leeton Farm 13/10/09	NA	NA	80486	NA	1	1		W9A09YANA_RFD	YANA
480	WW19987	116472	2009	2039	2	7	7	W9A09YANA	752	18	56	1	2	RFD	80487	1.3224	mg/g	Lucerne Dehydrator then Leeton Farm 13/10/09	NA	NA	80487	NA	1	1		W9A09YANA_RFD	YANA
481	HRZ06_0514	111322	2009	825	2	7	8	W9A09COLE	257	9	82	2	3	IRR	80488	2.1362	mg/g	Lucerne Dehydrator 19/10	NA	NA	80488	NA	1	1		W9A09COLE_IRR	COLE
482	VW2843	115037	2009	1566	2	7	9	W9A09YANA	483	7	29	1	1	IRR	80489	1.5186	mg/g	Hurricane Dehydrator 13/10/09	NA	NA	80489	NA	1	1		W9A09YANA_IRR	YANA
483	HRZ04_0511	116062	2009	1681	2	7	10	W9A09YANA	151	15	30	1	1	IRR	80490	0.99412	mg/g	Lucerne Dehydrator 5/10 - 13/10	NA	NA	80490	NA	1	1		W9A09YANA_IRR	YANA
484	HRZ03_0062	114488	2009	2570	2	7	11	W9A09YANA	98	2	120	2	4	IRR	80491	1.2638	mg/g	Hurricane Dehydrator 13/10/09	NA	NA	80491	82076	1	2		W9A09YANA_IRR	YANA
485	EGA_JAEGER	114002	2009	342	2	7	12	W9A09COLE	63	32	2	1	1	RFD	80492	1.5819	mg/g	Yanco Hurricane 20/10	NA	NA	80492	NA	1	1		W9A09COLE_RFD	COLE
486	VW2708	115463	2009	2292	2	7	13	W9A09YANA	481	10	71	2	3	RFD	80493	1.7973	mg/g	Lucerne Dehydrator 5/10 - 13/10	NA	NA	80493	NA	1	1		W9A09YANA_RFD	YANA
487	SUN525D	113171	2009	263	2	7	14	W9A09COLE	354	25	11	1	1	RFD	80494	1.7229	mg/g	Yanco Hurricane 20/10	NA	NA	80494	NA	1	1		W9A09COLE_RFD	COLE
488	VV4963_2	116492	2009	2390	2	7	15	W9A09YANA	415	18	76	2	3	RFD	80495	1.0182	mg/g	Lucerne Dehydrator 5/10 - 13/10	NA	NA	80495	82392	1	2		W9A09YANA_RFD	YANA
489	WW20527	114373	2009	1478	2	7	16	W9A09YANA	772	2	5	1	1	IRR	80496	1.2417	mg/g	Lucerne Dehydrator 5/10 - 13/10	NA	NA	80496	NA	1	1		W9A09YANA_IRR	YANA
490	WW20558	117120	2009	2098	2	7	17	W9A09YANA	774	23	64	1	2	RFD	80497	1.8023	mg/g	Hurricane Dehydrator 13/10/09	NA	NA	80497	NA	1	1		W9A09YANA_RFD	YANA
491	VU3750	116621	2009	2403	2	7	18	W9A09YANA	393	19	77	2	3	RFD	80498	1.4641	mg/g	Lucerne Dehydrator 5/10 - 13/10	NA	NA	80498	83040	1	2		W9A09YANA_RFD	YANA
492	B1227E	117748	2009	2151	2	7	19	W9A09YANA	41	28	52	1	2	RFD	80499	1.454	mg/g	Lucerne Dehydrator 5/10 - 13/10	NA	NA	80499	NA	1	1		W9A09YANA_RFD	YANA
493	VS2177	116393	2009	2718	2	7	20	W9A09YANA	381	17	105	2	4	IRR	80500	1.6935	mg/g	Hurricane Dehydrator 13/10/09	NA	NA	80500	NA	1	1		W9A09YANA_IRR	YANA
494	HRZ06_0265	117061	2009	1746	2	7	21	W9A09YANA	237	23	5	1	1	IRR	80501	1.6617	mg/g	Lucerne Dehydrator 5/10 - 13/10	NA	NA	80501	NA	1	1		W9A09YANA_IRR	YANA
495	EGA_JAEGER	117490	2009	2127	2	7	22	W9A09YANA	63	26	50	1	2	RFD	80502	1.0358	mg/g	Lucerne Dehydrator 5/10 - 13/10	NA	NA	80502	NA	1	1		W9A09YANA_RFD	YANA
496	WAGT023	113436	2009	659	2	7	23	W9A09COLE	526	27	36	1	2	IRR	80503	1.644	mg/g	Leeton Hurricane 20/10	NA	NA	80503	82662	1	2		W9A09COLE_IRR	COLE
497	GBA0608	117688	2009	2861	2	7	24	W9A09YANA	73	27	120	2	4	IRR	80504	1.5292	mg/g	Hurricane Dehydrator 13/10/09	NA	NA	80504	NA	1	1		W9A09YANA_IRR	YANA
498	RAC1393	110745	2009	1136	2	7	25	W9A09COLE	325	4	105	2	4	RFD	80505	1.5798	mg/g	Lucerne Dehydrator 19/10	NA	NA	80505	NA	1	1		W9A09COLE_RFD	COLE
499	VQ2791	110332	2009	374	2	7	26	W9A09COLE	378	1	52	1	2	IRR	80506	1.3122	mg/g	Leeton Hurricane 20/10	NA	NA	80506	NA	1	1		W9A09COLE_IRR	COLE
500	RAC1429	113027	2009	1349	2	7	27	W9A09COLE	332	23	107	2	4	RFD	80507	2.2336	mg/g	Lucerne Dehydrator 19/10	NA	NA	80507	NA	1	1		W9A09COLE_RFD	COLE
501	VV3277	111345	2009	1187	2	7	28	W9A09COLE	412	9	105	2	4	RFD	80508	1.206	mg/g	Lucerne Dehydrator 19/10	NA	NA	80284	80508	1	2		W9A09COLE_RFD	COLE
502	HRZ06_0321	117883	2009	2168	2	7	29	W9A09YANA	247	29	59	1	2	RFD	80509	1.1397	mg/g	Lucerne Dehydrator 5/10 - 13/10	NA	NA	80509	NA	1	1		W9A09YANA_RFD	YANA
503	VW0385	116217	2009	2022	2	7	30	W9A09YANA	426	16	57	1	2	RFD	80510	1.216	mg/g	Lucerne Dehydrator 5/10 - 13/10	NA	NA	80510	NA	1	1		W9A09YANA_RFD	YANA
504	90670_91	112977	2009	624	2	8	1	W9A09COLE	22	23	57	1	2	IRR	80511	1.1758	mg/g	Leeton Hurricane 20/10	NA	NA	80511	NA	1	1		W9A09COLE_IRR	COLE
505	HRZ06_0067	112084	2009	170	2	8	2	W9A09COLE	213	16	4	1	1	RFD	80512	2.2158	mg/g	Lucerne Dehydrator 20/10	NA	NA	80512	NA	1	1		W9A09COLE_RFD	COLE
506	WW18949	116772	2009	2757	2	8	3	W9A09YANA	688	20	100	2	4	IRR	80513	1.7787	mg/g	Hurricane Dehydrator 13/10/09	NA	NA	80513	NA	1	1		W9A09YANA_IRR	YANA
507	WW19473	113760	2009	1417	2	8	4	W9A09COLE	703	29	120	2	4	RFD	80514	2.1062	mg/g	Lucerne Dehydrator 19/10	NA	NA	80514	NA	1	1		W9A09COLE_RFD	COLE
508	HRZ05_0085	113931	2009	706	2	8	5	W9A09COLE	160	31	51	1	2	IRR	80515	1.8526	mg/g	Leeton Hurricane 20/10	NA	NA	80515	83091	1	2		W9A09COLE_IRR	COLE
509	WW19127	111009	2009	76	2	8	6	W9A09COLE	694	7	9	1	1	RFD	80516	2.1014	mg/g	Lucerne Dehydrator 20/10	NA	NA	80516	NA	1	1		W9A09COLE_RFD	COLE
510	HRZ06_0252	110511	2009	1112	2	8	7	W9A09COLE	234	2	111	2	4	RFD	80517	1.7719	mg/g	Lucerne Dehydrator 19/10	NA	NA	80517	NA	1	1		W9A09COLE_RFD	COLE
511	VW1256	112390	2009	922	2	8	8	W9A09COLE	451	18	70	2	3	IRR	80518	2.1999	mg/g	Yanco Hurricane 19/10	NA	NA	80518	NA	1	1		W9A09COLE_IRR	COLE
512	VW3789	110996	2009	1166	2	8	9	W9A09COLE	512	6	116	2	4	RFD	80519	0.99672	mg/g	Lucerne Dehydrator 19/10	NA	NA	80519	83078	1	2		W9A09COLE_RFD	COLE
513	VW2311	116646	2009	2745	2	8	10	W9A09YANA	465	19	102	2	4	IRR	80520	1.8535	mg/g	Hurricane Dehydrator 13/10/09	NA	NA	80520	NA	1	1		W9A09YANA_IRR	YANA
514	EGA_GREGORY	110450	2009	386	2	8	11	W9A09COLE	62	2	50	1	2	IRR	80521	0.94128	mg/g	Leeton Hurricane 20/10	NA	NA	80521	NA	1	1		W9A09COLE_IRR	COLE
515	VW3463	113096	2009	632	2	8	12	W9A09COLE	497	24	56	1	2	IRR	80522	1.4615	mg/g	Leeton Hurricane 20/10	NA	NA	80522	NA	1	1		W9A09COLE_IRR	COLE
516	VW1929	110396	2009	1106	2	8	13	W9A09COLE	459	1	116	2	4	RFD	80523	0.48154	mg/g	Lucerne Dehydrator 19/10	NA	NA	80523	82604	1	2		W9A09COLE_RFD	COLE
517	HRZ06_0143	112497	2009	578	2	8	14	W9A09COLE	222	19	57	1	2	IRR	80524	1.4632	mg/g	Leeton Hurricane 20/10	NA	NA	80524	NA	1	1		W9A09COLE_IRR	COLE
518	VW3195	116035	2009	1670	2	8	15	W9A09YANA	488	15	3	1	1	IRR	80525	0.97914	mg/g	Lucerne Dehydrator 5/10 - 13/10	NA	NA	80525	NA	1	1		W9A09YANA_IRR	YANA
519	WAWHT3016	113165	2009	259	2	8	16	W9A09COLE	545	25	5	1	1	RFD	80526	1.9571	mg/g	Yanco Hurricane 20/10	NA	NA	80526	NA	1	1		W9A09COLE_RFD	COLE
520	PEAKE	112277	2009	914	2	8	17	W9A09COLE	302	17	77	2	3	IRR	80527	1.8846	mg/g	Lucerne Dehydrator 19/10	NA	NA	80527	82772	1	2		W9A09COLE_IRR	COLE
521	HRZ03_0076	110428	2009	22	2	8	18	W9A09COLE	103	2	28	1	1	RFD	80528	2.1076	mg/g	Yanco Hurricane 20/10	NA	NA	80528	NA	1	1		W9A09COLE_RFD	COLE
522	WW16917	114146	2009	363	2	8	19	W9A09COLE	611	33	26	1	1	RFD	80529	1.7589	mg/g	Yanco Hurricane 20/10	NA	NA	80529	NA	1	1		W9A09COLE_RFD	COLE
523	HRZ06_0055	112834	2009	598	2	8	20	W9A09COLE	206	22	34	1	2	IRR	80530	1.7133	mg/g	Leeton Hurricane 20/10	NA	NA	80530	81766	1	2		W9A09COLE_IRR	COLE
524	SENTINEL	111891	2009	522	2	8	21	W9A09COLE	347	14	51	1	2	IRR	80531	2.0895	mg/g	Leeton Hurricane 20/10	NA	NA	80531	NA	1	1		W9A09COLE_IRR	COLE
525	VW0222	110713	2009	763	2	8	22	W9A09COLE	418	4	73	2	3	IRR	80532	1.7904	mg/g	Yanco Hurricane 19/10	NA	NA	80532	NA	1	1		W9A09COLE_IRR	COLE
526	LPB04_2172	110732	2009	1128	2	8	23	W9A09COLE	283	4	92	2	4	RFD	80533	1.4929	mg/g	Lucerne Dehydrator 19/10	NA	NA	80533	NA	1	1		W9A09COLE_RFD	COLE
527	WW20652	111618	2009	127	2	8	24	W9A09COLE	784	12	18	1	1	RFD	80534	2.5069	mg/g	Yanco Hurricane 20/10	NA	NA	80534	NA	1	1		W9A09COLE_RFD	COLE
528	HRZ06_0265	110819	2009	413	2	8	25	W9A09COLE	237	5	59	1	2	IRR	80535	1.4476	mg/g	Leeton Hurricane 20/10	NA	NA	80535	NA	1	1		W9A09COLE_IRR	COLE
529	HRZ06_0078	114892	2009	1545	2	8	26	W9A09YANA	219	6	12	1	1	IRR	80536	1.2286	mg/g	Lucerne Dehydrator 5/10 - 13/10	NA	NA	80536	83163	1	2		W9A09YANA_IRR	YANA
530	CURRAWONG	113430	2009	297	2	8	27	W9A09COLE	55	27	30	1	1	RFD	80537	2.7325	mg/g	Yanco Hurricane 20/10	NA	NA	80537	NA	1	1		W9A09COLE_RFD	COLE
531	WAGT025	114720	2009	2229	2	8	28	W9A09YANA	527	4	96	2	3	RFD	80538	1.1369	mg/g	Lucerne Dehydrator 5/10 - 13/10	NA	NA	80538	NA	1	1		W9A09YANA_RFD	YANA
532	HRZ06_0319	114657	2009	1865	2	8	29	W9A09YANA	246	4	33	1	2	RFD	80539	1.7361	mg/g	Lucerne Dehydrator 5/10 - 13/10	NA	NA	80539	NA	1	1		W9A09YANA_RFD	YANA
533	VW0395	110779	2009	62	2	8	30	W9A09COLE	428	5	19	1	1	RFD	80540	1.9557	mg/g	Yanco Hurricane 20/10	NA	NA	80540	NA	1	1		W9A09COLE_RFD	COLE
534	RAC1374	117045	2009	2797	2	9	1	W9A09YANA	324	22	117	2	4	IRR	80541	1.8266	mg/g	Hurricane Dehydrator 13/10/09	NA	NA	80541	NA	1	1		W9A09YANA_IRR	YANA
535	HRZ06_2087	113592	2009	1029	2	9	2	W9A09COLE	266	28	72	2	3	IRR	80542	2.0622	mg/g	Yanco Hurricane 19/10	NA	NA	80542	NA	1	1		W9A09COLE_IRR	COLE
536	NLS03SB52	113475	2009	1019	2	9	3	W9A09COLE	299	27	75	2	3	IRR	80543	2.2595	mg/g	Yanco Hurricane 19/10	NA	NA	80543	81962	1	2		W9A09COLE_IRR	COLE
537	QT13626	110654	2009	41	2	9	4	W9A09COLE	320	4	14	1	1	RFD	80544	1.7422	mg/g	Lucerne Dehydrator 20/10	NA	NA	80544	NA	1	1		W9A09COLE_RFD	COLE
538	HRZ04_0154	117944	2009	2888	2	9	5	W9A09YANA	115	29	120	2	4	IRR	80545	2.0632	mg/g	Hurricane Dehydrator 13/10/09	NA	NA	80545	NA	1	1		W9A09YANA_IRR	YANA
539	WW19473	117371	2009	2116	2	9	6	W9A09YANA	703	25	59	1	2	RFD	80546	1.3731	mg/g	Lucerne Dehydrator 5/10 - 13/10	NA	NA	80546	81896	1	2		W9A09YANA_RFD	YANA
540	HRZ06_0488	114942	2009	1904	2	9	7	W9A09YANA	252	6	62	1	2	RFD	80547	1.8718	mg/g	Lucerne Dehydrator 5/10 - 13/10	NA	NA	80547	NA	1	1		W9A09YANA_RFD	YANA
541	HRZ03_0005	116077	2009	2009	2	9	8	W9A09YANA	88	15	45	1	2	RFD	80548	1.6773	mg/g	Lucerne Dehydrator 5/10 - 13/10	NA	NA	80548	NA	1	1		W9A09YANA_RFD	YANA
542	VW1174	115792	2009	1648	2	9	9	W9A09YANA	445	13	16	1	1	IRR	80549	1.4944	mg/g	Lucerne Dehydrator 5/10 - 13/10	NA	NA	80549	NA	1	1		W9A09YANA_IRR	YANA
543	HRZ06_0141	116454	2009	2036	2	9	10	W9A09YANA	221	18	38	1	2	RFD	80550	1.3367	mg/g	Lucerne Dehydrator then Leeton Farm 13/10/09	NA	NA	80550	NA	1	1		W9A09YANA_RFD	YANA
544	LPB04_2324	117239	2009	2106	2	9	11	W9A09YANA	287	24	55	1	2	RFD	80551	2.2245	mg/g	Lucerne Dehydrator 5/10 - 13/10	NA	NA	80551	NA	1	1		W9A09YANA_RFD	YANA
545	VW1256	116384	2009	2387	2	9	12	W9A09YANA	451	17	96	2	3	RFD	80552	1.1882	mg/g	Lucerne Dehydrator 5/10 - 13/10	NA	NA	80552	82916	1	2		W9A09YANA_RFD	YANA
546	VW1256	113149	2009	1356	2	9	13	W9A09COLE	451	24	109	2	4	RFD	80553	1.7551	mg/g	Lucerne Dehydrator 19/10	NA	NA	80553	NA	1	1		W9A09COLE_RFD	COLE
547	HRZ04_0420	116314	2009	1699	2	9	14	W9A09YANA	146	17	26	1	1	IRR	80554	1.2403	mg/g	Lucerne Dehydrator 5/10 - 13/10	NA	NA	80554	NA	1	1		W9A09YANA_IRR	YANA
548	HRZ06_0321	111304	2009	822	2	9	15	W9A09COLE	247	9	64	2	3	IRR	80555	1.9458	mg/g	Lucerne Dehydrator 19/10	NA	NA	80555	NA	1	1		W9A09COLE_IRR	COLE
549	EGA_WEDGETAIL	113816	2009	701	2	9	16	W9A09COLE	65	30	56	1	2	IRR	80556	0.89126	mg/g	Leeton Hurricane 20/10	NA	NA	80556	82137	1	2		W9A09COLE_IRR	COLE
550	DRYSDALE	111440	2009	839	2	9	17	W9A09COLE	59	10	80	2	3	IRR	80557	0.90429	mg/g	Lucerne Dehydrator 19/10	NA	NA	80557	NA	1	1		W9A09COLE_IRR	COLE
551	VV2401	116295	2009	1694	2	9	18	W9A09YANA	407	17	7	1	1	IRR	80558	1.1684	mg/g	Lucerne Dehydrator 5/10 - 13/10	NA	NA	80558	NA	1	1		W9A09YANA_IRR	YANA
552	WAGT019	111082	2009	807	2	9	19	W9A09COLE	523	7	82	2	3	IRR	80559	1.9583	mg/g	Lucerne Dehydrator 19/10	NA	NA	80559	NA	1	1		W9A09COLE_IRR	COLE
553	AUS33467	112933	2009	240	2	9	21	W9A09COLE	28	23	13	1	1	RFD	80561	2.3997	mg/g	Yanco Hurricane 20/10	NA	NA	80561	NA	1	1		W9A09COLE_RFD	COLE
554	WW18924	118066	2009	2903	2	9	22	W9A09YANA	684	30	114	2	4	IRR	80562	1.5446	mg/g	Hurricane Dehydrator 13/10/09	NA	NA	80562	82854	1	2		W9A09YANA_IRR	YANA
555	WW14309	115051	2009	1911	2	9	23	W9A09YANA	580	7	43	1	2	RFD	80563	1.6742	mg/g	Lucerne Dehydrator 5/10 - 13/10	NA	NA	80563	NA	1	1		W9A09YANA_RFD	YANA
556	HRZ05_0130	115507	2009	2641	2	9	24	W9A09YANA	170	10	115	2	4	IRR	80564	1.7696	mg/g	Hurricane Dehydrator 13/10/09	NA	NA	80564	NA	1	1		W9A09YANA_IRR	YANA
557	SUNVALE	113940	2009	709	2	9	25	W9A09COLE	373	31	60	1	2	IRR	80565	1.7686	mg/g	Leeton Hurricane 20/10	NA	NA	80565	NA	1	1		W9A09COLE_IRR	COLE
558	WAWHT2793	114098	2009	1443	2	9	26	W9A09COLE	536	32	98	2	4	RFD	80566	1.9992	mg/g	Lucerne Dehydrator 19/10	NA	NA	80566	NA	1	1		W9A09COLE_RFD	COLE
559	VW2847	111383	2009	112	2	9	27	W9A09COLE	484	10	23	1	1	RFD	80567	1.8202	mg/g	Lucerne Dehydrator 20/10	NA	NA	80567	NA	1	1		W9A09COLE_RFD	COLE
560	HRZ04_0231	114651	2009	1524	2	9	28	W9A09YANA	131	4	27	1	1	IRR	80568	1.6383	mg/g	Lucerne Dehydrator 13/10/09	NA	NA	80568	NA	1	1		W9A09YANA_IRR	YANA
561	HRZ06_0065	111158	2009	439	2	9	29	W9A09COLE	211	8	38	1	2	IRR	80569	2.2941	mg/g	Leeton Hurricane 20/10	NA	NA	80569	81982	1	2		W9A09COLE_IRR	COLE
562	WW20665	114227	2009	1456	2	9	30	W9A09COLE	786	33	107	2	4	RFD	80570	2.2319	mg/g	Lucerne Dehydrator 19/10	NA	NA	80570	NA	1	1		W9A09COLE_RFD	COLE
563	CURRAWONG	113712	2009	1041	2	10	1	W9A09COLE	55	29	72	2	3	IRR	80571	1.4822	mg/g	Yanco Hurricane 19/10	NA	NA	80571	82068	1	2		W9A09COLE_IRR	COLE
564	WW19492	111092	2009	1168	2	10	2	W9A09COLE	705	7	92	2	4	RFD	80572	1.3599	mg/g	Lucerne Dehydrator 19/10	NA	NA	80572	NA	1	1		W9A09COLE_RFD	COLE
565	WW20192	114253	2009	1466	2	10	3	W9A09YANA	757	1	13	1	1	IRR	80573	1.3125	mg/g	Lucerne Dehydrator 5/10 - 13/10	NA	NA	80573	NA	1	1		W9A09YANA_IRR	YANA
566	HRZ04_0354	114372	2009	1477	2	10	4	W9A09YANA	142	2	4	1	1	IRR	80574	1.1355	mg/g	Lucerne Dehydrator 13/10/09	NA	NA	80574	NA	1	1		W9A09YANA_IRR	YANA
567	VW0404	112855	2009	611	2	10	5	W9A09COLE	432	22	55	1	2	IRR	80575	2.1519	mg/g	Leeton Hurricane 20/10	NA	NA	80575	NA	1	1		W9A09COLE_IRR	COLE
568	HRZ06_0147	112241	2009	550	2	10	6	W9A09COLE	224	17	41	1	2	IRR	80576	1.3705	mg/g	Leeton Hurricane 20/10	NA	NA	80576	NA	1	1		W9A09COLE_IRR	COLE
569	VT1155	110651	2009	40	2	10	7	W9A09COLE	384	4	11	1	1	RFD	80577	1.6257	mg/g	Lucerne Dehydrator 20/10	NA	NA	80577	NA	1	1		W9A09COLE_RFD	COLE
570	WW20291	113887	2009	332	2	10	8	W9A09COLE	763	31	7	1	1	RFD	80578	2.1335	mg/g	Yanco Hurricane 20/10	NA	NA	80578	82723	1	2		W9A09COLE_RFD	COLE
571	WW9696	113711	2009	1040	2	10	9	W9A09COLE	837	29	71	2	3	IRR	80579	1.5811	mg/g	Yanco Hurricane 19/10	NA	NA	80579	NA	1	1		W9A09COLE_IRR	COLE
572	HRZ04_0421	114684	2009	1874	2	10	10	W9A09YANA	147	4	60	1	2	RFD	80580	1.6285	mg/g	Lucerne Dehydrator 5/10 - 13/10	NA	NA	80580	81712	1	2		W9A09YANA_RFD	YANA
573	WW16452	116172	2009	1686	2	10	11	W9A09YANA	608	16	12	1	1	IRR	80581	1.0655	mg/g	Lucerne Dehydrator 13/10/09	NA	NA	80581	NA	1	1		W9A09YANA_IRR	YANA
574	EGA_STAMPEDE	111230	2009	1180	2	10	12	W9A09COLE	64	8	110	2	4	RFD	80582	1.0166	mg/g	Lucerne Dehydrator 19/10	NA	NA	80582	NA	1	1		W9A09COLE_RFD	COLE
575	HRZ04_0531	114203	2009	1091	2	10	13	W9A09COLE	156	33	83	2	3	IRR	80583	1.7248	mg/g	Yanco Hurricane 19/10	NA	NA	80583	NA	1	1		W9A09COLE_IRR	COLE
576	8890_213	113447	2009	662	2	10	14	W9A09COLE	21	27	47	1	2	IRR	80584	1.3633	mg/g	Leeton Hurricane 20/10	NA	NA	80584	82776	1	2		W9A09COLE_IRR	COLE
577	WAGT023	116522	2009	2732	2	10	15	W9A09YANA	526	18	106	2	4	IRR	80585	1.918	mg/g	Hurricane Dehydrator 13/10/09	NA	NA	80585	NA	1	1		W9A09YANA_IRR	YANA
578	WW20665	112692	2009	219	2	10	16	W9A09COLE	786	21	12	1	1	RFD	80586	1.8092	mg/g	Yanco Hurricane 20/10	NA	NA	80586	NA	1	1		W9A09COLE_RFD	COLE
579	RAC1374	117482	2009	2125	2	10	17	W9A09YANA	324	26	42	1	2	RFD	80587	1.0532	mg/g	Lucerne Dehydrator 5/10 - 13/10	NA	NA	80587	NA	1	1		W9A09YANA_RFD	YANA
580	SUN562A	117601	2009	2134	2	10	18	W9A09YANA	366	27	33	1	2	RFD	80588	1.8944	mg/g	Lucerne Dehydrator 5/10 - 13/10	NA	NA	80588	NA	1	1		W9A09YANA_RFD	YANA
581	HRZ06_0252	117098	2009	2090	2	10	19	W9A09YANA	234	23	42	1	2	RFD	80589	2.0654	mg/g	Lucerne Dehydrator 13/10/09	NA	NA	80589	82897	1	2		W9A09YANA_RFD	YANA
582	WW21687	116554	2009	1717	2	10	20	W9A09YANA	827	19	10	1	1	IRR	80590	1.5526	mg/g	Lucerne Dehydrator 5/10 - 13/10	NA	NA	80590	NA	1	1		W9A09YANA_IRR	YANA
583	HRZ06_2082	113216	2009	644	2	10	21	W9A09COLE	265	25	56	1	2	IRR	80591	1.472	mg/g	Leeton Hurricane 20/10	NA	NA	80591	NA	1	1		W9A09COLE_IRR	COLE
584	WEEBILL1	116523	2009	2733	2	10	22	W9A09YANA	550	18	107	2	4	IRR	80592	1.5696	mg/g	Hurricane Dehydrator 13/10/09	NA	NA	80592	NA	1	1		W9A09YANA_IRR	YANA
585	HRZ06_2070	112217	2009	182	2	10	23	W9A09COLE	261	17	17	1	1	RFD	80593	1.317	mg/g	Lucerne Dehydrator 20/10	NA	NA	80593	NA	1	1		W9A09COLE_RFD	COLE
586	HRZ06_0143	110763	2009	54	2	10	24	W9A09COLE	222	5	3	1	1	RFD	80594	1.0137	mg/g	Lucerne Dehydrator 20/10	NA	NA	80594	82844	1	2		W9A09COLE_RFD	COLE
587	VQ2791	114262	2009	1470	2	10	25	W9A09YANA	378	1	22	1	1	IRR	80595	0.68064	mg/g	Lucerne Dehydrator 5/10 - 13/10	NA	NA	80595	NA	1	1		W9A09YANA_IRR	YANA
588	AUS33662	112429	2009	1290	2	10	26	W9A09COLE	37	18	109	2	4	RFD	80596	1.741	mg/g	Lucerne Dehydrator 19/10	NA	NA	80596	NA	1	1		W9A09COLE_RFD	COLE
589	WW19682	118018	2009	2529	2	10	27	W9A09YANA	730	30	66	2	3	RFD	80597	1.3605	mg/g	Lucerne Dehydrator 5/10 - 13/10	NA	NA	80597	82141	1	2		W9A09YANA_RFD	YANA
590	WW19753	111111	2009	1172	2	10	28	W9A09COLE	738	7	111	2	4	RFD	80598	0.91664	mg/g	Lucerne Dehydrator 19/10	NA	NA	80598	NA	1	1		W9A09COLE_RFD	COLE
591	VW0222	115731	2009	2315	2	10	29	W9A09YANA	418	12	83	2	3	RFD	80599	1.1676	mg/g	Lucerne Dehydrator 5/10 - 13/10	NA	NA	80599	NA	1	1		W9A09YANA_RFD	YANA
592	LPB04_2324	113239	2009	996	2	10	30	W9A09COLE	287	25	79	2	3	IRR	80600	2.1712	mg/g	Yanco Hurricane 19/10	NA	NA	80600	NA	1	1		W9A09COLE_IRR	COLE
593	90670_91	114132	2009	356	3	1	1	W9A09COLE	22	33	12	1	1	RFD	80601	2.4612	mg/g	Yanco Hurricane 20/10	NA	NA	80601	NA	1	1		W9A09COLE_RFD	COLE
594	SUN570D	117650	2009	2498	3	1	2	W9A09YANA	368	27	82	2	3	RFD	80602	1.035	mg/g	Lucerne Dehydrator then Leeton Farm 13/10/09	NA	NA	80602	NA	1	1		W9A09YANA_RFD	YANA
595	WW19954	111865	2009	158	3	1	3	W9A09COLE	751	14	25	1	1	RFD	80603	1.7976	mg/g	Lucerne Dehydrator 20/10	NA	NA	80603	82055	1	2		W9A09COLE_RFD	COLE
596	HRZ06_0057	111745	2009	146	3	1	4	W9A09COLE	207	13	25	1	1	RFD	80604	1.9405	mg/g	Lucerne Dehydrator 20/10	NA	NA	80604	NA	1	1		W9A09COLE_RFD	COLE
597	RAC1451	113797	2009	697	3	1	5	W9A09COLE	335	30	37	1	2	IRR	80605	2.5489	mg/g	Leeton Hurricane 20/10	NA	NA	80605	NA	1	1		W9A09COLE_IRR	COLE
598	QT13365	111549	2009	845	3	1	6	W9A09COLE	314	11	69	2	3	IRR	80606	2.0576	mg/g	Lucerne Dehydrator 19/10	NA	NA	80606	NA	1	1		W9A09COLE_IRR	COLE
599	WW20469	115067	2009	1918	3	1	7	W9A09YANA	768	7	59	1	2	RFD	80607	0.9631	mg/g	Lucerne Dehydrator 5/10 - 13/10	NA	NA	80607	NA	1	1		W9A09YANA_RFD	YANA
600	WW19492	114841	2009	2236	3	1	8	W9A09YANA	705	5	89	2	3	RFD	80608	1.3279	mg/g	Lucerne Dehydrator 5/10 - 13/10	NA	NA	80608	NA	1	1		W9A09YANA_RFD	YANA
601	WW19663	110863	2009	1145	3	1	9	W9A09COLE	727	5	103	2	4	RFD	80609	1.3804	mg/g	Lucerne Dehydrator 19/10	NA	NA	80609	82988	1	2		W9A09COLE_RFD	COLE
602	VW1929	111876	2009	516	3	1	10	W9A09COLE	459	14	36	1	2	IRR	80610	1.8172	mg/g	Leeton Hurricane 20/10	NA	NA	80610	NA	1	1		W9A09COLE_IRR	COLE
603	WAWHT3016	116400	2009	2721	3	1	11	W9A09YANA	545	17	112	2	4	IRR	80611	1.9342	mg/g	Hurricane Dehydrator 13/10/09	NA	NA	80611	NA	1	1		W9A09YANA_IRR	YANA
604	VW0385	115378	2009	2630	3	1	12	W9A09YANA	426	9	114	2	4	IRR	80612	1.4882	mg/g	Hurricane Dehydrator 13/10/09	NA	NA	80612	NA	1	1		W9A09YANA_IRR	YANA
605	LPB04_2238	111384	2009	113	3	1	13	W9A09COLE	284	10	24	1	1	RFD	80613	0.98416	mg/g	Lucerne Dehydrator 20/10	NA	NA	80613	NA	1	1		W9A09COLE_RFD	COLE
606	WW19891	117640	2009	2494	3	1	14	W9A09YANA	746	27	72	2	3	RFD	80614	1.2705	mg/g	Lucerne Dehydrator then Leeton Farm 13/10/09	NA	NA	80614	82486	1	2		W9A09YANA_RFD	YANA
607	VS2177	118045	2009	2541	3	1	15	W9A09YANA	381	30	93	2	3	RFD	80615	0.85151	mg/g	Lucerne Dehydrator 5/10 - 13/10	NA	NA	80615	NA	1	1		W9A09YANA_RFD	YANA
608	QT12844	115407	2009	1600	3	1	17	W9A09YANA	307	10	15	1	1	IRR	80617	1.7892	mg/g	Lucerne Dehydrator 13/10/09	NA	NA	80617	NA	1	1		W9A09YANA_IRR	YANA
609	WW20068	110854	2009	1141	3	1	18	W9A09COLE	753	5	94	2	4	RFD	80618	1.3587	mg/g	Lucerne Dehydrator 19/10	NA	NA	80618	NA	1	1		W9A09COLE_RFD	COLE
610	HRZ06_2082	112318	2009	1281	3	1	19	W9A09COLE	265	17	118	2	4	RFD	80619	1.2108	mg/g	Lucerne Dehydrator 19/10	NA	NA	80619	83084	1	2		W9A09COLE_RFD	COLE
611	MCCUBBIN	116417	2009	1702	3	1	20	W9A09YANA	296	18	1	1	1	IRR	80620	0.62169	mg/g	Lucerne Dehydrator 5/10 - 13/10	NA	NA	80620	NA	1	1		W9A09YANA_IRR	YANA
612	WW19410	112473	2009	568	3	1	21	W9A09COLE	701	19	33	1	2	IRR	80621	1.516	mg/g	Leeton Hurricane 20/10	NA	NA	80621	NA	1	1		W9A09COLE_IRR	COLE
613	QT13365	115226	2009	2274	3	1	22	W9A09YANA	314	8	90	2	3	RFD	80622	1.2064	mg/g	Lucerne Dehydrator 5/10 - 13/10	NA	NA	80622	NA	1	1		W9A09YANA_RFD	YANA
614	WW18949	112659	2009	1312	3	1	23	W9A09COLE	688	20	99	2	4	RFD	80623	0.82832	mg/g	Lucerne Dehydrator 19/10	NA	NA	80623	NA	1	1		W9A09COLE_RFD	COLE
615	WI25053	113681	2009	688	3	1	24	W9A09COLE	551	29	41	1	2	IRR	80624	1.4997	mg/g	Leeton Hurricane 20/10	NA	NA	80624	81972	1	2		W9A09COLE_IRR	COLE
616	QT12667	116649	2009	2747	3	1	25	W9A09YANA	303	19	105	2	4	IRR	80625	1.8549	mg/g	Hurricane Dehydrator 13/10/09	NA	NA	80625	NA	1	1		W9A09YANA_IRR	YANA
617	HRZ04_0354	116011	2009	2682	3	1	26	W9A09YANA	142	14	107	2	4	IRR	80626	1.4568	mg/g	Hurricane Dehydrator 13/10/09	NA	NA	80626	NA	1	1		W9A09YANA_IRR	YANA
618	8890_213	114329	2009	2198	3	1	27	W9A09YANA	21	1	89	2	3	RFD	80627	1.076	mg/g	Lucerne Dehydrator 5/10 - 13/10	NA	NA	80627	NA	1	1		W9A09YANA_RFD	YANA
619	HRZ04_0161	115489	2009	2634	3	1	28	W9A09YANA	119	10	97	2	4	IRR	80628	1.9476	mg/g	Hurricane Dehydrator 13/10/09	NA	NA	80628	83126	1	2		W9A09YANA_IRR	YANA
620	EGA_STAMPEDE	110463	2009	742	3	1	29	W9A09COLE	64	2	63	2	3	IRR	80629	2.3937	mg/g	Yanco Hurricane 19/10	NA	NA	80629	NA	1	1		W9A09COLE_IRR	COLE
621	WW20664	111142	2009	91	3	1	30	W9A09COLE	785	8	22	1	1	RFD	80630	0.9953	mg/g	Lucerne Dehydrator 20/10	NA	NA	80630	NA	1	1		W9A09COLE_RFD	COLE
622	7896_254	113289	2009	274	3	2	1	W9A09COLE	16	26	9	1	1	RFD	80631	1.9589	mg/g	Yanco Hurricane 20/10	NA	NA	80631	NA	1	1		W9A09COLE_RFD	COLE
623	CHARA	117129	2009	2446	3	2	2	W9A09YANA	52	23	73	2	3	RFD	80632	1.7985	mg/g	Hurricane Dehydrator 13/10/09	NA	NA	80632	NA	1	1		W9A09YANA_RFD	YANA
624	AUS33466	115470	2009	2293	3	2	3	W9A09YANA	27	10	78	2	3	RFD	80633	1.7295	mg/g	Lucerne Dehydrator 5/10 - 13/10	NA	NA	80633	NA	1	1		W9A09YANA_RFD	YANA
625	ATTILA	117840	2009	1804	3	2	4	W9A09YANA	25	29	16	1	1	IRR	80634	1.1751	mg/g	Lucerne Dehydrator 5/10 - 13/10	NA	NA	80634	NA	1	1		W9A09YANA_IRR	YANA
626	HRZ06_0075	111722	2009	136	3	2	5	W9A09COLE	216	13	2	1	1	RFD	80635	2.1785	mg/g	Lucerne Dehydrator 20/10	NA	NA	80635	82751	1	2		W9A09COLE_RFD	COLE
627	WW18919	112876	2009	960	3	2	6	W9A09COLE	682	22	76	2	3	IRR	80636	1.1629	mg/g	Yanco Hurricane 19/10	NA	NA	80636	NA	1	1		W9A09COLE_IRR	COLE
628	RAC1502	111428	2009	831	3	2	7	W9A09COLE	342	10	68	2	3	IRR	80637	2.372	mg/g	Lucerne Dehydrator 19/10	NA	NA	80637	NA	1	1		W9A09COLE_IRR	COLE
629	WW14396	114997	2009	2603	3	2	8	W9A09YANA	583	6	117	2	4	IRR	80638	1.2698	mg/g	Hurricane Dehydrator 13/10/09	NA	NA	80638	NA	1	1		W9A09YANA_IRR	YANA
630	WAGT022	116747	2009	2417	3	2	9	W9A09YANA	525	20	75	2	3	RFD	80639	1.0185	mg/g	Lucerne Dehydrator then Leeton Farm 13/10/09	NA	NA	80639	NA	1	1		W9A09YANA_RFD	YANA
631	WW19932	117702	2009	1787	3	2	10	W9A09YANA	747	28	6	1	1	IRR	80640	1.434	mg/g	Lucerne Dehydrator 5/10 - 13/10	NA	NA	80640	NA	1	1		W9A09YANA_IRR	YANA
632	WW18946	114529	2009	1851	3	2	11	W9A09YANA	687	3	33	1	2	RFD	80641	1.3823	mg/g	Lucerne Dehydrator 5/10 - 13/10	NA	NA	80641	NA	1	1		W9A09YANA_RFD	YANA
633	WW20664	110951	2009	789	3	2	12	W9A09COLE	785	6	71	2	3	IRR	80642	1.9452	mg/g	Lucerne Dehydrator 19/10	NA	NA	80642	82654	1	2		W9A09COLE_IRR	COLE
634	VW4056	112045	2009	895	3	2	13	W9A09COLE	514	15	85	2	3	IRR	80643	1.6305	mg/g	Lucerne Dehydrator 19/10	NA	NA	80643	NA	1	1		W9A09COLE_IRR	COLE
635	VW2708	114210	2009	1095	3	2	14	W9A09COLE	481	33	90	2	3	IRR	80644	2.4301	mg/g	Yanco Hurricane 19/10	NA	NA	80644	NA	1	1		W9A09COLE_IRR	COLE
636	HRZ06_0270	111014	2009	78	3	2	15	W9A09COLE	239	7	14	1	1	RFD	80645	2.4123	mg/g	Lucerne Dehydrator 20/10	NA	NA	80645	NA	1	1		W9A09COLE_RFD	COLE
637	WAGT020	117687	2009	2860	3	2	16	W9A09YANA	524	27	119	2	4	IRR	80646	1.757	mg/g	Hurricane Dehydrator 13/10/09	NA	NA	80646	NA	1	1		W9A09YANA_IRR	YANA
638	HRZ06_2202	117159	2009	2805	3	2	17	W9A09YANA	274	23	103	2	4	IRR	80647	1.6868	mg/g	Hurricane Dehydrator 13/10/09	NA	NA	80647	82059	1	2		W9A09YANA_IRR	YANA
639	VW0990	114671	2009	1869	3	2	18	W9A09YANA	442	4	47	1	2	RFD	80648	1.2147	mg/g	Lucerne Dehydrator then Leeton Farm 13/10/09	NA	NA	80648	NA	1	1		W9A09YANA_RFD	YANA
640	WW3028_4	116975	2009	2079	3	2	19	W9A09YANA	834	22	47	1	2	RFD	80649	1.3894	mg/g	Lucerne Dehydrator 5/10 - 13/10	NA	NA	80649	NA	1	1		W9A09YANA_RFD	YANA
641	HRZ06_0033	112033	2009	892	3	2	20	W9A09COLE	192	15	73	2	3	IRR	80650	1.2789	mg/g	Lucerne Dehydrator 19/10	NA	NA	80650	NA	1	1		W9A09COLE_IRR	COLE
642	WW14311	115357	2009	2286	3	2	21	W9A09YANA	581	9	93	2	3	RFD	80651	1.0561	mg/g	Lucerne Dehydrator 5/10 - 13/10	NA	NA	80651	NA	1	1		W9A09YANA_RFD	YANA
643	YENDA	110810	2009	407	3	2	22	W9A09COLE	840	5	50	1	2	IRR	80652	1.2003	mg/g	Leeton Hurricane 20/10	NA	NA	80652	83231	1	2		W9A09COLE_IRR	COLE
644	WW19562	114302	2009	1835	3	2	23	W9A09YANA	712	1	62	1	2	RFD	80653	1.0291	mg/g	Lucerne Dehydrator 5/10 - 13/10	NA	NA	80653	NA	1	1		W9A09YANA_RFD	YANA
645	DERRIMUT	114150	2009	365	3	2	24	W9A09COLE	57	33	30	1	1	RFD	80654	1.4184	mg/g	Yanco Hurricane 20/10	NA	NA	80654	NA	1	1		W9A09COLE_RFD	COLE
646	HRZ06_0078	112923	2009	236	3	2	25	W9A09COLE	219	23	3	1	1	RFD	80655	1.7127	mg/g	Yanco Hurricane 20/10	NA	NA	80655	NA	1	1		W9A09COLE_RFD	COLE
647	H45	117276	2009	2466	3	2	26	W9A09YANA	79	24	92	2	3	RFD	80656	1.2597	mg/g	Lucerne Dehydrator then Leeton Farm 13/10/09	NA	NA	80656	81867	1	2		W9A09YANA_RFD	YANA
648	WW20571	117232	2009	2103	3	2	27	W9A09YANA	775	24	48	1	2	RFD	80657	1.5774	mg/g	Lucerne Dehydrator 5/10 - 13/10	NA	NA	80657	NA	1	1		W9A09YANA_RFD	YANA
649	QT13359	112129	2009	540	3	2	28	W9A09COLE	313	16	49	1	2	IRR	80658	0.85154	mg/g	Leeton Hurricane 20/10	NA	NA	80658	NA	1	1		W9A09COLE_IRR	COLE
650	WW19632	117775	2009	2508	3	2	30	W9A09YANA	719	28	79	2	3	RFD	80660	1.0713	mg/g	Lucerne Dehydrator then Leeton Farm 13/10/09	NA	NA	80660	NA	1	1		W9A09YANA_RFD	YANA
651	WW18827	113287	2009	273	3	3	1	W9A09COLE	674	26	7	1	1	RFD	80661	2.1168	mg/g	Yanco Hurricane 20/10	NA	NA	80661	NA	1	1		W9A09COLE_RFD	COLE
652	WW19127	117672	2009	2856	3	3	2	W9A09YANA	694	27	104	2	4	IRR	80662	2.0972	mg/g	Hurricane Dehydrator 13/10/09	NA	NA	80662	82152	1	2		W9A09YANA_IRR	YANA
653	WW19525	115519	2009	2647	3	3	3	W9A09YANA	709	10	127	2	4	IRR	80663	1.6118	mg/g	Hurricane Dehydrator 13/10/09	NA	NA	80663	NA	1	1		W9A09YANA_IRR	YANA
654	HRZ03_0005	117008	2009	2437	3	3	4	W9A09YANA	88	22	80	2	3	RFD	80664	1.4642	mg/g	Lucerne Dehydrator 5/10 - 13/10	NA	NA	80664	NA	1	1		W9A09YANA_RFD	YANA
655	SUN559A	112442	2009	196	3	3	5	W9A09COLE	364	19	2	1	1	RFD	80665	1.7853	mg/g	Lucerne Dehydrator 20/10	NA	NA	80665	NA	1	1		W9A09COLE_RFD	COLE
656	9329_13	115028	2009	1561	3	3	6	W9A09YANA	23	7	20	1	1	IRR	80666	1.4722	mg/g	Lucerne Dehydrator 13/10/09	NA	NA	80666	83143	1	2		W9A09YANA_IRR	YANA
657	WW21873	112871	2009	957	3	3	7	W9A09COLE	832	22	71	2	3	IRR	80667	1.3431	mg/g	Yanco Hurricane 19/10	NA	NA	80667	NA	1	1		W9A09COLE_IRR	COLE
658	HRZ05_0130	111771	2009	509	3	3	8	W9A09COLE	170	13	51	1	2	IRR	80668	1.562	mg/g	Leeton Hurricane 20/10	NA	NA	80668	NA	1	1		W9A09COLE_IRR	COLE
659	DAKOTA	114105	2009	1446	3	3	9	W9A09COLE	56	32	105	2	4	RFD	80669	2.0722	mg/g	Lucerne Dehydrator 19/10	NA	NA	80669	NA	1	1		W9A09COLE_RFD	COLE
660	VW4056	117689	2009	2862	3	3	10	W9A09YANA	514	27	121	2	4	IRR	80670	1.7195	mg/g	Hurricane Dehydrator 13/10/09	NA	NA	80670	82690	1	2		W9A09YANA_IRR	YANA
661	RAC1442	117987	2009	2170	3	3	11	W9A09YANA	333	30	35	1	2	RFD	80671	1.8354	mg/g	Lucerne Dehydrator 5/10 - 13/10	NA	NA	80671	NA	1	1		W9A09YANA_RFD	YANA
662	GILES	113564	2009	676	3	3	12	W9A09COLE	76	28	44	1	2	IRR	80672	1.6434	mg/g	Leeton Hurricane 20/10	NA	NA	80672	NA	1	1		W9A09COLE_IRR	COLE
663	GASCOIGNE	112199	2009	1271	3	3	13	W9A09COLE	71	16	119	2	4	RFD	80673	1.6718	mg/g	Lucerne Dehydrator 19/10	NA	NA	80673	82294	1	2		W9A09COLE_RFD	COLE
664	WW20672	111870	2009	159	3	3	14	W9A09COLE	788	14	30	1	1	RFD	80674	2.0797	mg/g	Lucerne Dehydrator 20/10	NA	NA	80674	NA	1	1		W9A09COLE_RFD	COLE
665	95757_7	110466	2009	744	3	3	15	W9A09COLE	24	2	66	2	3	IRR	80675	2.567	mg/g	Yanco Hurricane 19/10	NA	NA	80675	NA	1	1		W9A09COLE_IRR	COLE
666	VW3789	113215	2009	643	3	3	17	W9A09COLE	512	25	55	1	2	IRR	80677	1.7241	mg/g	Leeton Hurricane 20/10	NA	NA	80677	NA	1	1		W9A09COLE_IRR	COLE
667	CURRAWONG	116631	2009	2406	3	3	18	W9A09YANA	55	19	87	2	3	RFD	80678	1.5049	mg/g	Lucerne Dehydrator 5/10 - 13/10	NA	NA	80678	NA	1	1		W9A09YANA_RFD	YANA
668	WW18569	114921	2009	1896	3	3	19	W9A09YANA	664	6	41	1	2	RFD	80679	1.2934	mg/g	Lucerne Dehydrator 5/10 - 13/10	NA	NA	80679	NA	1	1		W9A09YANA_RFD	YANA
669	WYUNA	116701	2009	1727	3	3	20	W9A09YANA	839	20	29	1	1	IRR	80680	0.67418	mg/g	Lucerne Dehydrator 5/10 - 13/10	NA	NA	80680	NA	1	1		W9A09YANA_IRR	YANA
670	VW3405	117536	2009	2491	3	3	21	W9A09YANA	494	26	96	2	3	RFD	80681	1.0627	mg/g	Lucerne Dehydrator 5/10 - 13/10	NA	NA	80681	NA	1	1		W9A09YANA_RFD	YANA
671	WW20159	117936	2009	2883	3	3	22	W9A09YANA	756	29	112	2	4	IRR	80682	1.4637	mg/g	Hurricane Dehydrator 13/10/09	NA	NA	80682	NA	1	1		W9A09YANA_IRR	YANA
672	AUS33585	111528	2009	481	3	3	23	W9A09COLE	35	11	48	1	2	IRR	80683	1.6212	mg/g	Leeton Hurricane 20/10	NA	NA	80683	81663	1	2		W9A09COLE_IRR	COLE
673	BOLAC	116713	2009	2061	3	3	24	W9A09YANA	49	20	41	1	2	RFD	80684	1.5992	mg/g	Lucerne Dehydrator 5/10 - 13/10	NA	NA	80684	NA	1	1		W9A09YANA_RFD	YANA
674	WW20214	112671	2009	1316	3	3	25	W9A09COLE	758	20	111	2	4	RFD	80685	1.1678	mg/g	Lucerne Dehydrator 19/10	NA	NA	80685	NA	1	1		W9A09COLE_RFD	COLE
675	WW21162	111944	2009	1244	3	3	26	W9A09COLE	806	14	104	2	4	RFD	80686	1.2318	mg/g	Lucerne Dehydrator 19/10	NA	NA	80686	NA	1	1		W9A09COLE_RFD	COLE
676	VW3466	112020	2009	533	3	3	27	W9A09COLE	498	15	60	1	2	IRR	80687	1.4848	mg/g	Leeton Hurricane 20/10	NA	NA	80687	NA	1	1		W9A09COLE_IRR	COLE
677	HRZ06_2087	110934	2009	421	3	3	28	W9A09COLE	266	6	54	1	2	IRR	80688	1.9361	mg/g	Leeton Hurricane 20/10	NA	NA	80688	NA	1	1		W9A09COLE_IRR	COLE
678	GLADIUS	117224	2009	2100	3	3	29	W9A09YANA	77	24	40	1	2	RFD	80689	1.8449	mg/g	Lucerne Dehydrator 5/10 - 13/10	NA	NA	80689	NA	1	1		W9A09YANA_RFD	YANA
679	VW2373	113949	2009	1066	3	3	30	W9A09COLE	468	31	69	2	3	IRR	80690	1.3958	mg/g	Yanco Hurricane 19/10	NA	NA	80690	NA	1	1		W9A09COLE_IRR	COLE
680	SUN559A	110636	2009	1126	3	4	1	W9A09COLE	364	3	116	2	4	RFD	80691	1.1022	mg/g	Lucerne Dehydrator 19/10	NA	NA	80691	82888	1	2		W9A09COLE_RFD	COLE
681	CATALINA	112403	2009	925	3	4	2	W9A09COLE	51	18	83	2	3	IRR	80692	1.7388	mg/g	Yanco Hurricane 19/10	NA	NA	80692	NA	1	1		W9A09COLE_IRR	COLE
682	WW16917	113321	2009	650	3	4	3	W9A09COLE	611	26	41	1	2	IRR	80693	1.8023	mg/g	Leeton Hurricane 20/10	NA	NA	80693	NA	1	1		W9A09COLE_IRR	COLE
683	DRYSDALE	114282	2009	1830	3	4	4	W9A09YANA	59	1	42	1	2	RFD	80694	1.3599	mg/g	Lucerne Dehydrator 13/10/09	NA	NA	80694	83195	1	2		W9A09YANA_RFD	YANA
684	WW21573	113735	2009	1404	3	4	5	W9A09COLE	825	29	95	2	4	RFD	80695	1.3849	mg/g	Lucerne Dehydrator 19/10	NA	NA	80695	NA	1	1	W9A08COLE	W9A09COLE_RFD	COLE
685	RAC1429	116647	2009	2746	3	4	6	W9A09YANA	332	19	103	2	4	IRR	80696	1.8882	mg/g	Hurricane Dehydrator 13/10/09	NA	NA	80696	NA	1	1		W9A09YANA_IRR	YANA
686	VT1022	116984	2009	2084	3	4	7	W9A09YANA	383	22	56	1	2	RFD	80697	1.4521	mg/g	Lucerne Dehydrator 5/10 - 13/10	NA	NA	80697	NA	1	1		W9A09YANA_RFD	YANA
687	WAGT020	116940	2009	1743	3	4	8	W9A09YANA	524	22	12	1	1	IRR	80698	1.5535	mg/g	Lucerne Dehydrator 5/10 - 13/10	NA	NA	80698	82534	1	2		W9A09YANA_IRR	YANA
688	MERINDA	118057	2009	2899	3	4	9	W9A09YANA	297	30	105	2	4	IRR	80699	1.9878	mg/g	Hurricane Dehydrator 13/10/09	NA	NA	80699	NA	1	1		W9A09YANA_IRR	YANA
689	HRZ06_0053	114107	2009	1447	3	4	10	W9A09COLE	205	32	107	2	4	RFD	80700	2.518	mg/g	Lucerne Dehydrator 19/10	NA	NA	80700	NA	1	1		W9A09COLE_RFD	COLE
690	ZEBU	117436	2009	2837	3	4	11	W9A09YANA	841	25	124	2	4	IRR	80701	2.0197	mg/g	Hurricane Dehydrator 13/10/09	NA	NA	80701	81668	1	2		W9A09YANA_IRR	YANA
691	VW3170	115714	2009	2312	3	4	12	W9A09YANA	486	12	66	2	3	RFD	80702	0.81376	mg/g	Lucerne Dehydrator 5/10 - 13/10	NA	NA	80702	NA	1	1		W9A09YANA_RFD	YANA
692	HRZ04_0157	116939	2009	1742	3	4	13	W9A09YANA	118	22	11	1	1	IRR	80703	1.2232	mg/g	Lucerne Dehydrator 5/10 - 13/10	NA	NA	80703	NA	1	1		W9A09YANA_IRR	YANA
693	HRZ04_0111	114381	2009	1481	3	4	14	W9A09YANA	107	2	13	1	1	IRR	80704	1.378	mg/g	Lucerne Dehydrator 5/10 - 13/10	NA	NA	80704	NA	1	1		W9A09YANA_IRR	YANA
694	HRZ04_0421	113326	2009	653	3	4	15	W9A09COLE	147	26	46	1	2	IRR	80705	1.9154	mg/g	Leeton Hurricane 20/10	NA	NA	80705	NA	1	1		W9A09COLE_IRR	COLE
695	SUNVALE	112410	2009	927	3	4	16	W9A09COLE	373	18	90	2	3	IRR	80706	1.4132	mg/g	Yanco Hurricane 19/10	NA	NA	80706	NA	1	1		W9A09COLE_IRR	COLE
696	WW18805	116300	2009	1695	3	4	17	W9A09YANA	673	17	12	1	1	IRR	80707	1.1	mg/g	Lucerne Dehydrator 5/10 - 13/10	NA	NA	80707	NA	1	1		W9A09YANA_IRR	YANA
697	WW3028_4	111159	2009	440	3	4	18	W9A09COLE	834	8	39	1	2	IRR	80708	1.6038	mg/g	Leeton Hurricane 20/10	NA	NA	80708	82642	1	2		W9A09COLE_IRR	COLE
698	IRENA/BABAX//PASTOR	116431	2009	1708	3	4	19	W9A09YANA	277	18	15	1	1	IRR	80709	1.71	mg/g	Lucerne Dehydrator 5/10 - 13/10	NA	NA	80709	NA	1	1		W9A09YANA_IRR	YANA
699	VW3707	118042	2009	2538	3	4	20	W9A09YANA	505	30	90	2	3	RFD	80710	1.0998	mg/g	Lucerne Dehydrator 5/10 - 13/10	NA	NA	80710	82861	1	2		W9A09YANA_RFD	YANA
700	WW9696	112712	2009	591	3	4	21	W9A09COLE	837	21	32	1	2	IRR	80711	2.2773	mg/g	Leeton Hurricane 20/10	NA	NA	80711	NA	1	1		W9A09COLE_IRR	COLE
701	HRZ06_0299	113560	2009	673	3	4	22	W9A09COLE	244	28	40	1	2	IRR	80712	1.711	mg/g	Leeton Hurricane 20/10	NA	NA	80712	NA	1	1		W9A09COLE_IRR	COLE
702	WW18919	115926	2009	1664	3	4	24	W9A09YANA	682	14	22	1	1	IRR	80714	1.2066	mg/g	Lucerne Dehydrator 5/10 - 13/10	NA	NA	80714	NA	1	1		W9A09YANA_IRR	YANA
703	GBA0608	114031	2009	710	3	4	25	W9A09COLE	73	32	31	1	2	IRR	80715	2.5857	mg/g	Leeton Hurricane 20/10	NA	NA	80715	NA	1	1		W9A09COLE_IRR	COLE
704	WW19891	111252	2009	101	3	4	26	W9A09COLE	746	9	12	1	1	RFD	80716	1.9624	mg/g	Lucerne Dehydrator 20/10	NA	NA	80716	NA	1	1		W9A09COLE_RFD	COLE
705	VW0823	112373	2009	563	3	4	27	W9A09COLE	439	18	53	1	2	IRR	80717	1.0513	mg/g	Leeton Hurricane 20/10	NA	NA	80717	82312	1	2		W9A09COLE_IRR	COLE
706	WW20527	113741	2009	1407	3	4	28	W9A09COLE	772	29	101	2	4	RFD	80718	1.9546	mg/g	Lucerne Dehydrator 19/10	NA	NA	80718	NA	1	1		W9A09COLE_RFD	COLE
707	WW16367	117446	2009	1766	3	4	29	W9A09YANA	604	26	6	1	1	IRR	80719	1.488	mg/g	Lucerne Dehydrator 5/10 - 13/10	NA	NA	80719	NA	1	1		W9A09YANA_IRR	YANA
708	HRZ04_0513	111482	2009	115	3	4	30	W9A09COLE	152	11	2	1	1	RFD	80720	1.2039	mg/g	Lucerne Dehydrator 20/10	NA	NA	80720	NA	1	1		W9A09COLE_RFD	COLE
709	VV2678	111356	2009	1192	3	5	1	W9A09COLE	408	9	116	2	4	RFD	80721	1.5765	mg/g	Lucerne Dehydrator 19/10	NA	NA	80721	NA	1	1		W9A09COLE_RFD	COLE
710	HRZ05_0159	113513	2009	1385	3	5	2	W9A09COLE	182	27	113	2	4	RFD	80722	1.8089	mg/g	Lucerne Dehydrator 19/10	NA	NA	80722	NA	1	1		W9A09COLE_RFD	COLE
711	VW1190	116174	2009	1688	3	5	3	W9A09YANA	447	16	14	1	1	IRR	80723	1.2881	mg/g	Lucerne Dehydrator 13/10/09	NA	NA	80723	82960	1	2		W9A09YANA_IRR	YANA
712	VT2474	115797	2009	1650	3	5	4	W9A09YANA	387	13	21	1	1	IRR	80724	1.5278	mg/g	Lucerne Dehydrator 5/10 - 13/10	NA	NA	80724	NA	1	1		W9A09YANA_IRR	YANA
713	EGA_JAEGER	115671	2009	1634	3	5	5	W9A09YANA	63	12	23	1	1	IRR	80725	1.6675	mg/g	Hurricane Dehydrator 13/10/09	NA	NA	80725	NA	1	1		W9A09YANA_IRR	YANA
714	WW19548	118164	2009	2550	3	5	6	W9A09YANA	710	31	84	2	3	RFD	80726	0.93144	mg/g	Lucerne Dehydrator 5/10 - 13/10	NA	NA	80726	NA	1	1		W9A09YANA_RFD	YANA
715	VW4355	116043	2009	1674	3	5	7	W9A09YANA	520	15	11	1	1	IRR	80727	1.3494	mg/g	Lucerne Dehydrator 13/10/09	NA	NA	80727	NA	1	1		W9A09YANA_IRR	YANA
716	WW19662	111749	2009	147	3	5	8	W9A09COLE	726	13	29	1	1	RFD	80728	1.8148	mg/g	Lucerne Dehydrator 20/10	NA	NA	80728	NA	1	1		W9A09COLE_RFD	COLE
717	WW19147	114528	2009	1509	3	5	9	W9A09YANA	695	3	32	1	1	IRR	80729	1.1072	mg/g	Lucerne Dehydrator 13/10/09	NA	NA	80729	82741	1	2		W9A09YANA_IRR	YANA
718	WW21842	115058	2009	1915	3	5	10	W9A09YANA	829	7	50	1	2	RFD	80730	1.5108	mg/g	Lucerne Dehydrator 5/10 - 13/10	NA	NA	80730	NA	1	1		W9A09YANA_RFD	YANA
719	VW0779	115803	2009	1655	3	5	11	W9A09YANA	437	13	27	1	1	IRR	80731	1.9293	mg/g	Lucerne Dehydrator 5/10 - 13/10	NA	NA	80731	NA	1	1		W9A09YANA_IRR	YANA
720	LPB04_2172	111438	2009	837	3	5	12	W9A09COLE	283	10	78	2	3	IRR	80732	1.8854	mg/g	Lucerne Dehydrator 19/10	NA	NA	80732	NA	1	1		W9A09COLE_IRR	COLE
721	DERRIMUT	117011	2009	2438	3	5	13	W9A09YANA	57	22	83	2	3	RFD	80733	0.6964	mg/g	Lucerne Dehydrator 5/10 - 13/10	NA	NA	80733	NA	1	1		W9A09YANA_RFD	YANA
722	SUNBRI	116601	2009	2054	3	5	14	W9A09YANA	372	19	57	1	2	RFD	80734	1.6905	mg/g	Lucerne Dehydrator then Leeton Farm 13/10/09	NA	NA	80734	NA	1	1		W9A09YANA_RFD	YANA
723	WW19665	117851	2009	1807	3	5	15	W9A09YANA	728	29	27	1	1	IRR	80735	1.3451	mg/g	Lucerne Dehydrator 5/10 - 13/10	NA	NA	80735	82162	1	2		W9A09YANA_IRR	YANA
724	HRZ04_0161	111179	2009	450	3	5	16	W9A09COLE	119	8	59	1	2	IRR	80736	1.497	mg/g	Leeton Hurricane 20/10	NA	NA	80736	NA	1	1		W9A09COLE_IRR	COLE
725	VW0760	111824	2009	1232	3	5	17	W9A09COLE	436	13	104	2	4	RFD	80737	1.077	mg/g	Lucerne Dehydrator 19/10	NA	NA	80737	NA	1	1		W9A09COLE_RFD	COLE
726	HRZ04_0191	114645	2009	1520	3	5	18	W9A09YANA	122	4	21	1	1	IRR	80738	0.98788	mg/g	Lucerne Dehydrator 13/10/09	NA	NA	80738	NA	1	1		W9A09YANA_IRR	YANA
727	VW1152	111565	2009	848	3	5	19	W9A09COLE	444	11	85	2	3	IRR	80739	1.4038	mg/g	Lucerne Dehydrator 19/10	NA	NA	80739	NA	1	1		W9A09COLE_IRR	COLE
728	HRZ04_0154	112366	2009	559	3	5	20	W9A09COLE	115	18	46	1	2	IRR	80740	2.1625	mg/g	Leeton Hurricane 20/10	NA	NA	80740	NA	1	1		W9A09COLE_IRR	COLE
729	HRZ04_0354	117602	2009	2135	3	5	21	W9A09YANA	142	27	34	1	2	RFD	80741	1.352	mg/g	Lucerne Dehydrator then Leeton Farm 13/10/09	NA	NA	80741	81777	1	2		W9A09YANA_RFD	YANA
730	VW4192	117754	2009	2154	3	5	22	W9A09YANA	518	28	58	1	2	RFD	80742	1.6741	mg/g	Lucerne Dehydrator 5/10 - 13/10	NA	NA	80742	NA	1	1		W9A09YANA_RFD	YANA
731	WYLAH	111810	2009	875	3	5	23	W9A09COLE	838	13	90	2	3	IRR	80743	1.0043	mg/g	Lucerne Dehydrator 19/10	NA	NA	80743	NA	1	1		W9A09COLE_IRR	COLE
732	WW20664	114882	2009	1539	3	5	24	W9A09YANA	785	6	2	1	1	IRR	80744	1.5973	mg/g	Lucerne Dehydrator 5/10 - 13/10	NA	NA	80744	NA	1	1		W9A09YANA_IRR	YANA
733	WW13773	115422	2009	1605	3	5	25	W9A09YANA	570	10	30	1	1	IRR	80745	1.3532	mg/g	Lucerne Dehydrator 13/10/09	NA	NA	80745	83268	1	2		W9A09YANA_IRR	YANA
734	WW20577	110565	2009	392	3	5	26	W9A09COLE	776	3	45	1	2	IRR	80746	1.064	mg/g	Leeton Hurricane 20/10	NA	NA	80746	NA	1	1		W9A09COLE_IRR	COLE
735	HRZ06_2082	110942	2009	784	3	5	27	W9A09COLE	265	6	62	2	3	IRR	80747	1.461	mg/g	Lucerne Dehydrator 19/10	NA	NA	80747	NA	1	1		W9A09COLE_IRR	COLE
736	WW18925	116370	2009	2378	3	5	28	W9A09YANA	685	17	82	2	3	RFD	80748	1.0376	mg/g	Lucerne Dehydrator 5/10 - 13/10	NA	NA	80748	81657	1	2		W9A09YANA_RFD	YANA
737	114892_109	117456	2009	1768	3	5	29	W9A09YANA	2	26	16	1	1	IRR	80749	1.6015	mg/g	Lucerne Dehydrator then Leeton Farm 13/10/09	NA	NA	80749	NA	1	1		W9A09YANA_IRR	YANA
738	HRZ06_0183	112913	2009	1345	3	5	30	W9A09COLE	226	22	113	2	4	RFD	80750	1.6725	mg/g	Lucerne Dehydrator 19/10	NA	NA	80750	NA	1	1		W9A09COLE_RFD	COLE
739	QT12667	110429	2009	23	3	6	1	W9A09COLE	303	2	29	1	1	RFD	80751	1.513	mg/g	Yanco Hurricane 20/10	NA	NA	80751	NA	1	1		W9A09COLE_RFD	COLE
740	WW19490	111988	2009	168	3	6	2	W9A09COLE	704	15	28	1	1	RFD	80752	2.0746	mg/g	Lucerne Dehydrator 20/10	NA	NA	80752	82515	1	2		W9A09COLE_RFD	COLE
741	WW20652	113473	2009	1018	3	6	3	W9A09COLE	784	27	73	2	3	IRR	80753	1.7323	mg/g	Yanco Hurricane 19/10	NA	NA	80753	NA	1	1		W9A09COLE_IRR	COLE
742	HRZ06_0147	112336	2009	192	3	6	4	W9A09COLE	224	18	16	1	1	RFD	80754	1.6349	mg/g	Lucerne Dehydrator 20/10	NA	NA	80754	NA	1	1		W9A09COLE_RFD	COLE
743	B1272T	110714	2009	764	3	6	5	W9A09COLE	44	4	74	2	3	IRR	80755	2.373	mg/g	Yanco Hurricane 19/10	NA	NA	80755	82159	1	2		W9A09COLE_IRR	COLE
744	WW20256	113705	2009	1036	3	6	6	W9A09COLE	759	29	65	2	3	IRR	80756	1.3449	mg/g	Yanco Hurricane 19/10	NA	NA	80756	NA	1	1		W9A09COLE_IRR	COLE
745	LINCOLN	115375	2009	2627	3	6	7	W9A09YANA	280	9	111	2	4	IRR	80757	1.6017	mg/g	Hurricane Dehydrator 13/10/09	NA	NA	80269	80757	1	2		W9A09YANA_IRR	YANA
746	WW19660	115209	2009	2267	3	6	8	W9A09YANA	724	8	73	2	3	RFD	80758	0.79706	mg/g	Lucerne Dehydrator 5/10 - 13/10	NA	NA	80758	NA	1	1		W9A09YANA_RFD	YANA
747	WYLAH	117459	2009	1769	3	6	9	W9A09YANA	838	26	19	1	1	IRR	80759	0.54455	mg/g	Lucerne Dehydrator 5/10 - 13/10	NA	NA	80759	NA	1	1		W9A09YANA_IRR	YANA
748	RAC1442	114700	2009	2219	3	6	10	W9A09YANA	333	4	76	2	3	RFD	80760	1.6704	mg/g	Lucerne Dehydrator 5/10 - 13/10	NA	NA	80760	NA	1	1		W9A09YANA_RFD	YANA
749	HRZ04_0154	115609	2009	2306	3	6	11	W9A09YANA	115	11	89	2	3	RFD	80761	1.4708	mg/g	Lucerne Dehydrator 5/10 - 13/10	NA	NA	80761	NA	1	1		W9A09YANA_RFD	YANA
750	RAC1451	117833	2009	1800	3	6	12	W9A09YANA	335	29	9	1	1	IRR	80762	1.3771	mg/g	Lucerne Dehydrator 5/10 - 13/10	NA	NA	80762	82415	1	2		W9A09YANA_IRR	YANA
751	WAGT025	111901	2009	876	3	6	13	W9A09COLE	527	14	61	2	3	IRR	80763	1.9443	mg/g	Lucerne Dehydrator 19/10	NA	NA	80763	NA	1	1		W9A09COLE_IRR	COLE
752	VW3473	112990	2009	970	3	6	14	W9A09COLE	500	23	70	2	3	IRR	80764	1.6628	mg/g	Yanco Hurricane 19/10	NA	NA	80764	NA	1	1		W9A09COLE_IRR	COLE
753	VW1864	111437	2009	836	3	6	15	W9A09COLE	458	10	77	2	3	IRR	80765	1.5343	mg/g	Lucerne Dehydrator 19/10	NA	NA	80765	NA	1	1		W9A09COLE_IRR	COLE
754	VT2474	114428	2009	1847	3	6	16	W9A09YANA	387	2	60	1	2	RFD	80766	1.7295	mg/g	Hurricane Dehydrator 13/10/09	NA	NA	80766	NA	1	1		W9A09YANA_RFD	YANA
755	VW3466	111475	2009	1203	3	6	17	W9A09COLE	498	10	115	2	4	RFD	80767	1.3547	mg/g	Lucerne Dehydrator 19/10	NA	NA	80767	NA	1	1		W9A09COLE_RFD	COLE
756	VW3195	111965	2009	161	3	6	18	W9A09COLE	488	15	5	1	1	RFD	80768	1.7249	mg/g	Lucerne Dehydrator 20/10	NA	NA	80768	NA	1	1		W9A09COLE_RFD	COLE
757	VW3595	111679	2009	860	3	6	19	W9A09COLE	503	12	79	2	3	IRR	80769	1.4724	mg/g	Lucerne Dehydrator 19/10	NA	NA	80769	83221	1	2		W9A09COLE_IRR	COLE
758	VW0241	113772	2009	320	3	6	20	W9A09COLE	419	30	12	1	1	RFD	80770	2.1097	mg/g	Yanco Hurricane 20/10	NA	NA	80770	NA	1	1		W9A09COLE_RFD	COLE
759	VT1020	111032	2009	424	3	6	21	W9A09COLE	382	7	32	1	2	IRR	80771	1.966	mg/g	Leeton Hurricane 20/10	NA	NA	80771	NA	1	1		W9A09COLE_IRR	COLE
760	LPB03_1109	116586	2009	2047	3	6	22	W9A09YANA	282	19	42	1	2	RFD	80772	1.1639	mg/g	Lucerne Dehydrator then Leeton Farm 13/10/09	NA	NA	80772	NA	1	1		W9A09YANA_RFD	YANA
761	VW4192	117157	2009	2804	3	6	23	W9A09YANA	518	23	101	2	4	IRR	80773	1.8154	mg/g	Hurricane Dehydrator 13/10/09	NA	NA	80773	NA	1	1		W9A09YANA_IRR	YANA
762	WAWHT3016	116712	2009	2060	3	6	24	W9A09YANA	545	20	40	1	2	RFD	80774	1.39	mg/g	Lucerne Dehydrator 5/10 - 13/10	NA	NA	80774	82110	1	2		W9A09YANA_RFD	YANA
763	VU3750	111714	2009	1224	3	6	25	W9A09COLE	393	12	114	2	4	RFD	80775	1.1738	mg/g	Lucerne Dehydrator 19/10	NA	NA	80775	NA	1	1		W9A09COLE_RFD	COLE
764	WW19490	114239	2009	1460	3	6	26	W9A09COLE	704	33	119	2	4	RFD	80776	2.8318	mg/g	Lucerne Dehydrator 19/10	NA	NA	80776	NA	1	1		W9A09COLE_RFD	COLE
765	HRZ03_0062	114938	2009	1901	3	6	27	W9A09YANA	98	6	58	1	2	RFD	80777	1.4266	mg/g	Lucerne Dehydrator 5/10 - 13/10	NA	NA	80777	NA	1	1		W9A09YANA_RFD	YANA
766	LPB04_2238	118030	2009	2532	3	6	28	W9A09YANA	284	30	78	2	3	RFD	80778	1.4537	mg/g	Lucerne Dehydrator 5/10 - 13/10	NA	NA	80778	NA	1	1		W9A09YANA_RFD	YANA
767	GILES	114110	2009	1449	3	6	29	W9A09COLE	76	32	110	2	4	RFD	80779	2.1097	mg/g	Lucerne Dehydrator 19/10	NA	NA	80779	NA	1	1		W9A09COLE_RFD	COLE
768	WW20096	118166	2009	2551	3	6	30	W9A09YANA	754	31	86	2	3	RFD	80780	0.95477	mg/g	Lucerne Dehydrator 5/10 - 13/10	NA	NA	80780	82583	1	2		W9A09YANA_RFD	YANA
769	WW19891	114941	2009	1903	3	7	1	W9A09YANA	746	6	61	1	2	RFD	80781	1.4803	mg/g	Lucerne Dehydrator 5/10 - 13/10	NA	NA	80781	NA	1	1		W9A09YANA_RFD	YANA
770	VW1864	113526	2009	299	3	7	2	W9A09COLE	458	28	6	1	1	RFD	80782	1.9469	mg/g	Yanco Hurricane 20/10	NA	NA	80782	NA	1	1		W9A09COLE_RFD	COLE
771	B1272T	116329	2009	2027	3	7	3	W9A09YANA	44	17	41	1	2	RFD	80783	2.0357	mg/g	Lucerne Dehydrator then Leeton Farm 13/10/09	NA	NA	80783	NA	1	1		W9A09YANA_RFD	YANA
772	HRZ06_0145	111295	2009	462	3	7	4	W9A09COLE	223	9	55	1	2	IRR	80784	1.6495	mg/g	Leeton Hurricane 20/10	NA	NA	80784	81832	1	2		W9A09COLE_IRR	COLE
773	WW20527	117491	2009	2128	3	7	5	W9A09YANA	772	26	51	1	2	RFD	80785	1.0631	mg/g	Lucerne Dehydrator 5/10 - 13/10	NA	NA	80785	NA	1	1		W9A09YANA_RFD	YANA
774	WW21843	117918	2009	2527	3	7	6	W9A09YANA	830	29	94	2	3	RFD	80786	0.81466	mg/g	Lucerne Dehydrator then Leeton Farm 13/10/09	NA	NA	80786	NA	1	1		W9A09YANA_RFD	YANA
775	HRZ06_0292	112857	2009	613	3	7	7	W9A09COLE	243	22	57	1	2	IRR	80787	2.0994	mg/g	Leeton Hurricane 20/10	NA	NA	80787	NA	1	1		W9A09COLE_IRR	COLE
776	RAC1398	113377	2009	1368	3	7	8	W9A09COLE	326	26	97	2	4	RFD	80788	1.9705	mg/g	Lucerne Dehydrator 19/10	NA	NA	80788	NA	1	1		W9A09COLE_RFD	COLE
777	AUS33466	114560	2009	1864	3	7	9	W9A09YANA	27	3	64	1	2	RFD	80789	1.6323	mg/g	Lucerne Dehydrator 5/10 - 13/10	NA	NA	80789	NA	1	1		W9A09YANA_RFD	YANA
778	QT13359	111133	2009	87	3	7	10	W9A09COLE	313	8	13	1	1	RFD	80790	2.1293	mg/g	Lucerne Dehydrator 20/10	NA	NA	80790	82869	1	2		W9A09COLE_RFD	COLE
779	VV2401	114945	2009	2238	3	7	11	W9A09YANA	407	6	65	2	3	RFD	80791	1.4174	mg/g	Lucerne Dehydrator 5/10 - 13/10	NA	NA	80791	NA	1	1		W9A09YANA_RFD	YANA
780	WW19743	117862	2009	2159	3	7	12	W9A09YANA	735	29	38	1	2	RFD	80792	1.3274	mg/g	Lucerne Dehydrator 5/10 - 13/10	NA	NA	80792	NA	1	1		W9A09YANA_RFD	YANA
781	WW16452	113348	2009	1002	3	7	13	W9A09COLE	608	26	68	2	3	IRR	80793	1.7614	mg/g	Yanco Hurricane 19/10	NA	NA	80793	82816	1	2		W9A09COLE_IRR	COLE
782	WW18805	115820	2009	1985	3	7	14	W9A09YANA	673	13	44	1	2	RFD	80794	1.3467	mg/g	Lucerne Dehydrator then Leeton Farm 13/10/09	NA	NA	80794	NA	1	1		W9A09YANA_RFD	YANA
783	WW19682	116450	2009	2035	3	7	15	W9A09YANA	730	18	34	1	2	RFD	80795	1.6863	mg/g	Lucerne Dehydrator 5/10 - 13/10	NA	NA	80795	NA	1	1		W9A09YANA_RFD	YANA
784	VW2694	117168	2009	2808	3	7	16	W9A09YANA	479	23	112	2	4	IRR	80796	2.1597	mg/g	Hurricane Dehydrator 13/10/09	NA	NA	80796	NA	1	1		W9A09YANA_IRR	YANA
785	RAC1398	116080	2009	2012	3	7	17	W9A09YANA	326	15	48	1	2	RFD	80797	1.6105	mg/g	Lucerne Dehydrator 5/10 - 13/10	NA	NA	80797	82298	1	2		W9A09YANA_RFD	YANA
786	WW20558	115624	2009	2649	3	7	18	W9A09YANA	774	11	104	2	4	IRR	80798	1.31	mg/g	Hurricane Dehydrator 13/10/09	NA	NA	80798	NA	1	1		W9A09YANA_IRR	YANA
787	WW19513	116605	2009	2057	3	7	20	W9A09YANA	707	19	61	1	2	RFD	80800	1.2657	mg/g	Hurricane Dehydrator 13/10/09	NA	NA	80800	NA	1	1		W9A09YANA_RFD	YANA
788	AUS33585	113537	2009	302	3	7	21	W9A09COLE	35	28	17	1	1	RFD	80801	2.1201	mg/g	Yanco Hurricane 20/10	NA	NA	80801	NA	1	1		W9A09COLE_RFD	COLE
789	VW2705	110592	2009	754	3	7	22	W9A09COLE	480	3	72	2	3	IRR	80802	2.333	mg/g	Lucerne Dehydrator 19/10	NA	NA	80802	81886	1	2		W9A09COLE_IRR	COLE
790	WW20214	115567	2009	1964	3	7	23	W9A09YANA	758	11	47	1	2	RFD	80803	1.3349	mg/g	Lucerne Dehydrator 5/10 - 13/10	NA	NA	80803	NA	1	1		W9A09YANA_RFD	YANA
791	WW19866	117153	2009	2802	3	7	24	W9A09YANA	742	23	97	2	4	IRR	80804	1.8205	mg/g	Hurricane Dehydrator 13/10/09	NA	NA	80804	NA	1	1		W9A09YANA_IRR	YANA
792	HRZ06_0079	113327	2009	654	3	7	25	W9A09COLE	220	26	47	1	2	IRR	80805	1.326	mg/g	Leeton Hurricane 20/10	NA	NA	80805	NA	1	1		W9A09COLE_IRR	COLE
793	GBA0608	112921	2009	234	3	7	26	W9A09COLE	73	23	1	1	1	RFD	80806	1.8295	mg/g	Yanco Hurricane 20/10	NA	NA	80806	NA	1	1		W9A09COLE_RFD	COLE
794	VT1022	112630	2009	941	3	7	27	W9A09COLE	383	20	70	2	3	IRR	80807	1.7786	mg/g	Yanco Hurricane 19/10	NA	NA	80807	82762	1	2		W9A09COLE_IRR	COLE
795	WW20527	117543	2009	2845	3	7	28	W9A09YANA	772	26	103	2	4	IRR	80808	1.4785	mg/g	Hurricane Dehydrator 13/10/09	NA	NA	80808	NA	1	1		W9A09YANA_IRR	YANA
796	WW19514	111415	2009	474	3	7	29	W9A09COLE	708	10	55	1	2	IRR	80809	1.9206	mg/g	Leeton Hurricane 20/10	NA	NA	80809	NA	1	1		W9A09COLE_IRR	COLE
797	VW0379	113256	2009	1358	3	7	30	W9A09COLE	425	25	96	2	4	RFD	80810	1.1203	mg/g	Lucerne Dehydrator 19/10	NA	NA	80810	NA	1	1		W9A09COLE_RFD	COLE
798	WAGT025	110559	2009	389	3	8	1	W9A09COLE	527	3	39	1	2	IRR	80811	1.5626	mg/g	Leeton Hurricane 20/10	NA	NA	80811	82004	1	2		W9A09COLE_IRR	COLE
799	WW18924	113354	2009	1004	3	8	2	W9A09COLE	684	26	74	2	3	IRR	80812	1.9576	mg/g	Yanco Hurricane 19/10	NA	NA	80812	NA	1	1		W9A09COLE_IRR	COLE
800	WW20406	116288	2009	2713	3	8	3	W9A09YANA	767	16	128	2	4	IRR	80813	1.5706	mg/g	Hurricane Dehydrator 13/10/09	NA	NA	80813	NA	1	1		W9A09YANA_IRR	YANA
801	WW13710	111628	2009	133	3	8	4	W9A09COLE	567	12	28	1	1	RFD	80814	1.4571	mg/g	Lucerne Dehydrator 20/10	NA	NA	80814	NA	1	1		W9A09COLE_RFD	COLE
802	LPB04_2386_1302	117511	2009	2480	3	8	5	W9A09YANA	291	26	71	2	3	RFD	80815	1.8695	mg/g	Lucerne Dehydrator 5/10 - 13/10	NA	NA	80815	NA	1	1		W9A09YANA_RFD	YANA
803	EGA_WILLS	115335	2009	2278	3	8	6	W9A09YANA	66	9	71	2	3	RFD	80816	1.3667	mg/g	Lucerne Dehydrator 5/10 - 13/10	NA	NA	80816	NA	1	1		W9A09YANA_RFD	YANA
804	WW19987	113276	2009	1364	3	8	7	W9A09COLE	752	25	116	2	4	RFD	80817	1.6629	mg/g	Lucerne Dehydrator 19/10	NA	NA	80817	NA	1	1		W9A09COLE_RFD	COLE
805	HRZ06_0319	114155	2009	720	3	8	8	W9A09COLE	246	33	35	1	2	IRR	80818	2.4709	mg/g	Leeton Hurricane 20/10	NA	NA	80818	82645	1	2		W9A09COLE_IRR	COLE
806	7896_254	112847	2009	608	3	8	9	W9A09COLE	16	22	47	1	2	IRR	80819	2.7451	mg/g	Leeton Hurricane 20/10	NA	NA	80819	NA	1	1		W9A09COLE_IRR	COLE
807	HRZ06_0250	111756	2009	500	3	8	10	W9A09COLE	232	13	36	1	2	IRR	80820	1.2304	mg/g	Leeton Hurricane 20/10	NA	NA	80820	NA	1	1		W9A09COLE_IRR	COLE
808	ELLISON	110288	2009	5	3	8	11	W9A09COLE	67	1	8	1	1	RFD	80821	2.7005	mg/g	Yanco Hurricane 20/10	NA	NA	80821	NA	1	1		W9A09COLE_RFD	COLE
809	HRZ06_0265	117264	2009	2462	3	8	12	W9A09YANA	237	24	80	2	3	RFD	80822	2.0496	mg/g	Hurricane Dehydrator 13/10/09	NA	NA	80822	NA	1	1		W9A09YANA_RFD	YANA
810	WW19753	117467	2009	1774	3	8	13	W9A09YANA	738	26	27	1	1	IRR	80823	1.3021	mg/g	Lucerne Dehydrator 5/10 - 13/10	NA	NA	80823	NA	1	1		W9A09YANA_IRR	YANA
811	HRZ04_0111	114667	2009	1868	3	8	14	W9A09YANA	107	4	43	1	2	RFD	80824	1.5533	mg/g	Lucerne Dehydrator then Leeton Farm 13/10/09	NA	NA	80824	81774	1	2		W9A09YANA_RFD	YANA
812	WYLAH	112435	2009	1293	3	8	15	W9A09COLE	838	18	115	2	4	RFD	80825	2.0868	mg/g	Lucerne Dehydrator 19/10	NA	NA	80825	NA	1	1		W9A09COLE_RFD	COLE
813	WW21859	113727	2009	1049	3	8	16	W9A09COLE	831	29	87	2	3	IRR	80826	1.0197	mg/g	Yanco Hurricane 19/10	NA	NA	80826	83158	1	2		W9A09COLE_IRR	COLE
814	WAGT020	114787	2009	1879	3	8	17	W9A09YANA	524	5	35	1	2	RFD	80827	1.478	mg/g	Lucerne Dehydrator 5/10 - 13/10	NA	NA	80827	NA	1	1		W9A09YANA_RFD	YANA
815	WW18949	110834	2009	779	3	8	18	W9A09COLE	688	5	74	2	3	IRR	80828	1.7886	mg/g	Lucerne Dehydrator 19/10	NA	NA	80828	NA	1	1		W9A09COLE_IRR	COLE
816	VW3595	110787	2009	64	3	8	19	W9A09COLE	503	5	27	1	1	RFD	80829	1.7859	mg/g	Lucerne Dehydrator 20/10	NA	NA	80829	NA	1	1		W9A09COLE_RFD	COLE
817	EGA_GREGORY	117573	2009	1778	3	8	20	W9A09YANA	62	27	5	1	1	IRR	80830	0.9547	mg/g	Lucerne Dehydrator 5/10 - 13/10	NA	NA	80830	NA	1	1		W9A09YANA_IRR	YANA
818	VW0720	116528	2009	2735	3	8	21	W9A09YANA	434	18	112	2	4	IRR	80831	1.7702	mg/g	Hurricane Dehydrator 13/10/09	NA	NA	80831	NA	1	1		W9A09YANA_IRR	YANA
819	HRZ04_0231	112027	2009	888	3	8	23	W9A09COLE	131	15	67	2	3	IRR	80833	2.1771	mg/g	Lucerne Dehydrator 19/10	NA	NA	80833	82116	1	2		W9A09COLE_IRR	COLE
820	WAGT025	117118	2009	2096	3	8	24	W9A09YANA	527	23	62	1	2	RFD	80834	1.7442	mg/g	Lucerne Dehydrator 5/10 - 13/10	NA	NA	80834	NA	1	1		W9A09YANA_RFD	YANA
821	HRZ06_2082	110648	2009	39	3	8	25	W9A09COLE	265	4	8	1	1	RFD	80835	1.503	mg/g	Lucerne Dehydrator 20/10	NA	NA	80835	NA	1	1		W9A09COLE_RFD	COLE
822	WW19562	117531	2009	2489	3	8	26	W9A09YANA	712	26	91	2	3	RFD	80836	1.0536	mg/g	Lucerne Dehydrator 5/10 - 13/10	NA	NA	80836	81855	1	2		W9A09YANA_RFD	YANA
823	HRZ05_0101	116127	2009	2361	3	8	27	W9A09YANA	161	15	95	2	3	RFD	80837	1.4968	mg/g	Lucerne Dehydrator then Leeton Farm 13/10/09	NA	NA	80837	NA	1	1		W9A09YANA_RFD	YANA
824	WW18049	116365	2009	2375	3	8	28	W9A09YANA	626	17	77	2	3	RFD	80838	0.92147	mg/g	Lucerne Dehydrator 5/10 - 13/10	NA	NA	80838	NA	1	1		W9A09YANA_RFD	YANA
825	HRZ06_0057	114108	2009	1448	3	8	29	W9A09COLE	207	32	108	2	4	RFD	80839	2.2328	mg/g	Lucerne Dehydrator 19/10	NA	NA	80839	83190	1	2		W9A09COLE_RFD	COLE
826	WW21842	117006	2009	2436	3	8	30	W9A09YANA	829	22	78	2	3	RFD	80840	1.364	mg/g	Lucerne Dehydrator then Leeton Farm 13/10/09	NA	NA	80840	NA	1	1		W9A09YANA_RFD	YANA
827	WW19891	117973	2009	1817	3	9	1	W9A09YANA	746	30	21	1	1	IRR	80841	1.3565	mg/g	Lucerne Dehydrator 5/10 - 13/10	NA	NA	80841	NA	1	1		W9A09YANA_IRR	YANA
828	VT1308	117835	2009	1802	3	9	2	W9A09YANA	386	29	11	1	1	IRR	80842	1.2003	mg/g	Lucerne Dehydrator 5/10 - 13/10	NA	NA	80842	NA	1	1		W9A09YANA_IRR	YANA
829	SUN525D	116823	2009	1735	3	9	3	W9A09YANA	354	21	23	1	1	IRR	80843	1.3701	mg/g	Lucerne Dehydrator 5/10 - 13/10	NA	NA	80843	82610	1	2		W9A09YANA_IRR	YANA
830	HRZ06_0292	113428	2009	296	3	9	4	W9A09COLE	243	27	28	1	1	RFD	80844	2.9639	mg/g	Yanco Hurricane 20/10	NA	NA	80844	NA	1	1		W9A09COLE_RFD	COLE
831	WW21859	111819	2009	1229	3	9	5	W9A09COLE	831	13	99	2	4	RFD	80845	0.92004	mg/g	Lucerne Dehydrator 19/10	NA	NA	80845	NA	1	1		W9A09COLE_RFD	COLE
832	WW18769	112739	2009	594	3	9	6	W9A09COLE	668	21	59	1	2	IRR	80846	1.9807	mg/g	Leeton Hurricane 20/10	NA	NA	80846	82168	1	2		W9A09COLE_IRR	COLE
833	LPB04_2238	116290	2009	1692	3	9	7	W9A09YANA	284	17	2	1	1	IRR	80847	1.3566	mg/g	Lucerne Dehydrator 5/10 - 13/10	NA	NA	80847	NA	1	1		W9A09YANA_IRR	YANA
834	ROSELLA	116001	2009	2680	3	9	8	W9A09YANA	346	14	97	2	4	IRR	80848	0.40888	mg/g	Hurricane Dehydrator 13/10/09	NA	NA	80848	NA	1	1		W9A09YANA_IRR	YANA
835	WW19682	113053	2009	254	3	9	9	W9A09COLE	730	24	13	1	1	RFD	80849	2.9751	mg/g	Yanco Hurricane 20/10	NA	NA	80849	NA	1	1		W9A09COLE_RFD	COLE
836	65211_176	111491	2009	118	3	9	10	W9A09COLE	12	11	11	1	1	RFD	80850	2.533	mg/g	Lucerne Dehydrator 20/10	NA	NA	80850	NA	1	1		W9A09COLE_RFD	COLE
837	GASCOIGNE	112370	2009	562	3	9	11	W9A09COLE	71	18	50	1	2	IRR	80851	1.5159	mg/g	Leeton Hurricane 20/10	NA	NA	80851	NA	1	1		W9A09COLE_IRR	COLE
838	LPB0602	111023	2009	82	3	9	12	W9A09COLE	294	7	23	1	1	RFD	80852	1.4041	mg/g	Yanco Hurricane 20/10	NA	NA	80852	82397	1	2		W9A09COLE_RFD	COLE
839	VW1286	110628	2009	1124	3	9	13	W9A09COLE	453	3	108	2	4	RFD	80853	0.91495	mg/g	Lucerne Dehydrator 19/10	NA	NA	80853	NA	1	1		W9A09COLE_RFD	COLE
840	SUN525D	115114	2009	2607	3	9	14	W9A09YANA	354	7	106	2	4	IRR	80854	1.6463	mg/g	Hurricane Dehydrator 13/10/09	NA	NA	80854	NA	1	1		W9A09YANA_IRR	YANA
841	LPB04_2386_1302	113958	2009	1068	3	9	15	W9A09COLE	291	31	78	2	3	IRR	80855	2.1152	mg/g	Yanco Hurricane 19/10	NA	NA	80855	NA	1	1		W9A09COLE_IRR	COLE
842	WW21859	112927	2009	237	3	9	16	W9A09COLE	831	23	7	1	1	RFD	80856	1.742	mg/g	Yanco Hurricane 20/10	NA	NA	80856	NA	1	1		W9A09COLE_RFD	COLE
843	B1272T	112533	2009	1295	3	9	17	W9A09COLE	44	19	93	2	4	RFD	80857	1.8461	mg/g	Lucerne Dehydrator 19/10	NA	NA	80857	NA	1	1		W9A09COLE_RFD	COLE
844	WW20159	114502	2009	1493	3	9	18	W9A09YANA	756	3	6	1	1	IRR	80858	1.5091	mg/g	Lucerne Dehydrator 13/10/09	NA	NA	80858	82906	1	2		W9A09YANA_IRR	YANA
845	WW19410	114905	2009	1552	3	9	19	W9A09YANA	701	6	25	1	1	IRR	80859	1.4496	mg/g	Lucerne Dehydrator 5/10 - 13/10	NA	NA	80859	NA	1	1		W9A09YANA_IRR	YANA
846	HRZ06_0078	116593	2009	2051	3	9	20	W9A09YANA	219	19	49	1	2	RFD	80860	0.94445	mg/g	Lucerne Dehydrator 5/10 - 13/10	NA	NA	80860	NA	1	1		W9A09YANA_RFD	YANA
847	VW3744	113293	2009	276	3	9	21	W9A09COLE	510	26	13	1	1	RFD	80861	2.293	mg/g	Yanco Hurricane 20/10	NA	NA	80861	82977	1	2	hole in plot	W9A09COLE_RFD	COLE
848	WW19743	116141	2009	2691	3	9	22	W9A09YANA	735	15	109	2	4	IRR	80862	1.5477	mg/g	Hurricane Dehydrator 13/10/09	NA	NA	80862	NA	1	1		W9A09YANA_IRR	YANA
849	VW3397	115530	2009	1610	3	9	23	W9A09YANA	490	11	10	1	1	IRR	80863	1.1418	mg/g	Lucerne Dehydrator 5/10 - 13/10	NA	NA	80863	NA	1	1		W9A09YANA_IRR	YANA
850	HRZ06_0488	113547	2009	306	3	9	24	W9A09COLE	252	28	27	1	1	RFD	80864	2.2646	mg/g	Yanco Hurricane 20/10	NA	NA	80864	NA	1	1		W9A09COLE_RFD	COLE
851	VW0394	111585	2009	1208	3	9	25	W9A09COLE	427	11	105	2	4	RFD	80865	1.1239	mg/g	Lucerne Dehydrator 19/10	NA	NA	80865	81690	1	2		W9A09COLE_RFD	COLE
852	HRZ06_0067	110862	2009	1144	3	9	26	W9A09COLE	213	5	102	2	4	RFD	80866	1.9202	mg/g	Lucerne Dehydrator 19/10	NA	NA	80866	NA	1	1		W9A09COLE_RFD	COLE
853	QT13365	114911	2009	1554	3	9	27	W9A09YANA	314	6	31	1	1	IRR	80867	1.5231	mg/g	Lucerne Dehydrator 5/10 - 13/10	NA	NA	80867	NA	1	1		W9A09YANA_IRR	YANA
854	WW18946	113906	2009	338	3	9	28	W9A09COLE	687	31	26	1	1	RFD	80868	2.0253	mg/g	Yanco Hurricane 20/10	NA	NA	80868	81950	1	2		W9A09COLE_RFD	COLE
855	WW19826	116319	2009	1701	3	9	29	W9A09YANA	740	17	31	1	1	IRR	80869	1.6462	mg/g	Hurricane Dehydrator 13/10/09	NA	NA	80869	NA	1	1		W9A09YANA_IRR	YANA
856	WW20383	112880	2009	962	3	9	30	W9A09COLE	765	22	80	2	3	IRR	80870	1.3559	mg/g	Yanco Hurricane 19/10	NA	NA	80870	NA	1	1		W9A09COLE_IRR	COLE
857	WEEBILL1	114421	2009	1843	3	10	1	W9A09YANA	550	2	53	1	2	RFD	80871	1.5632	mg/g	Lucerne Dehydrator 5/10 - 13/10	NA	NA	80871	NA	1	1		W9A09YANA_RFD	YANA
858	CHARA	113208	2009	641	3	10	2	W9A09COLE	52	25	48	1	2	IRR	80872	1.5328	mg/g	Leeton Hurricane 20/10	NA	NA	80872	NA	1	1		W9A09COLE_IRR	COLE
859	YENDA	111664	2009	852	3	10	3	W9A09COLE	840	12	64	2	3	IRR	80873	0.97943	mg/g	Lucerne Dehydrator 19/10	NA	NA	80873	NA	1	1		W9A09COLE_IRR	COLE
860	WW14311	115404	2009	1598	3	10	4	W9A09YANA	581	10	12	1	1	IRR	80874	1.4298	mg/g	Lucerne Dehydrator 13/10/09	NA	NA	80874	82196	1	2		W9A09YANA_IRR	YANA
861	VW0241	113720	2009	1045	3	10	5	W9A09COLE	419	29	80	2	3	IRR	80875	1.9289	mg/g	Yanco Hurricane 19/10	NA	NA	80875	NA	1	1		W9A09COLE_IRR	COLE
862	VW0394	117829	2009	1798	3	10	6	W9A09YANA	427	29	5	1	1	IRR	80876	1.1323	mg/g	Lucerne Dehydrator 5/10 - 13/10	NA	NA	80876	NA	1	1		W9A09YANA_IRR	YANA
863	WW20159	116377	2009	2383	3	10	7	W9A09YANA	756	17	89	2	3	RFD	80877	0.51829	mg/g	Lucerne Dehydrator 5/10 - 13/10	NA	NA	80877	NA	1	1		W9A09YANA_RFD	YANA
864	HRZ06_0143	114394	2009	1487	3	10	8	W9A09YANA	222	2	26	1	1	IRR	80878	1.4216	mg/g	Lucerne Dehydrator 13/10/09	NA	NA	80878	NA	1	1		W9A09YANA_IRR	YANA
865	AUS33467	114625	2009	1510	3	10	9	W9A09YANA	28	4	1	1	1	IRR	80879	1.9191	mg/g	Lucerne Dehydrator 13/10/09	NA	NA	80879	82272	1	2		W9A09YANA_IRR	YANA
866	WW18827	112315	2009	1280	3	10	10	W9A09COLE	674	17	115	2	4	RFD	80880	1.4334	mg/g	Lucerne Dehydrator 19/10	NA	NA	80880	NA	1	1		W9A09COLE_RFD	COLE
867	WW14309	113916	2009	702	3	10	11	W9A09COLE	580	31	36	1	2	IRR	80881	2.1977	mg/g	Leeton Hurricane 20/10	NA	NA	80881	NA	1	1		W9A09COLE_IRR	COLE
868	VW3174	110282	2009	2	3	10	12	W9A09COLE	487	1	2	1	1	RFD	80882	1.3682	mg/g	Yanco Hurricane 20/10	NA	NA	80882	NA	1	1		W9A09COLE_RFD	COLE
869	VW2067	111261	2009	103	3	10	13	W9A09COLE	462	9	21	1	1	RFD	80883	2.0837	mg/g	Yanco Hurricane 20/10	NA	NA	80883	82065	1	2		W9A09COLE_RFD	COLE
870	IRENA/BABAX//PASTOR	111429	2009	832	3	10	14	W9A09COLE	277	10	69	2	3	IRR	80884	2.4642	mg/g	Lucerne Dehydrator 19/10	NA	NA	80884	NA	1	1		W9A09COLE_IRR	COLE
871	VV4963_2	115934	2009	1666	3	10	15	W9A09YANA	415	14	30	1	1	IRR	80885	1.4028	mg/g	Lucerne Dehydrator 5/10 - 13/10	NA	NA	80885	NA	1	1		W9A09YANA_IRR	YANA
872	HRZ04_0191	117349	2009	2111	3	10	16	W9A09YANA	122	25	37	1	2	RFD	80886	1.3073	mg/g	Lucerne Dehydrator 5/10 - 13/10	NA	NA	80886	NA	1	1		W9A09YANA_RFD	YANA
873	HRZ06_0514	117152	2009	2454	3	10	17	W9A09YANA	257	23	96	2	3	RFD	80887	0.88413	mg/g	Lucerne Dehydrator 5/10 - 13/10	NA	NA	80887	81356	1	2		W9A09YANA_RFD	YANA
874	WW21843	113558	2009	672	3	10	18	W9A09COLE	830	28	38	1	2	IRR	80888	2.4962	mg/g	Leeton Hurricane 20/10	NA	NA	80888	NA	1	1		W9A09COLE_IRR	COLE
875	VW0395	115979	2009	2341	3	10	20	W9A09YANA	428	14	75	2	3	RFD	80890	0.9865	mg/g	Lucerne Dehydrator then Leeton Farm 13/10/09	NA	NA	80890	NA	1	1		W9A09YANA_RFD	YANA
876	HRZ04_0354	115462	2009	2291	3	10	21	W9A09YANA	142	10	70	2	3	RFD	80891	1.2615	mg/g	Lucerne Dehydrator 5/10 - 13/10	NA	NA	80891	NA	1	1		W9A09YANA_RFD	YANA
877	DIAMONDBIRD	112672	2009	1317	3	10	22	W9A09COLE	58	20	112	2	4	RFD	80892	1.2079	mg/g	Lucerne Dehydrator 19/10	NA	NA	80892	NA	1	1		W9A09COLE_RFD	COLE
878	MERINDA	116171	2009	1685	3	10	23	W9A09YANA	297	16	11	1	1	IRR	80893	1.1179	mg/g	Lucerne Dehydrator 13/10/09	NA	NA	80893	NA	1	1		W9A09YANA_IRR	YANA
879	HRZ04_0157	112314	2009	1279	3	10	24	W9A09COLE	118	17	114	2	4	RFD	80894	1.7164	mg/g	Lucerne Dehydrator 19/10	NA	NA	80894	81928	1	2		W9A09COLE_RFD	COLE
880	VW2067	117574	2009	1779	3	10	25	W9A09YANA	462	27	6	1	1	IRR	80895	1.3845	mg/g	Lucerne Dehydrator then Leeton Farm 13/10/09	NA	NA	80895	NA	1	1		W9A09YANA_IRR	YANA
881	HRZ05_0085	116376	2009	2382	3	10	26	W9A09YANA	160	17	88	2	3	RFD	80896	1.0456	mg/g	Lucerne Dehydrator 5/10 - 13/10	NA	NA	80896	NA	1	1		W9A09YANA_RFD	YANA
882	WW19632	111248	2009	99	3	10	27	W9A09COLE	719	9	8	1	1	RFD	80897	2.4648	mg/g	Lucerne Dehydrator 20/10	NA	NA	80897	NA	1	1		W9A09COLE_RFD	COLE
883	VW3717	114538	2009	1854	3	10	28	W9A09YANA	509	3	42	1	2	RFD	80898	0.80505	mg/g	Hurricane Dehydrator 13/10/09	NA	NA	80898	NA	1	1		W9A09YANA_RFD	YANA
884	WW18827	110823	2009	774	3	10	29	W9A09COLE	674	5	63	2	3	IRR	80899	1.3712	mg/g	Lucerne Dehydrator 19/10	NA	NA	80899	NA	1	1		W9A09COLE_IRR	COLE
885	VW0398	110670	2009	51	3	10	30	W9A09COLE	429	4	30	1	1	RFD	80900	2.0229	mg/g	Yanco Hurricane 20/10	NA	NA	80900	81996	1	2		W9A09COLE_RFD	COLE
886	VV3277	116844	2009	2067	4	1	1	W9A09YANA	412	21	44	1	2	RFD	80901	1.0529	mg/g	Lucerne Dehydrator then Leeton Farm 13/10/09	NA	NA	80901	NA	1	1		W9A09YANA_RFD	YANA
887	WW18791	114047	2009	714	4	1	2	W9A09COLE	671	32	47	1	2	IRR	80902	1.3273	mg/g	Leeton Hurricane 20/10	NA	NA	80902	82361	1	2		W9A09COLE_IRR	COLE
888	114892_109	113612	2009	1389	4	1	3	W9A09COLE	2	28	92	2	4	RFD	80903	2.2357	mg/g	Lucerne Dehydrator 19/10	NA	NA	80903	NA	1	1		W9A09COLE_RFD	COLE
889	SUNVALE	113624	2009	1392	4	1	4	W9A09COLE	373	28	104	2	4	RFD	80904	1.967	mg/g	Lucerne Dehydrator 19/10	NA	NA	80904	NA	1	1		W9A09COLE_RFD	COLE
890	SUN559A	117567	2009	2855	4	1	5	W9A09YANA	364	26	127	2	4	IRR	80905	1.6333	mg/g	Hurricane Dehydrator 13/10/09	NA	NA	80905	NA	1	1		W9A09YANA_IRR	YANA
891	HRZ06_0299	114451	2009	2204	4	1	6	W9A09YANA	244	2	83	2	3	RFD	80906	1.2634	mg/g	Lucerne Dehydrator 5/10 - 13/10	NA	NA	80906	NA	1	1		W9A09YANA_RFD	YANA
892	HRZ06_0043	117175	2009	2812	4	1	7	W9A09YANA	200	23	119	2	4	IRR	80907	1.771	mg/g	Hurricane Dehydrator 13/10/09	NA	NA	80907	82130	1	2		W9A09YANA_IRR	YANA
893	VV2321	114527	2009	1508	4	1	8	W9A09YANA	406	3	31	1	1	IRR	80908	1.0886	mg/g	Lucerne Dehydrator 13/10/09	NA	NA	80908	NA	1	1		W9A09YANA_IRR	YANA
894	HRZ04_0420	114188	2009	1085	4	1	9	W9A09COLE	146	33	68	2	3	IRR	80909	2.3748	mg/g	Yanco Hurricane 19/10	NA	NA	80909	NA	1	1		W9A09COLE_IRR	COLE
895	VW0395	112162	2009	905	4	1	11	W9A09COLE	428	16	82	2	3	IRR	80911	1.0497	mg/g	Lucerne Dehydrator 19/10	NA	NA	80911	81749	1	2		W9A09COLE_IRR	COLE
896	HRZ04_0111	113380	2009	1370	4	1	12	W9A09COLE	107	26	100	2	4	RFD	80912	1.9926	mg/g	Lucerne Dehydrator 19/10	NA	NA	80912	NA	1	1		W9A09COLE_RFD	COLE
897	VU3750	114675	2009	1871	4	1	13	W9A09YANA	393	4	51	1	2	RFD	80913	1.0084	mg/g	Lucerne Dehydrator 5/10 - 13/10	NA	NA	80913	NA	1	1		W9A09YANA_RFD	YANA
898	HRZ04_0425	112388	2009	920	4	1	14	W9A09COLE	148	18	68	2	3	IRR	80914	1.8899	mg/g	Yanco Hurricane 19/10	NA	NA	80914	NA	1	1		W9A09COLE_IRR	COLE
899	HRZ04_0321	113385	2009	1372	4	1	15	W9A09COLE	137	26	105	2	4	RFD	80915	1.7461	mg/g	Lucerne Dehydrator 19/10	NA	NA	80915	82325	1	2		W9A09COLE_RFD	COLE
900	HRZ03_0005	116911	2009	2780	4	1	16	W9A09YANA	88	21	111	2	4	IRR	80916	1.787	mg/g	Hurricane Dehydrator 13/10/09	NA	NA	80916	NA	1	1		W9A09YANA_IRR	YANA
901	WW17062	117203	2009	1758	4	1	17	W9A09YANA	612	24	19	1	1	IRR	80917	1.2134	mg/g	Lucerne Dehydrator 5/10 - 13/10	NA	NA	80917	NA	1	1		W9A09YANA_IRR	YANA
902	WW20469	113236	2009	994	4	1	18	W9A09COLE	768	25	76	2	3	IRR	80918	1.2245	mg/g	Yanco Hurricane 19/10	NA	NA	80918	NA	1	1		W9A09COLE_IRR	COLE
903	IRENA/BABAX//PASTOR	113570	2009	679	4	1	19	W9A09COLE	277	28	50	1	2	IRR	80919	2.1559	mg/g	Leeton Hurricane 20/10	NA	NA	80919	NA	1	1		W9A09COLE_IRR	COLE
904	HRZ04_0425	117975	2009	1819	4	1	20	W9A09YANA	148	30	23	1	1	IRR	80920	1.4106	mg/g	Lucerne Dehydrator 5/10 - 13/10	NA	NA	80920	82024	1	2		W9A09YANA_IRR	YANA
905	HRZ06_0065	113991	2009	1435	4	1	21	W9A09COLE	211	31	111	2	4	RFD	80921	2.4265	mg/g	Lucerne Dehydrator 19/10	NA	NA	80921	NA	1	1		W9A09COLE_RFD	COLE
906	WW19147	112854	2009	610	4	1	22	W9A09COLE	695	22	54	1	2	IRR	80922	2.5949	mg/g	Leeton Hurricane 20/10	NA	NA	80922	NA	1	1		W9A09COLE_IRR	COLE
907	PAVON_DWARF	110572	2009	394	4	1	24	W9A09COLE	301	3	52	1	2	IRR	80924	1.3986	mg/g	Leeton Hurricane 20/10	NA	NA	80924	NA	1	1		W9A09COLE_IRR	COLE
908	GLADIUS	110778	2009	61	4	1	25	W9A09COLE	77	5	18	1	1	RFD	80925	1.8304	mg/g	Lucerne Dehydrator 20/10	NA	NA	80925	NA	1	1		W9A09COLE_RFD	COLE
909	VW3397	111692	2009	1214	4	1	26	W9A09COLE	490	12	92	2	4	RFD	80926	1.9188	mg/g	Lucerne Dehydrator 19/10	NA	NA	80926	NA	1	1		W9A09COLE_RFD	COLE
910	WW19514	112261	2009	908	4	1	27	W9A09COLE	708	17	61	2	3	IRR	80927	1.45	mg/g	Lucerne Dehydrator 19/10	NA	NA	80927	81729	1	2		W9A09COLE_IRR	COLE
911	VT1022	110938	2009	423	4	1	28	W9A09COLE	383	6	58	1	2	IRR	80928	2.01	mg/g	Leeton Hurricane 20/10	NA	NA	80928	NA	1	1		W9A09COLE_IRR	COLE
912	VW1174	110867	2009	1146	4	1	29	W9A09COLE	445	5	107	2	4	RFD	80929	1.2614	mg/g	Lucerne Dehydrator 19/10	NA	NA	80929	NA	1	1		W9A09COLE_RFD	COLE
913	VW3463	116980	2009	2081	4	1	30	W9A09YANA	497	22	52	1	2	RFD	80930	1.3795	mg/g	Lucerne Dehydrator then Leeton Farm 13/10/09	NA	NA	80930	NA	1	1		W9A09YANA_RFD	YANA
914	RAC1418	111683	2009	862	4	2	1	W9A09COLE	330	12	83	2	3	IRR	80931	1.1363	mg/g	Lucerne Dehydrator 19/10	NA	NA	80931	NA	1	1		W9A09COLE_IRR	COLE
915	VW3405	116845	2009	2068	4	2	2	W9A09YANA	494	21	45	1	2	RFD	80932	0.65275	mg/g	Lucerne Dehydrator 5/10 - 13/10	NA	NA	80932	NA	1	1		W9A09YANA_RFD	YANA
916	HRZ05_0145	113042	2009	246	4	2	3	W9A09COLE	177	24	2	1	1	RFD	80933	2.0681	mg/g	Yanco Hurricane 20/10	NA	NA	80933	NA	1	1		W9A09COLE_RFD	COLE
917	HRZ06_0488	111997	2009	527	4	2	4	W9A09COLE	252	15	37	1	2	IRR	80934	1.8288	mg/g	Leeton Hurricane 20/10	NA	NA	80934	NA	1	1		W9A09COLE_IRR	COLE
918	CHARA	111795	2009	870	4	2	5	W9A09COLE	52	13	75	2	3	IRR	80935	1.8269	mg/g	Lucerne Dehydrator 19/10	NA	NA	80935	81893	1	2		W9A09COLE_IRR	COLE
919	HRZ05_0245	116280	2009	2710	4	2	6	W9A09YANA	188	16	120	2	4	IRR	80936	1.5962	mg/g	Hurricane Dehydrator 13/10/09	NA	NA	80936	NA	1	1		W9A09YANA_IRR	YANA
920	ROSELLA	117469	2009	1775	4	2	7	W9A09YANA	346	26	29	1	1	IRR	80937	0.29508	mg/g	Hurricane Dehydrator 13/10/09	NA	NA	80937	NA	1	1		W9A09YANA_IRR	YANA
921	VW3789	117649	2009	2497	4	2	8	W9A09YANA	512	27	81	2	3	RFD	80938	1.1745	mg/g	Lucerne Dehydrator 5/10 - 13/10	NA	NA	80938	NA	1	1		W9A09YANA_RFD	YANA
922	VW0823	110992	2009	1162	4	2	9	W9A09COLE	439	6	112	2	4	RFD	80939	1.5078	mg/g	Lucerne Dehydrator 19/10	NA	NA	80939	NA	1	1		W9A09COLE_RFD	COLE
923	WW16259	116542	2009	2741	4	2	10	W9A09YANA	603	18	126	2	4	IRR	80940	1.0364	mg/g	Hurricane Dehydrator 13/10/09	NA	NA	80940	81820	1	2		W9A09YANA_IRR	YANA
924	HRZ04_0420	116855	2009	2072	4	2	11	W9A09YANA	146	21	55	1	2	RFD	80941	1.4828	mg/g	Lucerne Dehydrator 5/10 - 13/10	NA	NA	80941	NA	1	1		W9A09YANA_RFD	YANA
925	AXE	114619	2009	2581	4	2	12	W9A09YANA	40	3	123	2	4	IRR	80942	1.5453	mg/g	Hurricane Dehydrator 13/10/09	NA	NA	80942	NA	1	1		W9A09YANA_IRR	YANA
926	WW13773	112777	2009	1323	4	2	13	W9A09COLE	570	21	97	2	4	RFD	80943	1.5567	mg/g	Lucerne Dehydrator 19/10	NA	NA	80943	NA	1	1		W9A09COLE_RFD	COLE
927	WW19864	115798	2009	1651	4	2	14	W9A09YANA	741	13	22	1	1	IRR	80944	1.5201	mg/g	Lucerne Dehydrator 5/10 - 13/10	NA	NA	80944	82779	1	2		W9A09YANA_IRR	YANA
928	WW14311	116788	2009	2765	4	2	15	W9A09YANA	581	20	116	2	4	IRR	80945	2.0973	mg/g	Hurricane Dehydrator 13/10/09	NA	NA	80945	NA	1	1		W9A09YANA_IRR	YANA
929	HRZ06_0043	114812	2009	1889	4	2	16	W9A09YANA	200	5	60	1	2	RFD	80946	1.4499	mg/g	Lucerne Dehydrator 5/10 - 13/10	NA	NA	80946	NA	1	1		W9A09YANA_RFD	YANA
930	VW3744	116576	2009	1721	4	2	17	W9A09YANA	510	19	32	1	1	IRR	80947	1.0421	mg/g	Lucerne Dehydrator 5/10 - 13/10	NA	NA	80947	NA	1	1		W9A09YANA_IRR	YANA
931	QT12667	116867	2009	2424	4	2	18	W9A09YANA	303	21	67	2	3	RFD	80948	0.94457	mg/g	Lucerne Dehydrator then Leeton Farm 13/10/09	NA	NA	80948	NA	1	1		W9A09YANA_RFD	YANA
932	CRUSADER	112746	2009	951	4	2	19	W9A09COLE	54	21	66	2	3	IRR	80949	1.6517	mg/g	Yanco Hurricane 19/10	NA	NA	80949	82657	1	2		W9A09COLE_IRR	COLE
933	SUN571B	110541	2009	31	4	2	20	W9A09COLE	369	3	21	1	1	RFD	80950	0.82979	mg/g	Yanco Hurricane 20/10	NA	NA	80950	NA	1	1		W9A09COLE_RFD	COLE
934	VW3707	110434	2009	380	4	2	21	W9A09COLE	505	2	34	1	2	IRR	80951	1.2796	mg/g	Leeton Hurricane 20/10	NA	NA	80951	NA	1	1		W9A09COLE_IRR	COLE
935	WW14314	118070	2009	2905	4	2	22	W9A09YANA	582	30	118	2	4	IRR	80952	1.3521	mg/g	Hurricane Dehydrator 13/10/09	NA	NA	80952	NA	1	1		W9A09YANA_IRR	YANA
936	GLADIUS	115771	2009	2667	4	2	24	W9A09YANA	77	12	123	2	4	IRR	80954	1.428	mg/g	Hurricane Dehydrator 13/10/09	NA	NA	80954	NA	1	1		W9A09YANA_IRR	YANA
937	LPB04_2172	117787	2009	2513	4	2	25	W9A09YANA	283	28	91	2	3	RFD	80955	1.9044	mg/g	Lucerne Dehydrator then Leeton Farm 13/10/09	NA	NA	80955	NA	1	1		W9A09YANA_RFD	YANA
938	WW19561	111113	2009	1173	4	2	26	W9A09COLE	711	7	113	2	4	RFD	80956	0.88713	mg/g	Lucerne Dehydrator 19/10	NA	NA	80956	82221	1	2		W9A09COLE_RFD	COLE
939	CATALINA	112828	2009	231	4	2	27	W9A09COLE	51	22	28	1	1	RFD	80957	2.4351	mg/g	Yanco Hurricane 20/10	NA	NA	80957	NA	1	1		W9A09COLE_RFD	COLE
940	HRZ06_0250	118174	2009	2554	4	2	28	W9A09YANA	232	31	94	2	3	RFD	80958	0.66489	mg/g	Lucerne Dehydrator 5/10 - 13/10	NA	NA	80958	NA	1	1		W9A09YANA_RFD	YANA
941	ZEBU	115802	2009	1654	4	2	29	W9A09YANA	841	13	26	1	1	IRR	80959	1.8955	mg/g	Lucerne Dehydrator 5/10 - 13/10	NA	NA	80959	NA	1	1		W9A09YANA_IRR	YANA
942	WW9696	117955	2009	1811	4	2	30	W9A09YANA	837	30	3	1	1	IRR	80960	1.5431	mg/g	Lucerne Dehydrator 5/10 - 13/10	NA	NA	80960	NA	1	1		W9A09YANA_IRR	YANA
943	RAC1442	110946	2009	786	4	3	1	W9A09COLE	333	6	66	2	3	IRR	80961	1.2129	mg/g	Lucerne Dehydrator 19/10	NA	NA	80961	82885	1	2		W9A09COLE_IRR	COLE
944	HRZ06_0033	116985	2009	2085	4	3	2	W9A09YANA	192	22	57	1	2	RFD	80962	1.0319	mg/g	Lucerne Dehydrator 5/10 - 13/10	NA	NA	80962	NA	1	1		W9A09YANA_RFD	YANA
945	VW3744	113677	2009	687	4	3	3	W9A09COLE	510	29	37	1	2	IRR	80963	2.3092	mg/g	Leeton Hurricane 20/10	NA	NA	80963	NA	1	1		W9A09COLE_IRR	COLE
946	WW19147	116873	2009	2425	4	3	4	W9A09YANA	695	21	73	2	3	RFD	80964	1.096	mg/g	Lucerne Dehydrator 5/10 - 13/10	NA	NA	80964	NA	1	1		W9A09YANA_RFD	YANA
947	VW3744	112177	2009	1262	4	3	5	W9A09COLE	510	16	97	2	4	RFD	80965	1.3124	mg/g	Lucerne Dehydrator 19/10	NA	NA	80965	NA	1	1		W9A09COLE_RFD	COLE
948	VW2410	110822	2009	773	4	3	6	W9A09COLE	475	5	62	2	3	IRR	80966	0.79907	mg/g	Lucerne Dehydrator 19/10	NA	NA	80966	NA	1	1		W9A09COLE_IRR	COLE
949	HRZ06_2082	116766	2009	2422	4	3	7	W9A09YANA	265	20	94	2	3	RFD	80967	0.71746	mg/g	Lucerne Dehydrator 5/10 - 13/10	NA	NA	80967	NA	1	1		W9A09YANA_RFD	YANA
950	VW0720	117002	2009	2434	4	3	8	W9A09YANA	434	22	74	2	3	RFD	80968	1.4179	mg/g	Lucerne Dehydrator 5/10 - 13/10	NA	NA	80968	NA	1	1		W9A09YANA_RFD	YANA
951	WW19754	117859	2009	2157	4	3	9	W9A09YANA	739	29	35	1	2	RFD	80969	1.4317	mg/g	Lucerne Dehydrator 5/10 - 13/10	NA	NA	80969	81879	1	2		W9A09YANA_RFD	YANA
952	QT12667	111537	2009	487	4	3	10	W9A09COLE	303	11	57	1	2	IRR	80970	1.3784	mg/g	Leeton Hurricane 20/10	NA	NA	80970	NA	1	1		W9A09COLE_IRR	COLE
953	MERINDA	110603	2009	757	4	3	11	W9A09COLE	297	3	83	2	3	IRR	80971	1.3146	mg/g	Lucerne Dehydrator 19/10	NA	NA	80971	NA	1	1		W9A09COLE_IRR	COLE
954	VW0222	116900	2009	2773	4	3	12	W9A09YANA	418	21	100	2	4	IRR	80972	1.5418	mg/g	Hurricane Dehydrator 13/10/09	NA	NA	80972	NA	1	1		W9A09YANA_IRR	YANA
955	YENDA	114556	2009	1862	4	3	13	W9A09YANA	840	3	60	1	2	RFD	80973	1.3388	mg/g	Lucerne Dehydrator 5/10 - 13/10	NA	NA	80973	NA	1	1		W9A09YANA_RFD	YANA
956	WW19525	111780	2009	513	4	3	14	W9A09COLE	709	13	60	1	2	IRR	80974	1.8198	mg/g	Leeton Hurricane 20/10	NA	NA	80974	NA	1	1		W9A09COLE_IRR	COLE
957	SUNBRI	117389	2009	2471	4	3	15	W9A09YANA	372	25	77	2	3	RFD	80975	1.7723	mg/g	Lucerne Dehydrator then Leeton Farm 13/10/09	NA	NA	80975	NA	1	1		W9A09YANA_RFD	YANA
958	HRZ05_0101	115408	2009	1601	4	3	16	W9A09YANA	161	10	16	1	1	IRR	80976	1.4672	mg/g	Lucerne Dehydrator 5/10 - 13/10	NA	NA	80976	82555	1	2	clear	W9A09YANA_IRR	YANA
959	VW0644	117755	2009	2155	4	3	17	W9A09YANA	433	28	59	1	2	RFD	80977	1.3358	mg/g	Lucerne Dehydrator then Leeton Farm 13/10/09	NA	NA	80977	NA	1	1		W9A09YANA_RFD	YANA
960	WW19733	114360	2009	2564	4	3	18	W9A09YANA	734	1	120	2	4	IRR	80978	1.3091	mg/g	Hurricane Dehydrator 13/10/09	NA	NA	80978	NA	1	1		W9A09YANA_IRR	YANA
961	SUN570D	113946	2009	1065	4	3	19	W9A09COLE	368	31	66	2	3	IRR	80979	2.4602	mg/g	Yanco Hurricane 19/10	NA	NA	80979	NA	1	1		W9A09COLE_IRR	COLE
962	WW20469	115616	2009	2310	4	3	20	W9A09YANA	768	11	96	2	3	RFD	80980	0.99624	mg/g	Lucerne Dehydrator 5/10 - 13/10	NA	NA	80980	NA	1	1		W9A09YANA_RFD	YANA
963	WW19665	113894	2009	334	4	3	21	W9A09COLE	728	31	14	1	1	RFD	80981	1.6662	mg/g	Yanco Hurricane 20/10	NA	NA	80981	NA	1	1		W9A09COLE_RFD	COLE
964	VW0222	113766	2009	317	4	3	22	W9A09COLE	418	30	6	1	1	RFD	80982	2.3045	mg/g	Yanco Hurricane 20/10	NA	NA	80982	83098	1	2		W9A09COLE_RFD	COLE
965	VW1152	113099	2009	633	4	3	23	W9A09COLE	444	24	59	1	2	IRR	80983	1.5524	mg/g	Leeton Hurricane 20/10	NA	NA	80983	NA	1	1		W9A09COLE_IRR	COLE
966	PAVON_DWARF	111729	2009	138	4	3	24	W9A09COLE	301	13	9	1	1	RFD	80984	1.8609	mg/g	Lucerne Dehydrator 20/10	NA	NA	80984	NA	1	1		W9A09COLE_RFD	COLE
967	AUS33466	112858	2009	614	4	3	25	W9A09COLE	27	22	58	1	2	IRR	80985	2.5057	mg/g	Leeton Hurricane 20/10	NA	NA	80985	82448	1	2		W9A09COLE_IRR	COLE
968	LPB04_2386_1302	115573	2009	1967	4	3	26	W9A09YANA	291	11	53	1	2	RFD	80986	1.8934	mg/g	Lucerne Dehydrator then Leeton Farm 13/10/09	NA	NA	80986	NA	1	1		W9A09YANA_RFD	YANA
969	WAGT019	114518	2009	1503	4	3	27	W9A09YANA	523	3	22	1	1	IRR	80987	1.8557	mg/g	Lucerne Dehydrator 5/10 - 13/10	NA	NA	80987	NA	1	1		W9A09YANA_IRR	YANA
970	HRZ04_0157	115768	2009	2666	4	3	28	W9A09YANA	118	12	120	2	4	IRR	80988	1.9034	mg/g	Hurricane Dehydrator 13/10/09	NA	NA	80988	NA	1	1		W9A09YANA_IRR	YANA
971	VW0379	114655	2009	1526	4	3	29	W9A09YANA	425	4	31	1	1	IRR	80989	1.3408	mg/g	Lucerne Dehydrator 13/10/09	NA	NA	80989	83017	1	2		W9A09YANA_IRR	YANA
972	WW21843	117838	2009	1803	4	3	30	W9A09YANA	830	29	14	1	1	IRR	80990	1.4188	mg/g	Lucerne Dehydrator 5/10 - 13/10	NA	NA	80990	NA	1	1		W9A09YANA_IRR	YANA
973	HRZ04_0188	115165	2009	1581	4	4	1	W9A09YANA	121	8	29	1	1	IRR	80991	1.3209	mg/g	Lucerne Dehydrator 5/10 - 13/10	NA	NA	80991	NA	1	1		W9A09YANA_IRR	YANA
974	QT13626	113322	2009	651	4	4	2	W9A09COLE	320	26	42	1	2	IRR	80992	1.4384	mg/g	Leeton Hurricane 20/10	NA	NA	80992	NA	1	1		W9A09COLE_IRR	COLE
975	VV2856	114278	2009	1828	4	4	3	W9A09YANA	409	1	38	1	2	RFD	80993	0.88717	mg/g	Lucerne Dehydrator 5/10 - 13/10	NA	NA	80993	82522	1	2		W9A09YANA_RFD	YANA
976	WW19492	110317	2009	369	4	4	4	W9A09COLE	705	1	37	1	2	IRR	80994	1.2464	mg/g	Leeton Hurricane 20/10	NA	NA	80994	NA	1	1		W9A09COLE_IRR	COLE
977	WW20140	117744	2009	2149	4	4	5	W9A09YANA	755	28	48	1	2	RFD	80995	1.0729	mg/g	Lucerne Dehydrator 5/10 - 13/10	NA	NA	80995	NA	1	1		W9A09YANA_RFD	YANA
978	GUARDIAN	112247	2009	552	4	4	6	W9A09COLE	78	17	47	1	2	IRR	80996	1.5264	mg/g	Leeton Hurricane 20/10	NA	NA	80996	83099	1	2		W9A09COLE_IRR	COLE
979	VW1194	112870	2009	956	4	4	7	W9A09COLE	450	22	70	2	3	IRR	80997	2.0037	mg/g	Yanco Hurricane 19/10	NA	NA	80997	NA	1	1		W9A09COLE_IRR	COLE
980	HRZ06_2070	114999	2009	2604	4	4	8	W9A09YANA	261	6	119	2	4	IRR	80998	1.3567	mg/g	Hurricane Dehydrator 13/10/09	NA	NA	80998	82105	1	2		W9A09YANA_IRR	YANA
981	TAMMARIN_ROCK	111778	2009	512	4	4	9	W9A09COLE	375	13	58	1	2	IRR	80999	1.5768	mg/g	Leeton Hurricane 20/10	NA	NA	80999	NA	1	1		W9A09COLE_IRR	COLE
982	WW20068	115160	2009	1580	4	4	10	W9A09YANA	753	8	24	1	1	IRR	81000	1.5692	mg/g	Lucerne Dehydrator 5/10 - 13/10	NA	NA	81000	NA	1	1		W9A09YANA_IRR	YANA
983	HRZ06_0065	116389	2009	2716	4	4	11	W9A09YANA	211	17	101	2	4	IRR	81001	1.6063	mg/g	Hurricane Dehydrator 13/10/09	NA	NA	81001	NA	1	1		W9A09YANA_IRR	YANA
984	LPB04_2264	117375	2009	2118	4	4	12	W9A09YANA	285	25	63	1	2	RFD	81002	1.4892	mg/g	Lucerne Dehydrator 5/10 - 13/10	NA	NA	81002	82184	1	2		W9A09YANA_RFD	YANA
985	VW3170	111541	2009	844	4	4	13	W9A09COLE	486	11	61	2	3	IRR	81003	0.9211	mg/g	Lucerne Dehydrator 19/10	NA	NA	81003	NA	1	1		W9A09COLE_IRR	COLE
986	WW19743	117828	2009	1797	4	4	14	W9A09YANA	735	29	4	1	1	IRR	81004	1.7235	mg/g	Lucerne Dehydrator 5/10 - 13/10	NA	NA	81004	NA	1	1		W9A09YANA_IRR	YANA
987	SUN525D	110981	2009	1157	4	4	15	W9A09COLE	354	6	101	2	4	RFD	81005	1.8588	mg/g	Lucerne Dehydrator 19/10	NA	NA	81005	NA	1	1		W9A09COLE_RFD	COLE
988	VW0385	113572	2009	680	4	4	16	W9A09COLE	426	28	52	1	2	IRR	81006	0.94931	mg/g	Leeton Hurricane 20/10	NA	NA	81006	NA	1	1		W9A09COLE_IRR	COLE
989	VV2401	117435	2009	2836	4	4	17	W9A09YANA	407	25	123	2	4	IRR	81007	1.1344	mg/g	Hurricane Dehydrator 13/10/09	NA	NA	81007	82924	1	2		W9A09YANA_IRR	YANA
990	CHARA	115323	2009	1945	4	4	18	W9A09YANA	52	9	59	1	2	RFD	81008	1.8813	mg/g	Lucerne Dehydrator 5/10 - 13/10	NA	NA	81008	NA	1	1		W9A09YANA_RFD	YANA
991	VW3404	117629	2009	2144	4	4	19	W9A09YANA	493	27	61	1	2	RFD	81009	1.4236	mg/g	Lucerne Dehydrator 5/10 - 13/10	NA	NA	81009	NA	1	1		W9A09YANA_RFD	YANA
992	WW21842	112783	2009	1327	4	4	20	W9A09COLE	829	21	103	2	4	RFD	81010	1.3702	mg/g	Lucerne Dehydrator 19/10	NA	NA	81010	NA	1	1		W9A09COLE_RFD	COLE
993	HRZ04_0188	114944	2009	1905	4	4	21	W9A09YANA	121	6	64	1	2	RFD	81011	1.5514	mg/g	Lucerne Dehydrator 5/10 - 13/10	NA	NA	81011	82793	1	2		W9A09YANA_RFD	YANA
994	VW2426	110766	2009	55	4	4	22	W9A09COLE	476	5	6	1	1	RFD	81012	1.7877	mg/g	Yanco Hurricane 20/10	NA	NA	81012	NA	1	1		W9A09COLE_RFD	COLE
995	VW1256	110542	2009	32	4	4	23	W9A09COLE	451	3	22	1	1	RFD	81013	1.5623	mg/g	Yanco Hurricane 20/10	NA	NA	81013	NA	1	1		W9A09COLE_RFD	COLE
996	WW20527	113582	2009	1025	4	4	25	W9A09COLE	772	28	62	2	3	IRR	81015	1.8724	mg/g	Yanco Hurricane 19/10	NA	NA	81015	NA	1	1		W9A09COLE_IRR	COLE
997	WW14072	110627	2009	1123	4	4	26	W9A09COLE	572	3	107	2	4	RFD	81016	1.2923	mg/g	Lucerne Dehydrator 19/10	NA	NA	81016	NA	1	1		W9A09COLE_RFD	COLE
998	JANZ	111784	2009	867	4	4	27	W9A09COLE	278	13	64	2	3	IRR	81017	1.4738	mg/g	Lucerne Dehydrator 19/10	NA	NA	81017	82709	1	2		W9A09COLE_IRR	COLE
999	WW19987	118153	2009	2548	4	4	28	W9A09YANA	752	31	73	2	3	RFD	81018	1.3277	mg/g	Lucerne Dehydrator 5/10 - 13/10	NA	NA	81018	NA	1	1		W9A09YANA_RFD	YANA
1000	WAGT022	113375	2009	1367	4	4	29	W9A09COLE	525	26	95	2	4	RFD	81019	1.9078	mg/g	Lucerne Dehydrator 19/10	NA	NA	81019	NA	1	1		W9A09COLE_RFD	COLE
1001	WW20140	113756	2009	1414	4	4	30	W9A09COLE	755	29	116	2	4	RFD	81020	1.7525	mg/g	Lucerne Dehydrator 19/10	NA	NA	81020	NA	1	1		W9A09COLE_RFD	COLE
1002	HRZ04_0513	112669	2009	1315	4	5	1	W9A09COLE	152	20	109	2	4	RFD	81021	1.3292	mg/g	Lucerne Dehydrator 19/10	NA	NA	81021	NA	1	1		W9A09COLE_RFD	COLE
1003	HRZ04_0425	112779	2009	1325	4	5	3	W9A09COLE	148	21	99	2	4	RFD	81023	1.9144	mg/g	Lucerne Dehydrator 19/10	NA	NA	81023	NA	1	1		W9A09COLE_RFD	COLE
1004	LPB04_2386_1302	111395	2009	466	4	5	4	W9A09COLE	291	10	35	1	2	IRR	81024	2.1155	mg/g	Leeton Hurricane 20/10	NA	NA	81024	81876	1	2		W9A09COLE_IRR	COLE
1005	WW13735	111861	2009	155	4	5	5	W9A09COLE	568	14	21	1	1	RFD	81025	2.5811	mg/g	Lucerne Dehydrator 20/10	NA	NA	81025	NA	1	1		W9A09COLE_RFD	COLE
1006	VW1498	112784	2009	1328	4	5	6	W9A09COLE	455	21	104	2	4	RFD	81026	1.1227	mg/g	Lucerne Dehydrator 19/10	NA	NA	81026	NA	1	1		W9A09COLE_RFD	COLE
1007	HRZ05_0159	117223	2009	2099	4	5	7	W9A09YANA	182	24	39	1	2	RFD	81027	1.3967	mg/g	Lucerne Dehydrator 5/10 - 13/10	NA	NA	81027	NA	1	1		W9A09YANA_RFD	YANA
1008	WW20484	118199	2009	2918	4	5	8	W9A09YANA	769	31	119	2	4	IRR	81028	1.5317	mg/g	Hurricane Dehydrator 13/10/09	NA	NA	81028	NA	1	1		W9A09YANA_IRR	YANA
1009	VW3789	117169	2009	2809	4	5	9	W9A09YANA	512	23	113	2	4	IRR	81029	1.7853	mg/g	Hurricane Dehydrator 13/10/09	NA	NA	81029	NA	1	1		W9A09YANA_IRR	YANA
1010	WW20672	111529	2009	482	4	5	10	W9A09COLE	788	11	49	1	2	IRR	81030	1.8422	mg/g	Leeton Hurricane 20/10	NA	NA	81030	82703	1	2		W9A09COLE_IRR	COLE
1011	VW3717	116503	2009	2394	4	5	11	W9A09YANA	509	18	87	2	3	RFD	81031	0.83872	mg/g	Lucerne Dehydrator 5/10 - 13/10	NA	NA	81031	NA	1	1		W9A09YANA_RFD	YANA
1012	VW4056	112101	2009	175	4	5	12	W9A09COLE	514	16	21	1	1	RFD	81032	2.0786	mg/g	Lucerne Dehydrator 20/10	NA	NA	81032	NA	1	1		W9A09COLE_RFD	COLE
1013	JANZ	113451	2009	665	4	5	13	W9A09COLE	278	27	51	1	2	IRR	81033	1.4973	mg/g	Leeton Hurricane 20/10	NA	NA	81033	NA	1	1		W9A09COLE_IRR	COLE
1014	LPB04_2386_1303	118055	2009	2897	4	5	14	W9A09YANA	292	30	103	2	4	IRR	81034	1.6293	mg/g	Hurricane Dehydrator 13/10/09	NA	NA	81034	NA	1	1		W9A09YANA_IRR	YANA
1015	B1227E	114569	2009	2208	4	5	15	W9A09YANA	41	3	73	2	3	RFD	81035	1.0035	mg/g	Lucerne Dehydrator 5/10 - 13/10	NA	NA	81035	82650	1	2		W9A09YANA_RFD	YANA
1016	LPB04_2351	111402	2009	469	4	5	16	W9A09COLE	288	10	42	1	2	IRR	81036	2.5556	mg/g	Leeton Hurricane 20/10	NA	NA	81036	NA	1	1		W9A09COLE_IRR	COLE
1017	WW18919	116511	2009	2399	4	5	17	W9A09YANA	682	18	95	2	3	RFD	81037	0.60095	mg/g	Lucerne Dehydrator 5/10 - 13/10	NA	NA	81037	NA	1	1		W9A09YANA_RFD	YANA
1018	WW19632	113863	2009	1426	4	5	18	W9A09COLE	719	30	103	2	4	RFD	81038	2.5587	mg/g	Lucerne Dehydrator 19/10	NA	NA	81038	NA	1	1		W9A09COLE_RFD	COLE
1019	HRZ06_0147	114784	2009	1538	4	5	19	W9A09YANA	224	5	32	1	1	IRR	81039	1.3421	mg/g	Lucerne Dehydrator 5/10 - 13/10	NA	NA	81039	NA	1	1		W9A09YANA_IRR	YANA
1020	VW0779	116753	2009	2419	4	5	20	W9A09YANA	437	20	81	2	3	RFD	81040	1.5276	mg/g	Lucerne Dehydrator 5/10 - 13/10	NA	NA	81040	81951	1	2		W9A09YANA_RFD	YANA
1021	EGA_EAGLEHAWK	116060	2009	1680	4	5	21	W9A09YANA	61	15	28	1	1	IRR	81041	0.45575	mg/g	Lucerne Dehydrator 5/10 - 13/10	NA	NA	81041	NA	1	1		W9A09YANA_IRR	YANA
1022	WW19746	117558	2009	2851	4	5	22	W9A09YANA	736	26	118	2	4	IRR	81042	1.5439	mg/g	Hurricane Dehydrator 13/10/09	NA	NA	81042	NA	1	1		W9A09YANA_IRR	YANA
1023	VW0857	111071	2009	802	4	5	23	W9A09COLE	440	7	71	2	3	IRR	81043	1.2367	mg/g	Lucerne Dehydrator 19/10	NA	NA	81043	NA	1	1		W9A09COLE_IRR	COLE
1024	HRZ06_0265	115441	2009	1953	4	5	24	W9A09YANA	237	10	49	1	2	RFD	81044	1.5914	mg/g	Lucerne Dehydrator then Leeton Farm 13/10/09	NA	NA	81044	81718	1	2		W9A09YANA_RFD	YANA
1025	VW0779	113695	2009	692	4	5	25	W9A09COLE	437	29	55	1	2	IRR	81045	2.6719	mg/g	Leeton Hurricane 20/10	NA	NA	81045	NA	1	1		W9A09COLE_IRR	COLE
1026	VW2092	112193	2009	1268	4	5	26	W9A09COLE	463	16	113	2	4	RFD	81046	1.126	mg/g	Lucerne Dehydrator 19/10	NA	NA	81046	NA	1	1		W9A09COLE_RFD	COLE
1027	WW19663	114071	2009	1074	4	5	27	W9A09COLE	727	32	71	2	3	IRR	81047	2.0628	mg/g	Yanco Hurricane 19/10	NA	NA	81047	NA	1	1		W9A09COLE_IRR	COLE
1028	HRZ06_0250	113275	2009	1363	4	5	28	W9A09COLE	232	25	115	2	4	RFD	81048	1.4104	mg/g	Lucerne Dehydrator 19/10	NA	NA	81048	82965	1	2		W9A09COLE_RFD	COLE
1029	GASCOIGNE	114722	2009	2585	4	5	29	W9A09YANA	71	4	98	2	4	IRR	81049	1.4516	mg/g	Hurricane Dehydrator 13/10/09	NA	NA	81049	NA	1	1		W9A09YANA_IRR	YANA
1030	VW0241	117769	2009	2504	4	5	30	W9A09YANA	419	28	73	2	3	RFD	81050	1.4708	mg/g	Lucerne Dehydrator then Leeton Farm 13/10/09	NA	NA	81050	NA	1	1		W9A09YANA_RFD	YANA
1031	VW1190	116387	2009	2714	4	6	1	W9A09YANA	447	17	99	2	4	IRR	81051	1.7283	mg/g	Hurricane Dehydrator 13/10/09	NA	NA	81051	NA	1	1		W9A09YANA_IRR	YANA
1032	IRENA/BABAX//PASTOR	111855	2009	152	4	6	2	W9A09COLE	277	14	15	1	1	RFD	81052	2.6237	mg/g	Lucerne Dehydrator 20/10	NA	NA	81052	82500	1	2		W9A09COLE_RFD	COLE
1033	WAGT033	114646	2009	1521	4	6	3	W9A09YANA	530	4	22	1	1	IRR	81053	2.1118	mg/g	Lucerne Dehydrator 13/10/09	NA	NA	81053	NA	1	1		W9A09YANA_IRR	YANA
1034	WW13710	115279	2009	1587	4	6	4	W9A09YANA	567	9	15	1	1	IRR	81054	1.4967	mg/g	Lucerne Dehydrator 5/10 - 13/10	NA	NA	81054	NA	1	1		W9A09YANA_IRR	YANA
1035	VW2847	118147	2009	2544	4	6	5	W9A09YANA	484	31	67	2	3	RFD	81055	1.2845	mg/g	Lucerne Dehydrator 5/10 - 13/10	NA	NA	81055	NA	1	1		W9A09YANA_RFD	YANA
1036	WW20571	117913	2009	2526	4	6	6	W9A09YANA	775	29	89	2	3	RFD	81056	0.79708	mg/g	Lucerne Dehydrator then Leeton Farm 13/10/09	NA	NA	81056	NA	1	1		W9A09YANA_RFD	YANA
1037	WYUNA	116124	2009	2360	4	6	7	W9A09YANA	839	15	92	2	3	RFD	81057	1.3235	mg/g	Lucerne Dehydrator then Leeton Farm 13/10/09	NA	NA	81057	81798	1	2		W9A09YANA_RFD	YANA
1038	HRZ06_0299	112065	2009	1253	4	6	8	W9A09COLE	244	15	105	2	4	RFD	81058	1.9662	mg/g	Lucerne Dehydrator 19/10	NA	NA	81058	NA	1	1		W9A09COLE_RFD	COLE
1039	VW0644	111634	2009	490	4	6	9	W9A09COLE	433	12	34	1	2	IRR	81059	1.5177	mg/g	Leeton Hurricane 20/10	NA	NA	81059	83115	1	2		W9A09COLE_IRR	COLE
1040	SUN562A	112911	2009	1344	4	6	10	W9A09COLE	366	22	111	2	4	RFD	81060	2.2227	mg/g	Lucerne Dehydrator 19/10	NA	NA	81060	NA	1	1		W9A09COLE_RFD	COLE
1041	HRZ04_0191	114702	2009	2220	4	6	11	W9A09YANA	122	4	78	2	3	RFD	81061	1.4475	mg/g	Lucerne Dehydrator 5/10 - 13/10	NA	NA	81061	NA	1	1		W9A09YANA_RFD	YANA
1042	RAC1429	117516	2009	2483	4	6	12	W9A09YANA	332	26	76	2	3	RFD	81062	1.4742	mg/g	Lucerne Dehydrator 5/10 - 13/10	NA	NA	81062	NA	1	1		W9A09YANA_RFD	YANA
1043	WAGT019	115103	2009	2261	4	6	13	W9A09YANA	523	7	95	2	3	RFD	81063	1.3449	mg/g	Lucerne Dehydrator 5/10 - 13/10	NA	NA	81063	82243	1	2		W9A09YANA_RFD	YANA
1044	VW4192	115289	2009	1593	4	6	14	W9A09YANA	518	9	25	1	1	IRR	81064	1.66	mg/g	Lucerne Dehydrator 13/10/09	NA	NA	81064	NA	1	1		W9A09YANA_IRR	YANA
1045	HRZ04_0354	113746	2009	1409	4	6	15	W9A09COLE	142	29	106	2	4	RFD	81065	1.8874	mg/g	Lucerne Dehydrator 19/10	NA	NA	81065	NA	1	1		W9A09COLE_RFD	COLE
1046	HRZ06_0488	113364	2009	1006	4	6	16	W9A09COLE	252	26	84	2	3	IRR	81066	2.1969	mg/g	Yanco Hurricane 19/10	NA	NA	81066	NA	1	1		W9A09COLE_IRR	COLE
1047	SENTINEL	113230	2009	992	4	6	17	W9A09COLE	347	25	70	2	3	IRR	81067	2.441	mg/g	Yanco Hurricane 19/10	NA	NA	81067	NA	1	1		W9A09COLE_IRR	COLE
1048	WW19884	113418	2009	290	4	6	18	W9A09COLE	745	27	18	1	1	RFD	81068	2.2878	mg/g	Yanco Hurricane 20/10	NA	NA	81068	82974	1	2		W9A09COLE_RFD	COLE
1049	QT13390	116427	2009	1707	4	6	19	W9A09YANA	316	18	11	1	1	IRR	81069	1.656	mg/g	Lucerne Dehydrator 5/10 - 13/10	NA	NA	81069	NA	1	1		W9A09YANA_IRR	YANA
1050	QT12844	112856	2009	612	4	6	20	W9A09COLE	307	22	56	1	2	IRR	81070	2.6368	mg/g	Leeton Hurricane 20/10	NA	NA	81070	NA	1	1		W9A09COLE_IRR	COLE
1051	HRZ06_0292	110874	2009	1150	4	6	21	W9A09COLE	243	5	114	2	4	RFD	81071	1.6787	mg/g	Lucerne Dehydrator 19/10	NA	NA	81071	NA	1	1		W9A09COLE_RFD	COLE
1052	HRZ06_2082	115294	2009	1596	4	6	22	W9A09YANA	265	9	30	1	1	IRR	81072	1.2898	mg/g	Lucerne Dehydrator 13/10/09	NA	NA	81072	NA	1	1		W9A09YANA_IRR	YANA
1053	VT1155	110357	2009	739	4	6	23	W9A09COLE	384	1	77	2	3	IRR	81073	1.2396	mg/g	Yanco Hurricane 19/10	NA	NA	81073	NA	1	1		W9A09COLE_IRR	COLE
1054	HRZ06_0078	111056	2009	432	4	6	24	W9A09COLE	219	7	56	1	2	IRR	81074	1.8026	mg/g	Leeton Hurricane 20/10	NA	NA	81074	NA	1	1		W9A09COLE_IRR	COLE
1055	VW0241	114429	2009	1848	4	6	25	W9A09YANA	419	2	61	1	2	RFD	81075	1.4013	mg/g	Lucerne Dehydrator 5/10 - 13/10	NA	NA	81075	NA	1	1		W9A09YANA_RFD	YANA
1056	ATTILA	112583	2009	213	4	6	26	W9A09COLE	25	20	23	1	1	RFD	81076	1.6538	mg/g	Yanco Hurricane 20/10	NA	NA	81076	81737	1	2		W9A09COLE_RFD	COLE
1057	HRZ04_0191	113433	2009	658	4	6	27	W9A09COLE	122	27	33	1	2	IRR	81077	1.1887	mg/g	Leeton Hurricane 20/10	NA	NA	81077	NA	1	1		W9A09COLE_IRR	COLE
1058	VW2001	110675	2009	398	4	6	28	W9A09COLE	461	4	35	1	2	IRR	81078	1.8712	mg/g	Leeton Hurricane 20/10	NA	NA	81078	NA	1	1		W9A09COLE_IRR	COLE
1059	AUS33697	112818	2009	227	4	6	29	W9A09COLE	38	22	18	1	1	RFD	81079	1.7694	mg/g	Yanco Hurricane 20/10	NA	NA	81079	NA	1	1		W9A09COLE_RFD	COLE
1060	WW18784	111794	2009	869	4	6	30	W9A09COLE	670	13	74	2	3	IRR	81080	0.77723	mg/g	Lucerne Dehydrator 19/10	NA	NA	81080	82300	1	2		W9A09COLE_IRR	COLE
1061	HRZ06_0488	115406	2009	1599	4	7	1	W9A09YANA	252	10	14	1	1	IRR	81081	1.9286	mg/g	Lucerne Dehydrator 5/10 - 13/10	NA	NA	81081	81838	1	2		W9A09YANA_IRR	YANA
1062	VENTURA	115841	2009	2322	4	7	3	W9A09YANA	376	13	65	2	3	RFD	81083	0.9896	mg/g	Lucerne Dehydrator 5/10 - 13/10	NA	NA	81083	NA	1	1		W9A09YANA_RFD	YANA
1063	VW1498	115544	2009	1619	4	7	4	W9A09YANA	455	11	24	1	1	IRR	81084	1.4431	mg/g	Hurricane Dehydrator 13/10/09	NA	NA	81084	NA	1	1		W9A09YANA_IRR	YANA
1064	HRZ05_0132	112988	2009	969	4	7	6	W9A09COLE	172	23	68	2	3	IRR	81086	2.0811	mg/g	Yanco Hurricane 19/10	NA	NA	81086	82759	1	2		W9A09COLE_IRR	COLE
1065	VW3707	117191	2009	1755	4	7	7	W9A09YANA	505	24	7	1	1	IRR	81087	1.4807	mg/g	Lucerne Dehydrator 5/10 - 13/10	NA	NA	81087	NA	1	1		W9A09YANA_IRR	YANA
1066	VW0373	113257	2009	1359	4	7	8	W9A09COLE	424	25	97	2	4	RFD	81088	1.3954	mg/g	Lucerne Dehydrator 19/10	NA	NA	81088	NA	1	1		W9A09COLE_RFD	COLE
1067	CATALINA	115258	2009	2619	4	7	9	W9A09YANA	51	8	122	2	4	IRR	81089	1.8398	mg/g	Hurricane Dehydrator 13/10/09	NA	NA	81089	NA	1	1		W9A09YANA_IRR	YANA
1068	VW0720	110622	2009	1121	4	7	10	W9A09COLE	434	3	102	2	4	RFD	81090	1.3175	mg/g	Lucerne Dehydrator 19/10	NA	NA	81090	NA	1	1		W9A09COLE_RFD	COLE
1069	LPB04_2386_1303	116331	2009	2028	4	7	11	W9A09YANA	292	17	43	1	2	RFD	81091	1.6179	mg/g	Lucerne Dehydrator then Leeton Farm 13/10/09	NA	NA	81091	82593	1	2		W9A09YANA_RFD	YANA
1070	PAVON_DWARF	110880	2009	1152	4	7	12	W9A09COLE	301	5	120	2	4	RFD	81092	1.0833	mg/g	Lucerne Dehydrator 19/10	NA	NA	81092	NA	1	1		W9A09COLE_RFD	COLE
1071	WW19733	115654	2009	1624	4	7	13	W9A09YANA	734	12	6	1	1	IRR	81093	0.85661	mg/g	Lucerne Dehydrator 5/10 - 13/10	NA	NA	81093	NA	1	1		W9A09YANA_IRR	YANA
1072	WW18919	113060	2009	257	4	7	14	W9A09COLE	682	24	20	1	1	RFD	81094	1.2068	mg/g	Yanco Hurricane 20/10	NA	NA	81094	83030	1	2		W9A09COLE_RFD	COLE
1073	R901D	110602	2009	756	4	7	15	W9A09COLE	322	3	82	2	3	IRR	81095	2.3207	mg/g	Lucerne Dehydrator 19/10	NA	NA	81095	NA	1	1		W9A09COLE_IRR	COLE
1074	ELLISON	118141	2009	2190	4	7	16	W9A09YANA	67	31	61	1	2	RFD	81096	1.7687	mg/g	Lucerne Dehydrator 5/10 - 13/10	NA	NA	81096	NA	1	1		W9A09YANA_RFD	YANA
1075	HRZ06_0321	113773	2009	321	4	7	17	W9A09COLE	247	30	13	1	1	RFD	81097	2.3521	mg/g	Yanco Hurricane 20/10	NA	NA	81097	NA	1	1		W9A09COLE_RFD	COLE
1076	WW19663	116582	2009	2044	4	7	18	W9A09YANA	727	19	38	1	2	RFD	81098	1.2811	mg/g	Lucerne Dehydrator 5/10 - 13/10	NA	NA	81098	NA	1	1		W9A09YANA_RFD	YANA
1077	WW14396	113126	2009	988	4	7	19	W9A09COLE	583	24	86	2	3	IRR	81099	1.9678	mg/g	Yanco Hurricane 19/10	NA	NA	81099	82340	1	2		W9A09COLE_IRR	COLE
1078	BARHAM	117170	2009	2810	4	7	20	W9A09YANA	48	23	114	2	4	IRR	81100	1.7041	mg/g	Hurricane Dehydrator 13/10/09	NA	NA	81100	NA	1	1		W9A09YANA_IRR	YANA
1079	LPB04_2324	112302	2009	1277	4	7	21	W9A09COLE	287	17	102	2	4	RFD	81101	1.1436	mg/g	Lucerne Dehydrator 19/10	NA	NA	81101	NA	1	1		W9A09COLE_RFD	COLE
1080	WW21843	114811	2009	1888	4	7	22	W9A09YANA	830	5	59	1	2	RFD	81102	1.4913	mg/g	Hurricane Dehydrator 13/10/09	NA	NA	81102	81918	1	2		W9A09YANA_RFD	YANA
1081	VW3463	115587	2009	2300	4	7	23	W9A09YANA	497	11	67	2	3	RFD	81103	1.2473	mg/g	Lucerne Dehydrator 5/10 - 13/10	NA	NA	81103	NA	1	1		W9A09YANA_RFD	YANA
1082	WW18569	111418	2009	475	4	7	24	W9A09COLE	664	10	58	1	2	IRR	81104	1.8009	mg/g	Leeton Hurricane 20/10	NA	NA	81104	NA	1	1		W9A09COLE_IRR	COLE
1083	WW20652	115851	2009	2325	4	7	25	W9A09YANA	784	13	75	2	3	RFD	81105	1.3517	mg/g	Lucerne Dehydrator 5/10 - 13/10	NA	NA	81105	NA	1	1		W9A09YANA_RFD	YANA
1084	WW20140	111624	2009	131	4	7	26	W9A09COLE	755	12	24	1	1	RFD	81106	1.8626	mg/g	Lucerne Dehydrator 20/10	NA	NA	81106	NA	1	1		W9A09COLE_RFD	COLE
1085	WW19473	116533	2009	2738	4	7	27	W9A09YANA	703	18	117	2	4	IRR	81107	1.4878	mg/g	Hurricane Dehydrator 13/10/09	NA	NA	81107	NA	1	1		W9A09YANA_IRR	YANA
1086	HRZ06_0065	112994	2009	972	4	7	28	W9A09COLE	211	23	74	2	3	IRR	81108	2.0725	mg/g	Yanco Hurricane 19/10	NA	NA	81108	NA	1	1		W9A09COLE_IRR	COLE
1087	WW19514	115145	2009	1571	4	7	29	W9A09YANA	708	8	9	1	1	IRR	81109	1.8715	mg/g	Lucerne Dehydrator 5/10 - 13/10	NA	NA	81109	NA	1	1		W9A09YANA_IRR	YANA
1088	HRZ05_0224	114724	2009	2587	4	7	30	W9A09YANA	187	4	100	2	4	IRR	81110	1.2777	mg/g	Hurricane Dehydrator 13/10/09	NA	NA	81110	NA	1	1		W9A09YANA_IRR	YANA
1089	CATALINA	111465	2009	1200	4	8	1	W9A09COLE	51	10	105	2	4	RFD	81111	1.7427	mg/g	Lucerne Dehydrator 19/10	NA	NA	81111	NA	1	1		W9A09COLE_RFD	COLE
1090	AUS33466	111975	2009	165	4	8	2	W9A09COLE	27	15	15	1	1	RFD	81112	1.6278	mg/g	Lucerne Dehydrator 20/10	NA	NA	81112	NA	1	1		W9A09COLE_RFD	COLE
1091	WW13735	110986	2009	1158	4	8	3	W9A09COLE	568	6	106	2	4	RFD	81113	1.3085	mg/g	Lucerne Dehydrator 19/10	NA	NA	81113	NA	1	1		W9A09COLE_RFD	COLE
1092	WW19684	117050	2009	2799	4	8	4	W9A09YANA	731	22	122	2	4	IRR	81114	1.6042	mg/g	Hurricane Dehydrator 13/10/09	NA	NA	81114	NA	1	1		W9A09YANA_IRR	YANA
1093	SUN534D	112167	2009	907	4	8	5	W9A09COLE	359	16	87	2	3	IRR	81115	1.4315	mg/g	Yanco Hurricane 19/10	NA	NA	81115	82187	1	2		W9A09COLE_IRR	COLE
1094	WW15839	115560	2009	1960	4	8	6	W9A09YANA	601	11	40	1	2	RFD	81116	1.2186	mg/g	Lucerne Dehydrator 5/10 - 13/10	NA	NA	81116	NA	1	1		W9A09YANA_RFD	YANA
1095	VW3473	114144	2009	361	4	8	7	W9A09COLE	500	33	24	1	1	RFD	81117	1.4427	mg/g	Yanco Hurricane 20/10	NA	NA	81117	NA	1	1		W9A09COLE_RFD	COLE
1096	VW4368	115267	2009	1585	4	8	8	W9A09YANA	521	9	3	1	1	IRR	81118	1.5339	mg/g	Lucerne Dehydrator 5/10 - 13/10	NA	NA	81118	NA	1	1		W9A09YANA_IRR	YANA
1097	WW19891	113093	2009	631	4	8	9	W9A09COLE	746	24	53	1	2	IRR	81119	2.2058	mg/g	Leeton Hurricane 20/10	NA	NA	81119	NA	1	1		W9A09COLE_IRR	COLE
1098	120854_183	110529	2009	28	4	8	10	W9A09COLE	4	3	9	1	1	RFD	81120	1.4922	mg/g	Lucerne Dehydrator 20/10	NA	NA	81120	83204	1	2		W9A09COLE_RFD	COLE
1099	120854_183	116321	2009	2025	4	8	11	W9A09YANA	4	17	33	1	2	RFD	81121	1.518	mg/g	Lucerne Dehydrator 5/10 - 13/10	NA	NA	81121	NA	1	1		W9A09YANA_RFD	YANA
1100	WW17950	111607	2009	123	4	8	12	W9A09COLE	625	12	7	1	1	RFD	81122	1.7636	mg/g	Lucerne Dehydrator 20/10	NA	NA	81122	NA	1	1		W9A09COLE_RFD	COLE
1101	EGA_STAMPEDE	112617	2009	589	4	8	13	W9A09COLE	64	20	57	1	2	IRR	81123	0.81422	mg/g	Leeton Hurricane 20/10	NA	NA	81123	NA	1	1		W9A09COLE_IRR	COLE
1102	WW19662	115581	2009	1971	4	8	14	W9A09YANA	726	11	61	1	2	RFD	81124	0.97253	mg/g	Lucerne Dehydrator then Leeton Farm 13/10/09	NA	NA	81124	NA	1	1		W9A09YANA_RFD	YANA
1103	WW19733	115325	2009	1947	4	8	15	W9A09YANA	734	9	61	1	2	RFD	81125	0.92143	mg/g	Lucerne Dehydrator 5/10 - 13/10	NA	NA	81125	NA	1	1		W9A09YANA_RFD	YANA
1104	WW16367	113945	2009	1064	4	8	16	W9A09COLE	604	31	65	2	3	IRR	81126	2.0246	mg/g	Yanco Hurricane 19/10	NA	NA	81126	NA	1	1		W9A09COLE_IRR	COLE
1105	HRZ06_0147	117778	2009	2510	4	8	17	W9A09YANA	224	28	82	2	3	RFD	81127	1.4053	mg/g	Lucerne Dehydrator then Leeton Farm 13/10/09	NA	NA	81127	82496	1	2		W9A09YANA_RFD	YANA
1106	WW14309	114111	2009	1450	4	8	18	W9A09COLE	580	32	111	2	4	RFD	81128	2.3825	mg/g	Lucerne Dehydrator 19/10	NA	NA	81128	NA	1	1		W9A09COLE_RFD	COLE
1107	EGA_WILLS	117996	2009	2172	4	8	19	W9A09YANA	66	30	44	1	2	RFD	81129	1.6855	mg/g	Lucerne Dehydrator 5/10 - 13/10	NA	NA	81129	NA	1	1		W9A09YANA_RFD	YANA
1108	WW20571	111445	2009	843	4	8	20	W9A09COLE	775	10	85	2	3	IRR	81130	1.7106	mg/g	Lucerne Dehydrator 19/10	NA	NA	81130	NA	1	1		W9A09COLE_IRR	COLE
1109	VW3174	115575	2009	1968	4	8	21	W9A09YANA	487	11	55	1	2	RFD	81131	1.0494	mg/g	Lucerne Dehydrator then Leeton Farm 13/10/09	NA	NA	81131	81842	1	2		W9A09YANA_RFD	YANA
1110	VW3717	111900	2009	523	4	8	22	W9A09COLE	509	14	60	1	2	IRR	81132	1.5582	mg/g	Leeton Hurricane 20/10	NA	NA	81132	NA	1	1		W9A09COLE_IRR	COLE
1111	HRZ06_0067	112528	2009	937	4	8	23	W9A09COLE	213	19	88	2	3	IRR	81133	1.5218	mg/g	Yanco Hurricane 19/10	NA	NA	81133	NA	1	1		W9A09COLE_IRR	COLE
1112	VW3405	112378	2009	565	4	8	24	W9A09COLE	494	18	58	1	2	IRR	81134	0.9221	mg/g	Leeton Hurricane 20/10	NA	NA	81134	NA	1	1		W9A09COLE_IRR	COLE
1113	WW19750	117475	2009	2121	4	8	25	W9A09YANA	737	26	35	1	2	RFD	81135	1.5658	mg/g	Lucerne Dehydrator then Leeton Farm 13/10/09	NA	NA	81135	NA	1	1		W9A09YANA_RFD	YANA
1114	HRZ06_0270	117471	2009	1776	4	8	26	W9A09YANA	239	26	31	1	1	IRR	81136	0.90518	mg/g	Lucerne Dehydrator 5/10 - 13/10	NA	NA	81136	NA	1	1		W9A09YANA_IRR	YANA
1115	DAKOTA	110916	2009	415	4	8	27	W9A09COLE	56	6	36	1	2	IRR	81137	1.6308	mg/g	Leeton Hurricane 20/10	NA	NA	81137	82619	1	2		W9A09COLE_IRR	COLE
1116	WW20577	115593	2009	2301	4	8	28	W9A09YANA	776	11	73	2	3	RFD	81138	0.67858	mg/g	Lucerne Dehydrator 5/10 - 13/10	NA	NA	81138	NA	1	1		W9A09YANA_RFD	YANA
1117	SERI_DWARF	116551	2009	1716	4	8	29	W9A09YANA	348	19	7	1	1	IRR	81139	2.1444	mg/g	Lucerne Dehydrator 5/10 - 13/10	NA	NA	81139	82482	1	2		W9A09YANA_IRR	YANA
1118	HRZ06_0319	115990	2009	2346	4	8	30	W9A09YANA	246	14	86	2	3	RFD	81140	1.6944	mg/g	Lucerne Dehydrator then Leeton Farm 13/10/09	NA	NA	81140	NA	1	1		W9A09YANA_RFD	YANA
1119	VW2705	111942	2009	1243	4	9	1	W9A09COLE	480	14	102	2	4	RFD	81141	1.439	mg/g	Lucerne Dehydrator 19/10	NA	NA	81141	NA	1	1		W9A09COLE_RFD	COLE
1120	EGA_STAMPEDE	117162	2009	2807	4	9	2	W9A09YANA	64	23	106	2	4	IRR	81142	1.7996	mg/g	Hurricane Dehydrator 13/10/09	NA	NA	81142	NA	1	1		W9A09YANA_IRR	YANA
1121	CATALINA	115578	2009	1970	4	9	3	W9A09YANA	51	11	58	1	2	RFD	81143	1.6783	mg/g	Lucerne Dehydrator 5/10 - 13/10	NA	NA	81143	82373	1	2		W9A09YANA_RFD	YANA
1122	HRZ06_2202	113918	2009	703	4	9	4	W9A09COLE	274	31	38	1	2	IRR	81144	2.3618	mg/g	Leeton Hurricane 20/10	NA	NA	81144	NA	1	1		W9A09COLE_IRR	COLE
1123	VW3174	113975	2009	1431	4	9	5	W9A09COLE	487	31	95	2	4	RFD	81145	2.0376	mg/g	Lucerne Dehydrator 19/10	NA	NA	81145	NA	1	1		W9A09COLE_RFD	COLE
1124	VW0379	110350	2009	734	4	9	6	W9A09COLE	425	1	70	2	3	IRR	81146	1.2041	mg/g	Lucerne Dehydrator 19/10	NA	NA	81146	NA	1	1		W9A09COLE_IRR	COLE
1125	WW17950	113957	2009	1067	4	9	7	W9A09COLE	625	31	77	2	3	IRR	81147	2.2935	mg/g	Yanco Hurricane 19/10	NA	NA	81147	NA	1	1		W9A09COLE_IRR	COLE
1126	334609_1	118050	2009	2894	4	9	8	W9A09YANA	9	30	98	2	4	IRR	81148	1.877	mg/g	Hurricane Dehydrator 13/10/09	NA	NA	81148	82551	1	2		W9A09YANA_IRR	YANA
1127	HRZ06_0292	116344	2009	2032	4	9	9	W9A09YANA	243	17	56	1	2	RFD	81149	1.2558	mg/g	Lucerne Dehydrator then Leeton Farm 13/10/09	NA	NA	81149	NA	1	1		W9A09YANA_RFD	YANA
1128	LANG	115800	2009	1653	4	9	10	W9A09YANA	279	13	24	1	1	IRR	81150	1.478	mg/g	Lucerne Dehydrator 5/10 - 13/10	NA	NA	81150	NA	1	1		W9A09YANA_IRR	YANA
1129	WW19514	117931	2009	2880	4	9	11	W9A09YANA	708	29	107	2	4	IRR	81151	1.8274	mg/g	Hurricane Dehydrator 13/10/09	NA	NA	81151	NA	1	1		W9A09YANA_IRR	YANA
1130	118849_303	116824	2009	1736	4	9	12	W9A09YANA	3	21	24	1	1	IRR	81152	1.5383	mg/g	Lucerne Dehydrator 5/10 - 13/10	NA	NA	81152	82765	1	2		W9A09YANA_IRR	YANA
1131	WW20667	112242	2009	551	4	9	13	W9A09COLE	787	17	42	1	2	IRR	81153	2.3234	mg/g	Leeton Hurricane 20/10	NA	NA	81153	NA	1	1		W9A09COLE_IRR	COLE
1132	WW19201	112595	2009	583	4	9	14	W9A09COLE	697	20	35	1	2	IRR	81154	1.7491	mg/g	Leeton Hurricane 20/10	NA	NA	81154	NA	1	1		W9A09COLE_IRR	COLE
1133	WW20068	113843	2009	1058	4	9	15	W9A09COLE	753	30	83	2	3	IRR	81155	1.9486	mg/g	Yanco Hurricane 19/10	NA	NA	81155	83006	1	2		W9A09COLE_IRR	COLE
1134	HRZ04_0206	114756	2009	1527	4	9	16	W9A09YANA	128	5	4	1	1	IRR	81156	1.2133	mg/g	Lucerne Dehydrator 5/10 - 13/10	NA	NA	81156	NA	1	1		W9A09YANA_IRR	YANA
1135	HRZ05_0130	114900	2009	1550	4	9	17	W9A09YANA	170	6	20	1	1	IRR	81157	1.1261	mg/g	Lucerne Dehydrator 5/10 - 13/10	NA	NA	81157	NA	1	1		W9A09YANA_IRR	YANA
1136	WW20192	116407	2009	2724	4	9	18	W9A09YANA	757	17	119	2	4	IRR	81158	1.393	mg/g	Hurricane Dehydrator 13/10/09	NA	NA	81158	NA	1	1		W9A09YANA_IRR	YANA
1137	VW2001	116337	2009	2031	4	9	19	W9A09YANA	461	17	49	1	2	RFD	81159	1.2568	mg/g	Lucerne Dehydrator 5/10 - 13/10	NA	NA	81159	NA	1	1		W9A09YANA_RFD	YANA
1138	VW2843	113036	2009	1352	4	9	20	W9A09COLE	483	23	116	2	4	RFD	81160	1.17	mg/g	Lucerne Dehydrator 19/10	NA	NA	81160	83249	1	2		W9A09COLE_RFD	COLE
1139	VW3595	111530	2009	483	4	9	21	W9A09COLE	503	11	50	1	2	IRR	81161	1.2797	mg/g	Leeton Hurricane 20/10	NA	NA	81161	NA	1	1		W9A09COLE_IRR	COLE
1140	VW2708	115900	2009	2679	4	9	22	W9A09YANA	481	13	124	2	4	IRR	81162	2.1646	mg/g	Hurricane Dehydrator 13/10/09	NA	NA	81162	NA	1	1		W9A09YANA_IRR	YANA
1141	WAGT020	113017	2009	1347	4	9	23	W9A09COLE	524	23	97	2	4	RFD	81163	1.3659	mg/g	Lucerne Dehydrator 19/10	NA	NA	81163	NA	1	1		W9A09COLE_RFD	COLE
1142	HRZ06_0043	114505	2009	1495	4	9	24	W9A09YANA	200	3	9	1	1	IRR	81164	1.5693	mg/g	Lucerne Dehydrator 13/10/09	NA	NA	81164	NA	1	1		W9A09YANA_IRR	YANA
1143	VW2410	112253	2009	554	4	9	25	W9A09COLE	475	17	53	1	2	IRR	81165	0.66327	mg/g	Leeton Hurricane 20/10	NA	NA	81165	82017	1	2		W9A09COLE_IRR	COLE
1144	VW2311	110659	2009	45	4	9	26	W9A09COLE	465	4	19	1	1	RFD	81166	1.4402	mg/g	Lucerne Dehydrator 20/10	NA	NA	81166	NA	1	1		W9A09COLE_RFD	COLE
1145	WW20291	113827	2009	1055	4	9	27	W9A09COLE	763	30	67	2	3	IRR	81167	1.2101	mg/g	Yanco Hurricane 19/10	NA	NA	81167	NA	1	1		W9A09COLE_IRR	COLE
1146	VV2856	110691	2009	400	4	9	28	W9A09COLE	409	4	51	1	2	IRR	81168	1.6898	mg/g	Leeton Hurricane 20/10	NA	NA	81168	NA	1	1		W9A09COLE_IRR	COLE
1147	VT1020	112675	2009	1318	4	9	29	W9A09COLE	382	20	115	2	4	RFD	81169	1.4726	mg/g	Lucerne Dehydrator 19/10	NA	NA	81169	NA	1	1		W9A09COLE_RFD	COLE
1148	WW20406	115584	2009	1973	4	9	30	W9A09YANA	767	11	64	1	2	RFD	81170	0.87185	mg/g	Lucerne Dehydrator 5/10 - 13/10	NA	NA	81170	83185	1	2		W9A09YANA_RFD	YANA
1149	VW1256	118122	2009	2183	4	10	1	W9A09YANA	451	31	42	1	2	RFD	81171	2.0213	mg/g	Lucerne Dehydrator 5/10 - 13/10	NA	NA	81171	NA	1	1		W9A09YANA_RFD	YANA
1150	WW14309	116357	2009	2371	4	10	2	W9A09YANA	580	17	69	2	3	RFD	81172	0.96968	mg/g	Lucerne Dehydrator 5/10 - 13/10	NA	NA	81172	NA	1	1		W9A09YANA_RFD	YANA
1151	WAWHT2793	110284	2009	3	4	10	3	W9A09COLE	536	1	4	1	1	RFD	81173	1.0069	mg/g	Yanco Hurricane 20/10	NA	NA	81173	NA	1	1		W9A09COLE_RFD	COLE
1152	WW19891	111945	2009	1245	4	10	5	W9A09COLE	746	14	105	2	4	RFD	81175	1.6739	mg/g	Lucerne Dehydrator 19/10	NA	NA	81175	NA	1	1		W9A09COLE_RFD	COLE
1153	HRZ06_0145	110994	2009	1164	4	10	6	W9A09COLE	223	6	114	2	4	RFD	81176	1.7073	mg/g	Lucerne Dehydrator 19/10	NA	NA	81176	NA	1	1		W9A09COLE_RFD	COLE
1154	WW19750	112786	2009	1329	4	10	7	W9A09COLE	737	21	106	2	4	RFD	81177	2.0708	mg/g	Lucerne Dehydrator 19/10	NA	NA	81177	82833	1	2		W9A09COLE_RFD	COLE
1155	HRZ06_0034	113010	2009	980	4	10	8	W9A09COLE	193	23	90	2	3	IRR	81178	2.0443	mg/g	Yanco Hurricane 19/10	NA	NA	81178	NA	1	1		W9A09COLE_IRR	COLE
1156	VW3473	115953	2009	2000	4	10	9	W9A09YANA	500	14	49	1	2	RFD	81179	1.1433	mg/g	Lucerne Dehydrator 5/10 - 13/10	NA	NA	81179	NA	1	1		W9A09YANA_RFD	YANA
1157	VW0644	115265	2009	1583	4	10	10	W9A09YANA	433	9	1	1	1	IRR	81180	1.3821	mg/g	Lucerne Dehydrator 5/10 - 13/10	NA	NA	81180	NA	1	1		W9A09YANA_IRR	YANA
1158	HRZ04_0420	112787	2009	1330	4	10	11	W9A09COLE	146	21	107	2	4	RFD	81181	2.2648	mg/g	Lucerne Dehydrator 19/10	NA	NA	81181	83065	1	2		W9A09COLE_RFD	COLE
1159	SUN530D	115706	2009	1977	4	10	12	W9A09YANA	358	12	58	1	2	RFD	81182	1.2692	mg/g	Lucerne Dehydrator then Leeton Farm 13/10/09	NA	NA	81182	NA	1	1		W9A09YANA_RFD	YANA
1160	WW13710	112004	2009	529	4	10	13	W9A09COLE	567	15	44	1	2	IRR	81183	1.307	mg/g	Leeton Hurricane 20/10	NA	NA	81183	NA	1	1		W9A09COLE_IRR	COLE
1161	LPB03_1109	113220	2009	646	4	10	14	W9A09COLE	282	25	60	1	2	IRR	81184	1.7976	mg/g	Leeton Hurricane 20/10	NA	NA	81184	NA	1	1		W9A09COLE_IRR	COLE
1162	WW20068	117998	2009	2173	4	10	15	W9A09YANA	753	30	46	1	2	RFD	81185	1.7247	mg/g	Lucerne Dehydrator 5/10 - 13/10	NA	NA	81185	NA	1	1		W9A09YANA_RFD	YANA
1163	HRZ06_2178	116510	2009	2398	4	10	16	W9A09YANA	272	18	94	2	3	RFD	81186	0.96524	mg/g	Lucerne Dehydrator 5/10 - 13/10	NA	NA	81186	82000	1	2		W9A09YANA_RFD	YANA
1164	WW16259	112955	2009	617	4	10	17	W9A09COLE	603	23	35	1	2	IRR	81187	2.0006	mg/g	Leeton Hurricane 20/10	NA	NA	81187	NA	1	1		W9A09COLE_IRR	COLE
1165	WW16612	110725	2009	769	4	10	18	W9A09COLE	610	4	85	2	3	IRR	81188	1.3583	mg/g	Yanco Hurricane 19/10	NA	NA	81188	82126	1	2		W9A09COLE_IRR	COLE
1166	VW3397	111150	2009	95	4	10	19	W9A09COLE	490	8	30	1	1	RFD	81189	1.7349	mg/g	Lucerne Dehydrator 20/10	NA	NA	81189	NA	1	1		W9A09COLE_RFD	COLE
1167	HRZ06_0065	115036	2009	1565	4	10	20	W9A09YANA	211	7	28	1	1	IRR	81190	1.5254	mg/g	Lucerne Dehydrator 13/10/09	NA	NA	81190	NA	1	1		W9A09YANA_IRR	YANA
1168	ELLISON	113577	2009	681	4	10	21	W9A09COLE	67	28	57	1	2	IRR	81191	1.2942	mg/g	Leeton Hurricane 20/10	NA	NA	81191	NA	1	1		W9A09COLE_IRR	COLE
1169	HRZ03_0005	114198	2009	1089	4	10	22	W9A09COLE	88	33	78	2	3	IRR	81192	2.0469	mg/g	Yanco Hurricane 19/10	NA	NA	81192	NA	1	1		W9A09COLE_IRR	COLE
1170	VW3473	111348	2009	1189	4	10	23	W9A09COLE	500	9	108	2	4	RFD	81193	1.5132	mg/g	Lucerne Dehydrator 19/10	NA	NA	81193	81694	1	2		W9A09COLE_RFD	COLE
1171	WW19753	113650	2009	311	4	10	24	W9A09COLE	738	29	10	1	1	RFD	81194	1.6324	mg/g	Yanco Hurricane 20/10	NA	NA	81194	NA	1	1		W9A09COLE_RFD	COLE
1172	WW19147	113995	2009	1438	4	10	25	W9A09COLE	695	31	115	2	4	RFD	81195	2.2426	mg/g	Lucerne Dehydrator 19/10	NA	NA	81195	NA	1	1		W9A09COLE_RFD	COLE
1173	WW19932	111044	2009	427	4	10	26	W9A09COLE	747	7	44	1	2	IRR	81196	1.7314	mg/g	Leeton Hurricane 20/10	NA	NA	81196	NA	1	1		W9A09COLE_IRR	COLE
1174	MCCUBBIN	112333	2009	191	4	10	28	W9A09COLE	296	18	13	1	1	RFD	81198	2.531	mg/g	Lucerne Dehydrator 20/10	NA	NA	81198	82442	1	2		W9A09COLE_RFD	COLE
1175	WW19410	115942	2009	1998	4	10	29	W9A09YANA	701	14	38	1	2	RFD	81199	1.5274	mg/g	Lucerne Dehydrator then Leeton Farm 13/10/09	NA	NA	81199	NA	1	1		W9A09YANA_RFD	YANA
1176	LPB04_2324	113408	2009	284	4	10	30	W9A09COLE	287	27	8	1	1	RFD	81200	2.3767	mg/g	Yanco Hurricane 20/10	NA	NA	81200	NA	1	1		W9A09COLE_RFD	COLE
1177	HRZ05_0159	117770	2009	2505	5	1	1	W9A09YANA	182	28	74	2	3	RFD	81201	1.3711	mg/g	Lucerne Dehydrator then Leeton Farm 13/10/09	NA	NA	81201	NA	1	1		W9A09YANA_RFD	YANA
1178	WW20689	112476	2009	570	5	1	2	W9A09COLE	791	19	36	1	2	IRR	81202	1.6875	mg/g	Leeton Hurricane 20/10	NA	NA	81202	NA	1	1		W9A09COLE_IRR	COLE
1179	SUN571B	117784	2009	2512	5	1	3	W9A09YANA	369	28	88	2	3	RFD	81203	1.2185	mg/g	Lucerne Dehydrator then Leeton Farm 13/10/09	NA	NA	81203	82865	1	2		W9A09YANA_RFD	YANA
1180	WW18049	110724	2009	768	5	1	4	W9A09COLE	626	4	84	2	3	IRR	81204	1.9938	mg/g	Lucerne Dehydrator 19/10	NA	NA	81204	NA	1	1		W9A09COLE_IRR	COLE
1181	WW13602	118011	2009	2180	5	1	5	W9A09YANA	566	30	59	1	2	RFD	81205	1.4833	mg/g	Lucerne Dehydrator 5/10 - 13/10	NA	NA	81205	NA	1	1		W9A09YANA_RFD	YANA
1182	HRZ05_0130	113862	2009	1425	5	1	7	W9A09COLE	170	30	102	2	4	RFD	81207	2.7675	mg/g	Lucerne Dehydrator 19/10	NA	NA	81207	NA	1	1		W9A09COLE_RFD	COLE
1183	VT1022	118035	2009	2535	5	1	8	W9A09YANA	383	30	83	2	3	RFD	81208	1.3605	mg/g	Lucerne Dehydrator 5/10 - 13/10	NA	NA	81208	NA	1	1		W9A09YANA_RFD	YANA
1184	VV2678	116746	2009	2416	5	1	9	W9A09YANA	408	20	74	2	3	RFD	81209	1.3284	mg/g	Lucerne Dehydrator 5/10 - 13/10	NA	NA	81209	NA	1	1		W9A09YANA_RFD	YANA
1185	120854_183	117515	2009	2482	5	1	10	W9A09YANA	4	26	75	2	3	RFD	81210	1.6853	mg/g	Lucerne Dehydrator 5/10 - 13/10	NA	NA	81210	NA	1	1		W9A09YANA_RFD	YANA
1186	HRZ05_0245	110672	2009	397	5	1	11	W9A09COLE	188	4	32	1	2	IRR	81211	1.4173	mg/g	Leeton Hurricane 20/10	NA	NA	81211	82970	1	2		W9A09COLE_IRR	COLE
1187	WW18805	111107	2009	1171	5	1	12	W9A09COLE	673	7	107	2	4	RFD	81212	1.619	mg/g	Lucerne Dehydrator 19/10	NA	NA	81212	NA	1	1		W9A09COLE_RFD	COLE
1188	VW1498	115607	2009	2304	5	1	13	W9A09YANA	455	11	87	2	3	RFD	81213	0.78368	mg/g	Lucerne Dehydrator 5/10 - 13/10	NA	NA	81213	NA	1	1		W9A09YANA_RFD	YANA
1189	WAGT033	112968	2009	620	5	1	14	W9A09COLE	530	23	48	1	2	IRR	81214	2.671	mg/g	Leeton Hurricane 20/10	NA	NA	80430	81214	1	2		W9A09COLE_IRR	COLE
1190	WW20672	115297	2009	1933	5	1	15	W9A09YANA	788	9	33	1	2	RFD	81215	1.6714	mg/g	Lucerne Dehydrator then Leeton Farm 13/10/09	NA	NA	81215	NA	1	1		W9A09YANA_RFD	YANA
1191	VW3404	111776	2009	511	5	1	16	W9A09COLE	493	13	56	1	2	IRR	81216	0.51998	mg/g	Leeton Hurricane 20/10	NA	NA	81216	NA	1	1		W9A09COLE_IRR	COLE
1192	LPB04_2264	117806	2009	2869	5	1	17	W9A09YANA	285	28	110	2	4	IRR	81217	1.8443	mg/g	Hurricane Dehydrator 13/10/09	NA	NA	81217	NA	1	1		W9A09YANA_IRR	YANA
1193	GLADIUS	113500	2009	1381	5	1	18	W9A09COLE	77	27	100	2	4	RFD	81218	1.4423	mg/g	Lucerne Dehydrator 19/10	NA	NA	81218	81761	1	2		W9A09COLE_RFD	COLE
1194	VW2373	112474	2009	569	5	1	19	W9A09COLE	468	19	34	1	2	IRR	81219	2.4519	mg/g	Leeton Hurricane 20/10	NA	NA	81219	NA	1	1		W9A09COLE_IRR	COLE
1195	VW0373	118177	2009	2910	5	1	20	W9A09YANA	424	31	97	2	4	IRR	81220	1.9029	mg/g	Hurricane Dehydrator 13/10/09	NA	NA	81220	NA	1	1		W9A09YANA_IRR	YANA
1196	HRZ06_0270	111433	2009	834	5	1	21	W9A09COLE	239	10	73	2	3	IRR	81221	0.72891	mg/g	Lucerne Dehydrator 19/10	NA	NA	81221	NA	1	1	maybe emu	W9A09COLE_IRR	COLE
1197	WW16917	110744	2009	1135	5	1	22	W9A09COLE	611	4	104	2	4	RFD	81222	0.96646	mg/g	Lucerne Dehydrator 19/10	NA	NA	81222	NA	1	1		W9A09COLE_RFD	COLE
1198	WW19548	114184	2009	1083	5	1	23	W9A09COLE	710	33	64	2	3	IRR	81223	1.8622	mg/g	Yanco Hurricane 19/10	NA	NA	81223	82082	1	2		W9A09COLE_IRR	COLE
1199	VW3404	118059	2009	2901	5	1	24	W9A09YANA	493	30	107	2	4	IRR	81224	1.6351	mg/g	Hurricane Dehydrator 13/10/09	NA	NA	81224	NA	1	1		W9A09YANA_IRR	YANA
1200	VW2847	112282	2009	916	5	1	25	W9A09COLE	484	17	82	2	3	IRR	81225	1.5722	mg/g	Lucerne Dehydrator 19/10	NA	NA	81225	NA	1	1		W9A09COLE_IRR	COLE
1201	WW16612	115945	2009	1999	5	1	26	W9A09YANA	610	14	41	1	2	RFD	81226	1.1315	mg/g	Lucerne Dehydrator 5/10 - 13/10	NA	NA	81226	NA	1	1		W9A09YANA_RFD	YANA
1202	WW20140	117303	2009	2822	5	1	27	W9A09YANA	755	24	119	2	4	IRR	81227	1.8247	mg/g	Hurricane Dehydrator 13/10/09	NA	NA	81227	82682	1	2		W9A09YANA_IRR	YANA
1203	LPB04_2324	115359	2009	2287	5	1	28	W9A09YANA	287	9	95	2	3	RFD	81228	1.372	mg/g	Lucerne Dehydrator 5/10 - 13/10	NA	NA	81228	NA	1	1		W9A09YANA_RFD	YANA
1204	GBA0608	111572	2009	1204	5	1	29	W9A09COLE	73	11	92	2	4	RFD	81229	1.5086	mg/g	Lucerne Dehydrator 19/10	NA	NA	81229	NA	1	1		W9A09COLE_RFD	COLE
1205	MERINDA	110522	2009	25	5	1	30	W9A09COLE	297	3	2	1	1	RFD	81230	1.299	mg/g	Yanco Hurricane 20/10	NA	NA	81230	NA	1	1		W9A09COLE_RFD	COLE
1206	HRZ04_0191	112069	2009	1255	5	2	1	W9A09COLE	122	15	109	2	4	RFD	81231	0.93307	mg/g	Lucerne Dehydrator 19/10	NA	NA	81231	83217	1	2		W9A09COLE_RFD	COLE
1207	HRZ06_0004	114558	2009	1863	5	2	2	W9A09YANA	190	3	62	1	2	RFD	81232	1.5116	mg/g	Lucerne Dehydrator 5/10 - 13/10	NA	NA	81232	NA	1	1		W9A09YANA_RFD	YANA
1208	HRZ06_0079	110734	2009	1130	5	2	3	W9A09COLE	220	4	94	2	4	RFD	81233	1.8694	mg/g	Lucerne Dehydrator 19/10	NA	NA	81233	NA	1	1		W9A09COLE_RFD	COLE
1209	WW9696	114149	2009	364	5	2	4	W9A09COLE	837	33	29	1	1	RFD	81234	1.7096	mg/g	Yanco Hurricane 20/10	NA	NA	81234	83200	1	2		W9A09COLE_RFD	COLE
1210	GUARDIAN	116684	2009	1723	5	2	5	W9A09YANA	78	20	12	1	1	IRR	81235	1.7473	mg/g	Lucerne Dehydrator 5/10 - 13/10	NA	NA	81235	NA	1	1		W9A09YANA_IRR	YANA
1211	EGA_JAEGER	113708	2009	1037	5	2	6	W9A09COLE	63	29	68	2	3	IRR	81236	2.4861	mg/g	Yanco Hurricane 19/10	NA	NA	81236	NA	1	1		W9A09COLE_IRR	COLE
1212	WW19682	114180	2009	730	5	2	7	W9A09COLE	730	33	60	1	2	IRR	81237	1.9416	mg/g	Leeton Hurricane 20/10	NA	NA	81237	NA	1	1		W9A09COLE_IRR	COLE
1213	WW18946	117541	2009	2843	5	2	8	W9A09YANA	687	26	101	2	4	IRR	81238	1.4006	mg/g	Hurricane Dehydrator 13/10/09	NA	NA	81238	NA	1	1		W9A09YANA_IRR	YANA
1214	HRZ06_0004	113278	2009	1365	5	2	9	W9A09COLE	190	25	118	2	4	RFD	81239	2.1933	mg/g	Lucerne Dehydrator 19/10	NA	NA	81239	82409	1	2		W9A09COLE_RFD	COLE
1215	BARHAM	113704	2009	1035	5	2	10	W9A09COLE	48	29	64	2	3	IRR	81240	2.2227	mg/g	Yanco Hurricane 19/10	NA	NA	81240	NA	1	1		W9A09COLE_IRR	COLE
1216	VW1498	112888	2009	964	5	2	11	W9A09COLE	455	22	88	2	3	IRR	81241	2.011	mg/g	Yanco Hurricane 19/10	NA	NA	81241	NA	1	1		W9A09COLE_IRR	COLE
1217	AUS33697	117749	2009	2152	5	2	12	W9A09YANA	38	28	53	1	2	RFD	81242	1.1102	mg/g	Lucerne Dehydrator 5/10 - 13/10	NA	NA	81242	NA	1	1		W9A09YANA_RFD	YANA
1218	WW19525	112922	2009	235	5	2	13	W9A09COLE	709	23	2	1	1	RFD	81243	1.784	mg/g	Yanco Hurricane 20/10	NA	NA	81243	NA	1	1		W9A09COLE_RFD	COLE
1219	WW20558	114306	2009	2192	5	2	14	W9A09YANA	774	1	66	2	3	RFD	81244	1.1859	mg/g	Lucerne Dehydrator 5/10 - 13/10	NA	NA	81244	NA	1	1		W9A09YANA_RFD	YANA
1220	9329_13	117559	2009	2852	5	2	15	W9A09YANA	23	26	119	2	4	IRR	81245	1.819	mg/g	Hurricane Dehydrator 13/10/09	NA	NA	81245	NA	1	1		W9A09YANA_IRR	YANA
1221	VW3404	116423	2009	1705	5	2	16	W9A09YANA	493	18	7	1	1	IRR	81246	1.1761	mg/g	Lucerne Dehydrator 5/10 - 13/10	NA	NA	81246	82848	1	2		W9A09YANA_IRR	YANA
1222	WW18769	113783	2009	325	5	2	17	W9A09COLE	668	30	23	1	1	RFD	81247	2.2836	mg/g	Yanco Hurricane 20/10	NA	NA	81247	NA	1	1		W9A09COLE_RFD	COLE
1223	HRZ06_0250	113350	2009	1003	5	2	19	W9A09COLE	232	26	70	2	3	IRR	81249	1.6426	mg/g	Yanco Hurricane 19/10	NA	NA	81249	NA	1	1		W9A09COLE_IRR	COLE
1224	HRZ03_0005	112480	2009	572	5	2	20	W9A09COLE	88	19	40	1	2	IRR	81250	1.4252	mg/g	Leeton Hurricane 20/10	NA	NA	81250	NA	1	1		W9A09COLE_IRR	COLE
1225	WW20680	116535	2009	2739	5	2	21	W9A09YANA	789	18	119	2	4	IRR	81251	1.4066	mg/g	Hurricane Dehydrator 13/10/09	NA	NA	81251	83118	1	2		W9A09YANA_IRR	YANA
1226	SUPER_SERI_1	114647	2009	1522	5	2	23	W9A09YANA	374	4	23	1	1	IRR	81253	1.7084	mg/g	Lucerne Dehydrator 13/10/09	NA	NA	81253	NA	1	1		W9A09YANA_IRR	YANA
1227	LPB03_1109	114713	2009	2224	5	2	24	W9A09YANA	282	4	89	2	3	RFD	81254	0.52191	mg/g	Lucerne Dehydrator 5/10 - 13/10	NA	NA	81254	NA	1	1		W9A09YANA_RFD	YANA
1228	WW19932	114541	2009	1857	5	2	25	W9A09YANA	747	3	45	1	2	RFD	81255	1.7747	mg/g	Lucerne Dehydrator 5/10 - 13/10	NA	NA	81255	82877	1	2		W9A09YANA_RFD	YANA
1229	HRZ04_0231	115486	2009	2298	5	2	26	W9A09YANA	131	10	94	2	3	RFD	81256	1.6432	mg/g	Lucerne Dehydrator 5/10 - 13/10	NA	NA	81256	NA	1	1		W9A09YANA_RFD	YANA
1230	WW20667	115423	2009	1606	5	2	27	W9A09YANA	787	10	31	1	1	IRR	81257	1.7568	mg/g	Lucerne Dehydrator 13/10/09	NA	NA	81257	NA	1	1	mmat	W9A09YANA_IRR	YANA
1231	HRZ06_0034	111001	2009	71	5	2	28	W9A09COLE	193	7	1	1	1	RFD	81258	2.1974	mg/g	Lucerne Dehydrator 20/10	NA	NA	81258	NA	1	1		W9A09COLE_RFD	COLE
1232	WW19473	114193	2009	1087	5	2	29	W9A09COLE	703	33	73	2	3	IRR	81259	1.3723	mg/g	Yanco Hurricane 19/10	NA	NA	81259	NA	1	1		W9A09COLE_IRR	COLE
1233	HRZ04_0227	111797	2009	871	5	2	30	W9A09COLE	130	13	77	2	3	IRR	81260	1.8915	mg/g	Lucerne Dehydrator 19/10	NA	NA	81260	NA	1	1		W9A09COLE_IRR	COLE
1234	PEAKE	113676	2009	686	5	3	1	W9A09COLE	302	29	36	1	2	IRR	81261	1.6918	mg/g	Leeton Hurricane 20/10	NA	NA	81261	NA	1	1		W9A09COLE_IRR	COLE
1235	WW18946	114200	2009	1090	5	3	2	W9A09COLE	687	33	80	2	3	IRR	81262	2.2657	mg/g	Yanco Hurricane 19/10	NA	NA	81262	NA	1	1		W9A09COLE_IRR	COLE
1236	RAC1451	112327	2009	189	5	3	3	W9A09COLE	335	18	7	1	1	RFD	81263	2.2814	mg/g	Yanco Hurricane 22/10	NA	NA	81263	NA	1	1		W9A09COLE_RFD	COLE
1237	WW19987	111630	2009	135	5	3	4	W9A09COLE	752	12	30	1	1	RFD	81264	2.2567	mg/g	Lucerne Dehydrator 20/10	NA	NA	81264	NA	1	1		W9A09COLE_RFD	COLE
1238	WW19866	112537	2009	1299	5	3	5	W9A09COLE	742	19	97	2	4	RFD	81265	1.1567	mg/g	Lucerne Dehydrator 19/10	NA	NA	81265	82997	1	2		W9A09COLE_RFD	COLE
1239	HRZ04_0157	110842	2009	781	5	3	6	W9A09COLE	118	5	82	2	3	IRR	81266	1.8854	mg/g	Lucerne Dehydrator 19/10	NA	NA	81266	NA	1	1		W9A09COLE_IRR	COLE
1240	WW19565	113628	2009	1395	5	3	7	W9A09COLE	714	28	108	2	4	RFD	81267	1.7341	mg/g	Lucerne Dehydrator 19/10	NA	NA	81267	NA	1	1		W9A09COLE_RFD	COLE
1241	WW20484	112932	2009	239	5	3	8	W9A09COLE	769	23	12	1	1	RFD	81268	1.2717	mg/g	Yanco Hurricane 20/10	NA	NA	81268	NA	1	1		W9A09COLE_RFD	COLE
1242	VW2373	115156	2009	1576	5	3	9	W9A09YANA	468	8	20	1	1	IRR	81269	1.2527	mg/g	Lucerne Dehydrator 5/10 - 13/10	NA	NA	81269	NA	1	1		W9A09YANA_IRR	YANA
1243	SUN562A	115603	2009	2303	5	3	10	W9A09YANA	366	11	83	2	3	RFD	81270	1.414	mg/g	Lucerne Dehydrator 5/10 - 13/10	NA	NA	81270	82549	1	2		W9A09YANA_RFD	YANA
1244	VW2426	112635	2009	945	5	3	11	W9A09COLE	476	20	75	2	3	IRR	81271	1.3519	mg/g	Yanco Hurricane 19/10	NA	NA	81271	NA	1	1		W9A09COLE_IRR	COLE
1245	WW21859	117410	2009	2826	5	3	12	W9A09YANA	831	25	98	2	4	IRR	81272	1.6221	mg/g	Hurricane Dehydrator 13/10/09	NA	NA	81272	NA	1	1		W9A09YANA_IRR	YANA
1246	VW3457	111439	2009	838	5	3	13	W9A09COLE	496	10	79	2	3	IRR	81273	1.8481	mg/g	Lucerne Dehydrator 19/10	NA	NA	81273	83213	1	2		W9A09COLE_IRR	COLE
1247	SUNBRI	110423	2009	21	5	3	14	W9A09COLE	372	2	23	1	1	RFD	81274	2.717	mg/g	Yanco Hurricane 20/10	NA	NA	81274	NA	1	1		W9A09COLE_RFD	COLE
1248	HRZ04_0515	115370	2009	2625	5	3	15	W9A09YANA	154	9	106	2	4	IRR	81275	1.3875	mg/g	Hurricane Dehydrator 13/10/09	NA	NA	81275	NA	1	1		W9A09YANA_IRR	YANA
1249	HRZ04_0227	117563	2009	2854	5	3	16	W9A09YANA	130	26	123	2	4	IRR	81276	2.0817	mg/g	Hurricane Dehydrator 13/10/09	NA	NA	81276	NA	1	1		W9A09YANA_IRR	YANA
1250	QT13375	116286	2009	2712	5	3	17	W9A09YANA	315	16	126	2	4	IRR	81277	1.6435	mg/g	Hurricane Dehydrator 13/10/09	NA	NA	81277	NA	1	1		W9A09YANA_IRR	YANA
1251	WW14309	112210	2009	179	5	3	18	W9A09COLE	580	17	10	1	1	RFD	81278	2.0525	mg/g	Lucerne Dehydrator 20/10	NA	NA	81278	NA	1	1		W9A09COLE_RFD	COLE
1252	VT2474	116661	2009	2751	5	3	19	W9A09YANA	387	19	117	2	4	IRR	81279	1.7081	mg/g	Hurricane Dehydrator 13/10/09	NA	NA	81279	81757	1	2		W9A09YANA_IRR	YANA
1253	EGA_JAEGER	115850	2009	2324	5	3	20	W9A09YANA	63	13	74	2	3	RFD	81280	1.1512	mg/g	Lucerne Dehydrator 5/10 - 13/10	NA	NA	81280	NA	1	1		W9A09YANA_RFD	YANA
1254	VW3595	111701	2009	1215	5	3	21	W9A09COLE	503	12	101	2	4	RFD	81281	1.3521	mg/g	Lucerne Dehydrator 19/10	NA	NA	81281	NA	1	1		W9A09COLE_RFD	COLE
1255	LPB03_1109	117562	2009	2853	5	3	22	W9A09YANA	282	26	122	2	4	IRR	81282	1.5624	mg/g	Hurricane Dehydrator 13/10/09	NA	NA	81282	82276	1	2		W9A09YANA_IRR	YANA
1256	HRZ06_0265	115259	2009	2620	5	3	23	W9A09YANA	237	8	123	2	4	IRR	81283	1.5823	mg/g	Hurricane Dehydrator 13/10/09	NA	NA	81283	NA	1	1		W9A09YANA_IRR	YANA
1257	WW18925	114273	2009	1826	5	3	24	W9A09YANA	685	1	33	1	2	RFD	81284	1.3724	mg/g	Lucerne Dehydrator 5/10 - 13/10	NA	NA	81284	NA	1	1		W9A09YANA_RFD	YANA
1258	GBA0608	117390	2009	2472	5	3	25	W9A09YANA	73	25	78	2	3	RFD	81285	1.3391	mg/g	Lucerne Dehydrator then Leeton Farm 13/10/09	NA	NA	81285	NA	1	1		W9A09YANA_RFD	YANA
1259	VW0398	110969	2009	795	5	3	26	W9A09COLE	429	6	89	2	3	IRR	81286	1.3173	mg/g	Lucerne Dehydrator 19/10	NA	NA	81286	NA	1	1		W9A09COLE_IRR	COLE
1260	HRZ03_0061	114041	2009	711	5	3	27	W9A09COLE	97	32	41	1	2	IRR	81287	1.7901	mg/g	Leeton Hurricane 20/10	NA	NA	81287	NA	1	1		W9A09COLE_IRR	COLE
1261	WW20558	110861	2009	1143	5	3	28	W9A09COLE	774	5	101	2	4	RFD	81288	1.6208	mg/g	Lucerne Dehydrator 19/10	NA	NA	81288	82921	1	2		W9A09COLE_RFD	COLE
1262	VW3398	111162	2009	442	5	3	29	W9A09COLE	491	8	42	1	2	IRR	81289	1.5943	mg/g	Leeton Hurricane 20/10	NA	NA	81289	NA	1	1		W9A09COLE_IRR	COLE
1263	WW20672	112264	2009	910	5	3	30	W9A09COLE	788	17	64	2	3	IRR	81290	1.6413	mg/g	Lucerne Dehydrator 19/10	NA	NA	81290	NA	1	1		W9A09COLE_IRR	COLE
1264	HRZ06_0250	111370	2009	109	5	4	1	W9A09COLE	232	10	10	1	1	RFD	81291	2.0224	mg/g	Lucerne Dehydrator 20/10	NA	NA	81291	NA	1	1		W9A09COLE_RFD	COLE
1265	HRZ04_0227	110748	2009	1138	5	4	2	W9A09COLE	130	4	108	2	4	RFD	81292	1.0904	mg/g	Lucerne Dehydrator 19/10	NA	NA	81292	81752	1	2		W9A09COLE_RFD	COLE
1266	VW0990	117909	2009	2523	5	4	3	W9A09YANA	442	29	85	2	3	RFD	81293	1.0263	mg/g	Lucerne Dehydrator then Leeton Farm 13/10/09	NA	NA	81293	NA	1	1		W9A09YANA_RFD	YANA
1267	CURRAWONG	115826	2009	1989	5	4	4	W9A09YANA	55	13	50	1	2	RFD	81294	1.7898	mg/g	Lucerne Dehydrator 5/10 - 13/10	NA	NA	81294	NA	1	1		W9A09YANA_RFD	YANA
1268	HRZ06_0270	113337	2009	657	5	4	6	W9A09COLE	239	26	57	1	2	IRR	81296	1.4878	mg/g	Leeton Hurricane 20/10	NA	NA	81296	NA	1	1	emu damage	W9A09COLE_IRR	COLE
1269	VW0823	117472	2009	1777	5	4	7	W9A09YANA	439	26	32	1	1	IRR	81297	1.2995	mg/g	Lucerne Dehydrator 5/10 - 13/10	NA	NA	81297	NA	1	1		W9A09YANA_IRR	YANA
1270	VW0720	111169	2009	445	5	4	8	W9A09COLE	434	8	49	1	2	IRR	81298	1.5411	mg/g	Leeton Hurricane 20/10	NA	NA	81298	81847	1	2		W9A09COLE_IRR	COLE
1271	WW14072	116408	2009	2725	5	4	9	W9A09YANA	572	17	120	2	4	IRR	81299	1.4385	mg/g	Hurricane Dehydrator 13/10/09	NA	NA	81299	NA	1	1		W9A09YANA_IRR	YANA
1272	WW19410	114573	2009	2210	5	4	10	W9A09YANA	701	3	77	2	3	RFD	81300	1.3816	mg/g	Lucerne Dehydrator 5/10 - 13/10	NA	NA	81300	NA	1	1		W9A09YANA_RFD	YANA
1273	HRZ06_0055	116875	2009	2426	5	4	11	W9A09YANA	206	21	75	2	3	RFD	81301	1.6853	mg/g	Lucerne Dehydrator 5/10 - 13/10	NA	NA	81301	NA	1	1		W9A09YANA_RFD	YANA
1274	WW19490	110432	2009	379	5	4	12	W9A09COLE	704	2	32	1	2	IRR	81302	2.2336	mg/g	Leeton Hurricane 20/10	NA	NA	81302	NA	1	1		W9A09COLE_IRR	COLE
1275	VW0644	113587	2009	1027	5	4	13	W9A09COLE	433	28	67	2	3	IRR	81303	1.6393	mg/g	Yanco Hurricane 19/10	NA	NA	81303	NA	1	1		W9A09COLE_IRR	COLE
1276	VW2311	114055	2009	715	5	4	14	W9A09COLE	465	32	55	1	2	IRR	81304	1.3878	mg/g	Leeton Hurricane 20/10	NA	NA	81304	82892	1	2		W9A09COLE_IRR	COLE
1277	WW3028_4	110510	2009	1111	5	4	15	W9A09COLE	834	2	110	2	4	RFD	81305	1.0228	mg/g	Lucerne Dehydrator 19/10	NA	NA	81305	NA	1	1		W9A09COLE_RFD	COLE
1278	WW20406	114143	2009	360	5	4	16	W9A09COLE	767	33	23	1	1	RFD	81306	2.144	mg/g	CSU Dehydrator	NA	NA	81306	NA	1	1		W9A09COLE_RFD	COLE
1279	SUN534D	116409	2009	2726	5	4	17	W9A09YANA	359	17	121	2	4	IRR	81307	1.7998	mg/g	Hurricane Dehydrator 13/10/09	NA	NA	81307	NA	1	1		W9A09YANA_IRR	YANA
1280	VW3473	117396	2009	2475	5	4	18	W9A09YANA	500	25	84	2	3	RFD	81308	1.2374	mg/g	Lucerne Dehydrator then Leeton Farm 13/10/09	NA	NA	81308	NA	1	1		W9A09YANA_RFD	YANA
1281	VV2321	113562	2009	675	5	4	19	W9A09COLE	406	28	42	1	2	IRR	81309	2.1904	mg/g	Leeton Hurricane 20/10	NA	NA	81309	NA	1	1		W9A09COLE_IRR	COLE
1282	WW19492	114081	2009	1079	5	4	20	W9A09COLE	705	32	81	2	3	IRR	81310	1.9513	mg/g	Yanco Hurricane 19/10	NA	NA	81310	81976	1	2		W9A09COLE_IRR	COLE
1283	ATTILA	110818	2009	412	5	4	21	W9A09COLE	25	5	58	1	2	IRR	81311	1.9936	mg/g	Leeton Hurricane 20/10	NA	NA	81311	NA	1	1		W9A09COLE_IRR	COLE
1284	B1272T	115506	2009	2640	5	4	22	W9A09YANA	44	10	114	2	4	IRR	81312	1.8887	mg/g	Hurricane Dehydrator 13/10/09	NA	NA	81312	NA	1	1		W9A09YANA_IRR	YANA
1285	WW13773	116725	2009	2064	5	4	23	W9A09YANA	570	20	53	1	2	RFD	81313	1.5548	mg/g	Lucerne Dehydrator 5/10 - 13/10	NA	NA	81313	NA	1	1		W9A09YANA_RFD	YANA
1286	HRZ03_0005	114510	2009	1499	5	4	24	W9A09YANA	88	3	14	1	1	IRR	81314	1.7301	mg/g	Lucerne Dehydrator 5/10 - 13/10	NA	NA	81314	82570	1	2		W9A09YANA_IRR	YANA
1287	VW0990	113281	2009	271	5	4	25	W9A09COLE	442	26	1	1	1	RFD	81315	2.0775	mg/g	Yanco Hurricane 20/10	NA	NA	81315	NA	1	1		W9A09COLE_RFD	COLE
1288	WW20672	114652	2009	1525	5	4	26	W9A09YANA	788	4	28	1	1	IRR	81316	1.3964	mg/g	Lucerne Dehydrator 13/10/09	NA	NA	81316	NA	1	1		W9A09YANA_IRR	YANA
1289	CATALINA	117894	2009	2519	5	4	27	W9A09YANA	51	29	70	2	3	RFD	81317	1.3058	mg/g	Lucerne Dehydrator then Leeton Farm 13/10/09	NA	NA	81317	NA	1	1		W9A09YANA_RFD	YANA
1290	HRZ05_0245	115736	2009	2316	5	4	28	W9A09YANA	188	12	88	2	3	RFD	81318	0.65848	mg/g	Lucerne Dehydrator 5/10 - 13/10	NA	NA	81318	NA	1	1		W9A09YANA_RFD	YANA
1291	HRZ04_0511	115839	2009	1995	5	4	29	W9A09YANA	151	13	63	1	2	RFD	81319	0.8944	mg/g	Hurricane Dehydrator 13/10/09	NA	NA	81319	83224	1	2		W9A09YANA_RFD	YANA
1292	8890_213	114016	2009	348	5	4	30	W9A09COLE	21	32	16	1	1	RFD	81320	1.872	mg/g	Yanco Hurricane 20/10	NA	NA	81320	NA	1	1		W9A09COLE_RFD	COLE
1293	VW0398	115549	2009	1621	5	5	1	W9A09YANA	429	11	29	1	1	IRR	81321	1.1009	mg/g	Hurricane Dehydrator 13/10/09	NA	NA	81321	NA	1	1		W9A09YANA_IRR	YANA
1294	WW13602	115546	2009	1620	5	5	2	W9A09YANA	566	11	26	1	1	IRR	81322	1.63	mg/g	Lucerne Dehydrator 5/10 - 13/10	NA	NA	81322	NA	1	1		W9A09YANA_IRR	YANA
1295	HRZ05_0130	111609	2009	124	5	5	3	W9A09COLE	170	12	9	1	1	RFD	81323	2.491	mg/g	Lucerne Dehydrator 20/10	NA	NA	81323	81769	1	2		W9A09COLE_RFD	COLE
1296	VW2067	114340	2009	2557	5	5	4	W9A09YANA	462	1	100	2	4	IRR	81324	1.8653	mg/g	Hurricane Dehydrator 13/10/09	NA	NA	81324	NA	1	1		W9A09YANA_IRR	YANA
1297	LANG	112308	2009	1278	5	5	5	W9A09COLE	279	17	108	2	4	RFD	81325	1.2316	mg/g	Lucerne Dehydrator 19/10	NA	NA	81325	NA	1	1		W9A09COLE_RFD	COLE
1298	HRZ04_0231	116160	2009	2700	5	5	6	W9A09YANA	131	15	128	2	4	IRR	81326	1.8466	mg/g	Hurricane Dehydrator 13/10/09	NA	NA	81326	NA	1	1		W9A09YANA_IRR	YANA
1299	90670_91	115514	2009	2645	5	5	7	W9A09YANA	22	10	122	2	4	IRR	81327	1.4039	mg/g	Hurricane Dehydrator 13/10/09	NA	NA	81327	82429	1	2		W9A09YANA_IRR	YANA
1300	WW18791	114460	2009	2205	5	5	8	W9A09YANA	671	2	92	2	3	RFD	81328	1.0939	mg/g	Lucerne Dehydrator 5/10 - 13/10	NA	NA	81328	NA	1	1		W9A09YANA_RFD	YANA
1301	WW21859	112115	2009	536	5	5	9	W9A09COLE	831	16	35	1	2	IRR	81329	1.5808	mg/g	Leeton Hurricane 20/10	NA	NA	81329	NA	1	1		W9A09COLE_IRR	COLE
1302	334609_1	117765	2009	2502	5	5	10	W9A09YANA	9	28	69	2	3	RFD	81330	1.0003	mg/g	Lucerne Dehydrator then Leeton Farm 13/10/09	NA	NA	81330	NA	1	1		W9A09YANA_RFD	YANA
1303	9329_13	113743	2009	1408	5	5	11	W9A09COLE	23	29	103	2	4	RFD	81331	2.6978	mg/g	Lucerne Dehydrator 19/10	NA	NA	81331	NA	1	1		W9A09COLE_RFD	COLE
1304	VW3717	113734	2009	1403	5	5	12	W9A09COLE	509	29	94	2	4	RFD	81332	1.5371	mg/g	Lucerne Dehydrator 19/10	NA	NA	81332	81794	1	2		W9A09COLE_RFD	COLE
1305	WW18957	113882	2009	329	5	5	13	W9A09COLE	689	31	2	1	1	RFD	81333	2.0316	mg/g	Yanco Hurricane 20/10	NA	NA	81333	NA	1	1		W9A09COLE_RFD	COLE
1306	VW0857	112825	2009	230	5	5	14	W9A09COLE	440	22	25	1	1	RFD	81334	1.5203	mg/g	Yanco Hurricane 20/10	NA	NA	81334	NA	1	1		W9A09COLE_RFD	COLE
1307	VT1155	114709	2009	2222	5	5	15	W9A09YANA	384	4	85	2	3	RFD	81335	1.1482	mg/g	Lucerne Dehydrator 5/10 - 13/10	NA	NA	81335	NA	1	1		W9A09YANA_RFD	YANA
1308	VW0222	117861	2009	2158	5	5	16	W9A09YANA	418	29	37	1	2	RFD	81336	1.4042	mg/g	Lucerne Dehydrator 5/10 - 13/10	NA	NA	81336	NA	1	1		W9A09YANA_RFD	YANA
1309	WW18830	115360	2009	2288	5	5	17	W9A09YANA	677	9	96	2	3	RFD	81337	1.2349	mg/g	Lucerne Dehydrator 5/10 - 13/10	NA	NA	81337	82727	1	2		W9A09YANA_RFD	YANA
1310	WW21842	110435	2009	381	5	5	18	W9A09COLE	829	2	35	1	2	IRR	81338	1.6523	mg/g	Leeton Hurricane 20/10	NA	NA	81338	NA	1	1		W9A09COLE_IRR	COLE
1311	WW14396	116055	2009	1678	5	5	21	W9A09YANA	583	15	23	1	1	IRR	81341	0.93461	mg/g	Lucerne Dehydrator 13/10/09	NA	NA	81341	NA	1	1		W9A09YANA_IRR	YANA
1312	65211_176	115766	2009	2665	5	5	22	W9A09YANA	12	12	118	2	4	IRR	81342	2.046	mg/g	Hurricane Dehydrator 13/10/09	NA	NA	81342	NA	1	1		W9A09YANA_IRR	YANA
1313	RAC1502	110663	2009	48	5	5	23	W9A09COLE	342	4	23	1	1	RFD	81343	1.7558	mg/g	Lucerne Dehydrator 20/10	NA	NA	81343	83050	1	2		W9A09COLE_RFD	COLE
1314	LPB04_2351	110737	2009	1131	5	5	24	W9A09COLE	288	4	97	2	4	RFD	81344	2.1165	mg/g	Lucerne Dehydrator 19/10	NA	NA	81344	NA	1	1		W9A09COLE_RFD	COLE
1315	9329_13	114715	2009	2225	5	5	25	W9A09YANA	23	4	91	2	3	RFD	81345	1.1087	mg/g	Lucerne Dehydrator 5/10 - 13/10	NA	NA	81345	NA	1	1		W9A09YANA_RFD	YANA
1316	VW2324	110991	2009	1161	5	5	26	W9A09COLE	467	6	111	2	4	RFD	81346	1.1046	mg/g	Lucerne Dehydrator 19/10	NA	NA	81346	82290	1	2		W9A09COLE_RFD	COLE
1317	VW2843	111029	2009	83	5	5	27	W9A09COLE	483	7	29	1	1	RFD	81347	1.9112	mg/g	Lucerne Dehydrator 20/10	NA	NA	81347	NA	1	1		W9A09COLE_RFD	COLE
1318	VW4326	114393	2009	1486	5	5	29	W9A09YANA	519	2	25	1	1	IRR	81349	1.0998	mg/g	Lucerne Dehydrator 13/10/09	NA	NA	81349	NA	1	1		W9A09YANA_IRR	YANA
1319	WW19365	112006	2009	530	5	5	30	W9A09COLE	700	15	46	1	2	IRR	81350	1.7874	mg/g	Leeton Hurricane 20/10	NA	NA	81350	81815	1	2		W9A09COLE_IRR	COLE
1320	WAGT022	113586	2009	1026	5	6	1	W9A09COLE	525	28	66	2	3	IRR	81351	2.4177	mg/g	Yanco Hurricane 19/10	NA	NA	81351	82133	1	2		W9A09COLE_IRR	COLE
1321	HRZ06_0145	113884	2009	331	5	6	2	W9A09COLE	223	31	4	1	1	RFD	81352	2.2073	mg/g	Yanco Hurricane 20/10	NA	NA	81352	NA	1	1		W9A09COLE_RFD	COLE
1322	WW19562	115257	2009	2618	5	6	3	W9A09YANA	712	8	121	2	4	IRR	81353	1.5836	mg/g	Hurricane Dehydrator 13/10/09	NA	NA	81353	NA	1	1		W9A09YANA_IRR	YANA
1323	VT1308	113852	2009	1419	5	6	4	W9A09COLE	386	30	92	2	4	RFD	81354	1.8002	mg/g	Lucerne Dehydrator 19/10	NA	NA	81354	NA	1	1		W9A09COLE_RFD	COLE
1324	HRZ06_0143	113989	2009	1434	5	6	5	W9A09COLE	222	31	109	2	4	RFD	81355	1.2284	mg/g	Lucerne Dehydrator 19/10	NA	NA	81355	NA	1	1		W9A09COLE_RFD	COLE
1325	HRZ06_0514	117152	2009	2454	5	6	6	W9A09YANA	257	23	96	2	3	RFD	81356	1.19	mg/g	Lucerne Dehydrator 5/10 - 13/10	NA	NA	80887	81356	1	2		W9A09YANA_RFD	YANA
1326	VW0385	112028	2009	889	5	6	7	W9A09COLE	426	15	68	2	3	IRR	81357	1.476	mg/g	Lucerne Dehydrator 19/10	NA	NA	81357	NA	1	1		W9A09COLE_IRR	COLE
1327	WW20140	113484	2009	1022	5	6	8	W9A09COLE	755	27	84	2	3	IRR	81358	2.1038	mg/g	Yanco Hurricane 19/10	NA	NA	81358	NA	1	1		W9A09COLE_IRR	COLE
1328	WW18919	117612	2009	2138	5	6	9	W9A09YANA	682	27	44	1	2	RFD	81359	0.88748	mg/g	Lucerne Dehydrator 5/10 - 13/10	NA	NA	81359	NA	1	1		W9A09YANA_RFD	YANA
1329	HRZ04_0161	110762	2009	53	5	6	10	W9A09COLE	119	5	2	1	1	RFD	81360	2.0271	mg/g	Yanco Hurricane 20/10	NA	NA	81360	NA	1	1		W9A09COLE_RFD	COLE
1330	WW14314	113311	2009	647	5	6	11	W9A09COLE	582	26	31	1	2	IRR	81361	1.5628	mg/g	Leeton Hurricane 20/10	NA	NA	81361	82745	1	2		W9A09COLE_IRR	COLE
1331	VW3707	113590	2009	1028	5	6	12	W9A09COLE	505	28	70	2	3	IRR	81362	1.7196	mg/g	Yanco Hurricane 19/10	NA	NA	81362	NA	1	1		W9A09COLE_IRR	COLE
1332	8890_213	118063	2009	2902	5	6	13	W9A09YANA	21	30	111	2	4	IRR	81363	1.9926	mg/g	Hurricane Dehydrator 13/10/09	NA	NA	81363	NA	1	1		W9A09YANA_IRR	YANA
1333	WW16259	115960	2009	2003	5	6	14	W9A09YANA	603	14	56	1	2	RFD	81364	1.1811	mg/g	Lucerne Dehydrator then Leeton Farm 13/10/09	NA	NA	81364	NA	1	1		W9A09YANA_RFD	YANA
1334	EGA_GREGORY	115710	2009	1980	5	6	15	W9A09YANA	62	12	62	1	2	RFD	81365	1.3514	mg/g	Lucerne Dehydrator 5/10 - 13/10	NA	NA	81365	82020	1	2		W9A09YANA_RFD	YANA
1335	9329_13	118123	2009	2184	5	6	16	W9A09YANA	23	31	43	1	2	RFD	81366	1.7205	mg/g	Lucerne Dehydrator 5/10 - 13/10	NA	NA	81366	NA	1	1		W9A09YANA_RFD	YANA
1336	GLADIUS	113192	2009	634	5	6	17	W9A09COLE	77	25	32	1	2	IRR	81367	1.69	mg/g	Leeton Hurricane 20/10	NA	NA	81367	NA	1	1		W9A09COLE_IRR	COLE
1337	HRZ06_0034	117245	2009	2108	5	6	18	W9A09YANA	193	24	61	1	2	RFD	81368	1.0134	mg/g	Lucerne Dehydrator 5/10 - 13/10	NA	NA	81368	82480	1	2		W9A09YANA_RFD	YANA
1338	VW0760	118148	2009	2545	5	6	19	W9A09YANA	436	31	68	2	3	RFD	81369	1.0118	mg/g	Lucerne Dehydrator 5/10 - 13/10	NA	NA	81369	NA	1	1		W9A09YANA_RFD	YANA
1339	WW18569	113001	2009	976	5	6	20	W9A09COLE	664	23	81	2	3	IRR	81370	1.9268	mg/g	Yanco Hurricane 19/10	NA	NA	81370	NA	1	1		W9A09COLE_IRR	COLE
1340	WW19410	117054	2009	2801	5	6	21	W9A09YANA	701	22	126	2	4	IRR	81371	1.4638	mg/g	Hurricane Dehydrator 13/10/09	NA	NA	81371	NA	1	1		W9A09YANA_IRR	YANA
1341	VW4368	114532	2009	1852	5	6	22	W9A09YANA	521	3	36	1	2	RFD	81372	1.7077	mg/g	Lucerne Dehydrator then Leeton Farm 13/10/09	NA	NA	81372	82378	1	2		W9A09YANA_RFD	YANA
1342	HRZ05_0132	115215	2009	2270	5	6	23	W9A09YANA	172	8	79	2	3	RFD	81373	1.7337	mg/g	Lucerne Dehydrator 5/10 - 13/10	NA	NA	81373	NA	1	1		W9A09YANA_RFD	YANA
1343	WW19716	116346	2009	2033	5	6	24	W9A09YANA	733	17	58	1	2	RFD	81374	1.7155	mg/g	Lucerne Dehydrator 5/10 - 13/10	NA	NA	81374	NA	1	1		W9A09YANA_RFD	YANA
1344	WAGT022	114681	2009	1873	5	6	25	W9A09YANA	525	4	57	1	2	RFD	81375	1.6457	mg/g	Lucerne Dehydrator then Leeton Farm 13/10/09	NA	NA	81375	NA	1	1		W9A09YANA_RFD	YANA
1345	VW0404	117430	2009	2834	5	6	26	W9A09YANA	432	25	118	2	4	IRR	81376	1.3582	mg/g	Hurricane Dehydrator 13/10/09	NA	NA	81376	NA	1	1		W9A09YANA_IRR	YANA
1346	PASTOR	117919	2009	2528	5	6	27	W9A09YANA	300	29	95	2	3	RFD	81377	1.3655	mg/g	Lucerne Dehydrator 5/10 - 13/10	NA	NA	81377	NA	1	1		W9A09YANA_RFD	YANA
1347	WW19662	116739	2009	2413	5	6	28	W9A09YANA	726	20	67	2	3	RFD	81378	1.0255	mg/g	Lucerne Dehydrator then Leeton Farm 13/10/09	NA	NA	81378	83105	1	2		W9A09YANA_RFD	YANA
1348	HRZ04_0161	112897	2009	1340	5	6	29	W9A09COLE	119	22	97	2	4	RFD	81379	1.4929	mg/g	Lucerne Dehydrator 19/10	NA	NA	81379	NA	1	1		W9A09COLE_RFD	COLE
1349	HRZ06_0055	111622	2009	129	5	6	30	W9A09COLE	206	12	22	1	1	RFD	81380	2.0585	mg/g	Yanco Hurricane 20/10	NA	NA	81380	NA	1	1		W9A09COLE_RFD	COLE
1350	WW19561	113568	2009	678	5	7	1	W9A09COLE	711	28	48	1	2	IRR	81381	1.8121	mg/g	Leeton Hurricane 20/10	NA	NA	81381	NA	1	1		W9A09COLE_IRR	COLE
1351	HRZ03_0061	115495	2009	2637	5	7	2	W9A09YANA	97	10	103	2	4	IRR	81382	1.4672	mg/g	Hurricane Dehydrator 13/10/09	NA	NA	81382	NA	1	1		W9A09YANA_IRR	YANA
1352	HRZ06_0514	114783	2009	1537	5	7	3	W9A09YANA	257	5	31	1	1	IRR	81383	1.7912	mg/g	Lucerne Dehydrator 5/10 - 13/10	NA	NA	81383	NA	1	1		W9A09YANA_IRR	YANA
1353	VW2373	117024	2009	2440	5	7	4	W9A09YANA	468	22	96	2	3	RFD	81384	0.95275	mg/g	Lucerne Dehydrator 5/10 - 13/10	NA	NA	81384	82037	1	2		W9A09YANA_RFD	YANA
1354	VW0990	117216	2009	1760	5	7	5	W9A09YANA	442	24	32	1	1	IRR	81385	1.5588	mg/g	Lucerne Dehydrator 5/10 - 13/10	NA	NA	81385	NA	1	1		W9A09YANA_IRR	YANA
1355	RAC1418	113794	2009	695	5	7	6	W9A09COLE	330	30	34	1	2	IRR	81386	1.9269	mg/g	Leeton Hurricane 20/10	NA	NA	81386	NA	1	1		W9A09COLE_IRR	COLE
1356	WW19562	112578	2009	211	5	7	7	W9A09COLE	712	20	18	1	1	RFD	81387	2.0115	mg/g	Yanco Hurricane 20/10	NA	NA	81387	NA	1	1		W9A09COLE_RFD	COLE
1357	HRZ05_0224	112477	2009	571	5	7	8	W9A09COLE	187	19	37	1	2	IRR	81388	1.5509	mg/g	Leeton Hurricane 20/10	NA	NA	81388	NA	1	1		W9A09COLE_IRR	COLE
1358	HRZ03_0061	115025	2009	1560	5	7	9	W9A09YANA	97	7	17	1	1	IRR	81389	1.5094	mg/g	Lucerne Dehydrator 5/10 - 13/10	NA	NA	81389	81924	1	2		W9A09YANA_IRR	YANA
1359	VW4076	117464	2009	1771	5	7	10	W9A09YANA	517	26	24	1	1	IRR	81390	0.52386	mg/g	Hurricane Dehydrator 13/10/09	NA	NA	81390	NA	1	1		W9A09YANA_IRR	YANA
1360	WW20667	112937	2009	242	5	7	11	W9A09COLE	787	23	17	1	1	RFD	81391	1.8685	mg/g	Yanco Hurricane 20/10	NA	NA	81391	NA	1	1		W9A09COLE_RFD	COLE
1361	HRZ06_0250	114685	2009	1875	5	7	12	W9A09YANA	232	4	61	1	2	RFD	81392	1.0859	mg/g	Lucerne Dehydrator 5/10 - 13/10	NA	NA	81392	NA	1	1		W9A09YANA_RFD	YANA
1362	WW13735	117029	2009	2789	5	7	13	W9A09YANA	568	22	101	2	4	IRR	81393	2.0044	mg/g	Hurricane Dehydrator 13/10/09	NA	NA	81393	NA	1	1		W9A09YANA_IRR	YANA
1363	PASTOR	110900	2009	69	5	7	14	W9A09COLE	300	6	20	1	1	RFD	81394	1.5201	mg/g	Lucerne Dehydrator 20/10	NA	NA	81394	82071	1	2		W9A09COLE_RFD	COLE
1364	WW21873	117395	2009	2474	5	7	15	W9A09YANA	832	25	83	2	3	RFD	81395	0.87797	mg/g	Lucerne Dehydrator then Leeton Farm 13/10/09	NA	NA	81395	NA	1	1		W9A09YANA_RFD	YANA
1365	WW19826	117930	2009	2879	5	7	16	W9A09YANA	740	29	106	2	4	IRR	81396	1.5671	mg/g	Hurricane Dehydrator 13/10/09	NA	NA	81396	NA	1	1		W9A09YANA_IRR	YANA
1366	HRZ06_2087	115141	2009	1570	5	7	17	W9A09YANA	266	8	5	1	1	IRR	81397	1.4933	mg/g	Lucerne Dehydrator 5/10 - 13/10	NA	NA	81397	NA	1	1		W9A09YANA_IRR	YANA
1367	HRZ06_0065	116120	2009	2359	5	7	18	W9A09YANA	211	15	88	2	3	RFD	81398	0.5568	mg/g	Lucerne Dehydrator then Leeton Farm 13/10/09	NA	NA	81398	NA	1	1		W9A09YANA_RFD	YANA
1368	QT13626	113859	2009	1422	5	7	19	W9A09COLE	320	30	99	2	4	RFD	81399	2.1021	mg/g	Lucerne Dehydrator 19/10	NA	NA	81399	82309	1	2		W9A09COLE_RFD	COLE
1369	CHARA	114641	2009	1517	5	7	20	W9A09YANA	52	4	17	1	1	IRR	81400	1.2458	mg/g	Lucerne Dehydrator 13/10/09	NA	NA	81400	NA	1	1		W9A09YANA_IRR	YANA
1370	HRZ04_0511	114320	2009	2197	5	7	21	W9A09YANA	151	1	80	2	3	RFD	81401	0.67333	mg/g	Lucerne Dehydrator 5/10 - 13/10	NA	NA	81401	NA	1	1		W9A09YANA_RFD	YANA
1371	PAVON_DWARF	116315	2009	1700	5	7	22	W9A09YANA	301	17	27	1	1	IRR	81402	1.3638	mg/g	Lucerne Dehydrator 5/10 - 13/10	NA	NA	81402	NA	1	1		W9A09YANA_IRR	YANA
1372	SUN571B	114886	2009	1541	5	7	23	W9A09YANA	369	6	6	1	1	IRR	81403	1.5765	mg/g	Lucerne Dehydrator 5/10 - 13/10	NA	NA	81403	NA	1	1		W9A09YANA_IRR	YANA
1373	WW18827	115116	2009	2609	5	7	24	W9A09YANA	674	7	108	2	4	IRR	81404	1.907	mg/g	Hurricane Dehydrator 13/10/09	NA	NA	81404	82431	1	2		W9A09YANA_IRR	YANA
1374	WAWHT3016	114271	2009	1475	5	7	25	W9A09YANA	545	1	31	1	1	IRR	81405	1.8626	mg/g	Lucerne Dehydrator 13/10/09	NA	NA	81405	NA	1	1	30% plot double fert	W9A09YANA_IRR	YANA
1375	VW1190	117768	2009	2503	5	7	26	W9A09YANA	447	28	72	2	3	RFD	81406	1.3152	mg/g	Lucerne Dehydrator then Leeton Farm 13/10/09	NA	NA	81406	NA	1	1		W9A09YANA_RFD	YANA
1376	VW3170	117202	2009	1757	5	7	27	W9A09YANA	486	24	18	1	1	IRR	81407	1.1247	mg/g	Lucerne Dehydrator 5/10 - 13/10	NA	NA	81407	83207	1	2		W9A09YANA_IRR	YANA
1377	VW2092	111275	2009	453	5	7	28	W9A09COLE	463	9	35	1	2	IRR	81408	2.1956	mg/g	Leeton Hurricane 20/10	NA	NA	81408	NA	1	1		W9A09COLE_IRR	COLE
1378	WAGT025	113987	2009	1433	5	7	29	W9A09COLE	527	31	107	2	4	RFD	81409	2.2105	mg/g	Lucerne Dehydrator 19/10	NA	NA	81409	NA	1	1		W9A09COLE_RFD	COLE
1379	VW4076	111670	2009	857	5	7	30	W9A09COLE	517	12	70	2	3	IRR	81410	1.2449	mg/g	Lucerne Dehydrator 19/10	NA	NA	81410	NA	1	1		W9A09COLE_IRR	COLE
1380	LPB03_1109	112647	2009	948	5	8	1	W9A09COLE	282	20	87	2	3	IRR	81411	1.3898	mg/g	Yanco Hurricane 19/10	NA	NA	81411	NA	1	1		W9A09COLE_IRR	COLE
1381	HRZ04_0206	114213	2009	1453	5	8	2	W9A09COLE	128	33	93	2	4	RFD	81412	1.091	mg/g	Lucerne Dehydrator 19/10	NA	NA	81412	NA	1	1		W9A09COLE_RFD	COLE
1382	HRZ06_0053	116215	2009	2021	5	8	3	W9A09YANA	205	16	55	1	2	RFD	81413	1.5306	mg/g	Lucerne Dehydrator 5/10 - 13/10	NA	NA	81413	82616	1	2		W9A09YANA_RFD	YANA
1383	EGA_STAMPEDE	117613	2009	2139	5	8	4	W9A09YANA	64	27	45	1	2	RFD	81414	1.2779	mg/g	Lucerne Dehydrator 5/10 - 13/10	NA	NA	81414	NA	1	1		W9A09YANA_RFD	YANA
1384	WW19548	111413	2009	472	5	8	5	W9A09COLE	710	10	53	1	2	IRR	81415	1.4259	mg/g	Leeton Hurricane 20/10	NA	NA	81415	NA	1	1		W9A09COLE_IRR	COLE
1385	VU3750	113294	2009	277	5	8	6	W9A09COLE	393	26	14	1	1	RFD	81416	1.4048	mg/g	Yanco Hurricane 20/10	NA	NA	81416	NA	1	1		W9A09COLE_RFD	COLE
1386	HRZ03_0062	113347	2009	1001	5	8	7	W9A09COLE	98	26	67	2	3	IRR	81417	1.1008	mg/g	Yanco Hurricane 19/10	NA	NA	81417	NA	1	1		W9A09COLE_IRR	COLE
1387	SUNVALE	117902	2009	2521	5	8	8	W9A09YANA	373	29	78	2	3	RFD	81418	1.1611	mg/g	Lucerne Dehydrator then Leeton Farm 13/10/09	NA	NA	81418	82983	1	2		W9A09YANA_RFD	YANA
1388	VW2847	114526	2009	1507	5	8	9	W9A09YANA	484	3	30	1	1	IRR	81419	1.3996	mg/g	Lucerne Dehydrator 13/10/09	NA	NA	81419	NA	1	1		W9A09YANA_IRR	YANA
1389	WAWHT3016	115741	2009	2319	5	8	10	W9A09YANA	545	12	93	2	3	RFD	81420	1.3163	mg/g	Lucerne Dehydrator 5/10 - 13/10	NA	NA	81420	NA	1	1		W9A09YANA_RFD	YANA
1390	VW1193	114716	2009	2226	5	8	11	W9A09YANA	449	4	92	2	3	RFD	81421	0.81957	mg/g	Lucerne Dehydrator 5/10 - 13/10	NA	NA	81421	NA	1	1		W9A09YANA_RFD	YANA
1391	VT1155	116322	2009	2026	5	8	12	W9A09YANA	384	17	34	1	2	RFD	81422	1.3569	mg/g	Lucerne Dehydrator 5/10 - 13/10	NA	NA	81422	82368	1	2		W9A09YANA_RFD	YANA
1392	WW18919	110569	2009	393	5	8	13	W9A09COLE	682	3	49	1	2	IRR	81423	1.6246	mg/g	Leeton Hurricane 20/10	NA	NA	81423	NA	1	1		W9A09COLE_IRR	COLE
1393	WW16367	116897	2009	2772	5	8	14	W9A09YANA	604	21	97	2	4	IRR	81424	1.1868	mg/g	Hurricane Dehydrator 13/10/09	NA	NA	81424	NA	1	1		W9A09YANA_IRR	YANA
1394	HRZ06_0319	112190	2009	1267	5	8	15	W9A09COLE	246	16	110	2	4	RFD	81425	1.5214	mg/g	Lucerne Dehydrator 19/10	NA	NA	81425	NA	1	1		W9A09COLE_RFD	COLE
1395	VW2092	117608	2009	2137	5	8	16	W9A09YANA	463	27	40	1	2	RFD	81426	1.2936	mg/g	Lucerne Dehydrator then Leeton Farm 13/10/09	NA	NA	81426	82148	1	2		W9A09YANA_RFD	YANA
1396	VW0385	117143	2009	2451	5	8	17	W9A09YANA	426	23	87	2	3	RFD	81427	1.3394	mg/g	Lucerne Dehydrator 5/10 - 13/10	NA	NA	81427	NA	1	1		W9A09YANA_RFD	YANA
1397	HRZ04_0511	114616	2009	2580	5	8	18	W9A09YANA	151	3	120	2	4	IRR	81428	1.5189	mg/g	Hurricane Dehydrator 13/10/09	NA	NA	81428	NA	1	1		W9A09YANA_IRR	YANA
1398	QT13359	114749	2009	2590	5	8	19	W9A09YANA	313	4	125	2	4	IRR	81429	1.7597	mg/g	Hurricane Dehydrator 13/10/09	NA	NA	81429	NA	1	1		W9A09YANA_IRR	YANA
1399	LPB03_1109	115919	2009	1661	5	8	20	W9A09YANA	282	14	15	1	1	IRR	81430	1.5878	mg/g	Hurricane Dehydrator 13/10/09	NA	NA	81430	NA	1	1		W9A09YANA_IRR	YANA
1400	EGA_WEDGETAIL	114314	2009	2196	5	8	21	W9A09YANA	65	1	74	2	3	RFD	81431	2.0142	mg/g	Lucerne Dehydrator 5/10 - 13/10	NA	NA	81431	NA	1	1		W9A09YANA_RFD	YANA
1401	VW0823	116644	2009	2744	5	8	23	W9A09YANA	439	19	100	2	4	IRR	81433	1.6841	mg/g	Hurricane Dehydrator 13/10/09	NA	NA	81433	NA	1	1		W9A09YANA_IRR	YANA
1402	MERINDA	111952	2009	1249	5	8	25	W9A09COLE	297	14	112	2	4	RFD	81435	1.4833	mg/g	Lucerne Dehydrator 19/10	NA	NA	81435	83012	1	2		W9A09COLE_RFD	COLE
1403	HRZ05_0137	112839	2009	601	5	8	26	W9A09COLE	174	22	39	1	2	IRR	81436	2.3603	mg/g	Leeton Hurricane 20/10	NA	NA	81436	NA	1	1		W9A09COLE_IRR	COLE
1404	VW1193	111933	2009	1238	5	8	27	W9A09COLE	449	14	93	2	4	RFD	81437	1.0605	mg/g	Lucerne Dehydrator 19/10	NA	NA	81437	NA	1	1		W9A09COLE_RFD	COLE
1405	VV2678	111276	2009	454	5	8	28	W9A09COLE	408	9	36	1	2	IRR	81438	1.6168	mg/g	Leeton Hurricane 20/10	NA	NA	81438	NA	1	1		W9A09COLE_IRR	COLE
1406	SUNBRI	111079	2009	804	5	8	29	W9A09COLE	372	7	79	2	3	IRR	81439	1.4676	mg/g	Lucerne Dehydrator 19/10	NA	NA	81439	82665	1	2		W9A09COLE_IRR	COLE
1407	QT12667	115916	2009	1660	5	8	30	W9A09YANA	303	14	12	1	1	IRR	81440	1.326	mg/g	Hurricane Dehydrator 13/10/09	NA	NA	81440	NA	1	1		W9A09YANA_IRR	YANA
1408	DAKOTA	113471	2009	1016	5	9	1	W9A09COLE	56	27	71	2	3	IRR	81441	2.3919	mg/g	Yanco Hurricane 19/10	NA	NA	81441	NA	1	1		W9A09COLE_IRR	COLE
1409	VV2678	113238	2009	995	5	9	2	W9A09COLE	408	25	78	2	3	IRR	81442	1.603	mg/g	Yanco Hurricane 19/10	NA	NA	80114	81442	1	2		W9A09COLE_IRR	COLE
1410	WW18957	117131	2009	2447	5	9	3	W9A09YANA	689	23	75	2	3	RFD	81443	0.89268	mg/g	Lucerne Dehydrator 5/10 - 13/10	NA	NA	81443	NA	1	1		W9A09YANA_RFD	YANA
1411	HRZ03_0005	112539	2009	1300	5	9	4	W9A09COLE	88	19	99	2	4	RFD	81444	1.7854	mg/g	Lucerne Dehydrator 19/10	NA	NA	81444	NA	1	1		W9A09COLE_RFD	COLE
1412	WW15839	116668	2009	2754	5	9	5	W9A09YANA	601	19	124	2	4	IRR	81445	1.5037	mg/g	Hurricane Dehydrator 13/10/09	NA	NA	81445	82284	1	2		W9A09YANA_IRR	YANA
1413	NLS03SB52	116069	2009	2007	5	9	6	W9A09YANA	299	15	37	1	2	RFD	81446	1.6479	mg/g	Lucerne Dehydrator 5/10 - 13/10	NA	NA	81446	NA	1	1		W9A09YANA_RFD	YANA
1414	WW19127	113203	2009	638	5	9	7	W9A09COLE	694	25	43	1	2	IRR	81447	1.8304	mg/g	Leeton Hurricane 20/10	NA	NA	81447	NA	1	1		W9A09COLE_IRR	COLE
1415	WW19746	118032	2009	2533	5	9	8	W9A09YANA	736	30	80	2	3	RFD	81448	1.2601	mg/g	Lucerne Dehydrator 5/10 - 13/10	NA	NA	81448	NA	1	1		W9A09YANA_RFD	YANA
1416	TAMMARIN_ROCK	116514	2009	2730	5	9	9	W9A09YANA	375	18	98	2	4	IRR	81449	1.8726	mg/g	Hurricane Dehydrator 13/10/09	NA	NA	81449	NA	1	1		W9A09YANA_IRR	YANA
1417	WW14314	115657	2009	1625	5	9	10	W9A09YANA	582	12	9	1	1	IRR	81450	1.3514	mg/g	Lucerne Dehydrator 5/10 - 13/10	NA	NA	81450	NA	1	1		W9A09YANA_IRR	YANA
1418	WW19864	115307	2009	1936	5	9	11	W9A09YANA	741	9	43	1	2	RFD	81451	1.3083	mg/g	Lucerne Dehydrator then Leeton Farm 13/10/09	NA	NA	81451	NA	1	1		W9A09YANA_RFD	YANA
1419	7896_254	111703	2009	1216	5	9	12	W9A09COLE	16	12	103	2	4	RFD	81452	1.4312	mg/g	Lucerne Dehydrator 19/10	NA	NA	81452	NA	1	1		W9A09COLE_RFD	COLE
1420	HRZ05_0159	111739	2009	143	5	9	13	W9A09COLE	182	13	19	1	1	RFD	81453	1.6406	mg/g	Lucerne Dehydrator 20/10	NA	NA	81453	83263	1	2		W9A09COLE_RFD	COLE
1421	SUN559A	116292	2009	1693	5	9	14	W9A09YANA	364	17	4	1	1	IRR	81454	1.0762	mg/g	Lucerne Dehydrator 5/10 - 13/10	NA	NA	81454	NA	1	1		W9A09YANA_IRR	YANA
1422	WW20652	111153	2009	436	5	9	15	W9A09COLE	784	8	33	1	2	IRR	81455	1.4964	mg/g	Leeton Hurricane 20/10	NA	NA	81455	NA	1	1		W9A09COLE_IRR	COLE
1423	WW19753	114694	2009	2217	5	9	16	W9A09YANA	738	4	70	2	3	RFD	81456	1.2786	mg/g	Lucerne Dehydrator 5/10 - 13/10	NA	NA	81456	NA	1	1		W9A09YANA_RFD	YANA
1424	HRZ04_0206	112214	2009	181	5	9	17	W9A09COLE	128	17	14	1	1	RFD	81457	1.3423	mg/g	Lucerne Dehydrator 20/10	NA	NA	81457	NA	1	1		W9A09COLE_RFD	COLE
1425	RAC1505	115915	2009	1659	5	9	18	W9A09YANA	344	14	11	1	1	IRR	81458	1.6118	mg/g	Lucerne Dehydrator 5/10 - 13/10	NA	NA	81458	82274	1	2		W9A09YANA_IRR	YANA
1426	WW16612	115415	2009	1603	5	9	19	W9A09YANA	610	10	23	1	1	IRR	81459	0.95344	mg/g	Lucerne Dehydrator 13/10/09	NA	NA	81459	NA	1	1		W9A09YANA_IRR	YANA
1427	WW20383	114407	2009	1838	5	9	20	W9A09YANA	765	2	39	1	2	RFD	81460	1.6675	mg/g	Lucerne Dehydrator 13/10/09	NA	NA	81460	NA	1	1		W9A09YANA_RFD	YANA
1428	HRZ06_0321	116526	2009	2734	5	9	21	W9A09YANA	247	18	110	2	4	IRR	81461	1.8839	mg/g	Hurricane Dehydrator 13/10/09	NA	NA	81461	82598	1	2		W9A09YANA_IRR	YANA
1429	120854_183	114604	2009	2575	5	9	22	W9A09YANA	4	3	108	2	4	IRR	81462	1.8624	mg/g	Hurricane Dehydrator 13/10/09	NA	NA	81462	NA	1	1		W9A09YANA_IRR	YANA
1430	WW18957	112775	2009	1322	5	9	23	W9A09COLE	689	21	95	2	4	RFD	81463	1.6091	mg/g	Lucerne Dehydrator 19/10	NA	NA	81463	NA	1	1		W9A09COLE_RFD	COLE
1431	WW14311	113533	2009	301	5	9	25	W9A09COLE	581	28	13	1	1	RFD	81465	2.1697	mg/g	Yanco Hurricane 20/10	NA	NA	81465	NA	1	1	hole	W9A09COLE_RFD	COLE
1432	CURRAWONG	115266	2009	1584	5	9	26	W9A09YANA	55	9	2	1	1	IRR	81466	0.3444	mg/g	Lucerne Dehydrator 13/10/09	NA	NA	81466	NA	1	1		W9A09YANA_IRR	YANA
1433	VT1155	111769	2009	508	5	9	27	W9A09COLE	384	13	49	1	2	IRR	81467	1.7643	mg/g	Leeton Hurricane 20/10	NA	NA	81467	NA	1	1		W9A09COLE_IRR	COLE
1434	RAC1429	115559	2009	1959	5	9	28	W9A09YANA	332	11	39	1	2	RFD	81468	1.2978	mg/g	Lucerne Dehydrator 5/10 - 13/10	NA	NA	81468	NA	1	1		W9A09YANA_RFD	YANA
1435	AUS33585	112524	2009	935	5	9	29	W9A09COLE	35	19	84	2	3	IRR	81469	2.2266	mg/g	Yanco Hurricane 19/10	NA	NA	81469	NA	1	1		W9A09COLE_IRR	COLE
1436	WEEBILL1	113472	2009	1017	5	9	30	W9A09COLE	550	27	72	2	3	IRR	81470	3.2057	mg/g	Yanco Hurricane 19/10	NA	NA	81470	81955	1	2		W9A09COLE_IRR	COLE
1437	WW19746	111626	2009	132	5	10	1	W9A09COLE	736	12	26	1	1	RFD	81471	2.1749	mg/g	Lucerne Dehydrator 20/10	NA	NA	81471	NA	1	1		W9A09COLE_RFD	COLE
1438	VW3463	115522	2009	1607	5	10	2	W9A09YANA	497	11	2	1	1	IRR	81472	1.4752	mg/g	Lucerne Dehydrator 5/10 - 13/10	NA	NA	81472	NA	1	1		W9A09YANA_IRR	YANA
1439	HRZ06_2178	113788	2009	327	5	10	3	W9A09COLE	272	30	28	1	1	RFD	81473	2.2391	mg/g	Yanco Hurricane 20/10	NA	NA	81473	NA	1	1		W9A09COLE_RFD	COLE
1440	WW19201	110770	2009	57	5	10	4	W9A09COLE	697	5	10	1	1	RFD	81474	1.9574	mg/g	Yanco Hurricane 20/10	NA	NA	81474	NA	1	1		W9A09COLE_RFD	COLE
1441	WW20256	115597	2009	2302	5	10	5	W9A09YANA	759	11	77	2	3	RFD	81475	0.71579	mg/g	Lucerne Dehydrator 5/10 - 13/10	NA	NA	81475	NA	1	1		W9A09YANA_RFD	YANA
1442	WW20383	116799	2009	2770	5	10	6	W9A09YANA	765	20	127	2	4	IRR	81476	1.4706	mg/g	Hurricane Dehydrator 13/10/09	NA	NA	81476	81705	1	2		W9A09YANA_IRR	YANA
1443	WW18919	117181	2009	2813	5	10	7	W9A09YANA	682	23	125	2	4	IRR	81477	1.4364	mg/g	Hurricane Dehydrator 13/10/09	NA	NA	81477	NA	1	1		W9A09YANA_IRR	YANA
1444	VQ2791	112634	2009	944	5	10	8	W9A09COLE	378	20	74	2	3	IRR	81478	1.9694	mg/g	Yanco Hurricane 19/10	NA	NA	81478	NA	1	1		W9A09COLE_IRR	COLE
1445	118849_303	112869	2009	955	5	10	9	W9A09COLE	3	22	69	2	3	IRR	81479	2.1136	mg/g	Yanco Hurricane 19/10	NA	NA	81479	NA	1	1		W9A09COLE_IRR	COLE
1446	WYLAH	115885	2009	2670	5	10	10	W9A09YANA	838	13	109	2	4	IRR	81480	0.56692	mg/g	Hurricane Dehydrator 13/10/09	NA	NA	81480	82933	1	2		W9A09YANA_IRR	YANA
1447	EGA_WEDGETAIL	116053	2009	1677	5	10	11	W9A09YANA	65	15	21	1	1	IRR	81481	0.51307	mg/g	Lucerne Dehydrator 13/10/09	NA	NA	81481	NA	1	1		W9A09YANA_IRR	YANA
1448	WAGT022	111650	2009	497	5	10	12	W9A09COLE	525	12	50	1	2	IRR	81482	1.404	mg/g	Leeton Hurricane 20/10	NA	NA	81482	NA	1	1		W9A09COLE_IRR	COLE
1449	VW0394	118175	2009	2555	5	10	13	W9A09YANA	427	31	95	2	3	RFD	81483	1.2215	mg/g	Lucerne Dehydrator 5/10 - 13/10	NA	NA	81483	NA	1	1		W9A09YANA_RFD	YANA
1450	WW19365	112781	2009	1326	5	10	14	W9A09COLE	700	21	101	2	4	RFD	81484	1.5887	mg/g	Lucerne Dehydrator 19/10	NA	NA	81484	NA	1	1		W9A09COLE_RFD	COLE
1451	HRZ06_0292	114447	2009	2203	5	10	15	W9A09YANA	243	2	79	2	3	RFD	81485	1.2864	mg/g	Lucerne Dehydrator 5/10 - 13/10	NA	NA	81485	81874	1	2		W9A09YANA_RFD	YANA
1452	HRZ04_0231	113057	2009	255	5	10	16	W9A09COLE	131	24	17	1	1	RFD	81486	2.6402	mg/g	Yanco Hurricane 20/10	NA	NA	81486	NA	1	1		W9A09COLE_RFD	COLE
1453	RAC1374	115969	2009	2335	5	10	17	W9A09YANA	324	14	65	2	3	RFD	81487	1.2758	mg/g	Lucerne Dehydrator then Leeton Farm 13/10/09	NA	NA	81487	81783	1	2		W9A09YANA_RFD	YANA
1454	B1227E	114869	2009	2595	5	10	18	W9A09YANA	41	5	117	2	4	IRR	81488	1.5717	mg/g	Hurricane Dehydrator 13/10/09	NA	NA	81488	NA	1	1		W9A09YANA_IRR	YANA
1455	WW19754	113508	2009	1383	5	10	19	W9A09COLE	739	27	108	2	4	RFD	81489	1.1551	mg/g	Lucerne Dehydrator 19/10	NA	NA	81489	NA	1	1		W9A09COLE_RFD	COLE
1456	PAVON_DWARF	115057	2009	1914	5	10	20	W9A09YANA	301	7	49	1	2	RFD	81490	1.0254	mg/g	Lucerne Dehydrator 5/10 - 13/10	NA	NA	81490	81933	1	2		W9A09YANA_RFD	YANA
1457	VQ2791	115890	2009	2673	5	10	21	W9A09YANA	378	13	114	2	4	IRR	81491	1.02	mg/g	Hurricane Dehydrator 13/10/09	NA	NA	81491	NA	1	1		W9A09YANA_IRR	YANA
1458	VW0760	113176	2009	266	5	10	22	W9A09COLE	436	25	16	1	1	RFD	81492	1.5702	mg/g	Yanco Hurricane 20/10	NA	NA	81492	NA	1	1		W9A09COLE_RFD	COLE
1459	WW19548	115834	2009	1993	5	10	23	W9A09YANA	710	13	58	1	2	RFD	81493	1.1463	mg/g	Lucerne Dehydrator 5/10 - 13/10	NA	NA	81493	NA	1	1		W9A09YANA_RFD	YANA
1460	QT13354	117480	2009	2123	5	10	24	W9A09YANA	312	26	40	1	2	RFD	81494	1.5711	mg/g	Lucerne Dehydrator 5/10 - 13/10	NA	NA	81494	82639	1	2		W9A09YANA_RFD	YANA
1461	HRZ04_0191	117411	2009	2827	5	10	25	W9A09YANA	122	25	99	2	4	IRR	81495	1.5812	mg/g	Hurricane Dehydrator 13/10/09	NA	NA	81495	NA	1	1		W9A09YANA_IRR	YANA
1462	HRZ06_0491	110338	2009	376	5	10	26	W9A09COLE	253	1	58	1	2	IRR	81496	2.2397	mg/g	Leeton Hurricane 20/10	NA	NA	81496	82317	1	2		W9A09COLE_IRR	COLE
1463	ELLISON	115280	2009	1588	5	10	27	W9A09YANA	67	9	16	1	1	IRR	81497	0.84393	mg/g	Lucerne Dehydrator 5/10 - 13/10	NA	NA	81497	NA	1	1		W9A09YANA_IRR	YANA
1464	HRZ05_0085	115400	2009	1597	5	10	28	W9A09YANA	160	10	8	1	1	IRR	81498	1.4641	mg/g	Lucerne Dehydrator 13/10/09	NA	NA	81498	NA	1	1		W9A09YANA_IRR	YANA
1465	WW19716	113182	2009	267	5	10	29	W9A09COLE	733	25	22	1	1	RFD	81499	2.7252	mg/g	Yanco Hurricane 20/10	NA	NA	81499	NA	1	1		W9A09COLE_RFD	COLE
1466	WW20159	111851	2009	150	5	10	30	W9A09COLE	756	14	11	1	1	RFD	81500	1.8167	mg/g	Lucerne Dehydrator 20/10	NA	NA	81500	NA	1	1		W9A09COLE_RFD	COLE
1467	VW1864	116115	2009	2358	6	1	1	W9A09YANA	458	15	83	2	3	RFD	81501	1.4625	mg/g	Lucerne Dehydrator then Leeton Farm 13/10/09	NA	NA	81501	82798	1	2		W9A09YANA_RFD	YANA
1468	DRYSDALE	113166	2009	260	6	1	2	W9A09COLE	59	25	6	1	1	RFD	81502	1.8906	mg/g	Yanco Hurricane 20/10	NA	NA	81502	NA	1	1		W9A09COLE_RFD	COLE
1469	WAGT019	112379	2009	566	6	1	3	W9A09COLE	523	18	59	1	2	IRR	81503	1.402	mg/g	Leeton Hurricane 20/10	NA	NA	81503	NA	1	1		W9A09COLE_IRR	COLE
1470	WW15839	111647	2009	496	6	1	4	W9A09COLE	601	12	47	1	2	IRR	81504	1.7132	mg/g	Leeton Hurricane 20/10	NA	NA	81504	NA	1	1		W9A09COLE_IRR	COLE
1471	RAC1502	115367	2009	2623	6	1	5	W9A09YANA	342	9	103	2	4	IRR	81505	1.6772	mg/g	Hurricane Dehydrator 13/10/09	NA	NA	81505	NA	1	1		W9A09YANA_IRR	YANA
1472	VW2694	110431	2009	378	6	1	6	W9A09COLE	479	2	31	1	2	IRR	81506	2.14	mg/g	Leeton Hurricane 20/10	NA	NA	81506	NA	1	1		W9A09COLE_IRR	COLE
1473	VW1174	112742	2009	950	6	1	7	W9A09COLE	445	21	62	2	3	IRR	81507	1.6634	mg/g	Yanco Hurricane 19/10	NA	NA	81507	82333	1	2		W9A09COLE_IRR	COLE
1474	WW19127	110480	2009	749	6	1	8	W9A09COLE	694	2	80	2	3	IRR	81508	1.7097	mg/g	Yanco Hurricane 19/10	NA	NA	81508	NA	1	1		W9A09COLE_IRR	COLE
1475	VW0398	112180	2009	1264	6	1	9	W9A09COLE	429	16	100	2	4	RFD	81509	1.1789	mg/g	Lucerne Dehydrator 19/10	NA	NA	81509	NA	1	1		W9A09COLE_RFD	COLE
1476	LPB04_2238	114673	2009	1870	6	1	10	W9A09YANA	284	4	49	1	2	RFD	81510	1.4499	mg/g	Hurricane Dehydrator 13/10/09	NA	NA	81510	NA	1	1		W9A09YANA_RFD	YANA
1477	WW17062	115974	2009	2339	6	1	11	W9A09YANA	612	14	70	2	3	RFD	81511	1.6609	mg/g	Lucerne Dehydrator then Leeton Farm 13/10/09	NA	NA	81511	NA	1	1		W9A09YANA_RFD	YANA
1478	QT12667	113009	2009	979	6	1	12	W9A09COLE	303	23	89	2	3	IRR	81512	1.8802	mg/g	Yanco Hurricane 19/10	NA	NA	81512	NA	1	1		W9A09COLE_IRR	COLE
1479	VW2092	117852	2009	1808	6	1	13	W9A09YANA	463	29	28	1	1	IRR	81513	1.3236	mg/g	Lucerne Dehydrator 5/10 - 13/10	NA	NA	81513	NA	1	1		W9A09YANA_IRR	YANA
1480	DERRIMUT	117722	2009	1792	6	1	14	W9A09YANA	57	28	26	1	1	IRR	81514	1.423	mg/g	Lucerne Dehydrator 5/10 - 13/10	NA	NA	81514	83240	1	2		W9A09YANA_IRR	YANA
1481	HRZ06_0055	114357	2009	2563	6	1	15	W9A09YANA	206	1	117	2	4	IRR	81515	1.6417	mg/g	Hurricane Dehydrator 13/10/09	NA	NA	81515	NA	1	1		W9A09YANA_IRR	YANA
1482	SUN530D	113754	2009	1413	6	1	16	W9A09COLE	358	29	114	2	4	RFD	81516	1.7643	mg/g	Lucerne Dehydrator 19/10	NA	NA	81516	NA	1	1		W9A09COLE_RFD	COLE
1483	WW20689	115159	2009	1579	6	1	17	W9A09YANA	791	8	23	1	1	IRR	81517	1.168	mg/g	Lucerne Dehydrator 13/10/09	NA	NA	81517	NA	1	1		W9A09YANA_IRR	YANA
1484	VW3466	117718	2009	1790	6	1	18	W9A09YANA	498	28	22	1	1	IRR	81518	1.2615	mg/g	Lucerne Dehydrator 5/10 - 13/10	NA	NA	81518	NA	1	1		W9A09YANA_IRR	YANA
1485	VW3195	114975	2009	2251	6	1	19	W9A09YANA	488	6	95	2	3	RFD	81519	0.68351	mg/g	Lucerne Dehydrator 5/10 - 13/10	NA	NA	81519	82220	1	2		W9A09YANA_RFD	YANA
1486	WW20469	110920	2009	416	6	1	20	W9A09COLE	768	6	40	1	2	IRR	81520	1.5027	mg/g	Leeton Hurricane 20/10	NA	NA	81520	NA	1	1		W9A09COLE_IRR	COLE
1487	B1272C4	111957	2009	1250	6	1	21	W9A09COLE	43	14	117	2	4	RFD	81521	0.86633	mg/g	Lucerne Dehydrator 19/10	NA	NA	81521	NA	1	1		W9A09COLE_RFD	COLE
1488	VW0373	111021	2009	81	6	1	23	W9A09COLE	424	7	21	1	1	RFD	81523	2.1678	mg/g	Lucerne Dehydrator 20/10	NA	NA	81523	82677	1	2		W9A09COLE_RFD	COLE
1489	EGA_WEDGETAIL	111341	2009	1184	6	1	24	W9A09COLE	65	9	101	2	4	RFD	81524	1.3888	mg/g	Lucerne Dehydrator 19/10	NA	NA	81524	NA	1	1		W9A09COLE_RFD	COLE
1490	WW18924	117263	2009	2461	6	1	25	W9A09YANA	684	24	79	2	3	RFD	81525	1.3681	mg/g	Lucerne Dehydrator then Leeton Farm 13/10/09	NA	NA	81525	NA	1	1		W9A09YANA_RFD	YANA
1491	WW20484	114891	2009	1544	6	1	26	W9A09YANA	769	6	11	1	1	IRR	81526	1.4174	mg/g	Lucerne Dehydrator 5/10 - 13/10	NA	NA	81526	NA	1	1		W9A09YANA_IRR	YANA
1492	SUN571B	114174	2009	726	6	1	27	W9A09COLE	369	33	54	1	2	IRR	81527	2.3321	mg/g	Leeton Hurricane 20/10	NA	NA	81527	NA	1	1		W9A09COLE_IRR	COLE
1493	HRZ04_0515	113050	2009	252	6	1	28	W9A09COLE	154	24	10	1	1	RFD	81528	2.2318	mg/g	Yanco Hurricane 20/10	NA	NA	81528	82490	1	2		W9A09COLE_RFD	COLE
1494	WW19743	112196	2009	1270	6	1	29	W9A09COLE	735	16	116	2	4	RFD	81529	1.4264	mg/g	Lucerne Dehydrator 19/10	NA	NA	81529	NA	1	1		W9A09COLE_RFD	COLE
1495	WW21687	113315	2009	648	6	1	30	W9A09COLE	827	26	35	1	2	IRR	81530	1.7628	mg/g	Leeton Hurricane 20/10	NA	NA	81530	NA	1	1		W9A09COLE_IRR	COLE
1496	HRZ05_0145	114288	2009	1833	6	2	1	W9A09YANA	177	1	48	1	2	RFD	81531	1.2216	mg/g	Lucerne Dehydrator 5/10 - 13/10	NA	NA	81531	NA	1	1		W9A09YANA_RFD	YANA
1497	WW20665	111669	2009	856	6	2	2	W9A09COLE	786	12	69	2	3	IRR	81532	1.8636	mg/g	Lucerne Dehydrator 19/10	NA	NA	81532	NA	1	1		W9A09COLE_IRR	COLE
1498	LPB04_2351	115660	2009	1628	6	2	4	W9A09YANA	288	12	12	1	1	IRR	81534	1.5177	mg/g	Lucerne Dehydrator 5/10 - 13/10	NA	NA	81534	NA	1	1		W9A09YANA_IRR	YANA
1499	LPB04_2264	115203	2009	2265	6	2	5	W9A09YANA	285	8	67	2	3	RFD	81535	1.1719	mg/g	Lucerne Dehydrator 5/10 - 13/10	NA	NA	81535	NA	1	1		W9A09YANA_RFD	YANA
1500	WW19684	114955	2009	2242	6	2	6	W9A09YANA	731	6	75	2	3	RFD	81536	1.6273	mg/g	Lucerne Dehydrator 5/10 - 13/10	NA	NA	81536	NA	1	1		W9A09YANA_RFD	YANA
1501	WW20406	112279	2009	915	6	2	7	W9A09COLE	767	17	79	2	3	IRR	81537	1.0951	mg/g	Lucerne Dehydrator 19/10	NA	NA	81537	NA	1	1		W9A09COLE_IRR	COLE
1502	LPB03_1109	114113	2009	1451	6	2	8	W9A09COLE	282	32	113	2	4	RFD	81538	1.3242	mg/g	Lucerne Dehydrator 19/10	NA	NA	81538	NA	1	1		W9A09COLE_RFD	COLE
1503	WW18784	112819	2009	228	6	2	9	W9A09COLE	670	22	19	1	1	RFD	81539	2.0248	mg/g	Yanco Hurricane 20/10	NA	NA	81539	NA	1	1		W9A09COLE_RFD	COLE
1504	VW2324	116637	2009	2410	6	2	10	W9A09YANA	467	19	93	2	3	RFD	81540	0.78246	mg/g	Lucerne Dehydrator then Leeton Farm 13/10/09	NA	NA	81540	NA	1	1		W9A09YANA_RFD	YANA
1505	WW19743	110607	2009	759	6	2	11	W9A09COLE	735	3	87	2	3	IRR	81541	1.5275	mg/g	Lucerne Dehydrator 19/10	NA	NA	81541	82233	1	2		W9A09COLE_IRR	COLE
1506	WYUNA	112428	2009	1289	6	2	12	W9A09COLE	839	18	108	2	4	RFD	81542	1.4747	mg/g	Lucerne Dehydrator 19/10	NA	NA	81542	NA	1	1		W9A09COLE_RFD	COLE
1507	VT1020	116888	2009	2430	6	2	13	W9A09YANA	382	21	88	2	3	RFD	81543	0.92988	mg/g	Lucerne Dehydrator 5/10 - 13/10	NA	NA	81543	NA	1	1		W9A09YANA_RFD	YANA
1508	WW19490	113581	2009	1024	6	2	14	W9A09COLE	704	28	61	2	3	IRR	81544	1.9917	mg/g	Yanco Hurricane 19/10	NA	NA	81544	NA	1	1		W9A09COLE_IRR	COLE
1509	QT13390	111414	2009	473	6	2	15	W9A09COLE	316	10	54	1	2	IRR	81545	1.7436	mg/g	Leeton Hurricane 20/10	NA	NA	81545	NA	1	1		W9A09COLE_IRR	COLE
1510	WW14309	114883	2009	1540	6	2	16	W9A09YANA	580	6	3	1	1	IRR	81546	1.4365	mg/g	Lucerne Dehydrator 13/10/09	NA	NA	81546	82938	1	2		W9A09YANA_IRR	YANA
1511	QT13365	116471	2009	2038	6	2	17	W9A09YANA	314	18	55	1	2	RFD	81547	1.438	mg/g	Lucerne Dehydrator 5/10 - 13/10	NA	NA	81547	NA	1	1		W9A09YANA_RFD	YANA
1512	HRZ06_0292	114771	2009	1533	6	2	18	W9A09YANA	243	5	19	1	1	IRR	81548	1.3617	mg/g	Lucerne Dehydrator 13/10/09	NA	NA	81548	NA	1	1		W9A09YANA_IRR	YANA
1513	HRZ04_0421	110657	2009	44	6	2	19	W9A09COLE	147	4	17	1	1	RFD	81549	2.1017	mg/g	Lucerne Dehydrator 20/10	NA	NA	81549	NA	1	1		W9A09COLE_RFD	COLE
1514	HRZ04_0533	111762	2009	504	6	2	20	W9A09COLE	158	13	42	1	2	IRR	81550	2.4334	mg/g	Leeton Hurricane 20/10	NA	NA	81550	NA	1	1	half plot poor row effect cot into 14-12	W9A09COLE_IRR	COLE
1515	VW2092	116613	2009	2402	6	2	21	W9A09YANA	463	19	69	2	3	RFD	81551	1.1572	mg/g	Lucerne Dehydrator 5/10 - 13/10	NA	NA	81551	NA	1	1		W9A09YANA_RFD	YANA
1516	GILES	117929	2009	2878	6	2	22	W9A09YANA	76	29	105	2	4	IRR	81552	1.7902	mg/g	Hurricane Dehydrator 13/10/09	NA	NA	81552	82468	1	2		W9A09YANA_IRR	YANA
1517	JANZ	111813	2009	1228	6	2	23	W9A09COLE	278	13	93	2	4	RFD	81553	1.4587	mg/g	Lucerne Dehydrator 19/10	NA	NA	81553	NA	1	1		W9A09COLE_RFD	COLE
1518	HRZ04_0515	111033	2009	425	6	2	24	W9A09COLE	154	7	33	1	2	IRR	81554	2.0058	mg/g	Leeton Hurricane 20/10	NA	NA	81554	NA	1	1		W9A09COLE_IRR	COLE
1519	ROSELLA	113748	2009	1410	6	2	25	W9A09COLE	346	29	108	2	4	RFD	81555	2.1816	mg/g	Lucerne Dehydrator 19/10	NA	NA	81555	82901	1	2		W9A09COLE_RFD	COLE
1520	WW19660	116005	2009	2681	6	2	26	W9A09YANA	724	14	101	2	4	IRR	81556	1.5452	mg/g	Hurricane Dehydrator 13/10/09	NA	NA	81556	NA	1	1		W9A09YANA_IRR	YANA
1521	HRZ06_0491	117938	2009	2884	6	2	27	W9A09YANA	253	29	114	2	4	IRR	81557	1.9699	mg/g	Hurricane Dehydrator 13/10/09	NA	NA	81557	NA	1	1		W9A09YANA_IRR	YANA
1522	HRZ05_0101	113781	2009	324	6	2	28	W9A09COLE	161	30	21	1	1	RFD	81558	2.1968	mg/g	Yanco Hurricane 20/10	NA	NA	81558	NA	1	1		W9A09COLE_RFD	COLE
1523	WW19565	117512	2009	2481	6	2	29	W9A09YANA	714	26	72	2	3	RFD	81559	0.92057	mg/g	Lucerne Dehydrator 5/10 - 13/10	NA	NA	81559	83256	1	2		W9A09YANA_RFD	YANA
1524	WW20291	111946	2009	1246	6	2	30	W9A09COLE	763	14	106	2	4	RFD	81560	0.98949	mg/g	Lucerne Dehydrator 19/10	NA	NA	81560	NA	1	1		W9A09COLE_RFD	COLE
1525	LPB04_2172	117300	2009	2820	6	3	1	W9A09YANA	283	24	116	2	4	IRR	81561	2.0641	mg/g	Hurricane Dehydrator 13/10/09	NA	NA	81561	NA	1	1		W9A09YANA_IRR	YANA
1526	LPB04_2172	116961	2009	2075	6	3	2	W9A09YANA	283	22	33	1	2	RFD	81562	1.5564	mg/g	Lucerne Dehydrator 5/10 - 13/10	NA	NA	81562	83131	1	2		W9A09YANA_RFD	YANA
1527	VW3708	117477	2009	2122	6	3	3	W9A09YANA	506	26	37	1	2	RFD	81563	1.4333	mg/g	Lucerne Dehydrator then Leeton Farm 13/10/09	NA	NA	81563	NA	1	1		W9A09YANA_RFD	YANA
1528	HRZ06_0079	117360	2009	2112	6	3	4	W9A09YANA	220	25	48	1	2	RFD	81564	1.4751	mg/g	Lucerne Dehydrator 5/10 - 13/10	NA	NA	81564	82713	1	2		W9A09YANA_RFD	YANA
1529	WW19365	113826	2009	1054	6	3	5	W9A09COLE	700	30	66	2	3	IRR	81565	2.035	mg/g	Yanco Hurricane 19/10	NA	NA	81565	NA	1	1		W9A09COLE_IRR	COLE
1530	HRZ06_0323	115822	2009	1987	6	3	6	W9A09YANA	249	13	46	1	2	RFD	81566	1.025	mg/g	Lucerne Dehydrator 5/10 - 13/10	NA	NA	81566	NA	1	1		W9A09YANA_RFD	YANA
1531	WW19864	116748	2009	2418	6	3	7	W9A09YANA	741	20	76	2	3	RFD	81567	1.0924	mg/g	Lucerne Dehydrator 5/10 - 13/10	NA	NA	81567	NA	1	1		W9A09YANA_RFD	YANA
1532	WW19660	115697	2009	1974	6	3	8	W9A09YANA	724	12	49	1	2	RFD	81568	1.364	mg/g	Lucerne Dehydrator 5/10 - 13/10	NA	NA	81568	83168	1	2		W9A09YANA_RFD	YANA
1533	VT1022	115040	2009	1567	6	3	9	W9A09YANA	383	7	32	1	1	IRR	81569	1.2066	mg/g	Lucerne Dehydrator 5/10 - 13/10	NA	NA	81569	NA	1	1		W9A09YANA_IRR	YANA
1534	65211_176	118033	2009	2534	6	3	10	W9A09YANA	12	30	81	2	3	RFD	81570	1.9682	mg/g	Lucerne Dehydrator 5/10 - 13/10	NA	NA	81570	NA	1	1		W9A09YANA_RFD	YANA
1535	WW18957	116771	2009	2756	6	3	11	W9A09YANA	689	20	99	2	4	IRR	81571	1.3407	mg/g	Hurricane Dehydrator 13/10/09	NA	NA	81571	NA	1	1		W9A09YANA_IRR	YANA
1536	65211_176	114228	2009	1457	6	3	12	W9A09COLE	12	33	108	2	4	RFD	81572	2.2295	mg/g	Lucerne Dehydrator 19/10	NA	NA	81572	NA	1	1		W9A09COLE_RFD	COLE
1537	VV2321	113189	2009	269	6	3	13	W9A09COLE	406	25	29	1	1	RFD	81573	1.0399	mg/g	Yanco Hurricane 20/10	NA	NA	81573	83236	1	2		W9A09COLE_RFD	COLE
1538	WW19548	111849	2009	149	6	3	14	W9A09COLE	710	14	9	1	1	RFD	81574	1.9731	mg/g	Lucerne Dehydrator 20/10	NA	NA	81574	NA	1	1		W9A09COLE_RFD	COLE
1539	WW20689	117048	2009	2798	6	3	15	W9A09YANA	791	22	120	2	4	IRR	81575	1.7342	mg/g	Hurricane Dehydrator 13/10/09	NA	NA	81575	NA	1	1		W9A09YANA_IRR	YANA
1540	WW19665	114865	2009	2594	6	3	16	W9A09YANA	728	5	113	2	4	IRR	81576	1.5305	mg/g	Hurricane Dehydrator 13/10/09	NA	NA	81576	NA	1	1		W9A09YANA_IRR	YANA
1541	114892_109	114958	2009	2243	6	3	17	W9A09YANA	2	6	78	2	3	RFD	81577	1.7217	mg/g	Lucerne Dehydrator 5/10 - 13/10	NA	NA	81577	82636	1	2		W9A09YANA_RFD	YANA
1542	WW18925	110877	2009	1151	6	3	18	W9A09COLE	685	5	117	2	4	RFD	81578	1.1691	mg/g	Lucerne Dehydrator 19/10	NA	NA	81578	NA	1	1		W9A09COLE_RFD	COLE
1543	WW19750	116636	2009	2409	6	3	19	W9A09YANA	737	19	92	2	3	RFD	81579	1.1213	mg/g	Lucerne Dehydrator 5/10 - 13/10	NA	NA	81579	NA	1	1		W9A09YANA_RFD	YANA
1544	HRZ06_0033	112946	2009	244	6	3	20	W9A09COLE	192	23	26	1	1	RFD	81580	1.849	mg/g	Yanco Hurricane 20/10	NA	NA	81580	81908	1	2		W9A09COLE_RFD	COLE
1545	HRZ04_0191	113045	2009	248	6	3	21	W9A09COLE	122	24	5	1	1	RFD	81581	1.7654	mg/g	Yanco Hurricane 20/10	NA	NA	81581	NA	1	1		W9A09COLE_RFD	COLE
1546	VW2311	114591	2009	2215	6	3	22	W9A09YANA	465	3	95	2	3	RFD	81582	1.1271	mg/g	Hurricane Dehydrator 13/10/09	NA	NA	81582	NA	1	1		W9A09YANA_RFD	YANA
1547	WW19954	112367	2009	560	6	3	23	W9A09COLE	751	18	47	1	2	IRR	81583	1.5152	mg/g	Leeton Hurricane 20/10	NA	NA	81583	NA	1	1		W9A09COLE_IRR	COLE
1548	NLS03SB52	112705	2009	221	6	3	24	W9A09COLE	299	21	25	1	1	RFD	81584	1.3744	mg/g	Yanco Hurricane 20/10	NA	NA	81584	NA	1	1		W9A09COLE_RFD	COLE
1549	SUN571B	112637	2009	946	6	3	25	W9A09COLE	369	20	77	2	3	IRR	81585	2.1941	mg/g	Yanco Hurricane 19/10	NA	NA	81585	NA	1	1		W9A09COLE_IRR	COLE
1550	PEAKE	114628	2009	1512	6	3	26	W9A09YANA	302	4	4	1	1	IRR	81586	1.445	mg/g	Lucerne Dehydrator 13/10/09	NA	NA	81586	NA	1	1		W9A09YANA_IRR	YANA
1551	RAC1418	115817	2009	1983	6	3	27	W9A09YANA	330	13	41	1	2	RFD	81587	1.4575	mg/g	Lucerne Dehydrator 5/10 - 13/10	NA	NA	81587	82014	1	2		W9A09YANA_RFD	YANA
1552	WAGT033	117533	2009	2490	6	3	28	W9A09YANA	530	26	93	2	3	RFD	81588	1.6335	mg/g	Lucerne Dehydrator 5/10 - 13/10	NA	NA	81588	NA	1	1		W9A09YANA_RFD	YANA
1553	HRZ06_0299	114776	2009	1535	6	3	29	W9A09YANA	244	5	24	1	1	IRR	81589	1.0073	mg/g	Lucerne Dehydrator 5/10 - 13/10	NA	NA	81589	NA	1	1		W9A09YANA_IRR	YANA
1554	WW21842	116433	2009	1710	6	3	30	W9A09YANA	829	18	17	1	1	IRR	81590	1.5277	mg/g	Hurricane Dehydrator 13/10/09	NA	NA	81590	NA	1	1	clear	W9A09YANA_IRR	YANA
1555	HRZ06_0067	116634	2009	2408	6	4	1	W9A09YANA	213	19	90	2	3	RFD	81591	1.3565	mg/g	Lucerne Dehydrator 5/10 - 13/10	NA	NA	81591	81991	1	2		W9A09YANA_RFD	YANA
1556	WEEBILL1	110294	2009	7	6	4	2	W9A09COLE	550	1	14	1	1	RFD	81592	1.9636	mg/g	Yanco Hurricane 20/10	NA	NA	81592	NA	1	1		W9A09COLE_RFD	COLE
1557	VU2828_1	117774	2009	2507	6	4	3	W9A09YANA	390	28	78	2	3	RFD	81593	0.98967	mg/g	Lucerne Dehydrator then Leeton Farm 13/10/09	NA	NA	81593	NA	1	1		W9A09YANA_RFD	YANA
1558	HRZ05_0137	112706	2009	222	6	4	4	W9A09COLE	174	21	26	1	1	RFD	81594	1.7246	mg/g	Yanco Hurricane 20/10	NA	NA	81594	NA	1	1		W9A09COLE_RFD	COLE
1559	RAC1393	116737	2009	2412	6	4	5	W9A09YANA	325	20	65	2	3	RFD	81595	1.4514	mg/g	Lucerne Dehydrator then Leeton Farm 13/10/09	NA	NA	81595	82031	1	2		W9A09YANA_RFD	YANA
1560	LPB04_2238	110730	2009	772	6	4	6	W9A09COLE	284	4	90	2	3	IRR	81596	1.4317	mg/g	Lucerne Dehydrator 19/10	NA	NA	81596	NA	1	1		W9A09COLE_IRR	COLE
1561	VW4326	110857	2009	1142	6	4	7	W9A09COLE	519	5	97	2	4	RFD	81597	1.3591	mg/g	Lucerne Dehydrator 19/10	NA	NA	81597	NA	1	1		W9A09COLE_RFD	COLE
1562	WW19753	115111	2009	2606	6	4	8	W9A09YANA	738	7	103	2	4	IRR	81598	1.6203	mg/g	Hurricane Dehydrator 13/10/09	NA	NA	81598	NA	1	1		W9A09YANA_IRR	YANA
1563	WW19561	115895	2009	2677	6	4	9	W9A09YANA	711	13	119	2	4	IRR	81599	1.4451	mg/g	Hurricane Dehydrator 13/10/09	NA	NA	81599	NA	1	1		W9A09YANA_IRR	YANA
1564	WW19410	113630	2009	1396	6	4	10	W9A09COLE	701	28	110	2	4	RFD	81600	1.6612	mg/g	Lucerne Dehydrator 19/10	NA	NA	81600	82909	1	2		W9A09COLE_RFD	COLE
1565	HRZ06_0079	111741	2009	145	6	4	11	W9A09COLE	220	13	21	1	1	RFD	81601	1.8813	mg/g	Lucerne Dehydrator 20/10	NA	NA	81601	NA	1	1		W9A09COLE_RFD	COLE
1566	WYUNA	114279	2009	1829	6	4	12	W9A09YANA	839	1	39	1	2	RFD	81602	1.283	mg/g	Lucerne Dehydrator 13/10/09	NA	NA	81602	NA	1	1		W9A09YANA_RFD	YANA
1567	VW3398	116508	2009	2397	6	4	13	W9A09YANA	491	18	92	2	3	RFD	81603	1.0762	mg/g	Lucerne Dehydrator 5/10 - 13/10	NA	NA	81603	NA	1	1		W9A09YANA_RFD	YANA
1568	VW4355	112029	2009	890	6	4	14	W9A09COLE	520	15	69	2	3	IRR	81604	1.3706	mg/g	Lucerne Dehydrator 19/10	NA	NA	81604	NA	1	1		W9A09COLE_IRR	COLE
1569	VW4076	114473	2009	2567	6	4	15	W9A09YANA	517	2	105	2	4	IRR	81605	1.3742	mg/g	Hurricane Dehydrator 13/10/09	NA	NA	81605	82518	1	2		W9A09YANA_IRR	YANA
1570	HRZ06_0323	117449	2009	1767	6	4	16	W9A09YANA	249	26	9	1	1	IRR	81606	0.9926	mg/g	Hurricane Dehydrator 13/10/09	NA	NA	81606	NA	1	1		W9A09YANA_IRR	YANA
1571	VW2092	110524	2009	26	6	4	17	W9A09COLE	463	3	4	1	1	RFD	81607	2.3448	mg/g	Yanco Hurricane 20/10	NA	NA	81607	NA	1	1		W9A09COLE_RFD	COLE
1572	HRZ04_0513	115627	2009	2650	6	4	18	W9A09YANA	152	11	107	2	4	IRR	81608	1.6771	mg/g	Hurricane Dehydrator 13/10/09	NA	NA	81608	NA	1	1		W9A09YANA_IRR	YANA
1573	VW3744	117777	2009	2509	6	4	19	W9A09YANA	510	28	81	2	3	RFD	81609	1.1397	mg/g	Lucerne Dehydrator then Leeton Farm 13/10/09	NA	NA	81609	NA	1	1		W9A09YANA_RFD	YANA
1574	DAKOTA	112083	2009	169	6	4	20	W9A09COLE	56	16	3	1	1	RFD	81610	2.2898	mg/g	Lucerne Dehydrator 20/10	NA	NA	81610	NA	1	1		W9A09COLE_RFD	COLE
1575	WW21573	114973	2009	2250	6	4	21	W9A09YANA	825	6	93	2	3	RFD	81611	1.0784	mg/g	Lucerne Dehydrator 5/10 - 13/10	NA	NA	81611	82266	1	2	W9A08COLE	W9A09YANA_RFD	YANA
1576	LPB0602	110483	2009	750	6	4	22	W9A09COLE	294	2	83	2	3	IRR	81612	1.6551	mg/g	Yanco Hurricane 19/10	NA	NA	81612	NA	1	1		W9A09COLE_IRR	COLE
1577	WW3028_4	113047	2009	250	6	4	23	W9A09COLE	834	24	7	1	1	RFD	81613	1.9381	mg/g	Yanco Hurricane 20/10	NA	NA	81613	NA	1	1		W9A09COLE_RFD	COLE
1578	BARHAM	115570	2009	1966	6	4	24	W9A09YANA	48	11	50	1	2	RFD	81614	0.73395	mg/g	Lucerne Dehydrator 5/10 - 13/10	NA	NA	81614	NA	1	1		W9A09YANA_RFD	YANA
1579	WW18957	110320	2009	371	6	4	25	W9A09COLE	689	1	40	1	2	IRR	81615	1.3823	mg/g	Leeton Hurricane 20/10	NA	NA	81615	NA	1	1		W9A09COLE_IRR	COLE
1580	WW17062	110964	2009	794	6	4	26	W9A09COLE	612	6	84	2	3	IRR	81616	1.4385	mg/g	Lucerne Dehydrator 19/10	NA	NA	81616	81810	1	2		W9A09COLE_IRR	COLE
1581	VW4076	110740	2009	1132	6	4	27	W9A09COLE	517	4	100	2	4	RFD	81617	1.5495	mg/g	Lucerne Dehydrator 19/10	NA	NA	81617	NA	1	1		W9A09COLE_RFD	COLE
1582	WAGT020	111511	2009	476	6	4	28	W9A09COLE	524	11	31	1	2	IRR	81618	1.7485	mg/g	Leeton Hurricane 20/10	NA	NA	81618	NA	1	1		W9A09COLE_IRR	COLE
1583	VW0373	111754	2009	499	6	4	29	W9A09COLE	424	13	34	1	2	IRR	81619	1.3886	mg/g	Leeton Hurricane 20/10	NA	NA	81619	NA	1	1		W9A09COLE_IRR	COLE
1584	HRZ06_0270	118003	2009	2177	6	4	30	W9A09YANA	239	30	51	1	2	RFD	81620	1.6434	mg/g	Lucerne Dehydrator 5/10 - 13/10	NA	NA	81620	82813	1	2		W9A09YANA_RFD	YANA
1585	HRZ06_0141	116000	2009	2351	6	5	1	W9A09YANA	221	14	96	2	3	RFD	81621	0.92654	mg/g	Lucerne Dehydrator then Leeton Farm 13/10/09	NA	NA	81621	NA	1	1		W9A09YANA_RFD	YANA
1586	VW1190	112159	2009	903	6	5	2	W9A09COLE	447	16	79	2	3	IRR	81622	1.784	mg/g	Yanco Hurricane 19/10	NA	NA	81622	NA	1	1		W9A09COLE_IRR	COLE
1587	CHARA	116785	2009	2762	6	5	3	W9A09YANA	52	20	113	2	4	IRR	81623	1.6592	mg/g	Hurricane Dehydrator 13/10/09	NA	NA	81623	NA	1	1		W9A09YANA_IRR	YANA
1588	WW20159	114151	2009	718	6	5	4	W9A09COLE	756	33	31	1	2	IRR	81624	1.4832	mg/g	Leeton Hurricane 20/10	NA	NA	81624	NA	1	1		W9A09COLE_IRR	COLE
1589	VW0857	117708	2009	1789	6	5	5	W9A09YANA	440	28	12	1	1	IRR	81625	1.4918	mg/g	Lucerne Dehydrator 5/10 - 13/10	NA	NA	81625	NA	1	1		W9A09YANA_IRR	YANA
1590	95757_7	113033	2009	1350	6	5	6	W9A09COLE	24	23	113	2	4	RFD	81626	1.6851	mg/g	Lucerne Dehydrator 19/10	NA	NA	81626	82717	1	2		W9A09COLE_RFD	COLE
1591	VW2782	110547	2009	36	6	5	8	W9A09COLE	482	3	27	1	1	RFD	81628	1.7366	mg/g	Yanco Hurricane 20/10	NA	NA	81628	NA	1	1		W9A09COLE_RFD	COLE
1592	WI25099	110789	2009	65	6	5	9	W9A09COLE	557	5	29	1	1	RFD	81629	1.4176	mg/g	Lucerne Dehydrator 20/10	NA	NA	81629	82457	1	2		W9A09COLE_RFD	COLE
1593	VW0379	112207	2009	178	6	5	10	W9A09COLE	425	17	7	1	1	RFD	81630	1.8737	mg/g	Lucerne Dehydrator 20/10	NA	NA	81630	NA	1	1		W9A09COLE_RFD	COLE
1594	PASTOR	111939	2009	1241	6	5	11	W9A09COLE	300	14	99	2	4	RFD	81631	1.5214	mg/g	Lucerne Dehydrator 19/10	NA	NA	81631	NA	1	1		W9A09COLE_RFD	COLE
1595	VW1194	113580	2009	683	6	5	12	W9A09COLE	450	28	60	1	2	IRR	81632	1.2543	mg/g	Leeton Hurricane 20/10	NA	NA	81632	82694	1	2		W9A09COLE_IRR	COLE
1596	VU2828_1	115646	2009	2659	6	5	13	W9A09YANA	390	11	126	2	4	IRR	81633	1.7593	mg/g	Hurricane Dehydrator 13/10/09	NA	NA	81633	NA	1	1		W9A09YANA_IRR	YANA
1597	WW16452	113035	2009	1351	6	5	14	W9A09COLE	608	23	115	2	4	RFD	81634	1.5408	mg/g	Lucerne Dehydrator 19/10	NA	NA	81634	NA	1	1		W9A09COLE_RFD	COLE
1598	VW2705	113523	2009	298	6	5	15	W9A09COLE	480	28	3	1	1	RFD	81635	2.6017	mg/g	Yanco Hurricane 20/10	NA	NA	81635	NA	1	1		W9A09COLE_RFD	COLE
1599	WW19716	114175	2009	727	6	5	16	W9A09COLE	733	33	55	1	2	IRR	81636	2.2235	mg/g	Leeton Hurricane 20/10	NA	NA	81636	82256	1	2		W9A09COLE_IRR	COLE
1600	VW3595	117261	2009	2460	6	5	17	W9A09YANA	503	24	77	2	3	RFD	81637	1.6256	mg/g	Lucerne Dehydrator then Leeton Farm 13/10/09	NA	NA	81637	NA	1	1		W9A09YANA_RFD	YANA
1601	WW20558	113299	2009	279	6	5	18	W9A09COLE	774	26	19	1	1	RFD	81638	2.2817	mg/g	Yanco Hurricane 20/10	NA	NA	81638	NA	1	1		W9A09COLE_RFD	COLE
1602	WAWHT2793	114046	2009	713	6	5	19	W9A09COLE	536	32	46	1	2	IRR	81639	2.4375	mg/g	Leeton Hurricane 20/10	NA	NA	81639	82237	1	2		W9A09COLE_IRR	COLE
1603	HRZ06_0004	117591	2009	1784	6	5	20	W9A09YANA	190	27	23	1	1	IRR	81640	1.1363	mg/g	Lucerne Dehydrator 5/10 - 13/10	NA	NA	81640	NA	1	1		W9A09YANA_IRR	YANA
1604	VW3457	115286	2009	1592	6	5	21	W9A09YANA	496	9	22	1	1	IRR	81641	1.4372	mg/g	Lucerne Dehydrator 13/10/09	NA	NA	81641	NA	1	1		W9A09YANA_IRR	YANA
1605	WAWHT2793	117746	2009	2150	6	5	22	W9A09YANA	536	28	50	1	2	RFD	81642	1.3203	mg/g	Lucerne Dehydrator 5/10 - 13/10	NA	NA	81642	NA	1	1		W9A09YANA_RFD	YANA
1606	WW19660	110970	2009	796	6	5	23	W9A09COLE	724	6	90	2	3	IRR	81643	1.3579	mg/g	Lucerne Dehydrator 19/10	NA	NA	81643	NA	1	1		W9A09COLE_IRR	COLE
1607	HRZ04_0206	117546	2009	2846	6	5	24	W9A09YANA	128	26	106	2	4	IRR	81644	1.69	mg/g	Hurricane Dehydrator 13/10/09	NA	NA	81644	83076	1	2		W9A09YANA_IRR	YANA
1608	B1272C4	111188	2009	810	6	5	25	W9A09COLE	43	8	68	2	3	IRR	81645	2.0583	mg/g	Lucerne Dehydrator 19/10	NA	NA	81645	NA	1	1		W9A09COLE_IRR	COLE
1609	WW20665	116113	2009	2357	6	5	26	W9A09YANA	786	15	81	2	3	RFD	81646	1.1488	mg/g	Lucerne Dehydrator then Leeton Farm 13/10/09	NA	NA	81646	NA	1	1		W9A09YANA_RFD	YANA
1610	SERI_DWARF	113897	2009	335	6	5	27	W9A09COLE	348	31	17	1	1	RFD	81647	1.9241	mg/g	Yanco Hurricane 20/10	NA	NA	81647	NA	1	1		W9A09COLE_RFD	COLE
1611	LPB04_2324	112136	2009	543	6	5	28	W9A09COLE	287	16	56	1	2	IRR	81648	1.6554	mg/g	Leeton Hurricane 20/10	NA	NA	81648	81852	1	2		W9A09COLE_IRR	COLE
1612	SUN562A	113905	2009	337	6	5	29	W9A09COLE	366	31	25	1	1	RFD	81649	2.0799	mg/g	Yanco Hurricane 20/10	NA	NA	81649	NA	1	1		W9A09COLE_RFD	COLE
1613	QT13354	110525	2009	27	6	5	30	W9A09COLE	312	3	5	1	1	RFD	81650	2.2815	mg/g	Lucerne Dehydrator 20/10	NA	NA	81650	NA	1	1		W9A09COLE_RFD	COLE
1614	EGA_WEDGETAIL	113404	2009	283	6	6	1	W9A09COLE	65	27	4	1	1	RFD	81651	2.9562	mg/g	Yanco Hurricane 20/10	NA	NA	81651	NA	1	1		W9A09COLE_RFD	COLE
1615	118849_303	113738	2009	1406	6	6	2	W9A09COLE	3	29	98	2	4	RFD	81652	2.0261	mg/g	Lucerne Dehydrator 19/10	NA	NA	81652	NA	1	1		W9A09COLE_RFD	COLE
1616	VW3708	115136	2009	2615	6	6	3	W9A09YANA	506	7	128	2	4	IRR	81653	1.6006	mg/g	Hurricane Dehydrator 13/10/09	NA	NA	80136	81653	1	2		W9A09YANA_IRR	YANA
1617	WI25053	110281	2009	1	6	6	4	W9A09COLE	551	1	1	1	1	RFD	81654	1.0092	mg/g	Yanco Hurricane 20/10	NA	NA	81654	NA	1	1		W9A09COLE_RFD	COLE
1618	QT13365	110515	2009	1113	6	6	5	W9A09COLE	314	2	115	2	4	RFD	81655	1.2672	mg/g	Lucerne Dehydrator 19/10	NA	NA	81655	NA	1	1		W9A09COLE_RFD	COLE
1619	VW2843	116765	2009	2421	6	6	6	W9A09YANA	483	20	93	2	3	RFD	81656	1.0387	mg/g	Lucerne Dehydrator 5/10 - 13/10	NA	NA	81656	NA	1	1		W9A09YANA_RFD	YANA
1620	WW18925	116370	2009	2378	6	6	7	W9A09YANA	685	17	82	2	3	RFD	81657	0.99622	mg/g	Lucerne Dehydrator 5/10 - 13/10	NA	NA	80748	81657	1	2		W9A09YANA_RFD	YANA
1621	133513_133	112257	2009	555	6	6	8	W9A09COLE	5	17	57	1	2	IRR	81658	1.8353	mg/g	Leeton Hurricane 20/10	NA	NA	81658	NA	1	1		W9A09COLE_IRR	COLE
1622	EGA_STAMPEDE	116356	2009	2370	6	6	9	W9A09YANA	64	17	68	2	3	RFD	81659	0.98088	mg/g	Lucerne Dehydrator 5/10 - 13/10	NA	NA	81659	NA	1	1		W9A09YANA_RFD	YANA
1623	WW18924	112663	2009	1314	6	6	10	W9A09COLE	684	20	103	2	4	RFD	81660	1.545	mg/g	Lucerne Dehydrator 19/10	NA	NA	81660	NA	1	1		W9A09COLE_RFD	COLE
1624	WW19565	110802	2009	404	6	6	11	W9A09COLE	714	5	42	1	2	IRR	81661	1.7402	mg/g	Leeton Hurricane 20/10	NA	NA	81661	NA	1	1		W9A09COLE_IRR	COLE
1625	HRZ04_0188	111524	2009	479	6	6	12	W9A09COLE	121	11	44	1	2	IRR	81662	1.3757	mg/g	Leeton Hurricane 20/10	NA	NA	81662	NA	1	1		W9A09COLE_IRR	COLE
1626	AUS33585	111528	2009	481	6	6	13	W9A09COLE	35	11	48	1	2	IRR	81663	1.4708	mg/g	Leeton Hurricane 20/10	NA	NA	80683	81663	1	2		W9A09COLE_IRR	COLE
1627	WW9696	115505	2009	2639	6	6	14	W9A09YANA	837	10	113	2	4	IRR	81664	1.9154	mg/g	Hurricane Dehydrator 13/10/09	NA	NA	81664	NA	1	1		W9A09YANA_IRR	YANA
1628	WW17950	117040	2009	2795	6	6	15	W9A09YANA	625	22	112	2	4	IRR	81665	1.6347	mg/g	Hurricane Dehydrator 13/10/09	NA	NA	81665	NA	1	1		W9A09YANA_IRR	YANA
1629	WW19632	116426	2009	1706	6	6	16	W9A09YANA	719	18	10	1	1	IRR	81666	1.4338	mg/g	Lucerne Dehydrator 5/10 - 13/10	NA	NA	81666	NA	1	1		W9A09YANA_IRR	YANA
1630	VW4326	110326	2009	372	6	6	17	W9A09COLE	519	1	46	1	2	IRR	81667	1.6092	mg/g	Leeton Hurricane 20/10	NA	NA	81667	NA	1	1		W9A09COLE_IRR	COLE
1631	ZEBU	117436	2009	2837	6	6	18	W9A09YANA	841	25	124	2	4	IRR	81668	1.951	mg/g	Hurricane Dehydrator 13/10/09	NA	NA	80701	81668	1	2		W9A09YANA_IRR	YANA
1632	VQ2791	117137	2009	2450	6	6	19	W9A09YANA	378	23	81	2	3	RFD	81669	0.69107	mg/g	Lucerne Dehydrator 5/10 - 13/10	NA	NA	81669	NA	1	1		W9A09YANA_RFD	YANA
1633	WW18791	115791	2009	1647	6	6	20	W9A09YANA	671	13	15	1	1	IRR	81670	1.3682	mg/g	Lucerne Dehydrator 5/10 - 13/10	NA	NA	81670	NA	1	1		W9A09YANA_IRR	YANA
1634	WW19663	117409	2009	2825	6	6	21	W9A09YANA	727	25	97	2	4	IRR	81671	1.4866	mg/g	Hurricane Dehydrator 13/10/09	NA	NA	81671	NA	1	1		W9A09YANA_IRR	YANA
1635	VW2847	115070	2009	1920	6	6	22	W9A09YANA	484	7	62	1	2	RFD	81672	2.0068	mg/g	Lucerne Dehydrator 5/10 - 13/10	NA	NA	80415	81672	1	2		W9A09YANA_RFD	YANA
1636	VW2001	112212	2009	180	6	6	23	W9A09COLE	461	17	12	1	1	RFD	81673	1.7585	mg/g	Lucerne Dehydrator 20/10	NA	NA	81673	NA	1	1		W9A09COLE_RFD	COLE
1637	SUN570D	115049	2009	1910	6	6	24	W9A09YANA	368	7	41	1	2	RFD	81674	1.5844	mg/g	Lucerne Dehydrator 5/10 - 13/10	NA	NA	81674	NA	1	1		W9A09YANA_RFD	YANA
1638	VW1286	116248	2009	2366	6	6	25	W9A09YANA	453	16	88	2	3	RFD	81675	0.78816	mg/g	Lucerne Dehydrator 5/10 - 13/10	NA	NA	81675	NA	1	1		W9A09YANA_RFD	YANA
1639	HRZ06_0043	116640	2009	2411	6	6	26	W9A09YANA	200	19	96	2	3	RFD	81676	1.0262	mg/g	Lucerne Dehydrator 5/10 - 13/10	NA	NA	81676	NA	1	1		W9A09YANA_RFD	YANA
1640	LPB04_2238	111757	2009	501	6	6	27	W9A09COLE	284	13	37	1	2	IRR	81677	2.0735	mg/g	Leeton Hurricane 20/10	NA	NA	81677	NA	1	1		W9A09COLE_IRR	COLE
1641	WW19932	118044	2009	2540	6	6	28	W9A09YANA	747	30	92	2	3	RFD	81678	1.0985	mg/g	Lucerne Dehydrator 5/10 - 13/10	NA	NA	81678	NA	1	1		W9A09YANA_RFD	YANA
1642	WW21842	113190	2009	270	6	6	29	W9A09COLE	829	25	30	1	1	RFD	81679	1.6124	mg/g	Yanco Hurricane 20/10	NA	NA	80193	81679	1	2		W9A09COLE_RFD	COLE
1643	HRZ06_0057	117160	2009	2806	6	6	30	W9A09YANA	207	23	104	2	4	IRR	81680	1.9025	mg/g	Hurricane Dehydrator 13/10/09	NA	NA	81680	NA	1	1		W9A09YANA_IRR	YANA
1644	VW3398	115784	2009	1643	6	7	1	W9A09YANA	491	13	8	1	1	IRR	81681	1.141	mg/g	Lucerne Dehydrator 5/10 - 13/10	NA	NA	81681	NA	1	1		W9A09YANA_IRR	YANA
1645	AXE	110540	2009	30	6	7	2	W9A09COLE	40	3	20	1	1	RFD	81682	0.88389	mg/g	Yanco Hurricane 20/10	NA	NA	81682	NA	1	1		W9A09COLE_RFD	COLE
1646	SUN530D	111069	2009	801	6	7	3	W9A09COLE	358	7	69	2	3	IRR	81683	1.3566	mg/g	Lucerne Dehydrator 19/10	NA	NA	81683	NA	1	1		W9A09COLE_IRR	COLE
1647	PASTOR	114918	2009	1894	6	7	4	W9A09YANA	300	6	38	1	2	RFD	81684	1.4154	mg/g	Hurricane Dehydrator 13/10/09	NA	NA	81684	NA	1	1		W9A09YANA_RFD	YANA
1648	HRZ05_0137	117302	2009	2821	6	7	5	W9A09YANA	174	24	118	2	4	IRR	81685	1.6426	mg/g	Hurricane Dehydrator 13/10/09	NA	NA	80152	81685	1	2		W9A09YANA_IRR	YANA
1649	RAC1398	112724	2009	592	6	7	6	W9A09COLE	326	21	44	1	2	IRR	81686	1.5984	mg/g	Leeton Hurricane 20/10	NA	NA	81686	NA	1	1		W9A09COLE_IRR	COLE
1650	VW2410	117238	2009	2105	6	7	7	W9A09YANA	475	24	54	1	2	RFD	81687	1.6662	mg/g	Lucerne Dehydrator 5/10 - 13/10	NA	NA	81687	NA	1	1		W9A09YANA_RFD	YANA
1651	WW18805	115376	2009	2628	6	7	8	W9A09YANA	673	9	112	2	4	IRR	81688	1.5571	mg/g	Hurricane Dehydrator 13/10/09	NA	NA	81688	NA	1	1		W9A09YANA_IRR	YANA
1652	HRZ06_0141	112836	2009	599	6	7	9	W9A09COLE	221	22	36	1	2	IRR	81689	2.5245	mg/g	Leeton Hurricane 20/10	NA	NA	81689	NA	1	1		W9A09COLE_IRR	COLE
1653	VW0394	111585	2009	1208	6	7	10	W9A09COLE	427	11	105	2	4	RFD	81690	1.1284	mg/g	Lucerne Dehydrator 19/10	NA	NA	80865	81690	1	2		W9A09COLE_RFD	COLE
1654	HRZ04_0231	112300	2009	1276	6	7	11	W9A09COLE	131	17	100	2	4	RFD	81691	2.1101	mg/g	Lucerne Dehydrator 19/10	NA	NA	81691	NA	1	1		W9A09COLE_RFD	COLE
1655	HRZ04_0111	113197	2009	636	6	7	12	W9A09COLE	107	25	37	1	2	IRR	81692	1.6489	mg/g	Leeton Hurricane 20/10	NA	NA	81692	NA	1	1		W9A09COLE_IRR	COLE
1656	VT1020	114380	2009	1480	6	7	13	W9A09YANA	382	2	12	1	1	IRR	81693	1.5512	mg/g	Lucerne Dehydrator 5/10 - 13/10	NA	NA	81693	NA	1	1		W9A09YANA_IRR	YANA
1657	VW3473	111348	2009	1189	6	7	14	W9A09COLE	500	9	108	2	4	RFD	81694	1.483	mg/g	Lucerne Dehydrator 19/10	NA	NA	81193	81694	1	2		W9A09COLE_RFD	COLE
1658	HRZ05_0132	114508	2009	1497	6	7	15	W9A09YANA	172	3	12	1	1	IRR	81695	1.2714	mg/g	Lucerne Dehydrator 5/10 - 13/10	NA	NA	81695	NA	1	1		W9A09YANA_IRR	YANA
1659	WW18924	112369	2009	561	6	7	16	W9A09COLE	684	18	49	1	2	IRR	81696	1.5062	mg/g	Leeton Hurricane 20/10	NA	NA	81696	NA	1	1		W9A09COLE_IRR	COLE
1660	BOLAC	118026	2009	2530	6	7	17	W9A09YANA	49	30	74	2	3	RFD	81697	1.5984	mg/g	Lucerne Dehydrator 5/10 - 13/10	NA	NA	81697	NA	1	1		W9A09YANA_RFD	YANA
1661	VW1864	110380	2009	1097	6	7	18	W9A09COLE	458	1	100	2	4	RFD	81698	1.7885	mg/g	Lucerne Dehydrator 19/10	NA	NA	81698	NA	1	1		W9A09COLE_RFD	COLE
1662	VT1022	111709	2009	1222	6	7	19	W9A09COLE	383	12	109	2	4	RFD	81699	1.349	mg/g	Lucerne Dehydrator 19/10	NA	NA	81699	NA	1	1		W9A09COLE_RFD	COLE
1663	QT13365	112956	2009	618	6	7	20	W9A09COLE	314	23	36	1	2	IRR	81700	1.9744	mg/g	Leeton Hurricane 20/10	NA	NA	80462	81700	1	2		W9A09COLE_IRR	COLE
1664	WW20652	118076	2009	2908	6	7	21	W9A09YANA	784	30	124	2	4	IRR	81701	1.8584	mg/g	Hurricane Dehydrator 13/10/09	NA	NA	81701	NA	1	1		W9A09YANA_IRR	YANA
1665	VW3473	110328	2009	373	6	7	22	W9A09COLE	500	1	48	1	2	IRR	81702	1.5756	mg/g	Leeton Hurricane 20/10	NA	NA	81702	NA	1	1		W9A09COLE_IRR	COLE
1666	EGA_JAEGER	116918	2009	2783	6	7	23	W9A09YANA	63	21	118	2	4	IRR	81703	1.9672	mg/g	Hurricane Dehydrator 13/10/09	NA	NA	80348	81703	1	2		W9A09YANA_IRR	YANA
1667	NLS03SB52	117910	2009	2524	6	7	24	W9A09YANA	299	29	86	2	3	RFD	81704	1.3417	mg/g	Lucerne Dehydrator then Leeton Farm 13/10/09	NA	NA	81704	NA	1	1		W9A09YANA_RFD	YANA
1668	WW20383	116799	2009	2770	6	7	25	W9A09YANA	765	20	127	2	4	IRR	81705	1.5839	mg/g	Hurricane Dehydrator 13/10/09	NA	NA	81476	81705	1	2		W9A09YANA_IRR	YANA
1669	HRZ05_0085	111716	2009	1225	6	7	26	W9A09COLE	160	12	116	2	4	RFD	81706	1.7214	mg/g	Lucerne Dehydrator 19/10	NA	NA	81706	NA	1	1		W9A09COLE_RFD	COLE
1670	WW19147	112219	2009	184	6	7	27	W9A09COLE	695	17	19	1	1	RFD	81707	1.841	mg/g	Lucerne Dehydrator 20/10	NA	NA	81707	NA	1	1		W9A09COLE_RFD	COLE
1671	WW18791	114465	2009	2566	6	7	28	W9A09YANA	671	2	97	2	4	IRR	81708	1.6748	mg/g	Hurricane Dehydrator 13/10/09	NA	NA	81708	NA	1	1		W9A09YANA_IRR	YANA
1672	PASTOR	115674	2009	1636	6	7	29	W9A09YANA	300	12	26	1	1	IRR	81709	1.3395	mg/g	Lucerne Dehydrator 5/10 - 13/10	NA	NA	81709	NA	1	1		W9A09YANA_IRR	YANA
1673	VW4368	113907	2009	339	6	7	30	W9A09COLE	521	31	27	1	1	RFD	81710	2.4512	mg/g	Yanco Hurricane 20/10	NA	NA	81710	NA	1	1		W9A09COLE_RFD	COLE
1674	WW14396	112078	2009	1260	6	8	1	W9A09COLE	583	15	118	2	4	RFD	81711	1.004	mg/g	Lucerne Dehydrator 19/10	NA	NA	81711	NA	1	1		W9A09COLE_RFD	COLE
1675	HRZ04_0421	114684	2009	1874	6	8	2	W9A09YANA	147	4	60	1	2	RFD	81712	1.5801	mg/g	Lucerne Dehydrator 5/10 - 13/10	NA	NA	80580	81712	1	2		W9A09YANA_RFD	YANA
1676	HRZ04_0206	111294	2009	461	6	8	3	W9A09COLE	128	9	54	1	2	IRR	81713	1.5953	mg/g	Leeton Hurricane 20/10	NA	NA	81713	NA	1	1		W9A09COLE_IRR	COLE
1677	WW18925	116388	2009	2715	6	8	4	W9A09YANA	685	17	100	2	4	IRR	81714	1.6028	mg/g	Hurricane Dehydrator 13/10/09	NA	NA	81714	NA	1	1		W9A09YANA_IRR	YANA
1678	HRZ06_0033	110613	2009	1117	6	8	5	W9A09COLE	192	3	93	2	4	RFD	81715	1.0358	mg/g	Lucerne Dehydrator 19/10	NA	NA	81715	NA	1	1		W9A09COLE_RFD	COLE
1679	HRZ04_0354	110287	2009	4	6	8	6	W9A09COLE	142	1	7	1	1	RFD	81716	1.1128	mg/g	Yanco Hurricane 20/10	NA	NA	81716	NA	1	1		W9A09COLE_RFD	COLE
1680	9329_13	112361	2009	558	6	8	7	W9A09COLE	23	18	41	1	2	IRR	81717	1.5459	mg/g	Leeton Hurricane 20/10	NA	NA	81717	NA	1	1		W9A09COLE_IRR	COLE
1681	HRZ06_0265	115441	2009	1953	6	8	8	W9A09YANA	237	10	49	1	2	RFD	81718	1.5203	mg/g	Lucerne Dehydrator then Leeton Farm 13/10/09	NA	NA	81044	81718	1	2		W9A09YANA_RFD	YANA
1682	WW19884	113119	2009	984	6	8	9	W9A09COLE	745	24	79	2	3	IRR	81719	2.3481	mg/g	Yanco Hurricane 19/10	NA	NA	81719	NA	1	1		W9A09COLE_IRR	COLE
1683	VW3717	110464	2009	743	6	8	10	W9A09COLE	509	2	64	2	3	IRR	81720	1.7136	mg/g	Yanco Hurricane 19/10	NA	NA	81720	NA	1	1		W9A09COLE_IRR	COLE
1684	WW19826	112896	2009	1339	6	8	11	W9A09COLE	740	22	96	2	4	RFD	81721	1.6575	mg/g	Lucerne Dehydrator 19/10	NA	NA	80321	81721	1	2		W9A09COLE_RFD	COLE
1685	90670_91	110595	2009	755	6	8	12	W9A09COLE	22	3	75	2	3	IRR	81722	1.7799	mg/g	Lucerne Dehydrator 19/10	NA	NA	81722	NA	1	1		W9A09COLE_IRR	COLE
1686	SUN562A	116173	2009	1687	6	8	13	W9A09YANA	366	16	13	1	1	IRR	81723	1.0735	mg/g	Lucerne Dehydrator 13/10/09	NA	NA	81723	NA	1	1		W9A09YANA_IRR	YANA
1687	WYUNA	116150	2009	2695	6	8	14	W9A09YANA	839	15	118	2	4	IRR	81724	1.1714	mg/g	Hurricane Dehydrator 13/10/09	NA	NA	81724	NA	1	1		W9A09YANA_IRR	YANA
1688	HRZ04_0531	110733	2009	1129	6	8	15	W9A09COLE	156	4	93	2	4	RFD	81725	1.3561	mg/g	Lucerne Dehydrator 19/10	NA	NA	80184	81725	1	2		W9A09COLE_RFD	COLE
1689	VS2177	112007	2009	531	6	8	16	W9A09COLE	381	15	47	1	2	IRR	81726	1.6313	mg/g	Leeton Hurricane 20/10	NA	NA	81726	NA	1	1		W9A09COLE_IRR	COLE
1690	VW3405	115417	2009	1604	6	8	17	W9A09YANA	494	10	25	1	1	IRR	81727	1.4889	mg/g	Lucerne Dehydrator 5/10 - 13/10	NA	NA	81727	NA	1	1		W9A09YANA_IRR	YANA
1691	WW20291	112112	2009	534	6	8	18	W9A09COLE	763	16	32	1	2	IRR	81728	1.3936	mg/g	Leeton Hurricane 20/10	NA	NA	81728	NA	1	1		W9A09COLE_IRR	COLE
1692	WW19514	112261	2009	908	6	8	19	W9A09COLE	708	17	61	2	3	IRR	81729	1.3947	mg/g	Lucerne Dehydrator 19/10	NA	NA	80927	81729	1	2		W9A09COLE_IRR	COLE
1693	WW16452	114312	2009	2195	6	8	20	W9A09YANA	608	1	72	2	3	RFD	81730	1.2129	mg/g	Lucerne Dehydrator 5/10 - 13/10	NA	NA	81730	NA	1	1		W9A09YANA_RFD	YANA
1694	WW19127	115180	2009	1926	6	8	21	W9A09YANA	694	8	44	1	2	RFD	81731	1.2576	mg/g	Lucerne Dehydrator 5/10 - 13/10	NA	NA	81731	NA	1	1		W9A09YANA_RFD	YANA
1695	BARHAM	112554	2009	1308	6	8	22	W9A09COLE	48	19	114	2	4	RFD	81732	1.1257	mg/g	Lucerne Dehydrator 19/10	NA	NA	81732	NA	1	1		W9A09COLE_RFD	COLE
1696	HRZ04_0511	113423	2009	293	6	8	23	W9A09COLE	151	27	23	1	1	RFD	81733	2.3377	mg/g	Yanco Hurricane 20/10	NA	NA	81733	NA	1	1		W9A09COLE_RFD	COLE
1697	VW1190	114135	2009	358	6	8	24	W9A09COLE	447	33	15	1	1	RFD	81734	1.3682	mg/g	Yanco Hurricane 20/10	NA	NA	81734	NA	1	1		W9A09COLE_RFD	COLE
1698	HRZ06_0033	111535	2009	485	6	8	25	W9A09COLE	192	11	55	1	2	IRR	81735	0.95852	mg/g	Leeton Hurricane 20/10	NA	NA	81735	NA	1	1		W9A09COLE_IRR	COLE
1699	HRZ06_0270	114608	2009	2577	6	8	26	W9A09YANA	239	3	112	2	4	IRR	81736	1.1836	mg/g	Hurricane Dehydrator 13/10/09	NA	NA	81736	NA	1	1		W9A09YANA_IRR	YANA
1700	ATTILA	112583	2009	213	6	8	27	W9A09COLE	25	20	23	1	1	RFD	81737	1.5849	mg/g	Yanco Hurricane 20/10	NA	NA	81076	81737	1	2		W9A09COLE_RFD	COLE
1701	VS2177	116987	2009	2086	6	8	28	W9A09YANA	381	22	59	1	2	RFD	81738	1.1513	mg/g	Lucerne Dehydrator 5/10 - 13/10	NA	NA	81738	NA	1	1		W9A09YANA_RFD	YANA
1702	WW20068	112850	2009	609	6	8	29	W9A09COLE	753	22	50	1	2	IRR	81739	2.2144	mg/g	Leeton Hurricane 20/10	NA	NA	81739	NA	1	1		W9A09COLE_IRR	COLE
1703	WW18957	115941	2009	1997	6	8	30	W9A09YANA	689	14	37	1	2	RFD	81740	0.7233	mg/g	Lucerne Dehydrator then Leeton Farm 13/10/09	NA	NA	80159	81740	1	2		W9A09YANA_RFD	YANA
1704	SUN525D	111689	2009	866	6	9	1	W9A09COLE	354	12	89	2	3	IRR	81741	1.3735	mg/g	Lucerne Dehydrator 19/10	NA	NA	81741	NA	1	1		W9A09COLE_IRR	COLE
1705	VV2678	115528	2009	1609	6	9	2	W9A09YANA	408	11	8	1	1	IRR	81742	1.0474	mg/g	Lucerne Dehydrator 5/10 - 13/10	NA	NA	81742	NA	1	1		W9A09YANA_IRR	YANA
1706	HRZ05_0137	114644	2009	1519	6	9	3	W9A09YANA	174	4	20	1	1	IRR	81743	1.6391	mg/g	Lucerne Dehydrator 13/10/09	NA	NA	81743	NA	1	1		W9A09YANA_IRR	YANA
1707	WW19750	110291	2009	6	6	9	4	W9A09COLE	737	1	11	1	1	RFD	81744	1.65	mg/g	Yanco Hurricane 20/10	NA	NA	81744	NA	1	1		W9A09COLE_RFD	COLE
1708	TAMMARIN_ROCK	114378	2009	1479	6	9	5	W9A09YANA	375	2	10	1	1	IRR	81745	1.4821	mg/g	Lucerne Dehydrator 13/10/09	NA	NA	81745	NA	1	1		W9A09YANA_IRR	YANA
1709	WW20192	110873	2009	1149	6	9	6	W9A09COLE	757	5	113	2	4	RFD	81746	0.53531	mg/g	Lucerne Dehydrator 19/10	NA	NA	80027	81746	1	2		W9A09COLE_RFD	COLE
1710	HRZ06_0323	111768	2009	507	6	9	7	W9A09COLE	249	13	48	1	2	IRR	81747	0.8765	mg/g	Leeton Hurricane 20/10	NA	NA	81747	NA	1	1		W9A09COLE_IRR	COLE
1711	WW20667	114810	2009	1887	6	9	8	W9A09YANA	787	5	58	1	2	RFD	81748	1.524	mg/g	Lucerne Dehydrator 5/10 - 13/10	NA	NA	81748	NA	1	1		W9A09YANA_RFD	YANA
1712	VW0395	112162	2009	905	6	9	9	W9A09COLE	428	16	82	2	3	IRR	81749	1.1257	mg/g	Lucerne Dehydrator 19/10	NA	NA	80911	81749	1	2		W9A09COLE_IRR	COLE
1713	VW1174	114014	2009	347	6	9	10	W9A09COLE	445	32	14	1	1	RFD	81750	1.9017	mg/g	Yanco Hurricane 20/10	NA	NA	81750	NA	1	1		W9A09COLE_RFD	COLE
1714	LINCOLN	111852	2009	151	6	9	11	W9A09COLE	280	14	12	1	1	RFD	81751	1.925	mg/g	Lucerne Dehydrator 20/10	NA	NA	81751	NA	1	1		W9A09COLE_RFD	COLE
1715	HRZ04_0227	110748	2009	1138	6	9	12	W9A09COLE	130	4	108	2	4	RFD	81752	1.0394	mg/g	Lucerne Dehydrator 19/10	NA	NA	81292	81752	1	2		W9A09COLE_RFD	COLE
1716	HRZ03_0076	114719	2009	2228	6	9	13	W9A09YANA	103	4	95	2	3	RFD	81753	1.0797	mg/g	Lucerne Dehydrator 5/10 - 13/10	NA	NA	81753	NA	1	1		W9A09YANA_RFD	YANA
1717	SUN571B	113498	2009	1380	6	9	14	W9A09COLE	369	27	98	2	4	RFD	81754	1.5399	mg/g	Lucerne Dehydrator 19/10	NA	NA	81754	NA	1	1		W9A09COLE_RFD	COLE
1718	SENTINEL	113861	2009	1424	6	9	15	W9A09COLE	347	30	101	2	4	RFD	81755	2.5035	mg/g	Lucerne Dehydrator 19/10	NA	NA	81755	NA	1	1		W9A09COLE_RFD	COLE
1719	B1227E	111599	2009	1213	6	9	16	W9A09COLE	41	11	119	2	4	RFD	81756	1.3053	mg/g	Lucerne Dehydrator 19/10	NA	NA	81756	NA	1	1		W9A09COLE_RFD	COLE
1720	VT2474	116661	2009	2751	6	9	17	W9A09YANA	387	19	117	2	4	IRR	81757	1.6566	mg/g	Hurricane Dehydrator 13/10/09	NA	NA	81279	81757	1	2		W9A09YANA_IRR	YANA
1721	WW19513	112606	2009	586	6	9	18	W9A09COLE	707	20	46	1	2	IRR	81758	1.9343	mg/g	Leeton Hurricane 20/10	NA	NA	81758	NA	1	1		W9A09COLE_IRR	COLE
1722	WAGT022	112569	2009	209	6	9	19	W9A09COLE	525	20	9	1	1	RFD	81759	2.7076	mg/g	Yanco Hurricane 20/10	NA	NA	81759	NA	1	1		W9A09COLE_RFD	COLE
1723	VW3170	115773	2009	2668	6	9	20	W9A09YANA	486	12	125	2	4	IRR	81760	1.6041	mg/g	Hurricane Dehydrator 13/10/09	NA	NA	81760	NA	1	1		W9A09YANA_IRR	YANA
1724	GLADIUS	113500	2009	1381	6	9	21	W9A09COLE	77	27	100	2	4	RFD	81761	1.3791	mg/g	Lucerne Dehydrator 19/10	NA	NA	81218	81761	1	2		W9A09COLE_RFD	COLE
1725	ELLISON	112527	2009	936	6	9	22	W9A09COLE	67	19	87	2	3	IRR	81762	1.3431	mg/g	Yanco Hurricane 19/10	NA	NA	81762	NA	1	1		W9A09COLE_IRR	COLE
1726	WW18946	112534	2009	1296	6	9	23	W9A09COLE	687	19	94	2	4	RFD	81763	1.1766	mg/g	Lucerne Dehydrator 19/10	NA	NA	81763	NA	1	1		W9A09COLE_RFD	COLE
1727	RAC1418	114710	2009	2223	6	9	24	W9A09YANA	330	4	86	2	3	RFD	81764	0.67152	mg/g	Lucerne Dehydrator 5/10 - 13/10	NA	NA	81764	NA	1	1		W9A09YANA_RFD	YANA
1728	WW18049	113048	2009	251	6	9	25	W9A09COLE	626	24	8	1	1	RFD	81765	1.779	mg/g	Yanco Hurricane 20/10	NA	NA	81765	NA	1	1		W9A09COLE_RFD	COLE
1729	HRZ06_0055	112834	2009	598	6	9	26	W9A09COLE	206	22	34	1	2	IRR	81766	1.3347	mg/g	Leeton Hurricane 20/10	NA	NA	80530	81766	1	2		W9A09COLE_IRR	COLE
1730	WW19365	117285	2009	2816	6	9	27	W9A09YANA	700	24	101	2	4	IRR	81767	1.679	mg/g	Hurricane Dehydrator 13/10/09	NA	NA	81767	NA	1	1		W9A09YANA_IRR	YANA
1731	WW20680	116755	2009	2420	6	9	28	W9A09YANA	789	20	83	2	3	RFD	81768	0.95827	mg/g	Lucerne Dehydrator 5/10 - 13/10	NA	NA	81768	NA	1	1		W9A09YANA_RFD	YANA
1732	HRZ05_0130	111609	2009	124	6	9	29	W9A09COLE	170	12	9	1	1	RFD	81769	2.3864	mg/g	Lucerne Dehydrator 20/10	NA	NA	81323	81769	1	2		W9A09COLE_RFD	COLE
1733	118849_303	115085	2009	2257	6	9	30	W9A09YANA	3	7	77	2	3	RFD	81770	1.4425	mg/g	Lucerne Dehydrator 5/10 - 13/10	NA	NA	81770	NA	1	1		W9A09YANA_RFD	YANA
1734	WW19864	117026	2009	2787	6	10	1	W9A09YANA	741	22	98	2	4	IRR	81771	1.7793	mg/g	Hurricane Dehydrator 13/10/09	NA	NA	81771	NA	1	1		W9A09YANA_IRR	YANA
1735	WW19754	116279	2009	2709	6	10	3	W9A09YANA	739	16	119	2	4	IRR	81773	1.4212	mg/g	Hurricane Dehydrator 13/10/09	NA	NA	81773	NA	1	1		W9A09YANA_IRR	YANA
1736	HRZ04_0111	114667	2009	1868	6	10	4	W9A09YANA	107	4	43	1	2	RFD	81774	1.4093	mg/g	Lucerne Dehydrator then Leeton Farm 13/10/09	NA	NA	80824	81774	1	2		W9A09YANA_RFD	YANA
1737	VW2843	112389	2009	921	6	10	5	W9A09COLE	483	18	69	2	3	IRR	81775	1.6529	mg/g	Yanco Hurricane 19/10	NA	NA	81775	NA	1	1		W9A09COLE_IRR	COLE
1738	QT13359	117727	2009	1795	6	10	6	W9A09YANA	313	28	31	1	1	IRR	81776	1.1155	mg/g	Lucerne Dehydrator 5/10 - 13/10	NA	NA	81776	NA	1	1		W9A09YANA_IRR	YANA
1739	HRZ04_0354	117602	2009	2135	6	10	7	W9A09YANA	142	27	34	1	2	RFD	81777	1.4607	mg/g	Lucerne Dehydrator then Leeton Farm 13/10/09	NA	NA	80741	81777	1	2		W9A09YANA_RFD	YANA
1740	WW20527	116363	2009	2374	6	10	8	W9A09YANA	772	17	75	2	3	RFD	81778	1.0812	mg/g	Lucerne Dehydrator 5/10 - 13/10	NA	NA	81778	NA	1	1		W9A09YANA_RFD	YANA
1741	HRZ04_0511	110501	2009	1109	6	10	9	W9A09COLE	151	2	101	2	4	RFD	81779	1.0035	mg/g	Lucerne Dehydrator 19/10	NA	NA	81779	NA	1	1		W9A09COLE_RFD	COLE
1742	EGA_EAGLEHAWK	113969	2009	1071	6	10	10	W9A09COLE	61	31	89	2	3	IRR	81780	1.1273	mg/g	Yanco Hurricane 19/10	NA	NA	81780	NA	1	1		W9A09COLE_IRR	COLE
1743	WW20192	113122	2009	986	6	10	11	W9A09COLE	757	24	82	2	3	IRR	81781	1.8477	mg/g	Yanco Hurricane 19/10	NA	NA	81781	NA	1	1		W9A09COLE_IRR	COLE
1744	WAGT025	115282	2009	1589	6	10	12	W9A09YANA	527	9	18	1	1	IRR	81782	1.7976	mg/g	Lucerne Dehydrator 13/10/09	NA	NA	81782	NA	1	1		W9A09YANA_IRR	YANA
1745	RAC1374	115969	2009	2335	6	10	13	W9A09YANA	324	14	65	2	3	RFD	81783	1.1126	mg/g	Lucerne Dehydrator then Leeton Farm 13/10/09	NA	NA	81487	81783	1	2		W9A09YANA_RFD	YANA
1746	LANG	114589	2009	2214	6	10	14	W9A09YANA	279	3	93	2	3	RFD	81784	1.2922	mg/g	Hurricane Dehydrator 13/10/09	NA	NA	81784	NA	1	1		W9A09YANA_RFD	YANA
1747	WW20383	115936	2009	1667	6	10	15	W9A09YANA	765	14	32	1	1	IRR	81785	1.4431	mg/g	Hurricane Dehydrator 13/10/09	NA	NA	81785	NA	1	1		W9A09YANA_IRR	YANA
1748	HRZ06_0299	114145	2009	362	6	10	16	W9A09COLE	244	33	25	1	1	RFD	81786	1.8274	mg/g	Yanco Hurricane 20/10	NA	NA	81786	NA	1	1		W9A09COLE_RFD	COLE
1749	H45	115653	2009	1623	6	10	17	W9A09YANA	79	12	5	1	1	IRR	81787	1.7271	mg/g	Lucerne Dehydrator 5/10 - 13/10	NA	NA	81787	NA	1	1		W9A09YANA_IRR	YANA
1750	VW1193	117417	2009	2830	6	10	18	W9A09YANA	449	25	105	2	4	IRR	81788	1.5682	mg/g	Hurricane Dehydrator 13/10/09	NA	NA	80056	81788	1	2		W9A09YANA_IRR	YANA
1751	VW4192	116371	2009	2379	6	10	19	W9A09YANA	518	17	83	2	3	RFD	81789	1.2478	mg/g	Lucerne Dehydrator then Leeton Farm 13/10/09	NA	NA	81789	NA	1	1		W9A09YANA_RFD	YANA
1752	B1227E	111288	2009	459	6	10	20	W9A09COLE	41	9	48	1	2	IRR	81790	0.84612	mg/g	Leeton Hurricane 20/10	NA	NA	81790	NA	1	1		W9A09COLE_IRR	COLE
1753	VW3397	116531	2009	2736	6	10	21	W9A09YANA	490	18	115	2	4	IRR	81791	1.5255	mg/g	Hurricane Dehydrator 13/10/09	NA	NA	81791	NA	1	1		W9A09YANA_IRR	YANA
1754	HRZ06_0034	117321	2009	1763	6	10	22	W9A09YANA	193	25	9	1	1	IRR	81792	1.1287	mg/g	Lucerne Dehydrator 5/10 - 13/10	NA	NA	81792	NA	1	1		W9A09YANA_IRR	YANA
1755	HRZ05_0101	110726	2009	770	6	10	23	W9A09COLE	161	4	86	2	3	IRR	81793	1.6912	mg/g	Yanco Hurricane 19/10	NA	NA	81793	NA	1	1		W9A09COLE_IRR	COLE
1756	VW3717	113734	2009	1403	6	10	24	W9A09COLE	509	29	94	2	4	RFD	81794	1.6328	mg/g	Lucerne Dehydrator 19/10	NA	NA	81332	81794	1	2		W9A09COLE_RFD	COLE
1757	WW19864	112536	2009	1298	6	10	25	W9A09COLE	741	19	96	2	4	RFD	81795	1.2088	mg/g	Lucerne Dehydrator 19/10	NA	NA	81795	NA	1	1		W9A09COLE_RFD	COLE
1758	SERI_DWARF	113367	2009	1007	6	10	26	W9A09COLE	348	26	87	2	3	IRR	81796	2.4509	mg/g	Yanco Hurricane 19/10	NA	NA	81796	NA	1	1		W9A09COLE_IRR	COLE
1759	SUN570D	110809	2009	406	6	10	27	W9A09COLE	368	5	49	1	2	IRR	81797	1.2211	mg/g	Leeton Hurricane 20/10	NA	NA	81797	NA	1	1		W9A09COLE_IRR	COLE
1760	WYUNA	116124	2009	2360	6	10	28	W9A09YANA	839	15	92	2	3	RFD	81798	1.1693	mg/g	Lucerne Dehydrator then Leeton Farm 13/10/09	NA	NA	81057	81798	1	2		W9A09YANA_RFD	YANA
1761	MCCUBBIN	114045	2009	712	6	10	29	W9A09COLE	296	32	45	1	2	IRR	81799	1.392	mg/g	Leeton Hurricane 20/10	NA	NA	81799	NA	1	1		W9A09COLE_IRR	COLE
1762	WW19684	115923	2009	1662	6	10	30	W9A09YANA	731	14	19	1	1	IRR	81800	1.4701	mg/g	Hurricane Dehydrator 13/10/09	NA	NA	81800	NA	1	1		W9A09YANA_IRR	YANA
1763	VW4076	113204	2009	639	7	1	1	W9A09COLE	517	25	44	1	2	IRR	81801	1.4067	mg/g	Leeton Hurricane 20/10	NA	NA	81801	NA	1	1		W9A09COLE_IRR	COLE
1764	114892_109	117036	2009	2793	7	1	2	W9A09YANA	2	22	108	2	4	IRR	81802	1.7456	mg/g	Hurricane Dehydrator 13/10/09	NA	NA	81802	NA	1	1		W9A09YANA_IRR	YANA
1765	WW20406	116382	2009	2385	7	1	3	W9A09YANA	767	17	94	2	3	RFD	81803	0.88036	mg/g	Lucerne Dehydrator 5/10 - 13/10	NA	NA	81803	NA	1	1		W9A09YANA_RFD	YANA
1766	VW1286	110445	2009	383	7	1	4	W9A09COLE	453	2	45	1	2	IRR	81804	1.5957	mg/g	Leeton Hurricane 20/10	NA	NA	81804	NA	1	1		W9A09COLE_IRR	COLE
1767	WW16917	111062	2009	797	7	1	5	W9A09COLE	611	7	62	2	3	IRR	81805	1.7723	mg/g	Lucerne Dehydrator 19/10	NA	NA	80308	81805	1	2		W9A09COLE_IRR	COLE
1768	TAMMARIN_ROCK	114025	2009	351	7	1	6	W9A09COLE	375	32	25	1	1	RFD	81806	1.5975	mg/g	Yanco Hurricane 20/10	NA	NA	81806	NA	1	1		W9A09COLE_RFD	COLE
1769	HRZ06_2087	116383	2009	2386	7	1	7	W9A09YANA	266	17	95	2	3	RFD	81807	0.89303	mg/g	Lucerne Dehydrator 5/10 - 13/10	NA	NA	81807	NA	1	1		W9A09YANA_RFD	YANA
1770	334609_1	114504	2009	1494	7	1	8	W9A09YANA	9	3	8	1	1	IRR	81808	1.4873	mg/g	Lucerne Dehydrator 13/10/09	NA	NA	81808	NA	1	1		W9A09YANA_IRR	YANA
1771	HRZ06_0491	114513	2009	1500	7	1	9	W9A09YANA	253	3	17	1	1	IRR	81809	1.9413	mg/g	Lucerne Dehydrator 13/10/09	NA	NA	81809	NA	1	1		W9A09YANA_IRR	YANA
1772	WW17062	110964	2009	794	7	1	10	W9A09COLE	612	6	84	2	3	IRR	81810	1.3586	mg/g	Lucerne Dehydrator 19/10	NA	NA	81616	81810	1	2		W9A09COLE_IRR	COLE
1773	VW0385	116437	2009	1711	7	1	11	W9A09YANA	426	18	21	1	1	IRR	81811	0.95433	mg/g	Lucerne Dehydrator 5/10 - 13/10	NA	NA	81811	NA	1	1		W9A09YANA_IRR	YANA
1774	HRZ04_0531	115556	2009	1958	7	1	12	W9A09YANA	156	11	36	1	2	RFD	81812	1.4575	mg/g	Lucerne Dehydrator then Leeton Farm 13/10/09	NA	NA	81812	NA	1	1		W9A09YANA_RFD	YANA
1775	WW20406	110869	2009	1147	7	1	13	W9A09COLE	767	5	109	2	4	RFD	81813	0.60205	mg/g	Lucerne Dehydrator 19/10	NA	NA	81813	NA	1	1		W9A09COLE_RFD	COLE
1776	ROSELLA	110761	2009	52	7	1	14	W9A09COLE	346	5	1	1	1	RFD	81814	1.4947	mg/g	Yanco Hurricane 20/10	NA	NA	81814	NA	1	1		W9A09COLE_RFD	COLE
1777	WW19365	112006	2009	530	7	1	15	W9A09COLE	700	15	46	1	2	IRR	81815	1.5042	mg/g	Leeton Hurricane 20/10	NA	NA	81350	81815	1	2		W9A09COLE_IRR	COLE
1778	VW2405	116722	2009	2063	7	1	16	W9A09YANA	474	20	50	1	2	RFD	81816	1.4677	mg/g	Lucerne Dehydrator then Leeton Farm 13/10/09	NA	NA	81816	NA	1	1		W9A09YANA_RFD	YANA
1779	VW0318	110545	2009	34	7	1	17	W9A09COLE	423	3	25	1	1	RFD	81817	1.9327	mg/g	Yanco Hurricane 20/10	NA	NA	81817	NA	1	1		W9A09COLE_RFD	COLE
1780	WI25099	115219	2009	2272	7	1	18	W9A09YANA	557	8	83	2	3	RFD	81818	1.1482	mg/g	Lucerne Dehydrator 5/10 - 13/10	NA	NA	81818	NA	1	1		W9A09YANA_RFD	YANA
1781	GBA0608	115665	2009	1630	7	1	19	W9A09YANA	73	12	17	1	1	IRR	81819	1.299	mg/g	Hurricane Dehydrator 13/10/09	NA	NA	81819	NA	1	1		W9A09YANA_IRR	YANA
1782	WW16259	116542	2009	2741	7	1	20	W9A09YANA	603	18	126	2	4	IRR	81820	1.1662	mg/g	Hurricane Dehydrator 13/10/09	NA	NA	80940	81820	1	2		W9A09YANA_IRR	YANA
1783	SUNVALE	116205	2009	2019	7	1	21	W9A09YANA	373	16	45	1	2	RFD	81821	1.4596	mg/g	Lucerne Dehydrator 5/10 - 13/10	NA	NA	81821	NA	1	1		W9A09YANA_RFD	YANA
1784	VW0398	112231	2009	545	7	1	22	W9A09COLE	429	17	31	1	2	IRR	81822	1.057	mg/g	Leeton Hurricane 20/10	NA	NA	81822	NA	1	1		W9A09COLE_IRR	COLE
1785	WW18049	113079	2009	627	7	1	23	W9A09COLE	626	24	39	1	2	IRR	81823	1.2077	mg/g	Leeton Hurricane 20/10	NA	NA	80275	81823	1	2		W9A09COLE_IRR	COLE
1786	AUS33585	116311	2009	1698	7	1	24	W9A09YANA	35	17	23	1	1	IRR	81824	1.1711	mg/g	Lucerne Dehydrator 5/10 - 13/10	NA	NA	81824	NA	1	1		W9A09YANA_IRR	YANA
1787	VW2426	116846	2009	2069	7	1	25	W9A09YANA	476	21	46	1	2	RFD	81825	1.1201	mg/g	Lucerne Dehydrator 5/10 - 13/10	NA	NA	81825	NA	1	1		W9A09YANA_RFD	YANA
1788	RAC1418	110767	2009	56	7	1	26	W9A09COLE	330	5	7	1	1	RFD	81826	1.8162	mg/g	Yanco Hurricane 20/10	NA	NA	81826	NA	1	1		W9A09COLE_RFD	COLE
1789	AUS33697	115019	2009	1558	7	1	27	W9A09YANA	38	7	11	1	1	IRR	81827	1.4456	mg/g	Lucerne Dehydrator 5/10 - 13/10	NA	NA	80436	81827	1	2		W9A09YANA_IRR	YANA
1790	VW1498	111139	2009	89	7	1	28	W9A09COLE	455	8	19	1	1	RFD	81828	1.7247	mg/g	Lucerne Dehydrator 20/10	NA	NA	81828	NA	1	1		W9A09COLE_RFD	COLE
1791	H45	116658	2009	2750	7	1	29	W9A09YANA	79	19	114	2	4	IRR	81829	1.9491	mg/g	Hurricane Dehydrator 13/10/09	NA	NA	81829	NA	1	1		W9A09YANA_IRR	YANA
1792	QT13375	115354	2009	2284	7	1	30	W9A09YANA	315	9	90	2	3	RFD	81830	1.5312	mg/g	Lucerne Dehydrator 5/10 - 13/10	NA	NA	81830	NA	1	1		W9A09YANA_RFD	YANA
1793	HRZ06_0145	111295	2009	462	7	2	2	W9A09COLE	223	9	55	1	2	IRR	81832	1.4859	mg/g	Leeton Hurricane 20/10	NA	NA	80784	81832	1	2		W9A09COLE_IRR	COLE
1794	HRZ06_0075	117855	2009	1809	7	2	3	W9A09YANA	216	29	31	1	1	IRR	81833	1.5295	mg/g	Lucerne Dehydrator 5/10 - 13/10	NA	NA	81833	NA	1	1		W9A09YANA_IRR	YANA
1795	HRZ04_0206	114075	2009	1076	7	2	4	W9A09COLE	128	32	75	2	3	IRR	81834	2.2704	mg/g	Yanco Hurricane 19/10	NA	NA	81834	NA	1	1		W9A09COLE_IRR	COLE
1796	VW3195	110605	2009	758	7	2	5	W9A09COLE	488	3	85	2	3	IRR	81835	1.8684	mg/g	Lucerne Dehydrator 19/10	NA	NA	81835	NA	1	1		W9A09COLE_IRR	COLE
1797	VV2401	117627	2009	2143	7	2	6	W9A09YANA	407	27	59	1	2	RFD	81836	1.2842	mg/g	Lucerne Dehydrator 5/10 - 13/10	NA	NA	81836	NA	1	1		W9A09YANA_RFD	YANA
1798	QT13354	115531	2009	1611	7	2	7	W9A09YANA	312	11	11	1	1	IRR	81837	1.8872	mg/g	Lucerne Dehydrator 5/10 - 13/10	NA	NA	81837	NA	1	1		W9A09YANA_IRR	YANA
1799	HRZ06_0488	115406	2009	1599	7	2	8	W9A09YANA	252	10	14	1	1	IRR	81838	1.8923	mg/g	Lucerne Dehydrator 5/10 - 13/10	NA	NA	81081	81838	1	2		W9A09YANA_IRR	YANA
1800	WW18569	116507	2009	2396	7	2	9	W9A09YANA	664	18	91	2	3	RFD	81839	0.65969	mg/g	Lucerne Dehydrator 5/10 - 13/10	NA	NA	81839	NA	1	1		W9A09YANA_RFD	YANA
1801	VW4192	112468	2009	206	7	2	10	W9A09COLE	518	19	28	1	1	RFD	81840	1.9158	mg/g	Lucerne Dehydrator 20/10	NA	NA	81840	NA	1	1		W9A09COLE_RFD	COLE
1802	EGA_EAGLEHAWK	113660	2009	313	7	2	11	W9A09COLE	61	29	20	1	1	RFD	81841	2.5051	mg/g	Yanco Hurricane 20/10	NA	NA	81841	NA	1	1		W9A09COLE_RFD	COLE
1803	VW3174	115575	2009	1968	7	2	12	W9A09YANA	487	11	55	1	2	RFD	81842	0.99169	mg/g	Lucerne Dehydrator then Leeton Farm 13/10/09	NA	NA	81131	81842	1	2		W9A09YANA_RFD	YANA
1804	BARHAM	118145	2009	2542	7	2	13	W9A09YANA	48	31	65	2	3	RFD	81843	0.94299	mg/g	Lucerne Dehydrator 5/10 - 13/10	NA	NA	81843	NA	1	1		W9A09YANA_RFD	YANA
1805	HRZ06_2178	117548	2009	2847	7	2	14	W9A09YANA	272	26	108	2	4	IRR	81844	1.6883	mg/g	Hurricane Dehydrator 13/10/09	NA	NA	81844	NA	1	1		W9A09YANA_IRR	YANA
1806	LINCOLN	113483	2009	1021	7	2	15	W9A09COLE	280	27	83	2	3	IRR	81845	2.1028	mg/g	Yanco Hurricane 19/10	NA	NA	81845	NA	1	1		W9A09COLE_IRR	COLE
1807	VW0395	113634	2009	1398	7	2	16	W9A09COLE	428	28	114	2	4	RFD	81846	1.6069	mg/g	Lucerne Dehydrator 19/10	NA	NA	81846	NA	1	1		W9A09COLE_RFD	COLE
1808	VW0720	111169	2009	445	7	2	17	W9A09COLE	434	8	49	1	2	IRR	81847	1.4676	mg/g	Leeton Hurricane 20/10	NA	NA	81298	81847	1	2		W9A09COLE_IRR	COLE
1809	HRZ06_0488	114991	2009	2601	7	2	18	W9A09YANA	252	6	111	2	4	IRR	81848	2.1532	mg/g	Hurricane Dehydrator 13/10/09	NA	NA	81848	NA	1	1		W9A09YANA_IRR	YANA
1810	QT12844	116597	2009	2053	7	2	19	W9A09YANA	307	19	53	1	2	RFD	81849	1.5081	mg/g	Lucerne Dehydrator then Leeton Farm 13/10/09	NA	NA	81849	NA	1	1		W9A09YANA_RFD	YANA
1811	WW21573	111728	2009	137	7	2	20	W9A09COLE	825	13	8	1	1	RFD	81850	1.8683	mg/g	Lucerne Dehydrator 20/10	NA	NA	81850	NA	1	1	W9A08COLE	W9A09COLE_RFD	COLE
1812	WW19665	110381	2009	1098	7	2	21	W9A09COLE	728	1	101	2	4	RFD	81851	1.2172	mg/g	Lucerne Dehydrator 19/10	NA	NA	81851	NA	1	1		W9A09COLE_RFD	COLE
1813	LPB04_2324	112136	2009	543	7	2	22	W9A09COLE	287	16	56	1	2	IRR	81852	1.7174	mg/g	Leeton Hurricane 20/10	NA	NA	81648	81852	1	2		W9A09COLE_IRR	COLE
1814	WW19665	117250	2009	2456	7	2	23	W9A09YANA	728	24	66	2	3	RFD	81853	0.9382	mg/g	Lucerne Dehydrator then Leeton Farm 13/10/09	NA	NA	81853	NA	1	1		W9A09YANA_RFD	YANA
1815	VW4076	112205	2009	177	7	2	24	W9A09COLE	517	17	5	1	1	RFD	81854	2.5185	mg/g	Lucerne Dehydrator 20/10	NA	NA	81854	NA	1	1		W9A09COLE_RFD	COLE
1816	WW19562	117531	2009	2489	7	2	25	W9A09YANA	712	26	91	2	3	RFD	81855	1.0359	mg/g	Lucerne Dehydrator 5/10 - 13/10	NA	NA	80836	81855	1	2		W9A09YANA_RFD	YANA
1817	VV3277	115512	2009	2643	7	2	26	W9A09YANA	412	10	120	2	4	IRR	81856	1.6085	mg/g	Hurricane Dehydrator 13/10/09	NA	NA	81856	NA	1	1		W9A09YANA_IRR	YANA
1818	ZEBU	115957	2009	2001	7	2	27	W9A09YANA	841	14	53	1	2	RFD	81857	1.1119	mg/g	Lucerne Dehydrator 5/10 - 13/10	NA	NA	81857	NA	1	1		W9A09YANA_RFD	YANA
1819	VU3750	112959	2009	619	7	2	28	W9A09COLE	393	23	39	1	2	IRR	81858	2.0877	mg/g	Leeton Hurricane 20/10	NA	NA	81858	NA	1	1		W9A09COLE_IRR	COLE
1820	WEEBILL1	110318	2009	370	7	2	29	W9A09COLE	550	1	38	1	2	IRR	81859	1.8118	mg/g	Leeton Hurricane 20/10	NA	NA	81859	NA	1	1		W9A09COLE_IRR	COLE
1821	VW0823	113292	2009	275	7	2	30	W9A09COLE	439	26	12	1	1	RFD	81860	2.2986	mg/g	Yanco Hurricane 20/10	NA	NA	81860	NA	1	1		W9A09COLE_RFD	COLE
1822	WW19884	115748	2009	2660	7	3	1	W9A09YANA	745	12	100	2	4	IRR	81861	1.1916	mg/g	Hurricane Dehydrator 13/10/09	NA	NA	81861	NA	1	1		W9A09YANA_IRR	YANA
1823	HRZ03_0061	112904	2009	1342	7	3	2	W9A09COLE	97	22	104	2	4	RFD	81862	1.8865	mg/g	Lucerne Dehydrator 19/10	NA	NA	81862	NA	1	1		W9A09COLE_RFD	COLE
1824	VW0760	113461	2009	1010	7	3	3	W9A09COLE	436	27	61	2	3	IRR	81863	2.1475	mg/g	Yanco Hurricane 19/10	NA	NA	81863	NA	1	1		W9A09COLE_IRR	COLE
1825	WYUNA	111558	2009	846	7	3	4	W9A09COLE	839	11	78	2	3	IRR	81864	1.2172	mg/g	Lucerne Dehydrator 19/10	NA	NA	81864	NA	1	1		W9A09COLE_IRR	COLE
1826	HRZ04_0425	114561	2009	2207	7	3	5	W9A09YANA	148	3	65	2	3	RFD	81865	1.5919	mg/g	Lucerne Dehydrator 5/10 - 13/10	NA	NA	81865	NA	1	1		W9A09YANA_RFD	YANA
1827	HRZ04_0206	116359	2009	2372	7	3	6	W9A09YANA	128	17	71	2	3	RFD	81866	1.0087	mg/g	Lucerne Dehydrator 5/10 - 13/10	NA	NA	81866	NA	1	1		W9A09YANA_RFD	YANA
1828	H45	117276	2009	2466	7	3	7	W9A09YANA	79	24	92	2	3	RFD	81867	1.2988	mg/g	Lucerne Dehydrator then Leeton Farm 13/10/09	NA	NA	80656	81867	1	2		W9A09YANA_RFD	YANA
1829	QT13359	111431	2009	833	7	3	8	W9A09COLE	313	10	71	2	3	IRR	81868	1.8083	mg/g	Lucerne Dehydrator 19/10	NA	NA	81868	NA	1	1		W9A09COLE_IRR	COLE
1830	WW19660	114259	2009	1468	7	3	9	W9A09YANA	724	1	19	1	1	IRR	81869	1.2843	mg/g	Lucerne Dehydrator 5/10 - 13/10	NA	NA	81869	NA	1	1		W9A09YANA_IRR	YANA
1831	AUS33467	117496	2009	2129	7	3	10	W9A09YANA	28	26	56	1	2	RFD	81870	2.2306	mg/g	Lucerne Dehydrator 5/10 - 13/10	NA	NA	81870	NA	1	1		W9A09YANA_RFD	YANA
1832	VW1286	116584	2009	2045	7	3	11	W9A09YANA	453	19	40	1	2	RFD	81871	1.0825	mg/g	Lucerne Dehydrator 5/10 - 13/10	NA	NA	81871	NA	1	1		W9A09YANA_RFD	YANA
1833	BOLAC	113448	2009	663	7	3	12	W9A09COLE	49	27	48	1	2	IRR	81872	1.1528	mg/g	Leeton Hurricane 20/10	NA	NA	81872	NA	1	1		W9A09COLE_IRR	COLE
1834	ROSELLA	117780	2009	2511	7	3	13	W9A09YANA	346	28	84	2	3	RFD	81873	1.5512	mg/g	Lucerne Dehydrator then Leeton Farm 13/10/09	NA	NA	81873	NA	1	1		W9A09YANA_RFD	YANA
1835	HRZ06_0292	114447	2009	2203	7	3	14	W9A09YANA	243	2	79	2	3	RFD	81874	1.3901	mg/g	Lucerne Dehydrator 5/10 - 13/10	NA	NA	81485	81874	1	2		W9A09YANA_RFD	YANA
1836	WW20159	110378	2009	1096	7	3	15	W9A09COLE	756	1	98	2	4	RFD	81875	1.1288	mg/g	Lucerne Dehydrator 19/10	NA	NA	81875	NA	1	1		W9A09COLE_RFD	COLE
1837	LPB04_2386_1302	111395	2009	466	7	3	16	W9A09COLE	291	10	35	1	2	IRR	81876	2.008	mg/g	Leeton Hurricane 20/10	NA	NA	81024	81876	1	2		W9A09COLE_IRR	COLE
1838	VW3398	118205	2009	2920	7	3	17	W9A09YANA	491	31	125	2	4	IRR	81877	1.6824	mg/g	Hurricane Dehydrator 13/10/09	NA	NA	81877	NA	1	1		W9A09YANA_IRR	YANA
1839	HRZ06_0055	117704	2009	1788	7	3	18	W9A09YANA	206	28	8	1	1	IRR	81878	1.5644	mg/g	Lucerne Dehydrator 5/10 - 13/10	NA	NA	81878	NA	1	1		W9A09YANA_IRR	YANA
1840	WW19754	117859	2009	2157	7	3	19	W9A09YANA	739	29	35	1	2	RFD	81879	1.4871	mg/g	Lucerne Dehydrator 5/10 - 13/10	NA	NA	80969	81879	1	2		W9A09YANA_RFD	YANA
1841	QT13375	115177	2009	1923	7	3	20	W9A09YANA	315	8	41	1	2	RFD	81880	2.0795	mg/g	Lucerne Dehydrator then Leeton Farm 13/10/09	NA	NA	81880	NA	1	1		W9A09YANA_RFD	YANA
1842	LPB04_2351	116413	2009	2728	7	3	21	W9A09YANA	288	17	125	2	4	IRR	81881	1.6475	mg/g	Hurricane Dehydrator 13/10/09	NA	NA	80110	81881	1	2		W9A09YANA_IRR	YANA
1843	VW0373	110701	2009	760	7	3	22	W9A09COLE	424	4	61	2	3	IRR	81882	2.0446	mg/g	Yanco Hurricane 19/10	NA	NA	81882	NA	1	1		W9A09COLE_IRR	COLE
1844	VW0379	115104	2009	2262	7	3	23	W9A09YANA	425	7	96	2	3	RFD	81883	0.92146	mg/g	Lucerne Dehydrator 5/10 - 13/10	NA	NA	81883	NA	1	1		W9A09YANA_RFD	YANA
1845	VW0857	110974	2009	1154	7	3	24	W9A09COLE	440	6	94	2	4	RFD	81884	1.0955	mg/g	Lucerne Dehydrator 19/10	NA	NA	81884	NA	1	1		W9A09COLE_RFD	COLE
1846	VT1155	115678	2009	1639	7	3	25	W9A09YANA	384	12	30	1	1	IRR	81885	0.9785	mg/g	Hurricane Dehydrator 13/10/09	NA	NA	81885	NA	1	1		W9A09YANA_IRR	YANA
1847	VW2705	110592	2009	754	7	3	26	W9A09COLE	480	3	72	2	3	IRR	81886	2.4202	mg/g	Lucerne Dehydrator 19/10	NA	NA	80802	81886	1	2		W9A09COLE_IRR	COLE
1848	RAC1502	113752	2009	1411	7	3	27	W9A09COLE	342	29	112	2	4	RFD	81887	1.6582	mg/g	Lucerne Dehydrator 19/10	NA	NA	81887	NA	1	1		W9A09COLE_RFD	COLE
1849	HRZ06_0323	114817	2009	2230	7	3	28	W9A09YANA	249	5	65	2	3	RFD	81888	1.1571	mg/g	Lucerne Dehydrator 5/10 - 13/10	NA	NA	81888	NA	1	1		W9A09YANA_RFD	YANA
1850	VW2405	115268	2009	1586	7	3	29	W9A09YANA	474	9	4	1	1	IRR	81889	1.3441	mg/g	Lucerne Dehydrator 5/10 - 13/10	NA	NA	80040	81889	1	2		W9A09YANA_IRR	YANA
1851	IRENA/BABAX//PASTOR	113878	2009	1429	7	3	30	W9A09COLE	277	30	118	2	4	RFD	81890	2.5067	mg/g	Lucerne Dehydrator 19/10	NA	NA	81890	NA	1	1		W9A09COLE_RFD	COLE
1852	WW19660	110619	2009	1119	7	4	1	W9A09COLE	724	3	99	2	4	RFD	81891	1.4687	mg/g	Lucerne Dehydrator 19/10	NA	NA	81891	NA	1	1		W9A09COLE_RFD	COLE
1853	WW13735	113825	2009	1053	7	4	2	W9A09COLE	568	30	65	2	3	IRR	81892	2.6468	mg/g	Yanco Hurricane 19/10	NA	NA	81892	NA	1	1		W9A09COLE_IRR	COLE
1854	CHARA	111795	2009	870	7	4	3	W9A09COLE	52	13	75	2	3	IRR	81893	1.8285	mg/g	Lucerne Dehydrator 19/10	NA	NA	80935	81893	1	2		W9A09COLE_IRR	COLE
1855	WW20527	111497	2009	120	7	4	4	W9A09COLE	772	11	17	1	1	RFD	81894	1.9087	mg/g	Lucerne Dehydrator 20/10	NA	NA	81894	NA	1	1		W9A09COLE_RFD	COLE
1856	HRZ05_0137	113393	2009	1374	7	4	5	W9A09COLE	174	26	113	2	4	RFD	81895	1.2007	mg/g	Leeton Hurricane 20/10	NA	NA	81895	NA	1	1		W9A09COLE_RFD	COLE
1857	WW19473	117371	2009	2116	7	4	6	W9A09YANA	703	25	59	1	2	RFD	81896	1.3842	mg/g	Lucerne Dehydrator 5/10 - 13/10	NA	NA	80546	81896	1	2		W9A09YANA_RFD	YANA
1858	HRZ06_0004	111427	2009	830	7	4	7	W9A09COLE	190	10	67	2	3	IRR	81897	1.5917	mg/g	Lucerne Dehydrator 19/10	NA	NA	81897	NA	1	1		W9A09COLE_IRR	COLE
1859	VV2678	118187	2009	2913	7	4	8	W9A09YANA	408	31	107	2	4	IRR	81898	1.5309	mg/g	Hurricane Dehydrator 13/10/09	NA	NA	81898	NA	1	1		W9A09YANA_IRR	YANA
1860	WW20571	113427	2009	295	7	4	9	W9A09COLE	775	27	27	1	1	RFD	81899	2.0043	mg/g	Yanco Hurricane 20/10	NA	NA	80356	81899	1	2		W9A09COLE_RFD	COLE
1861	WW13602	117027	2009	2788	7	4	10	W9A09YANA	566	22	99	2	4	IRR	81900	1.7052	mg/g	Hurricane Dehydrator 13/10/09	NA	NA	81900	NA	1	1		W9A09YANA_IRR	YANA
1862	WW20652	116432	2009	1709	7	4	11	W9A09YANA	784	18	16	1	1	IRR	81901	1.1051	mg/g	Lucerne Dehydrator 5/10 - 13/10	NA	NA	80066	81901	1	2		W9A09YANA_IRR	YANA
1863	VW0779	112575	2009	210	7	4	12	W9A09COLE	437	20	15	1	1	RFD	81902	2.0582	mg/g	Yanco Hurricane 20/10	NA	NA	81902	NA	1	1		W9A09COLE_RFD	COLE
1864	WAWHT3016	113217	2009	645	7	4	13	W9A09COLE	545	25	57	1	2	IRR	81903	1.8968	mg/g	Leeton Hurricane 20/10	NA	NA	81903	NA	1	1		W9A09COLE_IRR	COLE
1865	SUNBRI	117694	2009	2864	7	4	14	W9A09YANA	372	27	126	2	4	IRR	81904	1.3462	mg/g	Hurricane Dehydrator 13/10/09	NA	NA	81904	NA	1	1		W9A09YANA_IRR	YANA
1866	RAC1418	112187	2009	1266	7	4	15	W9A09COLE	330	16	107	2	4	RFD	81905	1.5354	mg/g	Lucerne Dehydrator 19/10	NA	NA	81905	NA	1	1		W9A09COLE_RFD	COLE
1867	WAGT019	110295	2009	8	7	4	16	W9A09COLE	523	1	15	1	1	RFD	81906	1.2157	mg/g	Yanco Hurricane 20/10	NA	NA	81906	NA	1	1		W9A09COLE_RFD	COLE
1868	HRZ05_0283	116042	2009	1673	7	4	17	W9A09YANA	189	15	10	1	1	IRR	81907	1.6641	mg/g	Lucerne Dehydrator 5/10 - 13/10	NA	NA	81907	NA	1	1		W9A09YANA_IRR	YANA
1869	HRZ06_0033	112946	2009	244	7	4	18	W9A09COLE	192	23	26	1	1	RFD	81908	1.8396	mg/g	Yanco Hurricane 20/10	NA	NA	81580	81908	1	2		W9A09COLE_RFD	COLE
1870	VW1194	115973	2009	2338	7	4	19	W9A09YANA	450	14	69	2	3	RFD	81909	0.74421	mg/g	Lucerne Dehydrator then Leeton Farm 13/10/09	NA	NA	81909	NA	1	1		W9A09YANA_RFD	YANA
1871	DERRIMUT	112604	2009	585	7	4	20	W9A09COLE	57	20	44	1	2	IRR	81910	2.0655	mg/g	Leeton Hurricane 20/10	NA	NA	81910	NA	1	1		W9A09COLE_IRR	COLE
1872	HRZ06_2202	117463	2009	1770	7	4	21	W9A09YANA	274	26	23	1	1	IRR	81911	1.7604	mg/g	Lucerne Dehydrator 5/10 - 13/10	NA	NA	81911	NA	1	1		W9A09YANA_IRR	YANA
1873	HRZ04_0111	116512	2009	2400	7	4	22	W9A09YANA	107	18	96	2	3	RFD	81912	1.2604	mg/g	Lucerne Dehydrator 5/10 - 13/10	NA	NA	81912	NA	1	1		W9A09YANA_RFD	YANA
1874	VW2092	114983	2009	2598	7	4	23	W9A09YANA	463	6	103	2	4	IRR	81913	1.6079	mg/g	Hurricane Dehydrator 13/10/09	NA	NA	81913	NA	1	1		W9A09YANA_IRR	YANA
1875	VENTURA	116302	2009	1696	7	4	24	W9A09YANA	376	17	14	1	1	IRR	81914	1.6776	mg/g	Lucerne Dehydrator 5/10 - 13/10	NA	NA	80017	81914	1	2		W9A09YANA_IRR	YANA
1876	HRZ06_0004	114344	2009	2559	7	4	25	W9A09YANA	190	1	104	2	4	IRR	81915	1.5966	mg/g	Hurricane Dehydrator 13/10/09	NA	NA	81915	NA	1	1		W9A09YANA_IRR	YANA
1877	HRZ05_0132	112829	2009	232	7	4	26	W9A09COLE	172	22	29	1	1	RFD	81916	2.331	mg/g	Yanco Hurricane 20/10	NA	NA	81916	NA	1	1		W9A09COLE_RFD	COLE
1878	WW21873	113502	2009	1382	7	4	27	W9A09COLE	832	27	102	2	4	RFD	81917	1.1549	mg/g	Lucerne Dehydrator 19/10	NA	NA	81917	NA	1	1		W9A09COLE_RFD	COLE
1879	WW21843	114811	2009	1888	7	4	28	W9A09YANA	830	5	59	1	2	RFD	81918	1.4093	mg/g	Hurricane Dehydrator 13/10/09	NA	NA	81102	81918	1	2		W9A09YANA_RFD	YANA
1880	334609_1	110843	2009	782	7	4	29	W9A09COLE	9	5	83	2	3	IRR	81919	1.2384	mg/g	Lucerne Dehydrator 19/10	NA	NA	81919	NA	1	1		W9A09COLE_IRR	COLE
1881	VW2843	117817	2009	2872	7	4	30	W9A09YANA	483	28	121	2	4	IRR	81920	1.2842	mg/g	Hurricane Dehydrator 13/10/09	NA	NA	81920	NA	1	1		W9A09YANA_IRR	YANA
1882	VW3195	111099	2009	1170	7	5	1	W9A09COLE	488	7	99	2	4	RFD	81921	1.4347	mg/g	Lucerne Dehydrator 19/10	NA	NA	81921	NA	1	1		W9A09COLE_RFD	COLE
1883	HRZ06_0067	114405	2009	1837	7	5	2	W9A09YANA	213	2	37	1	2	RFD	81922	1.9917	mg/g	Lucerne Dehydrator 5/10 - 13/10	NA	NA	81922	NA	1	1		W9A09YANA_RFD	YANA
1884	SENTINEL	114920	2009	1895	7	5	3	W9A09YANA	347	6	40	1	2	RFD	81923	1.931	mg/g	Hurricane Dehydrator 13/10/09	NA	NA	81923	NA	1	1		W9A09YANA_RFD	YANA
1885	HRZ03_0061	115025	2009	1560	7	5	4	W9A09YANA	97	7	17	1	1	IRR	81924	1.319	mg/g	Lucerne Dehydrator 5/10 - 13/10	NA	NA	81389	81924	1	2		W9A09YANA_IRR	YANA
1886	VS2177	114398	2009	1490	7	5	5	W9A09YANA	381	2	30	1	1	IRR	81925	1.5671	mg/g	Lucerne Dehydrator 5/10 - 13/10	NA	NA	81925	NA	1	1		W9A09YANA_IRR	YANA
1887	HRZ05_0283	113549	2009	307	7	5	6	W9A09COLE	189	28	29	1	1	RFD	81926	2.7135	mg/g	Yanco Hurricane 20/10	NA	NA	81926	NA	1	1		W9A09COLE_RFD	COLE
1888	VW3717	116058	2009	1679	7	5	7	W9A09YANA	509	15	26	1	1	IRR	81927	1.1084	mg/g	Lucerne Dehydrator 13/10/09	NA	NA	81927	NA	1	1		W9A09YANA_IRR	YANA
1889	HRZ04_0157	112314	2009	1279	7	5	8	W9A09COLE	118	17	114	2	4	RFD	81928	1.6443	mg/g	Lucerne Dehydrator 19/10	NA	NA	80894	81928	1	2		W9A09COLE_RFD	COLE
1890	VW2410	113540	2009	304	7	5	9	W9A09COLE	475	28	20	1	1	RFD	81929	1.8449	mg/g	Yanco Hurricane 20/10	NA	NA	81929	NA	1	1		W9A09COLE_RFD	COLE
1891	RAC1451	118146	2009	2543	7	5	10	W9A09YANA	335	31	66	2	3	RFD	81930	1.3791	mg/g	Lucerne Dehydrator 5/10 - 13/10	NA	NA	81930	NA	1	1		W9A09YANA_RFD	YANA
1892	WW19492	115711	2009	1981	7	5	11	W9A09YANA	705	12	63	1	2	RFD	81931	1.8117	mg/g	Lucerne Dehydrator then Leeton Farm 13/10/09	NA	NA	81931	NA	1	1		W9A09YANA_RFD	YANA
1893	SUN562A	111531	2009	484	7	5	12	W9A09COLE	366	11	51	1	2	IRR	81932	1.6559	mg/g	Leeton Hurricane 20/10	NA	NA	81932	NA	1	1		W9A09COLE_IRR	COLE
1894	PAVON_DWARF	115057	2009	1914	7	5	13	W9A09YANA	301	7	49	1	2	RFD	81933	1.028	mg/g	Lucerne Dehydrator 5/10 - 13/10	NA	NA	81490	81933	1	2		W9A09YANA_RFD	YANA
1895	WW20291	116267	2009	2705	7	5	14	W9A09YANA	763	16	107	2	4	IRR	81934	1.9599	mg/g	Hurricane Dehydrator 13/10/09	NA	NA	81934	NA	1	1		W9A09YANA_IRR	YANA
1896	HRZ06_0053	112594	2009	582	7	5	15	W9A09COLE	205	20	34	1	2	IRR	81935	2.1939	mg/g	Leeton Hurricane 20/10	NA	NA	81935	NA	1	1		W9A09COLE_IRR	COLE
1897	HRZ05_0145	116380	2009	2384	7	5	16	W9A09YANA	177	17	92	2	3	RFD	81936	0.65939	mg/g	Lucerne Dehydrator 5/10 - 13/10	NA	NA	81936	NA	1	1		W9A09YANA_RFD	YANA
1898	WW20558	110815	2009	410	7	5	18	W9A09COLE	774	5	55	1	2	IRR	81938	1.6036	mg/g	Leeton Hurricane 20/10	NA	NA	81938	NA	1	1		W9A09COLE_IRR	COLE
1899	WW17062	116474	2009	2040	7	5	19	W9A09YANA	612	18	58	1	2	RFD	81939	1.2638	mg/g	Lucerne Dehydrator 5/10 - 13/10	NA	NA	81939	NA	1	1		W9A09YANA_RFD	YANA
1900	LPB04_2386_1303	113992	2009	1436	7	5	20	W9A09COLE	292	31	112	2	4	RFD	81940	2.692	mg/g	Lucerne Dehydrator 19/10	NA	NA	81940	NA	1	1		W9A09COLE_RFD	COLE
1901	65211_176	114245	2009	1461	7	5	21	W9A09YANA	12	1	5	1	1	IRR	81941	1.9182	mg/g	Lucerne Dehydrator 5/10 - 13/10	NA	NA	81941	NA	1	1		W9A09YANA_IRR	YANA
1902	WW19562	113193	2009	635	7	5	22	W9A09COLE	712	25	33	1	2	IRR	81942	2.2231	mg/g	Leeton Hurricane 20/10	NA	NA	81942	NA	1	1		W9A09COLE_IRR	COLE
1903	HRZ04_0513	114420	2009	1842	7	5	23	W9A09YANA	152	2	52	1	2	RFD	81943	1.5135	mg/g	Lucerne Dehydrator 5/10 - 13/10	NA	NA	80247	81943	1	2		W9A09YANA_RFD	YANA
1904	RAC1505	113424	2009	294	7	5	24	W9A09COLE	344	27	24	1	1	RFD	81944	1.9524	mg/g	Yanco Hurricane 20/10	NA	NA	81944	NA	1	1		W9A09COLE_RFD	COLE
1905	AUS33467	117293	2009	2817	7	5	25	W9A09YANA	28	24	109	2	4	IRR	81945	2.2198	mg/g	Hurricane Dehydrator 13/10/09	NA	NA	81945	NA	1	1		W9A09YANA_IRR	YANA
1906	VW0318	113108	2009	983	7	5	26	W9A09COLE	423	24	68	2	3	IRR	81946	1.5862	mg/g	Yanco Hurricane 19/10	NA	NA	81946	NA	1	1		W9A09COLE_IRR	COLE
1907	QT13390	115079	2009	2255	7	5	27	W9A09YANA	316	7	71	2	3	RFD	81947	0.95234	mg/g	Lucerne Dehydrator 5/10 - 13/10	NA	NA	80203	81947	1	2		W9A09YANA_RFD	YANA
1908	WW19684	112740	2009	595	7	5	28	W9A09COLE	731	21	60	1	2	IRR	81948	1.2833	mg/g	Leeton Hurricane 20/10	NA	NA	81948	NA	1	1		W9A09COLE_IRR	COLE
1909	WW18784	111468	2009	1201	7	5	29	W9A09COLE	670	10	108	2	4	RFD	81949	1.0347	mg/g	Lucerne Dehydrator 19/10	NA	NA	81949	NA	1	1		W9A09COLE_RFD	COLE
1910	WW18946	113906	2009	338	7	5	30	W9A09COLE	687	31	26	1	1	RFD	81950	2.232	mg/g	Yanco Hurricane 20/10	NA	NA	80868	81950	1	2		W9A09COLE_RFD	COLE
1911	VW0779	116753	2009	2419	7	6	1	W9A09YANA	437	20	81	2	3	RFD	81951	1.4042	mg/g	Lucerne Dehydrator 5/10 - 13/10	NA	NA	81040	81951	1	2		W9A09YANA_RFD	YANA
1912	VU3750	110476	2009	748	7	6	2	W9A09COLE	393	2	76	2	3	IRR	81952	1.3976	mg/g	Yanco Hurricane 19/10	NA	NA	81952	NA	1	1		W9A09COLE_IRR	COLE
1913	118849_303	110300	2009	9	7	6	3	W9A09COLE	3	1	20	1	1	RFD	81953	2.4918	mg/g	Yanco Hurricane 20/10	NA	NA	81953	NA	1	1		W9A09COLE_RFD	COLE
1914	WW21573	110589	2009	753	7	6	4	W9A09COLE	825	3	69	2	3	IRR	81954	2.4414	mg/g	Yanco Hurricane 19/10	NA	NA	81954	NA	1	1		W9A09COLE_IRR	COLE
1915	WEEBILL1	113472	2009	1017	7	6	5	W9A09COLE	550	27	72	2	3	IRR	81955	3.2	mg/g	Yanco Hurricane 19/10	NA	NA	81470	81955	1	2		W9A09COLE_IRR	COLE
1916	VW0760	111048	2009	428	7	6	6	W9A09COLE	436	7	48	1	2	IRR	81956	2.2014	mg/g	Leeton Hurricane 20/10	NA	NA	81956	NA	1	1		W9A09COLE_IRR	COLE
1917	HRZ06_0250	116046	2009	1675	7	6	7	W9A09YANA	232	15	14	1	1	IRR	81957	1.4297	mg/g	Lucerne Dehydrator 13/10/09	NA	NA	81957	NA	1	1		W9A09YANA_IRR	YANA
1918	LPB04_2351	114277	2009	1827	7	6	8	W9A09YANA	288	1	37	1	2	RFD	81958	1.4085	mg/g	Lucerne Dehydrator 13/10/09	NA	NA	81958	NA	1	1		W9A09YANA_RFD	YANA
1919	VW2405	112218	2009	183	7	6	9	W9A09COLE	474	17	18	1	1	RFD	81959	1.6153	mg/g	Lucerne Dehydrator 20/10	NA	NA	81959	NA	1	1		W9A09COLE_RFD	COLE
1920	HRZ06_0141	115909	2009	1657	7	6	10	W9A09YANA	221	14	5	1	1	IRR	81960	1.6666	mg/g	Hurricane Dehydrator 13/10/09	NA	NA	81960	NA	1	1		W9A09YANA_IRR	YANA
1921	CHARA	113397	2009	1377	7	6	11	W9A09COLE	52	26	117	2	4	RFD	81961	2.0325	mg/g	Lucerne Dehydrator 19/10	NA	NA	81961	NA	1	1		W9A09COLE_RFD	COLE
1922	NLS03SB52	113475	2009	1019	7	6	12	W9A09COLE	299	27	75	2	3	IRR	81962	2.3809	mg/g	Yanco Hurricane 19/10	NA	NA	80543	81962	1	2		W9A09COLE_IRR	COLE
1923	WYLAH	111013	2009	77	7	6	13	W9A09COLE	838	7	13	1	1	RFD	81963	2.3805	mg/g	Lucerne Dehydrator 20/10	NA	NA	81963	NA	1	1		W9A09COLE_RFD	COLE
1924	NLS03SB52	111472	2009	1202	7	6	14	W9A09COLE	299	10	112	2	4	RFD	81964	1.2567	mg/g	Lucerne Dehydrator 19/10	NA	NA	81964	NA	1	1		W9A09COLE_RFD	COLE
1925	HRZ06_0183	115493	2009	2636	7	6	15	W9A09YANA	226	10	101	2	4	IRR	81965	1.8557	mg/g	Hurricane Dehydrator 13/10/09	NA	NA	80452	81965	1	2		W9A09YANA_IRR	YANA
1926	VW1152	118200	2009	2919	7	6	16	W9A09YANA	444	31	120	2	4	IRR	81966	1.6207	mg/g	Hurricane Dehydrator 13/10/09	NA	NA	81966	NA	1	1		W9A09YANA_IRR	YANA
1927	SUN571B	116087	2009	2015	7	6	17	W9A09YANA	369	15	55	1	2	RFD	81967	1.3761	mg/g	Lucerne Dehydrator 5/10 - 13/10	NA	NA	81967	NA	1	1		W9A09YANA_RFD	YANA
1928	WAGT023	117585	2009	1782	7	6	18	W9A09YANA	526	27	17	1	1	IRR	81968	1.824	mg/g	Hurricane Dehydrator 13/10/09	NA	NA	81968	NA	1	1		W9A09YANA_IRR	YANA
1929	HRZ06_0270	112052	2009	1251	7	6	19	W9A09COLE	239	15	92	2	4	RFD	81969	1.724	mg/g	Lucerne Dehydrator 19/10	NA	NA	81969	NA	1	1		W9A09COLE_RFD	COLE
1930	GILES	118131	2009	2188	7	6	20	W9A09YANA	76	31	51	1	2	RFD	81970	1.367	mg/g	Lucerne Dehydrator 5/10 - 13/10	NA	NA	81970	NA	1	1		W9A09YANA_RFD	YANA
1931	WW20680	113449	2009	664	7	6	21	W9A09COLE	789	27	49	1	2	IRR	81971	1.6137	mg/g	Leeton Hurricane 20/10	NA	NA	81971	NA	1	1		W9A09COLE_IRR	COLE
1932	WI25053	113681	2009	688	7	6	22	W9A09COLE	551	29	41	1	2	IRR	81972	1.5522	mg/g	Leeton Hurricane 20/10	NA	NA	80624	81972	1	2		W9A09COLE_IRR	COLE
1933	WW19987	114613	2009	2579	7	6	23	W9A09YANA	752	3	117	2	4	IRR	81973	1.8334	mg/g	Hurricane Dehydrator 13/10/09	NA	NA	81973	NA	1	1		W9A09YANA_IRR	YANA
1934	HRZ06_2202	111568	2009	849	7	6	24	W9A09COLE	274	11	88	2	3	IRR	81974	2.5266	mg/g	Lucerne Dehydrator 19/10	NA	NA	81974	NA	1	1		W9A09COLE_IRR	COLE
1935	VW0857	116494	2009	2391	7	6	25	W9A09YANA	440	18	78	2	3	RFD	81975	1.2517	mg/g	Lucerne Dehydrator 5/10 - 13/10	NA	NA	81975	NA	1	1		W9A09YANA_RFD	YANA
1936	WW19492	114081	2009	1079	7	6	26	W9A09COLE	705	32	81	2	3	IRR	81976	2.0446	mg/g	Yanco Hurricane 19/10	NA	NA	81310	81976	1	2		W9A09COLE_IRR	COLE
1937	RAC1393	114153	2009	719	7	6	27	W9A09COLE	325	33	33	1	2	IRR	81977	2.18	mg/g	Leeton Hurricane 20/10	NA	NA	81977	NA	1	1		W9A09COLE_IRR	COLE
1938	HRZ06_2087	116800	2009	2771	7	6	28	W9A09YANA	266	20	128	2	4	IRR	81978	1.6491	mg/g	Hurricane Dehydrator 13/10/09	NA	NA	81978	NA	1	1		W9A09YANA_IRR	YANA
1939	HRZ04_0421	115033	2009	1562	7	6	29	W9A09YANA	147	7	25	1	1	IRR	81979	1.8221	mg/g	Lucerne Dehydrator 5/10 - 13/10	NA	NA	81979	NA	1	1		W9A09YANA_IRR	YANA
1940	PASTOR	114496	2009	2571	7	6	30	W9A09YANA	300	2	128	2	4	IRR	81980	1.9313	mg/g	Hurricane Dehydrator 13/10/09	NA	NA	81980	NA	1	1		W9A09YANA_IRR	YANA
1941	HRZ03_0062	111536	2009	486	7	7	1	W9A09COLE	98	11	56	1	2	IRR	81981	0.90443	mg/g	Leeton Hurricane 20/10	NA	NA	81981	NA	1	1		W9A09COLE_IRR	COLE
1942	HRZ06_0065	111158	2009	439	7	7	2	W9A09COLE	211	8	38	1	2	IRR	81982	2.2602	mg/g	Leeton Hurricane 20/10	NA	NA	80569	81982	1	2		W9A09COLE_IRR	COLE
1943	SUPER_SERI_1	112236	2009	548	7	7	3	W9A09COLE	374	17	36	1	2	IRR	81983	2.2111	mg/g	Leeton Hurricane 20/10	NA	NA	81983	NA	1	1		W9A09COLE_IRR	COLE
1944	WW19513	111063	2009	798	7	7	4	W9A09COLE	707	7	63	2	3	IRR	81984	2.6287	mg/g	Lucerne Dehydrator 19/10	NA	NA	81984	NA	1	1		W9A09COLE_IRR	COLE
1945	TAMMARIN_ROCK	116592	2009	2050	7	7	5	W9A09YANA	375	19	48	1	2	RFD	81985	0.86995	mg/g	Lucerne Dehydrator then Leeton Farm 13/10/09	NA	NA	81985	NA	1	1		W9A09YANA_RFD	YANA
1946	RAC1451	115447	2009	1955	7	7	6	W9A09YANA	335	10	55	1	2	RFD	81986	1.1842	mg/g	Lucerne Dehydrator then Leeton Farm 13/10/09	NA	NA	81986	NA	1	1		W9A09YANA_RFD	YANA
1947	MCCUBBIN	111354	2009	1191	7	7	7	W9A09COLE	296	9	114	2	4	RFD	81987	1.5872	mg/g	Lucerne Dehydrator 19/10	NA	NA	81987	NA	1	1		W9A09COLE_RFD	COLE
1948	WW18946	114266	2009	1473	7	7	8	W9A09YANA	687	1	26	1	1	IRR	81988	1.0034	mg/g	Lucerne Dehydrator 5/10 - 13/10	NA	NA	81988	NA	1	1		W9A09YANA_IRR	YANA
1949	JANZ	110910	2009	70	7	7	9	W9A09COLE	278	6	30	1	1	RFD	81989	1.8585	mg/g	Lucerne Dehydrator 20/10	NA	NA	81989	NA	1	1		W9A09COLE_RFD	COLE
1950	LPB04_2324	116397	2009	2720	7	7	10	W9A09YANA	287	17	109	2	4	IRR	81990	2.0101	mg/g	Hurricane Dehydrator 13/10/09	NA	NA	81990	NA	1	1		W9A09YANA_IRR	YANA
1951	HRZ06_0067	116634	2009	2408	7	7	11	W9A09YANA	213	19	90	2	3	RFD	81991	1.3432	mg/g	Lucerne Dehydrator 5/10 - 13/10	NA	NA	81591	81991	1	2		W9A09YANA_RFD	YANA
1952	VW2426	110813	2009	409	7	7	12	W9A09COLE	476	5	53	1	2	IRR	81992	1.4309	mg/g	Leeton Hurricane 20/10	NA	NA	81992	NA	1	1		W9A09COLE_IRR	COLE
1953	HRZ03_0062	117522	2009	2486	7	7	13	W9A09YANA	98	26	82	2	3	RFD	81993	1.3425	mg/g	Lucerne Dehydrator 5/10 - 13/10	NA	NA	81993	NA	1	1		W9A09YANA_RFD	YANA
1954	WW19716	116185	2009	1691	7	7	14	W9A09YANA	733	16	25	1	1	IRR	81994	1.6234	mg/g	Lucerne Dehydrator 13/10/09	NA	NA	81994	NA	1	1		W9A09YANA_IRR	YANA
1955	VW4056	113857	2009	1421	7	7	15	W9A09COLE	514	30	97	2	4	RFD	81995	1.7948	mg/g	Lucerne Dehydrator 19/10	NA	NA	81995	NA	1	1		W9A09COLE_RFD	COLE
1956	VW0398	110670	2009	51	7	7	16	W9A09COLE	429	4	30	1	1	RFD	81996	2.2311	mg/g	Yanco Hurricane 20/10	NA	NA	80900	81996	1	2		W9A09COLE_RFD	COLE
1957	HRZ06_2178	112951	2009	616	7	7	17	W9A09COLE	272	23	31	1	2	IRR	81997	2.7356	mg/g	Leeton Hurricane 20/10	NA	NA	81997	NA	1	1		W9A09COLE_IRR	COLE
1958	WW19932	113476	2009	1020	7	7	18	W9A09COLE	747	27	76	2	3	IRR	81998	2.5717	mg/g	Yanco Hurricane 19/10	NA	NA	81998	NA	1	1		W9A09COLE_IRR	COLE
1959	VW4056	113441	2009	660	7	7	19	W9A09COLE	514	27	41	1	2	IRR	81999	1.9998	mg/g	Leeton Hurricane 20/10	NA	NA	81999	NA	1	1		W9A09COLE_IRR	COLE
1960	HRZ06_2178	116510	2009	2398	7	7	20	W9A09YANA	272	18	94	2	3	RFD	82000	0.91996	mg/g	Lucerne Dehydrator 5/10 - 13/10	NA	NA	81186	82000	1	2		W9A09YANA_RFD	YANA
1961	HRZ06_0079	117271	2009	2463	7	7	21	W9A09YANA	220	24	87	2	3	RFD	82001	1.4713	mg/g	Lucerne Dehydrator then Leeton Farm 13/10/09	NA	NA	82001	NA	1	1		W9A09YANA_RFD	YANA
1962	VW0857	113205	2009	640	7	7	22	W9A09COLE	440	25	45	1	2	IRR	82002	1.7481	mg/g	Leeton Hurricane 20/10	NA	NA	82002	NA	1	1		W9A09COLE_IRR	COLE
1963	VW4355	115833	2009	1992	7	7	23	W9A09YANA	520	13	57	1	2	RFD	82003	1.4272	mg/g	Lucerne Dehydrator 5/10 - 13/10	NA	NA	82003	NA	1	1		W9A09YANA_RFD	YANA
1964	WAGT025	110559	2009	389	7	7	24	W9A09COLE	527	3	39	1	2	IRR	82004	1.7091	mg/g	Leeton Hurricane 20/10	NA	NA	80811	82004	1	2		W9A09COLE_IRR	COLE
1965	HRZ05_0283	117348	2009	2110	7	7	25	W9A09YANA	189	25	36	1	2	RFD	82005	2.3115	mg/g	Lucerne Dehydrator 5/10 - 13/10	NA	NA	82005	NA	1	1		W9A09YANA_RFD	YANA
1966	HRZ06_0055	111303	2009	821	7	7	26	W9A09COLE	206	9	63	2	3	IRR	82006	1.9859	mg/g	Lucerne Dehydrator 19/10	NA	NA	82006	NA	1	1		W9A09COLE_IRR	COLE
1967	WW20665	115179	2009	1925	7	7	27	W9A09YANA	786	8	43	1	2	RFD	82007	1.4448	mg/g	Lucerne Dehydrator 5/10 - 13/10	NA	NA	82007	NA	1	1		W9A09YANA_RFD	YANA
1968	DAKOTA	116372	2009	2380	7	7	28	W9A09YANA	56	17	84	2	3	RFD	82008	1.1953	mg/g	Lucerne Dehydrator 5/10 - 13/10	NA	NA	82008	NA	1	1		W9A09YANA_RFD	YANA
1969	VW1498	118053	2009	2896	7	7	29	W9A09YANA	455	30	101	2	4	IRR	82009	1.7751	mg/g	Hurricane Dehydrator 13/10/09	NA	NA	80216	82009	1	2		W9A09YANA_IRR	YANA
1970	GASCOIGNE	117186	2009	1753	7	7	30	W9A09YANA	71	24	2	1	1	IRR	82010	1.8318	mg/g	Lucerne Dehydrator 5/10 - 13/10	NA	NA	82010	NA	1	1		W9A09YANA_IRR	YANA
1971	WW19665	113723	2009	1048	7	8	1	W9A09COLE	728	29	83	2	3	IRR	82011	1.4059	mg/g	Yanco Hurricane 19/10	NA	NA	82011	NA	1	1		W9A09COLE_IRR	COLE
1972	HRZ06_0323	113821	2009	1051	7	8	2	W9A09COLE	249	30	61	2	3	IRR	82012	2.0606	mg/g	Yanco Hurricane 19/10	NA	NA	82012	NA	1	1		W9A09COLE_IRR	COLE
1973	WW18830	111149	2009	94	7	8	3	W9A09COLE	677	8	29	1	1	RFD	82013	1.5714	mg/g	Lucerne Dehydrator 20/10	NA	NA	82013	NA	1	1		W9A09COLE_RFD	COLE
1974	RAC1418	115817	2009	1983	7	8	4	W9A09YANA	330	13	41	1	2	RFD	82014	1.4277	mg/g	Lucerne Dehydrator 5/10 - 13/10	NA	NA	81587	82014	1	2		W9A09YANA_RFD	YANA
1975	VW3170	111484	2009	117	7	8	5	W9A09COLE	486	11	4	1	1	RFD	82015	1.0641	mg/g	Lucerne Dehydrator 20/10	NA	NA	82015	NA	1	1		W9A09COLE_RFD	COLE
1976	VW3595	115041	2009	1906	7	8	6	W9A09YANA	503	7	33	1	2	RFD	82016	1.5735	mg/g	Lucerne Dehydrator 5/10 - 13/10	NA	NA	82016	NA	1	1		W9A09YANA_RFD	YANA
1977	VW2410	112253	2009	554	7	8	7	W9A09COLE	475	17	53	1	2	IRR	82017	0.51458	mg/g	Leeton Hurricane 20/10	NA	NA	81165	82017	1	2		W9A09COLE_IRR	COLE
1978	LPB0602	116791	2009	2766	7	8	8	W9A09YANA	294	20	119	2	4	IRR	82018	1.3775	mg/g	Hurricane Dehydrator 13/10/09	NA	NA	82018	NA	1	1		W9A09YANA_IRR	YANA
1979	WW20214	117275	2009	2465	7	8	9	W9A09YANA	758	24	91	2	3	RFD	82019	1.13	mg/g	Lucerne Dehydrator 5/10 - 13/10	NA	NA	82019	NA	1	1		W9A09YANA_RFD	YANA
1980	EGA_GREGORY	115710	2009	1980	7	8	10	W9A09YANA	62	12	62	1	2	RFD	82020	1.392	mg/g	Lucerne Dehydrator 5/10 - 13/10	NA	NA	81365	82020	1	2		W9A09YANA_RFD	YANA
1981	VU2828_1	113561	2009	674	7	8	11	W9A09COLE	390	28	41	1	2	IRR	82021	1.3949	mg/g	Leeton Hurricane 20/10	NA	NA	82021	NA	1	1		W9A09COLE_IRR	COLE
1982	VW0644	112184	2009	1265	7	8	12	W9A09COLE	433	16	104	2	4	RFD	82022	1.666	mg/g	Lucerne Dehydrator 19/10	NA	NA	82022	NA	1	1		W9A09COLE_RFD	COLE
1983	VW3404	113127	2009	989	7	8	13	W9A09COLE	493	24	87	2	3	IRR	82023	1.2462	mg/g	Yanco Hurricane 19/10	NA	NA	82023	NA	1	1		W9A09COLE_IRR	COLE
1984	HRZ04_0425	117975	2009	1819	7	8	14	W9A09YANA	148	30	23	1	1	IRR	82024	1.3454	mg/g	Lucerne Dehydrator 5/10 - 13/10	NA	NA	80920	82024	1	2		W9A09YANA_IRR	YANA
1985	SUNBRI	112798	2009	1336	7	8	15	W9A09COLE	372	21	118	2	4	RFD	82025	2.038	mg/g	Lucerne Dehydrator 19/10	NA	NA	82025	NA	1	1	reweigh	W9A09COLE_RFD	COLE
1986	VW1864	117499	2009	2131	7	8	16	W9A09YANA	458	26	59	1	2	RFD	82026	1.6743	mg/g	Lucerne Dehydrator 5/10 - 13/10	NA	NA	82026	NA	1	1		W9A09YANA_RFD	YANA
1987	WW21842	111921	2009	884	7	8	17	W9A09COLE	829	14	81	2	3	IRR	82027	2.2241	mg/g	Lucerne Dehydrator 19/10	NA	NA	82027	NA	1	1		W9A09COLE_IRR	COLE
1988	WW19987	117582	2009	1781	7	8	18	W9A09YANA	752	27	14	1	1	IRR	82028	1.1758	mg/g	Lucerne Dehydrator 5/10 - 13/10	NA	NA	80101	82028	1	2		W9A09YANA_IRR	YANA
1989	HRZ06_2070	114696	2009	2218	7	8	19	W9A09YANA	261	4	72	2	3	RFD	82029	1.0802	mg/g	Lucerne Dehydrator 5/10 - 13/10	NA	NA	82029	NA	1	1		W9A09YANA_RFD	YANA
1990	114892_109	110665	2009	49	7	8	20	W9A09COLE	2	4	25	1	1	RFD	82030	2.1271	mg/g	Lucerne Dehydrator 20/10	NA	NA	82030	NA	1	1		W9A09COLE_RFD	COLE
1991	RAC1393	116737	2009	2412	7	8	21	W9A09YANA	325	20	65	2	3	RFD	82031	1.2503	mg/g	Lucerne Dehydrator then Leeton Farm 13/10/09	NA	NA	81595	82031	1	2		W9A09YANA_RFD	YANA
1992	WW20096	112551	2009	1307	7	8	22	W9A09COLE	754	19	111	2	4	RFD	82032	0.93711	mg/g	Lucerne Dehydrator 19/10	NA	NA	82032	NA	1	1		W9A09COLE_RFD	COLE
1993	RAC1505	116581	2009	2043	7	8	23	W9A09YANA	344	19	37	1	2	RFD	82033	1.1977	mg/g	Lucerne Dehydrator then Leeton Farm 13/10/09	NA	NA	82033	NA	1	1		W9A09YANA_RFD	YANA
1994	WW20214	112984	2009	966	7	8	24	W9A09COLE	758	23	64	2	3	IRR	82034	1.8731	mg/g	Yanco Hurricane 19/10	NA	NA	82034	NA	1	1		W9A09COLE_IRR	COLE
1995	WW19716	111706	2009	1219	7	8	26	W9A09COLE	733	12	106	2	4	RFD	82036	1.9596	mg/g	Lucerne Dehydrator 19/10	NA	NA	82036	NA	1	1		W9A09COLE_RFD	COLE
1996	VW2373	117024	2009	2440	7	8	27	W9A09YANA	468	22	96	2	3	RFD	82037	0.79471	mg/g	Lucerne Dehydrator 5/10 - 13/10	NA	NA	81384	82037	1	2		W9A09YANA_RFD	YANA
1997	HRZ03_0076	112493	2009	575	7	8	28	W9A09COLE	103	19	53	1	2	IRR	82038	0.84058	mg/g	Leeton Hurricane 20/10	NA	NA	82038	NA	1	1		W9A09COLE_IRR	COLE
1998	HRZ05_0159	116532	2009	2737	7	8	29	W9A09YANA	182	18	116	2	4	IRR	82039	1.834	mg/g	Hurricane Dehydrator 13/10/09	NA	NA	82039	NA	1	1		W9A09YANA_IRR	YANA
1999	HRZ04_0421	115379	2009	2631	7	8	30	W9A09YANA	147	9	115	2	4	IRR	82040	1.977	mg/g	Hurricane Dehydrator 13/10/09	NA	NA	82040	NA	1	1		W9A09YANA_IRR	YANA
[truncated: 4,241 more rows]
